# Supplementary material for: Rationale for the reactivity differences between main group and d0 transition metal complexes toward olefin polymerisation
Source: Royal Society of Chemistry journal article supplement (doi:10.1039/c9dt01017c), 2019-01-01
Supplement: c9dt01017c1.pdf [file c9dt01017c1.pdf]

## Supporting Information for:

### Rationale for the reactivity differences between main group and $d^0$ transition metal complexes toward olefin polymerization

Elham S. Tabatabaie, <sup>a</sup> Saeed Dehghanpour, <sup>a</sup> Elnaz Mosaddegh, <sup>b</sup> Rasool Babaahmadi, <sup>c</sup> Antony Chipman, <sup>c</sup> Brian F. Yates, <sup>c</sup> and Alireza Ariafard\*<sup>c</sup>

<sup>a</sup> Department of Chemistry, Alzahra University, P.O. Box 1993891176, Vanak, Tehran Iran

<sup>b</sup> Department of Chemistry, Islamic Azad University, Central Tehran Branch, Shahrak Gharb, Tehran, Iran

<sup>c</sup> School of Natural Science (Chemistry), University of Tasmania, Private Bag 75, Hobart TAS 7001, Australia. E-mail: alireza.ariafard@utas.edu.au

#### Contents:

**Figure SI1.** A plot of the correlation between  $\Delta E^\ddagger_1$  and  $\Delta E_{\text{strain}4}$  (ring strain energy in **M\_N\_V**) calculated by the M06/BS2//B3LYP/BS1 method. (page ESI2)

**Table SI4.** Cartesian coordinates and total energies for all of the calculated structures in water (page ESI2)

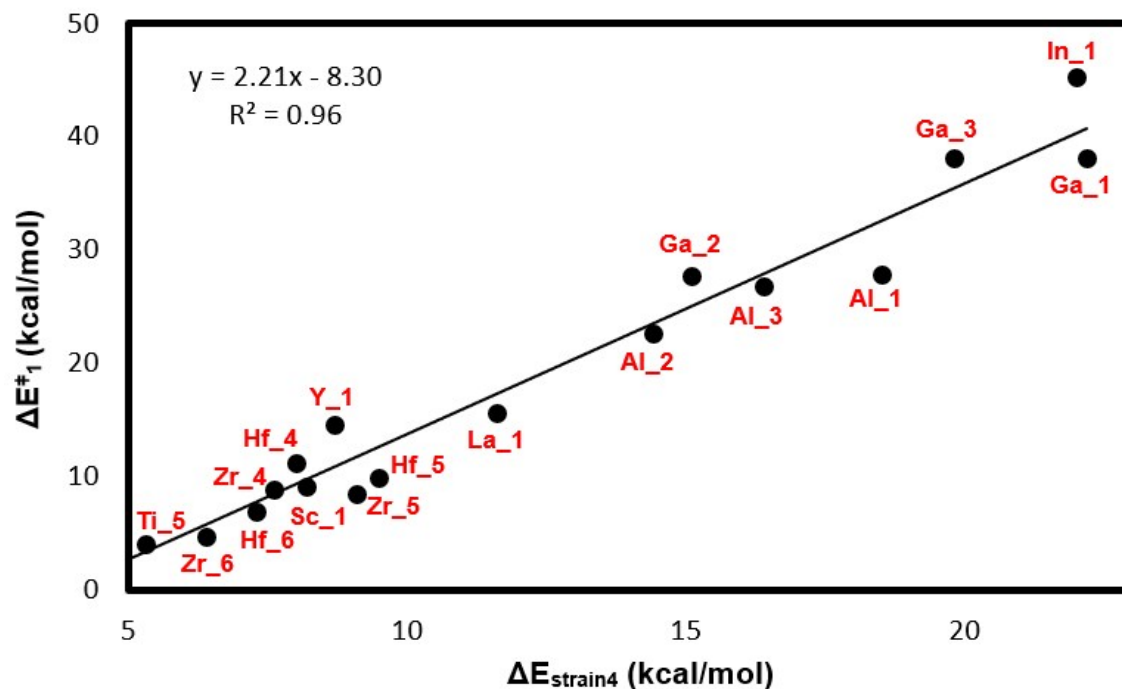

**Figure ESI1.** A plot of the correlation between  $\Delta E^{\ddagger}_1$  and  $\Delta E_{\text{strain}4}$  (ring strain energy in  $M\_N\_V$ ) calculated by the M06/BS2//B3LYP/BS1 method.

**Table ESI1.** Cartesian coordinates and total energies for all of the calculated structures

**Al\_1\_I**

E (B3LYP/BS1) = -730.691864 au

H(B3LYP/BS1) = -730.390992 au

G(B3LYP/BS1) = -730.455831 au

E(B3LYP/BS2//B3LYP/BS1, solvent = dichloromethane) = -971.429259 au

E(M06/BS2//B3LYP/BS1, solvent = dichloromethane) = -970.821093 au

|   |             |             |             |
|---|-------------|-------------|-------------|
| C | -1.23869900 | 1.93429500  | -0.52104500 |
| C | 1.23868900  | 1.93429800  | -0.52107700 |
| C | -0.00000800 | 2.55871400  | -0.65791100 |
| H | 2.13649500  | 2.53537400  | -0.65725100 |
| H | -0.00001300 | 3.61331100  | -0.90489700 |
| H | -2.13651000 | 2.53536800  | -0.65719800 |
| N | 1.43799600  | 0.63288800  | -0.24407400 |
| N | -1.43799700 | 0.63288300  | -0.24403800 |
| C | 2.79483400  | 0.16742700  | -0.06495000 |
| C | 3.65524400  | 0.81944700  | 0.82649300  |
| C | 3.22979900  | -0.95685800 | -0.77534700 |
| C | 4.95797600  | 0.34858400  | 0.99196200  |
| H | 3.30167200  | 1.67093000  | 1.40124300  |
| C | 4.53220900  | -1.42456700 | -0.59658700 |
| H | 2.57036600  | -1.44000000 | -1.49272900 |
| C | 5.39772900  | -0.77241600 | 0.28419800  |
| H | 5.62461200  | 0.85322000  | 1.68447400  |
| H | 4.87178500  | -2.29061300 | -1.15618300 |

|    |             |             |             |
|----|-------------|-------------|-------------|
| H  | 6.41085600  | -1.13759400 | 0.42000600  |
| C  | -2.79483800 | 0.16742000  | -0.06492700 |
| C  | -3.22982500 | -0.95680700 | -0.77540300 |
| C  | -3.65522800 | 0.81938700  | 0.82657200  |
| C  | -4.53224000 | -1.42451100 | -0.59666200 |
| H  | -2.57040800 | -1.43990200 | -1.49283200 |
| C  | -4.95796400 | 0.34853100  | 0.99202300  |
| H  | -3.30163600 | 1.67082700  | 1.40137500  |
| C  | -5.39774000 | -0.77241200 | 0.28418300  |
| H  | -4.87183600 | -2.29050900 | -1.15631900 |
| H  | -5.62458600 | 0.85312700  | 1.68457800  |
| H  | -6.41087100 | -1.13758600 | 0.41997500  |
| C  | 0.00003600  | -2.39526300 | 0.57500600  |
| H  | 0.00126000  | -3.05609200 | -0.30000100 |
| H  | 0.88772200  | -2.63653000 | 1.16933000  |
| H  | -0.88878600 | -2.63714900 | 1.16736700  |
| Al | 0.00000400  | -0.53062900 | 0.04974400  |

### Ga\_1\_I

E(B3LYP/BS1) = -730.736241 au

H(B3LYP/BS1) = -730.435453 au

G(B3LYP/BS1) = -730.501147 au

E(B3LYP/BS2//B3LYP/BS1, solvent = dichloromethane) = -2653.843930 au

E(M06/BS2//B3LYP/BS1, solvent = dichloromethane) = -2653.176980 au

|   |             |             |             |
|---|-------------|-------------|-------------|
| C | -1.24073400 | 1.99191900  | -0.52037700 |
| C | 1.24072700  | 1.99191800  | -0.52041200 |
| C | -0.00000600 | 2.61273700  | -0.65596300 |
| H | 2.13548200  | 2.59705300  | -0.65824900 |
| H | -0.00000900 | 3.66737300  | -0.90291700 |
| H | -2.13549200 | 2.59705300  | -0.65819200 |
| N | 1.44920200  | 0.69324400  | -0.24523800 |
| N | -1.44920300 | 0.69324400  | -0.24520000 |
| C | 2.80509600  | 0.22983600  | -0.06872200 |
| C | 3.67272200  | 0.89546800  | 0.80547800  |
| C | 3.23530700  | -0.90409400 | -0.76665000 |
| C | 4.97745300  | 0.42833400  | 0.96611600  |
| H | 3.32317500  | 1.75385600  | 1.37226000  |
| C | 4.53976000  | -1.36749900 | -0.59316900 |
| H | 2.56916900  | -1.39848900 | -1.46986000 |
| C | 5.41252600  | -0.70182500 | 0.27036600  |
| H | 5.64920500  | 0.94316500  | 1.64607300  |
| H | 4.87540400  | -2.24107200 | -1.14339300 |
| H | 6.42726900  | -1.06391300 | 0.40231300  |
| C | -2.80509800 | 0.22983300  | -0.06869900 |
| C | -3.23532700 | -0.90404500 | -0.76670300 |
| C | -3.67270900 | 0.89541500  | 0.80555200  |
| C | -4.53978500 | -1.36744700 | -0.59324100 |
| H | -2.56920100 | -1.39839600 | -1.46995600 |
| C | -4.97744400 | 0.42828500  | 0.96617000  |
| H | -3.32314800 | 1.75376400  | 1.37238400  |
| C | -5.41253500 | -0.70182200 | 0.27034800  |
| H | -4.87544400 | -2.24097800 | -1.14352300 |
| H | -5.64918500 | 0.94307900  | 1.64616700  |
| H | -6.42728100 | -1.06390800 | 0.40227900  |
| C | 0.00002200  | -2.34894500 | 0.56523000  |

|    |             |             |             |
|----|-------------|-------------|-------------|
| H  | 0.00156000  | -2.99291200 | -0.32032200 |
| H  | 0.89082500  | -2.57833100 | 1.15663100  |
| H  | -0.89223300 | -2.57907200 | 1.15413800  |
| Ga | 0.00000200  | -0.47910000 | 0.04759000  |

### In\_1\_I

E (B3LYP/BS1) = -730.533944 au

H(B3LYP/BS1) = -730.233828 au

G(B3LYP/BS1) = -730.302243 au

E(B3LYP/BS2//B3LYP/BS1, solvent = dichloromethane) = -919.116406 au

E(M06/BS2//B3LYP/BS1, solvent = dichloromethane) = -918.535020 au

|    |             |             |             |
|----|-------------|-------------|-------------|
| C  | -1.25478200 | 2.06706400  | -0.48870000 |
| C  | 1.25479200  | 2.06705600  | -0.48869800 |
| C  | 0.00000700  | 2.66785400  | -0.60853000 |
| H  | 2.12577000  | 2.70950000  | -0.61870300 |
| H  | 0.00001100  | 3.72772200  | -0.83407100 |
| H  | -2.12575500 | 2.70951200  | -0.61870900 |
| N  | 1.51849800  | 0.77525900  | -0.24624900 |
| N  | -1.51849200 | 0.77526800  | -0.24625100 |
| C  | 2.88861700  | 0.36400000  | -0.08677200 |
| C  | 3.75630500  | 1.06716600  | 0.75899900  |
| C  | 3.34127100  | -0.77340200 | -0.76709300 |
| C  | 5.07518000  | 0.63663100  | 0.90659300  |
| H  | 3.39511200  | 1.92658600  | 1.31669000  |
| C  | 4.65945300  | -1.20117700 | -0.60720700 |
| H  | 2.67977500  | -1.29679400 | -1.45514300 |
| C  | 5.52923300  | -0.49613300 | 0.22754400  |
| H  | 5.74391400  | 1.18220600  | 1.56537900  |
| H  | 5.00814600  | -2.07663800 | -1.14632500 |
| H  | 6.55492600  | -0.82943900 | 0.35011400  |
| C  | -2.88861100 | 0.36400900  | -0.08677500 |
| C  | -3.34125400 | -0.77341200 | -0.76707200 |
| C  | -3.75630900 | 1.06719000  | 0.75897400  |
| C  | -4.65943500 | -1.20119000 | -0.60718500 |
| H  | -2.67975000 | -1.29681900 | -1.45510200 |
| C  | -5.07518300 | 0.63665200  | 0.90656700  |
| H  | -3.39512500 | 1.92662400  | 1.31664900  |
| C  | -5.52922600 | -0.49613000 | 0.22754200  |
| H  | -5.00811900 | -2.07666500 | -1.14628600 |
| H  | -5.74392400 | 1.18223800  | 1.56533600  |
| H  | -6.55491800 | -0.82943800 | 0.35011100  |
| C  | -0.00004600 | -2.63857000 | 0.57382700  |
| H  | 0.00052100  | -3.24552100 | -0.33563900 |
| H  | 0.89312200  | -2.87128400 | 1.15806500  |
| H  | -0.89379500 | -2.87147800 | 1.15709700  |
| In | 0.00000000  | -0.59121700 | 0.06461100  |

### Sc\_1\_I

E (B3LYP/BS1) = -775.145839 au

H(B3LYP/BS1) = -774.848457 au

G(B3LYP/BS1) = -774.915290 au

E(B3LYP/BS2//B3LYP/BS1, solvent = dichloromethane) = -1489.708029 au

E(M06/BS2//B3LYP/BS1, solvent = dichloromethane) = -1489.089859 au

|   |             |            |             |
|---|-------------|------------|-------------|
| C | -1.22732200 | 2.37567700 | -0.32854100 |
|---|-------------|------------|-------------|

|    |             |             |             |
|----|-------------|-------------|-------------|
| C  | 1.22732900  | 2.37569600  | -0.32857100 |
| C  | 0.00000300  | 3.04451400  | -0.32597700 |
| H  | 2.14750800  | 2.96200700  | -0.35959600 |
| H  | -0.00000600 | 4.12697100  | -0.35433500 |
| H  | -2.14750600 | 2.96197600  | -0.35962000 |
| N  | 1.33401100  | 1.04860400  | -0.32738900 |
| N  | -1.33399000 | 1.04859100  | -0.32722900 |
| C  | 2.53795200  | 0.31716300  | -0.23228000 |
| C  | 3.53361000  | 0.55988900  | 0.72785900  |
| C  | 2.61701500  | -0.84137600 | -1.03890900 |
| C  | 4.59502000  | -0.33324100 | 0.85775700  |
| H  | 3.45706000  | 1.42820100  | 1.37547200  |
| C  | 3.67665300  | -1.74458300 | -0.87945100 |
| H  | 1.94877000  | -0.94508700 | -1.90023200 |
| C  | 4.66288800  | -1.49147900 | 0.07206900  |
| H  | 5.36950900  | -0.13519500 | 1.59279900  |
| H  | 3.74362200  | -2.61790400 | -1.52118300 |
| H  | 5.48924300  | -2.18376700 | 0.19685700  |
| C  | -2.53795000 | 0.31715600  | -0.23219400 |
| C  | -2.61706100 | -0.84128900 | -1.03894400 |
| C  | -3.53358200 | 0.55981800  | 0.72798700  |
| C  | -3.67672900 | -1.74447500 | -0.87956700 |
| H  | -1.94881100 | -0.94495000 | -1.90026900 |
| C  | -4.59502300 | -0.33328700 | 0.85780600  |
| H  | -3.45698600 | 1.42806200  | 1.37568500  |
| C  | -4.66294300 | -1.49143600 | 0.07199200  |
| H  | -3.74373800 | -2.61772600 | -1.52139000 |
| H  | -5.36949500 | -0.13529300 | 1.59288000  |
| H  | -5.48932200 | -2.18370700 | 0.19671400  |
| C  | 0.00001600  | -0.98395300 | 2.01758500  |
| H  | 0.88990600  | -1.58136300 | 2.27480800  |
| H  | -0.00010000 | -0.09804200 | 2.66609000  |
| H  | -0.88980000 | -1.58152100 | 2.27470800  |
| Sc | 0.00003600  | -0.52532300 | -0.06375200 |

### Y\_1\_I

E(B3LYP/BS1) = -766.641492 au

H(B3LYP/BS1) -766.344579 au

G(B3LYP/BS1) = -766.413694 au

E(B3LYP/BS2//B3LYP/BS1, solvent = dichloromethane) = -767.352147 au

E(M06/BS2//B3LYP/BS1, solvent = dichloromethane) = -766.725000 au

|   |             |             |             |
|---|-------------|-------------|-------------|
| C | -1.23529600 | 2.41090200  | -0.30887500 |
| C | 1.23529600  | 2.41090000  | -0.30887300 |
| C | 0.00000000  | 3.06542100  | -0.30271800 |
| H | 2.14136200  | 3.02073400  | -0.30341200 |
| H | 0.00000100  | 4.14857300  | -0.30199300 |
| H | -2.14136200 | 3.02073600  | -0.30341400 |
| N | 1.38118400  | 1.08758300  | -0.34738700 |
| N | -1.38118500 | 1.08758500  | -0.34738900 |
| C | 2.62127100  | 0.42364300  | -0.22205300 |
| C | 3.57126800  | 0.71697300  | 0.77122900  |
| C | 2.80833800  | -0.71477200 | -1.04039100 |
| C | 4.68795900  | -0.10216900 | 0.92235500  |
| H | 3.41559200  | 1.56688700  | 1.42897600  |
| C | 3.92587300  | -1.54266100 | -0.86387800 |

|   |             |             |             |
|---|-------------|-------------|-------------|
| H | 2.17520700  | -0.85023600 | -1.92343700 |
| C | 4.86296300  | -1.23856900 | 0.12146800  |
| H | 5.42281500  | 0.13683000  | 1.68542500  |
| H | 4.07471500  | -2.39616100 | -1.51863100 |
| H | 5.73260700  | -1.87254500 | 0.26085100  |
| C | -2.62127100 | 0.42364400  | -0.22205300 |
| C | -2.80833600 | -0.71477500 | -1.04038800 |
| C | -3.57127000 | 0.71697500  | 0.77122600  |
| C | -3.92586900 | -1.54266400 | -0.86387400 |
| H | -2.17520500 | -0.85023800 | -1.92343400 |
| C | -4.68796000 | -0.10216900 | 0.92235300  |
| H | -3.41559700 | 1.56689200  | 1.42897100  |
| C | -4.86296100 | -1.23857200 | 0.12147000  |
| H | -4.07470800 | -2.39616700 | -1.51862500 |
| H | -5.42281800 | 0.13683100  | 1.68542100  |
| H | -5.73260400 | -1.87254900 | 0.26085400  |
| C | 0.00000600  | -1.09509800 | 2.12186100  |
| H | 0.88609000  | -1.68242000 | 2.41499700  |
| H | -0.00004600 | -0.18763700 | 2.74119300  |
| H | -0.88601600 | -1.68251700 | 2.41498800  |
| Y | -0.00000200 | -0.67423700 | -0.13175500 |

### La\_1\_I

E(B3LYP/BS1) = -759.934323 au

H(B3LYP/BS1) = -759.638576 au

G(B3LYP/BS1) = -759.706120 au

E(B3LYP/BS2//B3LYP/BS1, solvent = dichloromethane) = -760.616774 au

E(M06/BS2//B3LYP/BS1, solvent = dichloromethane) = -759.992508 au

|   |             |             |             |
|---|-------------|-------------|-------------|
| C | -1.23931800 | 2.47324500  | -0.32474800 |
| C | 1.23940800  | 2.47321700  | -0.32475300 |
| C | 0.00005000  | 3.11891900  | -0.33093500 |
| H | 2.13516500  | 3.09825700  | -0.29456000 |
| H | 0.00006300  | 4.20229800  | -0.32543800 |
| H | -2.13506300 | 3.09830100  | -0.29457400 |
| N | 1.41574100  | 1.15399000  | -0.36955800 |
| N | -1.41567100 | 1.15401700  | -0.36953200 |
| C | 2.68311200  | 0.55461100  | -0.19300800 |
| C | 3.54578900  | 0.87693800  | 0.87054200  |
| C | 3.01092800  | -0.53016700 | -1.03735400 |
| C | 4.71341600  | 0.14277000  | 1.06517800  |
| H | 3.28280000  | 1.68547900  | 1.54630100  |
| C | 4.18005500  | -1.27216000 | -0.82081600 |
| H | 2.43443000  | -0.69022200 | -1.95243300 |
| C | 5.02902400  | -0.93896000 | 0.23301900  |
| H | 5.37765100  | 0.40586800  | 1.88312600  |
| H | 4.43637800  | -2.08345500 | -1.49588000 |
| H | 5.93749600  | -1.50813800 | 0.40202900  |
| C | -2.68306100 | 0.55466100  | -0.19303900 |
| C | -3.01084100 | -0.53011900 | -1.03739300 |
| C | -3.54577400 | 0.87698600  | 0.87048000  |
| C | -4.17996500 | -1.27213100 | -0.82088400 |
| H | -2.43432500 | -0.69016000 | -1.95246400 |
| C | -4.71339800 | 0.14280800  | 1.06508100  |
| H | -3.28279700 | 1.68551600  | 1.54625700  |
| C | -5.02896800 | -0.93893500 | 0.23292300  |

|    |             |             |             |
|----|-------------|-------------|-------------|
| H  | -4.43625900 | -2.08343100 | -1.49595300 |
| H  | -5.37766100 | 0.40590200  | 1.88300900  |
| H  | -5.93743700 | -1.50812400 | 0.40191000  |
| C  | -0.00041900 | -1.15829600 | 2.21428300  |
| H  | 0.88340200  | -1.74308900 | 2.51991900  |
| H  | 0.00549300  | -0.23145700 | 2.80441800  |
| H  | -0.89073000 | -1.73249800 | 2.52110000  |
| La | 0.00001200  | -0.80539300 | -0.19885300 |

### Ethylene

E (B3LYP/BS1) = -78.585824 au

H(B3LYP/BS1) = -78.530603 au

G(B3LYP/BS1) = -78.556774 au

E(B3LYP/BS2//B3LYP/BS1, solvent = dichloromethane) = -78.617564 au

E(M06/BS2//B3LYP/BS1, solvent = dichloromethane) = -78.540923 au

|   |            |             |             |
|---|------------|-------------|-------------|
| C | 0.00000000 | 0.00000000  | 0.66561700  |
| C | 0.00000000 | 0.00000000  | -0.66561700 |
| H | 0.00000000 | 0.92372500  | 1.23964500  |
| H | 0.00000000 | -0.92372500 | 1.23964500  |
| H | 0.00000000 | 0.92372500  | -1.23964500 |
| H | 0.00000000 | -0.92372500 | -1.23964500 |

### Al\_1\_II

E (B3LYP/BS1) = -809.295939 au

H(B3LYP/BS1) = -808.937381 au

G(B3LYP/BS1) = -809.011604 au

E(B3LYP/BS2//B3LYP/BS1, solvent = dichloromethane) = -1050.057243 au

E(M06/BS2//B3LYP/BS1, solvent = dichloromethane) = -1049.383229 au

|   |             |             |             |
|---|-------------|-------------|-------------|
| C | 1.21553700  | 1.98459800  | -0.73832600 |
| C | -1.26468900 | 1.97053900  | -0.72629100 |
| C | -0.02873500 | 2.60481200  | -0.85457300 |
| H | -2.16168400 | 2.57381300  | -0.86238500 |
| H | -0.03603800 | 3.66065200  | -1.09577100 |
| H | 2.10500500  | 2.59752500  | -0.88108300 |
| C | 0.59097800  | -1.00709400 | 2.42096300  |
| C | -0.29797800 | 0.00360800  | 2.40811500  |
| N | -1.46495600 | 0.66983000  | -0.46642300 |
| N | 1.43006300  | 0.68595600  | -0.48136700 |
| C | -2.82145200 | 0.21588600  | -0.27999300 |
| C | -3.27624700 | -0.90691300 | -0.98225200 |
| C | -3.67507500 | 0.87918500  | 0.61234900  |
| C | -4.58317700 | -1.35805600 | -0.79426100 |
| H | -2.62506800 | -1.40168000 | -1.69700800 |
| C | -4.98265500 | 0.42431100  | 0.78827500  |
| H | -3.31451600 | 1.73797600  | 1.17243900  |
| C | -5.43837800 | -0.69488600 | 0.08871100  |
| H | -4.93556800 | -2.22157000 | -1.35014600 |
| H | -5.64103300 | 0.94230200  | 1.47910800  |
| H | -6.45499900 | -1.04817300 | 0.23019300  |
| C | 2.78974600  | 0.24111300  | -0.30536200 |
| C | 3.64532100  | 0.90528900  | 0.58496100  |
| C | 3.24606800  | -0.87775200 | -1.01354900 |
| C | 4.95587800  | 0.45546500  | 0.75206400  |
| H | 3.28374100  | 1.76011200  | 1.15036600  |

|    |             |             |             |
|----|-------------|-------------|-------------|
| C  | 4.55622900  | -1.32339400 | -0.83482900 |
| H  | 2.59324900  | -1.37214600 | -1.72736000 |
| C  | 5.41308100  | -0.65915600 | 0.04576500  |
| H  | 5.61581700  | 0.97402700  | 1.44098100  |
| H  | 4.90966900  | -2.18314700 | -1.39584000 |
| H  | 6.43221700  | -1.00788900 | 0.18026300  |
| H  | -1.36658700 | -0.17503300 | 2.51079500  |
| H  | 0.02140300  | 1.04336400  | 2.38218700  |
| H  | 0.27465100  | -2.04237500 | 2.51897700  |
| H  | 1.66315800  | -0.82477000 | 2.38089600  |
| C  | -0.02961400 | -2.42482200 | -0.51584300 |
| H  | -0.09615500 | -2.61432500 | -1.59485200 |
| H  | 0.87756900  | -2.92262500 | -0.15561200 |
| H  | -0.88868500 | -2.91974900 | -0.04846200 |
| Al | -0.00776300 | -0.51101500 | -0.14912900 |

### Ga\_1\_II

E (B3LYP/BS1) = -809.336394 au

H(B3LYP/BS1) = -808.977963 au

G(B3LYP/BS1) = -809.053037 au

E(B3LYP/BS2//B3LYP/BS1, solvent = dichloromethane) = -2732.467525 au

E(M06/BS2//B3LYP/BS1, solvent = dichloromethane) = -2731.734838 au

|   |             |             |             |
|---|-------------|-------------|-------------|
| C | 1.21803200  | 2.00818000  | -0.77923100 |
| C | -1.26739400 | 1.99669400  | -0.76294500 |
| C | -0.02823900 | 2.62334800  | -0.90178600 |
| H | -2.16078100 | 2.60138600  | -0.91508800 |
| H | -0.03484200 | 3.67441200  | -1.16324100 |
| H | 2.10434700  | 2.62085100  | -0.94079000 |
| C | 0.62289400  | -0.72830500 | 2.60002600  |
| C | -0.30352500 | 0.24225600  | 2.51620300  |
| N | -1.47756300 | 0.70428000  | -0.47903200 |
| N | 1.44209000  | 0.71707000  | -0.49968700 |
| C | -2.83243400 | 0.25102300  | -0.29369300 |
| C | -3.26992600 | -0.90019900 | -0.95986900 |
| C | -3.70343100 | 0.94298300  | 0.55872900  |
| C | -4.57733800 | -1.35119400 | -0.77706400 |
| H | -2.60396400 | -1.41842800 | -1.64416500 |
| C | -5.01151200 | 0.48770100  | 0.72985200  |
| H | -3.35615100 | 1.82268200  | 1.09393500  |
| C | -5.45043500 | -0.65926300 | 0.06560600  |
| H | -4.91607900 | -2.23727800 | -1.30521600 |
| H | -5.68341200 | 1.02724600  | 1.39048600  |
| H | -6.46755900 | -1.01240300 | 0.20368200  |
| C | 2.80036900  | 0.27283600  | -0.32602600 |
| C | 3.67460500  | 0.96881200  | 0.52036200  |
| C | 3.23812400  | -0.87768400 | -0.99376600 |
| C | 4.98544700  | 0.51820700  | 0.68342200  |
| H | 3.32748900  | 1.84745300  | 1.05744100  |
| C | 4.54852100  | -1.32355400 | -0.81943800 |
| H | 2.56969300  | -1.39844100 | -1.67397900 |
| C | 5.42445700  | -0.62765200 | 0.01704200  |
| H | 5.65965700  | 1.06074700  | 1.33924600  |
| H | 4.88721300  | -2.20870100 | -1.34918000 |
| H | 6.44379200  | -0.97678900 | 0.14881000  |
| H | -1.36428900 | 0.03101300  | 2.63400600  |



|    |             |             |             |
|----|-------------|-------------|-------------|
| H  | -0.02543100 | 1.28787500  | 2.40390600  |
| H  | 0.34680400  | -1.76468700 | 2.77670900  |
| H  | 1.68700300  | -0.51021800 | 2.53924200  |
| C  | -0.03257400 | -2.41388000 | -0.26846900 |
| H  | -0.10315200 | -2.71368400 | -1.31992500 |
| H  | 0.87971900  | -2.85056800 | 0.14765700  |
| H  | -0.89370000 | -2.83376900 | 0.26010200  |
| Ga | -0.00844800 | -0.47032300 | -0.11891400 |

## In\_1\_II

E (B3LYP/BS1) = -809.137534 au

H(B3LYP/BS1) = -808.779838 au

G(B3LYP/BS1) = -808.857590 au

E(B3LYP/BS2//B3LYP/BS1, solvent = dichloromethane) = -997.742160 au

E(M06/BS2//B3LYP/BS1, solvent = dichloromethane) = -997.095171 au

|   |             |             |             |
|---|-------------|-------------|-------------|
| C | 1.23054000  | 2.09622600  | -0.72903300 |
| C | -1.28462900 | 2.08356400  | -0.71060200 |
| C | -0.03070900 | 2.68912600  | -0.83625800 |
| H | -2.15405500 | 2.72891600  | -0.84116700 |
| H | -0.03784800 | 3.74758600  | -1.06832700 |
| H | 2.09224800  | 2.74987000  | -0.86950800 |
| C | 0.66433300  | -0.82044600 | 2.65975000  |
| C | -0.28750000 | 0.12931500  | 2.61591800  |
| N | -1.55030700 | 0.79582900  | -0.46696400 |
| N | 1.51019800  | 0.81015500  | -0.49162400 |
| C | -2.91711100 | 0.39420600  | -0.28305400 |
| C | -3.38557400 | -0.75563700 | -0.93287800 |
| C | -3.77505700 | 1.11717100  | 0.55798500  |
| C | -4.70416400 | -1.17198000 | -0.74936300 |
| H | -2.73344800 | -1.29881400 | -1.61300500 |
| C | -5.09493700 | 0.69748400  | 0.72994100  |
| H | -3.40705100 | 1.99190700  | 1.08719200  |
| C | -5.56243300 | -0.44652500 | 0.08026500  |
| H | -5.06322200 | -2.05630400 | -1.26705900 |
| H | -5.75423400 | 1.26228900  | 1.38227700  |
| H | -6.58860100 | -0.77163700 | 0.22008400  |
| C | 2.88033300  | 0.41804900  | -0.32048200 |
| C | 3.74035900  | 1.14339100  | 0.51704200  |
| C | 3.35073900  | -0.72858700 | -0.97521700 |
| C | 5.06321400  | 0.72922600  | 0.68044100  |
| H | 3.37166100  | 2.01582800  | 1.04958300  |
| C | 4.67247900  | -1.13898400 | -0.80064200 |
| H | 2.69727400  | -1.27255000 | -1.65358700 |
| C | 5.53222500  | -0.41132700 | 0.02559200  |
| H | 5.72379900  | 1.29586700  | 1.32988400  |
| H | 5.03273400  | -2.02034700 | -1.32253800 |
| H | 6.56072700  | -0.73184900 | 0.15864700  |
| H | -1.33989900 | -0.10737200 | 2.76035300  |
| H | -0.03655600 | 1.18193600  | 2.50394400  |
| H | 0.41930000  | -1.86535600 | 2.83537100  |
| H | 1.72093400  | -0.57305400 | 2.57522700  |
| C | -0.03437400 | -2.68300200 | -0.36168900 |
| H | -0.12832500 | -2.94254500 | -1.42025100 |
| H | 0.89128300  | -3.11798300 | 0.02376300  |
| H | -0.88194400 | -3.11314100 | 0.17852900  |

In -0.00919200 -0.57944400 -0.12950200

### Sc\_1\_II

E(B3LYP/BS1) = -853.760694 au

H(B3LYP/BS1) = -853.405333 au

G(B3LYP/BS1) = -853.485110 au

E(B3LYP/BS2//B3LYP/BS1, solvent = dichloromethane) = -1568.327945 au

E(M06/BS2//B3LYP/BS1, solvent = dichloromethane) = -1567.637760 au

|    |             |             |             |
|----|-------------|-------------|-------------|
| C  | -1.23518200 | 2.45968600  | 0.27092100  |
| C  | 1.23053000  | 2.46446500  | 0.26974100  |
| C  | -0.00344300 | 3.11711500  | 0.31704600  |
| H  | 2.13110100  | 3.06980800  | 0.15164500  |
| H  | -0.00563400 | 4.20028000  | 0.29997800  |
| H  | -2.13768200 | 3.06242600  | 0.15421500  |
| C  | -0.03084200 | -2.78286300 | -0.64943700 |
| C  | 0.04059600  | -1.88950500 | -1.65181600 |
| N  | 1.38854300  | 1.14025800  | 0.33603300  |
| N  | -1.38974400 | 1.13493200  | 0.33584300  |
| C  | 2.60990200  | 0.50990100  | -0.01871200 |
| C  | 3.05608600  | -0.56870300 | 0.77082000  |
| C  | 3.31245100  | 0.84656900  | -1.19044400 |
| C  | 4.18762600  | -1.29805200 | 0.38861400  |
| H  | 2.58398400  | -0.77107700 | 1.73118000  |
| C  | 4.45073600  | 0.12726100  | -1.54649900 |
| H  | 2.95349900  | 1.65730600  | -1.81808300 |
| C  | 4.88695000  | -0.95098600 | -0.76634200 |
| H  | 4.53518700  | -2.11463900 | 1.01447600  |
| H  | 4.99553100  | 0.40101500  | -2.44527600 |
| H  | 5.77167100  | -1.50874900 | -1.05678600 |
| C  | -2.61167900 | 0.50500100  | -0.01914600 |
| C  | -3.31598700 | 0.84644300  | -1.18840300 |
| C  | -3.05848600 | -0.57494800 | 0.76800600  |
| C  | -4.45689100 | 0.13104500  | -1.54397200 |
| H  | -2.95660700 | 1.65815400  | -1.81454700 |
| C  | -4.19276200 | -1.30023400 | 0.38649700  |
| H  | -2.58411400 | -0.78187200 | 1.72619500  |
| C  | -4.89410200 | -0.94802400 | -0.76577000 |
| H  | -5.00287900 | 0.40866200  | -2.44083300 |
| H  | -4.54102000 | -2.11763000 | 1.01093500  |
| H  | -5.78105200 | -1.50260000 | -1.05552000 |
| H  | 0.99719100  | -1.56288800 | -2.05632900 |
| H  | -0.85622400 | -1.49489200 | -2.12657000 |
| H  | 0.86603500  | -3.22344600 | -0.21579700 |
| H  | -0.98854300 | -3.15373600 | -0.28653500 |
| C  | 0.01069500  | -0.89477900 | 2.80215700  |
| H  | -0.88804200 | -0.57278600 | 3.34756300  |
| H  | 0.06296800  | -1.99676300 | 2.88696200  |
| H  | 0.86789400  | -0.48826400 | 3.35797100  |
| Sc | 0.00323500  | -0.37576200 | 0.72059300  |

### Y\_1\_II

E(B3LYP/BS1) = -845.254832 au

H(B3LYP/BS1) = -844.900084 au

G(B3LYP/BS1) = -844.979941 au

E(B3LYP/BS2//B3LYP/BS1, solvent = dichloromethane) = -845.969107 au

E(M06/BS2//B3LYP/BS1, solvent = dichloromethane) = -845.268910 au

|   |             |             |             |
|---|-------------|-------------|-------------|
| C | -1.24892600 | 2.61877200  | 0.24098900  |
| C | 1.22561100  | 2.62306300  | 0.22683100  |
| C | -0.01272700 | 3.27003400  | 0.27913500  |
| H | 2.11781100  | 3.24043200  | 0.09959400  |
| H | -0.01466100 | 4.35326800  | 0.25598600  |
| H | -2.14447000 | 3.23272400  | 0.12091600  |
| C | 0.02878500  | -3.04432800 | -0.86019600 |
| C | -0.00426400 | -2.14929000 | -1.86206900 |
| N | 1.39868900  | 1.30353700  | 0.30362200  |
| N | -1.41669900 | 1.29832300  | 0.32218300  |
| C | 2.60771600  | 0.67188600  | -0.06383600 |
| C | 3.01795300  | -0.44445000 | 0.69911000  |
| C | 3.32563600  | 1.00832700  | -1.22802700 |
| C | 4.12562500  | -1.20481400 | 0.30042200  |
| H | 2.56120700  | -0.63321500 | 1.67244600  |
| C | 4.43707700  | 0.25645500  | -1.59959800 |
| H | 2.99731100  | 1.84551100  | -1.83736200 |
| C | 4.83469100  | -0.85728400 | -0.84748800 |
| H | 4.44839600  | -2.04258800 | 0.91162700  |
| H | 4.99263500  | 0.53200700  | -2.49135200 |
| H | 5.69960200  | -1.43794400 | -1.15218000 |
| C | -2.62257000 | 0.66225600  | -0.04678500 |
| C | -3.34707900 | 1.00393600  | -1.20548400 |
| C | -3.02213200 | -0.46487400 | 0.70584600  |
| C | -4.45370800 | 0.24690200  | -1.58084900 |
| H | -3.02720900 | 1.84902900  | -1.80831800 |
| C | -4.12485200 | -1.23043300 | 0.30339900  |
| H | -2.56244400 | -0.65824600 | 1.67661100  |
| C | -4.84024600 | -0.87747900 | -0.83881700 |
| H | -5.01418500 | 0.52684900  | -2.46814600 |
| H | -4.43881800 | -2.07670000 | 0.90746300  |
| H | -5.70138500 | -1.46204600 | -1.14665800 |
| H | 0.90906100  | -1.77588800 | -2.32301100 |
| H | -0.94498100 | -1.81493800 | -2.29710500 |
| H | 0.97010100  | -3.43195300 | -0.47299700 |
| H | -0.88400600 | -3.47132300 | -0.44675800 |
| C | 0.07061300  | -1.07090300 | 2.84201800  |
| H | -0.90578000 | -1.09012300 | 3.34955900  |
| H | 0.48461000  | -2.09249700 | 2.93015700  |
| H | 0.71349900  | -0.41921600 | 3.45306200  |
| Y | -0.00290900 | -0.44853400 | 0.61277500  |

## La\_1\_II

E(B3LYP/BS1) = -838.542156 au

H(B3LYP/BS1) = -838.187817 au

G(B3LYP/BS1) = -838.270089 au

E(B3LYP/BS2//B3LYP/BS1, solvent = dichloromethane) = -839.233096 au

E(M06/BS2//B3LYP/BS1, solvent = dichloromethane) = -838.538730 au

|   |             |            |            |
|---|-------------|------------|------------|
| C | -1.28391200 | 2.72574700 | 0.15354400 |
| C | 1.19898400  | 2.74859600 | 0.15896400 |
| C | -0.04815600 | 3.37956300 | 0.17462600 |
| H | 2.08075400  | 3.38373600 | 0.04214700 |
| H | -0.05791900 | 4.46205500 | 0.12623800 |

|    |             |             |             |
|----|-------------|-------------|-------------|
| H  | -2.17639300 | 3.34482000  | 0.03165400  |
| C  | 0.18992600  | -3.36328900 | -1.15149200 |
| C  | 0.17533500  | -2.48487200 | -2.16629200 |
| N  | 1.40353700  | 1.43687000  | 0.26823800  |
| N  | -1.46448900 | 1.41094500  | 0.26298800  |
| C  | 2.64826600  | 0.84864000  | -0.04175400 |
| C  | 3.09920900  | -0.20976800 | 0.77947100  |
| C  | 3.37761200  | 1.16781200  | -1.20463300 |
| C  | 4.25794000  | -0.92289000 | 0.44463000  |
| H  | 2.62278300  | -0.38234600 | 1.74629800  |
| C  | 4.53797200  | 0.46289600  | -1.51525900 |
| H  | 3.02161400  | 1.95901500  | -1.85845800 |
| C  | 4.97731800  | -0.58953700 | -0.70171100 |
| H  | 4.60980000  | -1.71251700 | 1.10227000  |
| H  | 5.10040100  | 0.72826900  | -2.40586500 |
| H  | 5.88086500  | -1.13401800 | -0.95724500 |
| C  | -2.69573900 | 0.79943100  | -0.05467600 |
| C  | -3.42593300 | 1.10748500  | -1.21995500 |
| C  | -3.12968200 | -0.27028200 | 0.76116700  |
| C  | -4.57050700 | 0.38055600  | -1.53815500 |
| H  | -3.08257000 | 1.90715600  | -1.87020700 |
| C  | -4.27264000 | -1.00512400 | 0.41905900  |
| H  | -2.65642800 | -0.43455400 | 1.73102200  |
| C  | -4.99288300 | -0.68270200 | -0.72981500 |
| H  | -5.13363200 | 0.63720300  | -2.43086600 |
| H  | -4.61210800 | -1.80329900 | 1.07284800  |
| H  | -5.88404500 | -1.24439500 | -0.99144200 |
| H  | 1.09526700  | -2.07657900 | -2.58202300 |
| H  | -0.75049400 | -2.20427500 | -2.66583600 |
| H  | 1.12253200  | -3.70310300 | -0.70317100 |
| H  | -0.72355800 | -3.83011600 | -0.78593900 |
| C  | 0.02938800  | -1.22283700 | 2.81694000  |
| H  | -0.90108800 | -1.73892300 | 3.10633000  |
| H  | 0.84963600  | -1.93893200 | 2.99721500  |
| H  | 0.16580300  | -0.39412400 | 3.52666900  |
| La | -0.01016800 | -0.54344400 | 0.45161100  |

### TS<sub>Al-1</sub>

E(B3LYP/BS1) = -809.245952 au

H(B3LYP/BS1) = -808.888712 au

G(B3LYP/BS1) = -808.959612 au

E(B3LYP/BS2//B3LYP/BS1, solvent = dichloromethane) = -1050.008640 au

E(M06/BS2//B3LYP/BS1, solvent = dichloromethane) = -1049.338756 au

|    |             |             |             |
|----|-------------|-------------|-------------|
| C  | -1.24035000 | 2.10397900  | -0.59218600 |
| C  | 1.24033100  | 2.10400300  | -0.59221400 |
| C  | -0.00001700 | 2.72960300  | -0.72435700 |
| H  | 2.13405500  | 2.72129900  | -0.68210400 |
| H  | -0.00003000 | 3.79208000  | -0.93359200 |
| H  | -2.13408500 | 2.72125900  | -0.68207600 |
| C  | 0.00033900  | -2.64951800 | 0.36070800  |
| C  | 0.00007600  | -2.20651100 | -1.01018600 |
| Al | 0.00000800  | -0.39569700 | -0.12480600 |
| C  | -0.00030400 | -1.03595100 | 1.88046800  |
| H  | 0.90318800  | -0.46332500 | 2.13887300  |
| H  | -0.90532200 | -0.46577300 | 2.13883200  |

|   |             |             |             |
|---|-------------|-------------|-------------|
| H | 0.00101800  | -1.90670800 | 2.53404900  |
| H | -0.91371200 | -3.02968800 | 0.80678000  |
| H | 0.91471500  | -3.02920600 | 0.80652200  |
| N | 1.45270700  | 0.80049900  | -0.36299700 |
| N | -1.45271000 | 0.80047400  | -0.36295300 |
| C | -2.80926400 | 0.36198700  | -0.13919400 |
| C | -3.54079500 | 0.86810700  | 0.94287700  |
| C | -3.38423800 | -0.58471100 | -0.99572600 |
| C | -4.84714900 | 0.42771800  | 1.16173600  |
| H | -3.08480200 | 1.59458300  | 1.61008800  |
| C | -4.68964900 | -1.02266000 | -0.76604400 |
| H | -2.83017000 | -0.93881800 | -1.86023500 |
| C | -5.42179700 | -0.51964300 | 0.31186800  |
| H | -5.41237200 | 0.82353100  | 2.00011700  |
| H | -5.13856300 | -1.74591300 | -1.44022900 |
| H | -6.43747700 | -0.86118200 | 0.48577000  |
| C | 2.80926000  | 0.36202200  | -0.13920600 |
| C | 3.54077800  | 0.86817800  | 0.94285700  |
| C | 3.38424600  | -0.58471200 | -0.99569400 |
| C | 4.84712400  | 0.42779000  | 1.16175500  |
| H | 3.08478100  | 1.59468400  | 1.61003400  |
| C | 4.68964900  | -1.02266000 | -0.76597300 |
| H | 2.83019400  | -0.93884100 | -1.86020400 |
| C | 5.42178100  | -0.51960800 | 0.31193400  |
| H | 5.41233500  | 0.82363200  | 2.00013100  |
| H | 5.13857100  | -1.74593900 | -1.44012400 |
| H | 6.43745500  | -0.86114600 | 0.48586700  |
| H | -0.91608900 | -2.39597400 | -1.56732300 |
| H | 0.91610900  | -2.39578300 | -1.56760500 |

**TS<sub>Ga-1</sub>**

E(B3LYP/BS1) = -809.275337 au

H(B3LYP/BS1) = -808.918409 au

G(B3LYP/BS1) = -808.990540 au

E(B3LYP/BS2//B3LYP/BS1, solvent = dichloromethane) = -2732.402040 au

E(M06/BS2//B3LYP/BS1, solvent = dichloromethane) = -2731.674061 au

|   |             |             |             |
|---|-------------|-------------|-------------|
| C | -1.24543700 | 2.13950000  | -0.55572800 |
| C | 1.24452200  | 2.14012700  | -0.55956300 |
| C | -0.00083500 | 2.76126100  | -0.67360300 |
| H | 2.13228500  | 2.76597300  | -0.64935300 |
| H | -0.00145300 | 3.82687100  | -0.86648500 |
| H | -2.13381000 | 2.76465700  | -0.64410100 |
| C | 0.02177700  | -2.58008900 | 0.51327200  |
| C | -0.00047700 | -2.21449900 | -0.88569200 |
| C | -0.01433000 | -0.89473700 | 1.98747400  |
| H | 0.83204100  | -0.23672700 | 2.22836800  |
| H | -0.96887900 | -0.40936200 | 2.22687800  |
| H | 0.07678400  | -1.75566400 | 2.64817500  |
| H | -0.88232600 | -2.94272800 | 0.99231900  |
| H | 0.94863400  | -2.91968600 | 0.96480500  |
| N | 1.47459700  | 0.83766200  | -0.35498900 |
| N | -1.47461100 | 0.83703600  | -0.34951700 |
| C | -2.83103400 | 0.39661200  | -0.14690600 |
| C | -3.58855800 | 0.91578600  | 0.91070400  |
| C | -3.38319200 | -0.56378100 | -1.00335600 |

|    |             |             |             |
|----|-------------|-------------|-------------|
| C  | -4.89908100 | 0.47550300  | 1.10415700  |
| H  | -3.14950000 | 1.65096900  | 1.57964000  |
| C  | -4.69251800 | -1.00133700 | -0.79888000 |
| H  | -2.80693400 | -0.92921300 | -1.84856400 |
| C  | -5.45145800 | -0.48455700 | 0.25404600  |
| H  | -5.48457000 | 0.88095900  | 1.92381200  |
| H  | -5.12382600 | -1.73514400 | -1.47315800 |
| H  | -6.47030600 | -0.82603200 | 0.40842600  |
| C  | 2.83068100  | 0.39806100  | -0.14990800 |
| C  | 3.59066900  | 0.92783100  | 0.90073500  |
| C  | 3.38028800  | -0.57303000 | -0.99601200 |
| C  | 4.90055500  | 0.48747100  | 1.09760700  |
| H  | 3.15387800  | 1.67091700  | 1.56240100  |
| C  | 4.68903900  | -1.01063800 | -0.78812800 |
| H  | 2.80280500  | -0.94648900 | -1.83684400 |
| C  | 5.45019000  | -0.48329900 | 0.25793500  |
| H  | 5.48767900  | 0.90103800  | 1.91202300  |
| H  | 5.11824600  | -1.75276100 | -1.45460300 |
| H  | 6.46857600  | -0.82489700 | 0.41507100  |
| H  | -0.92311600 | -2.44031800 | -1.41701400 |
| H  | 0.90882200  | -2.43093900 | -1.44313800 |
| Ga | 0.00033100  | -0.35649800 | -0.10019500 |

### TS<sub>In-1</sub>

E(B3LYP/BS1) = -809.069705 au

H(B3LYP/BS1) = -808.713784 au

G(B3LYP/BS1) = -808.788187 au

E(B3LYP/BS2//B3LYP/BS1, solvent = dichloromethane) = -997.665471 au

E(M06/BS2//B3LYP/BS1, solvent = dichloromethane) = -997.022957 au

|   |             |             |             |
|---|-------------|-------------|-------------|
| C | -1.26067200 | 2.22019100  | -0.52140100 |
| C | 1.26072200  | 2.22019100  | -0.52139000 |
| C | 0.00002600  | 2.81578900  | -0.63022700 |
| H | 2.12254800  | 2.88363400  | -0.60253200 |
| H | 0.00002600  | 3.88403400  | -0.81163500 |
| H | -2.12249600 | 2.88363600  | -0.60254600 |
| C | -0.00007900 | -2.82936400 | 0.52177400  |
| C | -0.00004700 | -2.49278800 | -0.88569500 |
| C | -0.00026500 | -1.16650600 | 2.08509400  |
| H | 0.90315900  | -0.60108200 | 2.35331900  |
| H | -0.90423100 | -0.60195000 | 2.35326800  |
| H | 0.00026500  | -2.06160400 | 2.70512400  |
| H | -0.91524500 | -3.17851500 | 0.98904200  |
| H | 0.91508100  | -3.17852900 | 0.98904300  |
| N | 1.54846600  | 0.92716400  | -0.33776500 |
| N | -1.54842000 | 0.92716600  | -0.33777400 |
| C | -2.91524400 | 0.53878500  | -0.13372000 |
| C | -3.71327900 | 1.19720800  | 0.81167300  |
| C | -3.44378900 | -0.52808100 | -0.87266700 |
| C | -5.03646000 | 0.79583500  | 1.00124800  |
| H | -3.29356200 | 2.00298600  | 1.40731100  |
| C | -4.76531000 | -0.92715600 | -0.67122500 |
| H | -2.83751600 | -1.00936500 | -1.63644500 |
| C | -5.56463000 | -0.26617100 | 0.26463800  |
| H | -5.65025600 | 1.30894300  | 1.73547500  |

|    |             |             |             |
|----|-------------|-------------|-------------|
| H  | -5.17434000 | -1.74420200 | -1.25800900 |
| H  | -6.59305800 | -0.57757600 | 0.41861600  |
| C  | 2.91528500  | 0.53876900  | -0.13370500 |
| C  | 3.71334200  | 1.19721600  | 0.81165300  |
| C  | 3.44380000  | -0.52814200 | -0.87260600 |
| C  | 5.03651500  | 0.79581900  | 1.00123700  |
| H  | 3.29364900  | 2.00302700  | 1.40726200  |
| C  | 4.76531300  | -0.92724100 | -0.67115500 |
| H  | 2.83751300  | -1.00944500 | -1.63636200 |
| C  | 5.56465400  | -0.26623300 | 0.26467300  |
| H  | 5.65032700  | 1.30894500  | 1.73543800  |
| H  | 5.17431900  | -1.74432400 | -1.25790500 |
| H  | 6.59307600  | -0.57765700 | 0.41865900  |
| H  | -0.91559900 | -2.72575200 | -1.42704700 |
| H  | 0.91549400  | -2.72584600 | -1.42702600 |
| In | 0.00002500  | -0.44588600 | -0.12680600 |

### TS<sub>Sc-1</sub>

E(B3LYP/BS1) = -853.742519 au

H(B3LYP/BS1) = -853.387978 au

G(B3LYP/BS1) = -853.462542 au

E(B3LYP/BS2//B3LYP/BS1, solvent = dichloromethane) = -1568.311960 au

E(M06/BS2//B3LYP/BS1, solvent = dichloromethane) = -1567.623237 au

|   |             |             |             |
|---|-------------|-------------|-------------|
| C | -1.25142400 | -1.97307100 | 1.19753400  |
| C | 1.24179800  | -1.98837800 | 1.20293900  |
| C | -0.00835000 | -2.49659100 | 1.56782700  |
| H | 2.11768600  | -2.59887200 | 1.43094900  |
| H | -0.01574500 | -3.43286000 | 2.11359100  |
| H | -2.13390900 | -2.57350300 | 1.42680600  |
| C | 0.08024500  | 3.18932100  | 0.71770200  |
| C | 0.01442900  | 2.32941800  | 1.81625700  |
| C | -0.03800200 | 2.15554500  | -1.30865700 |
| H | 0.62504400  | 1.38973400  | -1.78221500 |
| H | -1.08536600 | 1.94721800  | -1.58787400 |
| H | 0.24634400  | 3.10395200  | -1.76118000 |
| H | -0.79939700 | 3.73270300  | 0.38742400  |
| H | 1.02649000  | 3.63240400  | 0.42496000  |
| N | 1.46537000  | -0.82752800 | 0.57396200  |
| N | -1.46477100 | -0.81342400 | 0.56211800  |
| C | -2.75297200 | -0.54981800 | 0.00309100  |
| C | -3.39182200 | -1.48453100 | -0.82694200 |
| C | -3.35749700 | 0.69624700  | 0.23774000  |
| C | -4.62386200 | -1.17478900 | -1.40107800 |
| H | -2.91129500 | -2.43643000 | -1.03443900 |
| C | -4.58481300 | 1.00339400  | -0.35308000 |
| H | -2.90060400 | 1.39853400  | 0.93328600  |
| C | -5.22065500 | 0.06851500  | -1.17164300 |
| H | -5.11420400 | -1.90366800 | -2.03942100 |
| H | -5.05159600 | 1.96372100  | -0.15537900 |
| H | -6.17753800 | 0.30508900  | -1.62622800 |
| C | 2.74874700  | -0.56457800 | 0.00740700  |
| C | 3.38979000  | -1.50129900 | -0.81919600 |
| C | 3.34484300  | 0.68867900  | 0.22738900  |
| C | 4.61576300  | -1.18659200 | -1.40279900 |
| H | 2.91544800  | -2.45849900 | -1.01619700 |

|    |             |             |             |
|----|-------------|-------------|-------------|
| C  | 4.56587400  | 1.00085400  | -0.37430400 |
| H  | 2.88950100  | 1.39129500  | 0.92389400  |
| C  | 5.20390100  | 0.06387900  | -1.18817900 |
| H  | 5.10851900  | -1.91706400 | -2.03746500 |
| H  | 5.02628200  | 1.96645700  | -0.18784400 |
| H  | 6.15603900  | 0.30384000  | -1.65085600 |
| H  | -0.92729700 | 2.22092500  | 2.35611000  |
| H  | 0.91428200  | 2.14466400  | 2.40527000  |
| Sc | 0.01100800  | 0.64999000  | 0.27296200  |

**TS<sub>Y-1</sub>**

E(B3LYP/BS1) = -845.231227 au

H(B3LYP/BS1) = -844.877508 au

G(B3LYP/BS1) = -844.953211 au

E(B3LYP/BS2//B3LYP/BS1, solvent = dichloromethane) = -845.942979 au

E(M06/BS2//B3LYP/BS1, solvent = dichloromethane) = -845.245695 au

|   |             |             |             |
|---|-------------|-------------|-------------|
| C | -1.24354900 | 2.47712600  | -0.81671500 |
| C | 1.24477400  | 2.48077400  | -0.82051200 |
| C | -0.00031500 | 3.08267000  | -1.02552200 |
| H | 2.12875400  | 3.11794300  | -0.90019100 |
| H | -0.00243200 | 4.13017300  | -1.30316100 |
| H | -2.12906600 | 3.11229000  | -0.89551600 |
| C | 0.01762100  | -3.29220800 | -0.46981800 |
| C | 0.00014500  | -2.54141100 | -1.64903700 |
| C | -0.02495000 | -2.12523900 | 1.52684700  |
| H | 0.80858000  | -1.50767100 | 1.93470900  |
| H | -0.99018300 | -1.68663200 | 1.85492500  |
| H | 0.05764700  | -3.09043800 | 2.02480800  |
| H | -0.88779700 | -3.76882200 | -0.10874700 |
| H | 0.94046400  | -3.74375000 | -0.12134400 |
| N | 1.44811800  | 1.19468400  | -0.52515800 |
| N | -1.44444500 | 1.19147600  | -0.51853100 |
| C | -2.71141200 | 0.73579000  | -0.06833200 |
| C | -3.43158700 | 1.38999600  | 0.94779200  |
| C | -3.19486100 | -0.48676900 | -0.57568000 |
| C | -4.61544600 | 0.83471300  | 1.42835600  |
| H | -3.04874300 | 2.31713800  | 1.36486600  |
| C | -4.37576900 | -1.04451600 | -0.07306600 |
| H | -2.70607900 | -0.94449600 | -1.43628100 |
| C | -5.08650800 | -0.38553800 | 0.92909900  |
| H | -5.16900900 | 1.35064000  | 2.20736800  |
| H | -4.74986900 | -1.97591500 | -0.48762500 |
| H | -6.00649500 | -0.81253300 | 1.31556800  |
| C | 2.71213100  | 0.73752600  | -0.07105600 |
| C | 3.43880700  | 1.39749300  | 0.93693900  |
| C | 3.18560500  | -0.49503600 | -0.56443900 |
| C | 4.61927500  | 0.83886600  | 1.42148400  |
| H | 3.06368400  | 2.33199700  | 1.34441900  |
| C | 4.36300200  | -1.05621300 | -0.05697600 |
| H | 2.69493900  | -0.95730000 | -1.42176600 |
| C | 5.08040400  | -0.39086800 | 0.93591000  |
| H | 5.17821500  | 1.35965900  | 2.19339000  |
| H | 4.72930200  | -1.99513000 | -0.46139100 |
| H | 5.99789800  | -0.82003900 | 1.32583000  |
| H | -0.92646300 | -2.47902900 | -2.22125400 |



|   |            |             |             |
|---|------------|-------------|-------------|
| H | 0.91487700 | -2.46336700 | -2.23845400 |
| Y | 0.00543200 | -0.54155800 | -0.21220400 |

**TS<sub>La-1</sub>**

E(B3LYP/BS1) = -838.513125 au

H(B3LYP/BS1) = -838.159816 au

G(B3LYP/BS1) = -838.236413 au

E(B3LYP/BS2//B3LYP/BS1, solvent = dichloromethane) = -839.204119 au

E(M06/BS2//B3LYP/BS1, solvent = dichloromethane) = -838.513872 au

|    |             |             |             |
|----|-------------|-------------|-------------|
| C  | -1.25305900 | 2.72676200  | -0.62729800 |
| C  | 1.24032600  | 2.72874000  | -0.62807700 |
| C  | -0.00664400 | 3.34985400  | -0.75515400 |
| H  | 2.12146000  | 3.37543700  | -0.65571500 |
| H  | -0.00743200 | 4.42157000  | -0.91641700 |
| H  | -2.13531600 | 3.37201400  | -0.65467400 |
| C  | 0.04948100  | -3.49171600 | -0.27625700 |
| C  | 0.02446800  | -2.79407700 | -1.48927000 |
| C  | -0.01038800 | -2.31327100 | 1.68848000  |
| H  | 0.82090200  | -1.70404100 | 2.10895800  |
| H  | -0.97358000 | -1.87682600 | 2.02489600  |
| H  | 0.06677700  | -3.28413900 | 2.17781300  |
| H  | -0.84897200 | -3.97777000 | 0.08945000  |
| H  | 0.97707500  | -3.92753700 | 0.07963800  |
| N  | 1.44862900  | 1.42098800  | -0.47902300 |
| N  | -1.45787300 | 1.41911200  | -0.47800500 |
| C  | -2.71871300 | 0.90261000  | -0.10950500 |
| C  | -3.49153400 | 1.43661000  | 0.94024200  |
| C  | -3.14333300 | -0.29595300 | -0.72619300 |
| C  | -4.66317700 | 0.79723300  | 1.33935200  |
| H  | -3.15819900 | 2.34013500  | 1.44285100  |
| C  | -4.31479600 | -0.93824500 | -0.30513800 |
| H  | -2.63505500 | -0.64666200 | -1.62688100 |
| C  | -5.07423500 | -0.39459500 | 0.72935200  |
| H  | -5.25609200 | 1.22510200  | 2.14255200  |
| H  | -4.64317900 | -1.84236900 | -0.80937700 |
| H  | -5.98551800 | -0.88635000 | 1.05433400  |
| C  | 2.71108100  | 0.90953100  | -0.10792600 |
| C  | 3.47953000  | 1.44768500  | 0.94300900  |
| C  | 3.14266500  | -0.28702500 | -0.72345700 |
| C  | 4.65378000  | 0.81445700  | 1.34410000  |
| H  | 3.14098800  | 2.34980100  | 1.44467700  |
| C  | 4.31647600  | -0.92342800 | -0.30011700 |
| H  | 2.63718200  | -0.64087900 | -1.62432600 |
| C  | 5.07167400  | -0.37557000 | 0.73519200  |
| H  | 5.24338100  | 1.24564500  | 2.14796000  |
| H  | 4.64993600  | -1.82624700 | -0.80335500 |
| H  | 5.98491800  | -0.86265100 | 1.06171300  |
| H  | -0.90168800 | -2.77686300 | -2.06596600 |
| H  | 0.93967900  | -2.73689300 | -2.08078600 |
| La | -0.00095100 | -0.54418900 | -0.13800300 |

**Al 1 III**

E(B3LYP/BS1) = -809.3138271 au

H(B3LYP/BS1) = -808.952460 au

G(B3LYP/BS1) = -809.025035 au

E(B3LYP/BS2//B3LYP/BS1, solvent = dichloromethane) = -1050.073068 au

E(M06/BS2//B3LYP/BS1, solvent = dichloromethane) = -1049.397146 au

|    |             |             |             |
|----|-------------|-------------|-------------|
| C  | 1.24582500  | -2.35735800 | -0.57219400 |
| C  | -1.23026800 | -2.36225200 | -0.57085900 |
| C  | 0.00890700  | -2.97988700 | -0.73040400 |
| H  | -2.12744000 | -2.96019800 | -0.72464000 |
| H  | 0.01081900  | -4.02565400 | -1.01237200 |
| H  | 2.14510500  | -2.95179900 | -0.72717800 |
| C  | 0.00283700  | 1.94708000  | 0.68555900  |
| H  | -0.85550500 | 2.08004000  | 1.35908900  |
| H  | 0.89762100  | 2.09589700  | 1.30605400  |
| N  | -1.43105300 | -1.07142700 | -0.25075100 |
| N  | 1.44190900  | -1.06585500 | -0.25193300 |
| C  | 2.79886000  | -0.60835900 | -0.05452500 |
| C  | 3.65202300  | -1.28370300 | 0.82648900  |
| C  | 3.24228900  | 0.53004900  | -0.73644000 |
| C  | 4.95535800  | -0.82145400 | 1.01073700  |
| H  | 3.29215700  | -2.14749600 | 1.37853600  |
| C  | 4.54534800  | 0.98873000  | -0.53945000 |
| H  | 2.58826500  | 1.03137400  | -1.44610300 |
| C  | 5.40334700  | 0.31374000  | 0.33142100  |
| H  | 5.61613700  | -1.34446700 | 1.69521200  |
| H  | 4.89149200  | 1.86591100  | -1.07731300 |
| H  | 6.41698900  | 0.67191900  | 0.48141200  |
| C  | -2.78984900 | -0.61919500 | -0.05318200 |
| C  | -3.63843500 | -1.29416300 | 0.83247600  |
| C  | -3.23971800 | 0.51342500  | -0.74039200 |
| C  | -4.94362800 | -0.83698200 | 1.01644700  |
| H  | -3.27370600 | -2.15367200 | 1.38800900  |
| C  | -4.54457600 | 0.96710100  | -0.54371700 |
| H  | -2.58903100 | 1.01373400  | -1.45370400 |
| C  | -5.39796000 | 0.29266300  | 0.33208600  |
| H  | -5.60098400 | -1.35962800 | 1.70448600  |
| H  | -4.89570400 | 1.83978300  | -1.08566000 |
| H  | -6.41303300 | 0.64686500  | 0.48185200  |
| C  | -0.04058300 | 3.03043800  | -0.42352500 |
| C  | -0.03168900 | 4.44931700  | 0.15681700  |
| H  | 0.87166400  | 4.62561500  | 0.75204100  |
| H  | -0.06090300 | 5.19949000  | -0.64077100 |
| H  | -0.89894100 | 4.61449600  | 0.80642700  |
| H  | -0.93854800 | 2.89980700  | -1.04210200 |
| H  | 0.81679300  | 2.91243800  | -1.09989100 |
| Al | 0.00324900  | 0.09164500  | 0.08548700  |

### Ga\_1\_III

E(B3LYP/BS1) = -809.3590473 au

H(B3LYP/BS1) = -808.997833 au

G(B3LYP/BS1) = -809.071091 au

E(B3LYP/BS2//B3LYP/BS1, solvent = dichloromethane) = -2732.48957 au

E(M06/BS2//B3LYP/BS1, solvent = dichloromethane) = -2731.755407 au

|   |             |             |             |
|---|-------------|-------------|-------------|
| C | 1.24720700  | -2.36490400 | -0.57504700 |
| C | -1.23300400 | -2.36947700 | -0.57373400 |
| C | 0.00813300  | -2.98366200 | -0.73182200 |
| H | -2.12706700 | -2.97157400 | -0.72928600 |
| H | 0.00990200  | -4.02946100 | -1.01382500 |

|    |             |             |             |
|----|-------------|-------------|-------------|
| H  | 2.14322700  | -2.96374100 | -0.73185600 |
| C  | 0.00347800  | 1.95438000  | 0.68352000  |
| H  | -0.85740400 | 2.07338600  | 1.35350400  |
| H  | 0.90200200  | 2.08880100  | 1.29870800  |
| N  | -1.44305300 | -1.08136800 | -0.25558500 |
| N  | 1.45283000  | -1.07616900 | -0.25668700 |
| C  | 2.80895300  | -0.62133100 | -0.06232300 |
| C  | 3.66965600  | -1.31001400 | 0.80087100  |
| C  | 3.24770100  | 0.52641500  | -0.73159100 |
| C  | 4.97513300  | -0.85158700 | 0.97981800  |
| H  | 3.31388700  | -2.18049100 | 1.34491000  |
| C  | 4.55293600  | 0.98074900  | -0.54044100 |
| H  | 2.58678800  | 1.03850000  | -1.42691700 |
| C  | 5.41841600  | 0.29246500  | 0.31262200  |
| H  | 5.64120300  | -1.38468600 | 1.65127400  |
| H  | 4.89510400  | 1.86517900  | -1.06894400 |
| H  | 6.43380300  | 0.64744000  | 0.45835400  |
| C  | -2.80097800 | -0.63163400 | -0.06101800 |
| C  | -3.65687700 | -1.31960500 | 0.80743800  |
| C  | -3.24629600 | 0.51005400  | -0.73614700 |
| C  | -4.96414100 | -0.86612900 | 0.98623700  |
| H  | -3.29612000 | -2.18561900 | 1.35530700  |
| C  | -4.55324900 | 0.95950000  | -0.54519100 |
| H  | -2.58891000 | 1.02076400  | -1.43568900 |
| C  | -5.41389200 | 0.27214000  | 0.31348200  |
| H  | -5.62661700 | -1.39857900 | 1.66174900  |
| H  | -4.90051900 | 1.83923400  | -1.07819200 |
| H  | -6.43064300 | 0.62324600  | 0.45909800  |
| C  | -0.04063200 | 3.02628100  | -0.43155700 |
| C  | -0.03035700 | 4.44635500  | 0.14707000  |
| H  | 0.87389600  | 4.62431700  | 0.74024500  |
| H  | -0.06010900 | 5.19330500  | -0.65326100 |
| H  | -0.89701400 | 4.61419400  | 0.79662800  |
| H  | -0.93969000 | 2.89290200  | -1.04716300 |
| H  | 0.81652200  | 2.90449400  | -1.10681500 |
| Ga | 0.00278100  | 0.09326400  | 0.08080500  |

### **In 1 III**

E(B3LYP/BS1) = -809.1574609 au

H(B3LYP/BS1) = -808.796877 au

G(B3LYP/BS1) = -808.871497 au

E(B3LYP/BS2//B3LYP/BS1, solvent = dichloromethane) = -997.7635023 au

E(M06/BS2//B3LYP/BS1, solvent = dichloromethane) = -997.114257 au

|   |             |             |             |
|---|-------------|-------------|-------------|
| C | 1.28837300  | -2.41362300 | -0.56356700 |
| C | -1.22014200 | -2.43700400 | -0.56177600 |
| C | 0.03957800  | -3.02107000 | -0.70866300 |
| H | -2.08558200 | -3.08089100 | -0.71989300 |
| H | 0.04918500  | -4.06983100 | -0.98105100 |
| H | 2.16527300  | -3.04140600 | -0.72326000 |
| C | -0.01210300 | 2.26106000  | 0.72335000  |
| H | -0.83862900 | 2.36387300  | 1.43547700  |
| H | 0.91748200  | 2.43006800  | 1.27783400  |
| N | -1.49428700 | -1.15993000 | -0.26254400 |
| N | 1.53952100  | -1.13174600 | -0.26427400 |
| C | 2.90621700  | -0.71708300 | -0.08969600 |

|    |             |             |             |
|----|-------------|-------------|-------------|
| C  | 3.78049800  | -1.44646100 | 0.72676000  |
| C  | 3.35019800  | 0.44991600  | -0.72425300 |
| C  | 5.09628400  | -1.01235000 | 0.89068700  |
| H  | 3.42641900  | -2.33054000 | 1.24939600  |
| C  | 4.66549900  | 0.88057800  | -0.54874500 |
| H  | 2.68347900  | 0.99538800  | -1.38976500 |
| C  | 5.54148700  | 0.14962000  | 0.25670000  |
| H  | 5.76968700  | -1.57884600 | 1.52671500  |
| H  | 5.00737800  | 1.77914000  | -1.05320100 |
| H  | 6.56494000  | 0.48518500  | 0.39137900  |
| C  | -2.86822500 | -0.77004800 | -0.08735000 |
| C  | -3.72813600 | -1.51276900 | 0.73226500  |
| C  | -3.33419200 | 0.38653400  | -0.72512400 |
| C  | -5.05144600 | -1.10210900 | 0.89639800  |
| H  | -3.35747600 | -2.38866900 | 1.25718600  |
| C  | -4.65692900 | 0.79368400  | -0.54963300 |
| H  | -2.67799800 | 0.94161600  | -1.39306300 |
| C  | -5.51850300 | 0.04952100  | 0.25926000  |
| H  | -5.71374300 | -1.67880400 | 1.53491600  |
| H  | -5.01575400 | 1.68416400  | -1.05666000 |
| H  | -6.54775000 | 0.36680800  | 0.39409800  |
| C  | -0.15556000 | 3.27036400  | -0.43469400 |
| C  | -0.16476100 | 4.71583700  | 0.08072400  |
| H  | 0.76380400  | 4.95145700  | 0.61278600  |
| H  | -0.26528000 | 5.42242300  | -0.75003400 |
| H  | -1.00042400 | 4.88426000  | 0.76935900  |
| H  | -1.08238900 | 3.07964300  | -0.99145600 |
| H  | 0.66758200  | 3.14754600  | -1.15097200 |
| In | 0.01029200  | 0.21493000  | 0.12269500  |

### Sc\_1\_III

E(B3LYP/BS1) = -853.773258 au

H(B3LYP/BS1) = -853.415752 au

G(B3LYP/BS1) = -853.489188 au

E(B3LYP/BS2//B3LYP/BS1, solvent = dichloromethane) = -1568.348408 au

E(M06/BS2//B3LYP/BS1, solvent = dichloromethane) = -1567.664409 au

|   |             |             |             |
|---|-------------|-------------|-------------|
| C | -1.06545500 | -2.75700000 | -0.17495800 |
| C | 1.39062300  | -2.65387700 | -0.19148100 |
| C | 0.18829100  | -3.35042700 | -0.34184600 |
| H | 2.32920600  | -3.19621900 | -0.32086700 |
| H | 0.23106500  | -4.40662200 | -0.57721700 |
| H | -1.95735000 | -3.37567200 | -0.29144600 |
| C | -0.03145200 | 1.34239900  | -1.46045000 |
| H | 0.80448100  | 1.27659100  | -2.16264000 |
| H | -0.97622200 | 1.22909100  | -2.00704700 |
| N | 1.45954500  | -1.36325900 | 0.12991900  |
| N | -1.23688700 | -1.47615100 | 0.14852600  |
| C | -2.48796600 | -0.82560800 | 0.22392900  |
| C | -3.48142300 | -0.91918600 | -0.76558200 |
| C | -2.64603300 | 0.09845700  | 1.28030700  |
| C | -4.61669800 | -0.11744500 | -0.67900200 |
| H | -3.34739900 | -1.60151400 | -1.59978600 |
| C | -3.78202100 | 0.91645800  | 1.34251500  |
| H | -1.96302900 | 0.06396500  | 2.13532300  |
| C | -4.76560300 | 0.80991900  | 0.36133000  |

|    |             |             |             |
|----|-------------|-------------|-------------|
| H  | -5.38805700 | -0.20318900 | -1.43868200 |
| H  | -3.90639000 | 1.60505000  | 2.17277200  |
| H  | -5.65138600 | 1.43524800  | 0.40830200  |
| C  | 2.65487300  | -0.61253400 | 0.18588900  |
| C  | 3.63605600  | -0.62630300 | -0.81997800 |
| C  | 2.75725500  | 0.31893800  | 1.24225500  |
| C  | 4.70665800  | 0.26142500  | -0.74924400 |
| H  | 3.54173200  | -1.31546400 | -1.65398300 |
| C  | 3.82686900  | 1.22254500  | 1.28893700  |
| H  | 2.09116700  | 0.23163100  | 2.10672400  |
| C  | 4.79986600  | 1.19480900  | 0.29194000  |
| H  | 5.46955900  | 0.23791700  | -1.52182400 |
| H  | 3.91055000  | 1.91747300  | 2.11903600  |
| H  | 5.63462000  | 1.88751400  | 0.32661200  |
| C  | -0.00196400 | 2.61538300  | -0.60410000 |
| C  | -1.09671000 | 3.64816500  | -0.90248000 |
| H  | -2.09283200 | 3.20028700  | -0.81629100 |
| H  | -1.04207900 | 4.50138300  | -0.21802200 |
| H  | -0.98166000 | 4.02113600  | -1.92487700 |
| H  | 0.98840300  | 3.08242700  | -0.63746000 |
| H  | -0.12228000 | 2.37424700  | 0.50547200  |
| Sc | 0.04563300  | 0.16732700  | 0.29899600  |

### Y\_1\_III

E(B3LYP/BS1) = -845.266672 au

H(B3LYP/BS1) = -844.909465 au

G(B3LYP/BS1) = -844.984721 au

E(B3LYP/BS2//B3LYP/BS1, solvent = dichloromethane) = -845.990648 au

E(M06/BS2//B3LYP/BS1, solvent = dichloromethane) = -845.296360 au

|   |             |             |             |
|---|-------------|-------------|-------------|
| C | -1.19064300 | -2.74164000 | -0.41336300 |
| C | 1.28236300  | -2.71047500 | -0.42393300 |
| C | 0.05246800  | -3.34191900 | -0.63223600 |
| H | 2.19178400  | -3.27654500 | -0.63788000 |
| H | 0.06374100  | -4.36641700 | -0.98394800 |
| H | -2.08714000 | -3.33130900 | -0.61766600 |
| C | -0.05072600 | 1.58717900  | -1.39382800 |
| H | 0.68484500  | 1.49698200  | -2.19937300 |
| H | -1.05562300 | 1.58571800  | -1.84360200 |
| N | 1.42198700  | -1.47051600 | 0.04151600  |
| N | -1.35867000 | -1.50435100 | 0.05137500  |
| C | -2.61592700 | -0.86850700 | 0.14002200  |
| C | -3.57223100 | -0.87439500 | -0.89059000 |
| C | -2.82962400 | -0.04808600 | 1.27151100  |
| C | -4.71928300 | -0.09304200 | -0.77429700 |
| H | -3.39889000 | -1.47177600 | -1.78074800 |
| C | -3.97895200 | 0.74890000  | 1.36747800  |
| H | -2.18531700 | -0.16499800 | 2.14946600  |
| C | -4.92176300 | 0.72943900  | 0.34217300  |
| H | -5.45809500 | -0.11170800 | -1.57013200 |
| H | -4.14553300 | 1.35114800  | 2.25564000  |
| H | -5.81616100 | 1.34005600  | 0.41231400  |
| C | 2.66260300  | -0.80125000 | 0.12109300  |
| C | 3.60515600  | -0.77139200 | -0.92175400 |
| C | 2.86916700  | 0.01291600  | 1.25824900  |
| C | 4.73282400  | 0.03868200  | -0.81195100 |

|   |             |             |             |
|---|-------------|-------------|-------------|
| H | 3.43579800  | -1.36445900 | -1.81556000 |
| C | 3.99848500  | 0.83818700  | 1.34825000  |
| H | 2.23669700  | -0.12718700 | 2.14114500  |
| C | 4.92823700  | 0.85415700  | 0.31081800  |
| H | 5.46137900  | 0.04777800  | -1.61733800 |
| H | 4.16067100  | 1.43562300  | 2.24048500  |
| H | 5.80730200  | 1.48717000  | 0.37635200  |
| C | 0.17343700  | 2.86061100  | -0.55660700 |
| C | -0.42644400 | 4.15521400  | -1.12821200 |
| H | -1.50726800 | 4.05032400  | -1.27121800 |
| H | -0.24665000 | 5.01125500  | -0.46825800 |
| H | 0.02235100  | 4.37225400  | -2.10258000 |
| H | 1.24909100  | 3.00851800  | -0.37954800 |
| H | -0.27378500 | 2.75561700  | 0.47493100  |
| Y | 0.01083800  | 0.24739900  | 0.44385500  |

### La\_1\_III

E(B3LYP/BS1) = -838.559557 au

H(B3LYP/BS1) = -838.202259 au

G(B3LYP/BS1) = -838.279290 au

E(B3LYP/BS2//B3LYP/BS1, solvent = dichloromethane) = -839.257787 au

E(M06/BS2//B3LYP/BS1, solvent = dichloromethane) = -838.565755 au

|   |             |             |             |
|---|-------------|-------------|-------------|
| C | 1.27188200  | -2.72035500 | 0.64686100  |
| C | -1.20842000 | -2.74020700 | 0.64333900  |
| C | 0.03613700  | -3.32201800 | 0.89995000  |
| H | -2.09828800 | -3.30783100 | 0.92649100  |
| H | 0.04334300  | -4.30976600 | 1.34516300  |
| H | 2.17003200  | -3.27365000 | 0.93222300  |
| C | 0.00410700  | 1.79477200  | 1.32383500  |
| H | -0.82756300 | 1.66337600  | 2.02954100  |
| H | 0.94096900  | 1.78884800  | 1.89969000  |
| N | -1.39732300 | -1.55528700 | 0.06567400  |
| N | 1.44273000  | -1.53238700 | 0.06987800  |
| C | 2.70832600  | -0.91143800 | -0.00937500 |
| C | 3.57856600  | -0.78801200 | 1.08952500  |
| C | 3.03367600  | -0.25357000 | -1.21702900 |
| C | 4.75057800  | -0.04533200 | 0.96849300  |
| H | 3.31852200  | -1.25935600 | 2.03282100  |
| C | 4.20797400  | 0.50440700  | -1.32166600 |
| H | 2.45167800  | -0.46814800 | -2.11775200 |
| C | 5.06448300  | 0.61258800  | -0.22793600 |
| H | 5.42059600  | 0.03429700  | 1.81957500  |
| H | 4.46149200  | 0.97783800  | -2.26571700 |
| H | 5.97707000  | 1.19488900  | -0.30529400 |
| C | -2.67352900 | -0.95608300 | -0.01646000 |
| C | -3.54644700 | -0.84507000 | 1.08171000  |
| C | -3.01019700 | -0.30804900 | -1.22626500 |
| C | -4.73180300 | -0.12417800 | 0.95782700  |
| H | -3.27864900 | -1.30918200 | 2.02643500  |
| C | -4.19775900 | 0.42820300  | -1.33373300 |
| H | -2.42253100 | -0.51303500 | -2.12538400 |
| C | -5.05691100 | 0.52400500  | -0.24082500 |
| H | -5.40367700 | -0.05416600 | 1.80829000  |
| H | -4.45903600 | 0.89446800  | -2.27923000 |
| H | -5.97991500 | 1.08933800  | -0.32053200 |

|    |             |            |             |
|----|-------------|------------|-------------|
| C  | -0.14486100 | 3.10288100 | 0.52729500  |
| C  | -0.13638000 | 4.38965600 | 1.37074300  |
| H  | 0.80159700  | 4.47174800 | 1.92981100  |
| H  | -0.24408900 | 5.28297700 | 0.74512800  |
| H  | -0.95877800 | 4.37437800 | 2.09350400  |
| H  | -1.08819000 | 3.09293700 | -0.05525600 |
| H  | 0.67231200  | 3.19684800 | -0.21974400 |
| La | 0.00857400  | 0.31567900 | -0.60256700 |

#### Al\_1\_IV

E(B3LYP/BS1) = -808.882895 au

H(B3LYP/BS1) = -808.536024 au

G(B3LYP/BS1) = -808.604462 au

E(B3LYP/BS2//B3LYP/BS1, solvent = dichloromethane) = -1049.601179 au

E(M06/BS2//B3LYP/BS1, solvent = dichloromethane) = -1048.934569 au

|    |             |             |             |
|----|-------------|-------------|-------------|
| C  | 1.18344600  | -2.15186100 | -0.53094600 |
| C  | -1.29719500 | -2.12402100 | -0.52887800 |
| C  | -0.06469800 | -2.76512100 | -0.66178500 |
| H  | -2.19131600 | -2.74256000 | -0.62790200 |
| H  | -0.07691900 | -3.82670800 | -0.87830200 |
| H  | 2.06266200  | -2.79068200 | -0.63447400 |
| N  | -1.49796100 | -0.82578200 | -0.30644200 |
| N  | 1.41355100  | -0.86049600 | -0.30509500 |
| C  | -2.84697100 | -0.40075000 | -0.09399200 |
| C  | -3.67964200 | -1.07157400 | 0.81474600  |
| C  | -3.34380600 | 0.71143400  | -0.78826200 |
| C  | -4.99384400 | -0.64632700 | 1.00901900  |
| H  | -3.28404000 | -1.90643900 | 1.38627300  |
| C  | -4.65677000 | 1.13466700  | -0.58317800 |
| H  | -2.70352100 | 1.22530000  | -1.49726100 |
| C  | -5.48813600 | 0.45753100  | 0.31170000  |
| H  | -5.62680300 | -1.17188400 | 1.71901700  |
| H  | -5.03178900 | 1.99391100  | -1.13242700 |
| H  | -6.50972500 | 0.79143000  | 0.46941200  |
| C  | 2.77170500  | -0.46384700 | -0.09800200 |
| C  | 3.27861200  | 0.65450200  | -0.77494900 |
| C  | 3.60315300  | -1.16691800 | 0.78717800  |
| C  | 4.60136300  | 1.05032700  | -0.57819700 |
| H  | 2.63706000  | 1.19455500  | -1.46328400 |
| C  | 4.92690300  | -0.76846600 | 0.97312700  |
| H  | 3.20028500  | -2.00543200 | 1.34814800  |
| C  | 5.43202200  | 0.34030200  | 0.29156800  |
| H  | 4.98431500  | 1.91446100  | -1.11412100 |
| H  | 5.55897200  | -1.31879000 | 1.66493500  |
| H  | 6.46126500  | 0.65300800  | 0.44281900  |
| C  | 0.04712200  | 1.74917600  | 1.48550600  |
| C  | 0.06323600  | 2.27214900  | -0.96752900 |
| C  | 0.49654400  | 2.82753600  | 0.43677200  |
| H  | -0.95072000 | 1.98787000  | 1.87991000  |
| H  | 0.71892700  | 1.66080800  | 2.34603600  |
| H  | -0.92728100 | 2.66479900  | -1.23710900 |
| H  | 0.73825700  | 2.55334900  | -1.78468400 |
| H  | 0.09488300  | 3.83038100  | 0.64471700  |
| H  | 1.59069800  | 2.91695900  | 0.46459400  |
| Al | -0.02712400 | 0.48824500  | -0.05684100 |

## CH4

E(B3LYP/BS1) = -40.517663 au

H(B3LYP/BS1) = -40.468641 au

G(B3LYP/BS1) = -40.489773 au

E(B3LYP/BS2//B3LYP/BS1, solvent = dichloromethane) = -40.535043 au

E(M06/BS2//B3LYP/BS1, solvent = dichloromethane) = -40.489214 au

|   |             |             |             |
|---|-------------|-------------|-------------|
| C | 0.00000000  | 0.00000000  | 0.00000000  |
| H | 0.63139700  | 0.63139700  | 0.63139700  |
| H | -0.63139700 | -0.63139700 | 0.63139700  |
| H | -0.63139700 | 0.63139700  | -0.63139700 |
| H | 0.63139700  | -0.63139700 | -0.63139700 |

## Al\_1\_V

E(B3LYP/BS1) = -849.429470 au

H(B3LYP/BS1) = -849.030292 au

G(B3LYP/BS1) = -849.107931 au

E(B3LYP/BS2//B3LYP/BS1, solvent = dichloromethane) = -1090.160262 au

E(M06/BS2//B3LYP/BS1, solvent = dichloromethane) = -1089.453306 au

|    |             |             |             |
|----|-------------|-------------|-------------|
| C  | 1.13681200  | -2.16816800 | -0.87789500 |
| C  | -1.34732600 | -2.11110700 | -0.86657500 |
| C  | -0.12013500 | -2.72001300 | -1.14072400 |
| H  | -2.24306600 | -2.71543600 | -1.02407400 |
| H  | -0.14525500 | -3.72941600 | -1.53434200 |
| H  | 2.00293300  | -2.81283100 | -1.04176600 |
| N  | -1.53763600 | -0.86810300 | -0.42900500 |
| N  | 1.38598700  | -0.93469900 | -0.44588900 |
| C  | -2.85574000 | -0.50051400 | -0.03145500 |
| C  | -3.66282800 | -1.37106300 | 0.71955200  |
| C  | -3.35506100 | 0.76810800  | -0.36637900 |
| C  | -4.94961600 | -0.98990800 | 1.09922600  |
| H  | -3.26649200 | -2.33253900 | 1.03293300  |
| C  | -4.63907000 | 1.14518100  | 0.02400500  |
| H  | -2.74505100 | 1.44596100  | -0.95499000 |
| C  | -5.44528600 | 0.26829600  | 0.75329400  |
| H  | -5.55865100 | -1.67486800 | 1.68322400  |
| H  | -5.01218600 | 2.12800700  | -0.25095100 |
| H  | -6.44489300 | 0.56618400  | 1.05646800  |
| C  | 2.72394200  | -0.61972500 | -0.07136500 |
| C  | 3.27245700  | 0.62059000  | -0.43432500 |
| C  | 3.50323300  | -1.51381600 | 0.68090700  |
| C  | 4.57751600  | 0.94735700  | -0.06790800 |
| H  | 2.68414900  | 1.31435400  | -1.02686700 |
| C  | 4.81056300  | -1.18297800 | 1.03679700  |
| H  | 3.07026200  | -2.45299400 | 1.01294200  |
| C  | 5.35499400  | 0.04728200  | 0.66431300  |
| H  | 4.98907000  | 1.90839700  | -0.36402600 |
| H  | 5.39815100  | -1.88475800 | 1.62277500  |
| H  | 6.37080700  | 0.30589900  | 0.94906600  |
| Al | -0.04413300 | 0.45686300  | -0.24994500 |
| C  | -0.07486700 | 1.14225800  | 1.62804500  |
| H  | -1.11646800 | 1.40641700  | 1.87022300  |
| H  | 0.15452300  | 0.29399200  | 2.29270900  |
| C  | -0.01336300 | 1.65426000  | -1.86894600 |



|   |             |            |             |
|---|-------------|------------|-------------|
| H | 0.76284700  | 1.28322900 | -2.55754700 |
| H | -0.95098700 | 1.50992000 | -2.42939700 |
| C | 0.83291200  | 2.33118500 | 2.00524700  |
| H | 1.89247300  | 2.10706400 | 1.83028600  |
| H | 0.59489400  | 3.22537900 | 1.41599800  |
| H | 0.73519300  | 2.61034100 | 3.06435900  |
| C | 0.19958300  | 3.16507400 | -1.64321600 |
| H | 1.15522600  | 3.37218800 | -1.14415800 |
| H | 0.19736500  | 3.73739100 | -2.58194300 |
| H | -0.58189100 | 3.59471700 | -1.00297000 |

### Ga\_1\_IV

E(B3LYP/BS1) = -808.921188 au

H(B3LYP/BS1) = -808.574563 au

G(B3LYP/BS1) = -808.644000 au

E(B3LYP/BS2//B3LYP/BS1, solvent = dichloromethane) = -2732.007921 au

E(M06/BS2//B3LYP/BS1, solvent = dichloromethane) = -2731.284251 au

|   |             |             |             |
|---|-------------|-------------|-------------|
| C | -1.19359600 | 2.20588000  | -0.52761000 |
| C | 1.29527700  | 2.17837900  | -0.52428900 |
| C | 0.05831700  | 2.81274100  | -0.65852200 |
| H | 2.18337500  | 2.80610200  | -0.62290400 |
| H | 0.07050700  | 3.87414400  | -0.87657700 |
| H | -2.06705100 | 2.85269400  | -0.63280200 |
| N | 1.51161100  | 0.88439500  | -0.30372200 |
| N | -1.43803200 | 0.91885100  | -0.30196300 |
| C | 2.85932700  | 0.46691900  | -0.08709300 |
| C | 3.69402300  | 1.15307100  | 0.80880000  |
| C | 3.35692700  | -0.65616200 | -0.76383900 |
| C | 5.00936500  | 0.73272400  | 1.00642400  |
| H | 3.29899800  | 1.99604400  | 1.36865000  |
| C | 4.67071700  | -1.07434900 | -0.55537800 |
| H | 2.71621300  | -1.18198000 | -1.46377900 |
| C | 5.50373300  | -0.38161400 | 0.32618500  |
| H | 5.64318600  | 1.27052300  | 1.70647700  |
| H | 5.04549600  | -1.94196800 | -1.09154800 |
| H | 6.52610700  | -0.71164900 | 0.48689800  |
| C | -2.79377200 | 0.52707200  | -0.09064800 |
| C | -3.29546500 | -0.61087700 | -0.73922800 |
| C | -3.63254100 | 1.25045100  | 0.77164400  |
| C | -4.61802600 | -1.00481000 | -0.53937900 |
| H | -2.64974500 | -1.16756700 | -1.41030500 |
| C | -4.95638600 | 0.85363700  | 0.96069400  |
| H | -3.23537900 | 2.10376800  | 1.31397000  |
| C | -5.45562800 | -0.27393600 | 0.30636000  |
| H | -4.99575900 | -1.88403800 | -1.05413000 |
| H | -5.59320600 | 1.42040000  | 1.63471200  |
| H | -6.48489800 | -0.58514900 | 0.46042800  |
| C | -0.04443500 | -1.74644400 | 1.48109300  |
| C | -0.06065600 | -2.25906200 | -0.96346500 |
| C | -0.47302600 | -2.82996400 | 0.43565400  |
| H | 0.95803100  | -1.95264700 | 1.87896800  |
| H | -0.72223600 | -1.64903900 | 2.33534000  |
| H | 0.93465200  | -2.62167600 | -1.25255700 |
| H | -0.74183000 | -2.52378300 | -1.78041100 |
| H | -0.04551500 | -3.82294500 | 0.63835100  |

|    |             |             |             |
|----|-------------|-------------|-------------|
| H  | -1.56430200 | -2.94575200 | 0.46877300  |
| Ga | 0.02139900  | -0.45226300 | -0.05652200 |

### Ga\_1\_V

E(B3LYP/BS1) = -849.471044 au

H(B3LYP/BS1) = -849.071840 au

G(B3LYP/BS1) = -849.149065 au

E(B3LYP/BS2//B3LYP/BS1, solvent = dichloromethane) = -2772.572961 au

E(M06/BS2//B3LYP/BS1, solvent = dichloromethane) = -2771.808790 au

|    |             |             |             |
|----|-------------|-------------|-------------|
| C  | 1.19883100  | -2.18112000 | -0.88745500 |
| C  | -1.29341400 | -2.16854500 | -0.84383600 |
| C  | -0.05465700 | -2.74651100 | -1.13869700 |
| H  | -2.17433400 | -2.79595300 | -0.99773700 |
| H  | -0.06675100 | -3.75288100 | -1.54104200 |
| H  | 2.06733700  | -2.81888400 | -1.06717800 |
| N  | -1.51378400 | -0.93704000 | -0.39588500 |
| N  | 1.44827800  | -0.95029100 | -0.45098700 |
| C  | -2.83432300 | -0.59779500 | 0.00858200  |
| C  | -3.62737800 | -1.48912800 | 0.75071500  |
| C  | -3.35544000 | 0.66608800  | -0.31255300 |
| C  | -4.91964100 | -1.13235400 | 1.13562500  |
| H  | -3.21563700 | -2.44760900 | 1.05315300  |
| C  | -4.64477000 | 1.01860000  | 0.08281000  |
| H  | -2.75751400 | 1.35952900  | -0.89578800 |
| C  | -5.43607900 | 0.12131800  | 0.80383100  |
| H  | -5.51709000 | -1.83319100 | 1.71280700  |
| H  | -5.03395000 | 1.99811100  | -0.18170100 |
| H  | -6.43985800 | 0.39995800  | 1.11151900  |
| C  | 2.78231400  | -0.63234000 | -0.07475700 |
| C  | 3.31688900  | 0.62468900  | -0.40117400 |
| C  | 3.57759700  | -1.53952700 | 0.64578600  |
| C  | 4.62050600  | 0.95456400  | -0.03321500 |
| H  | 2.71688000  | 1.33085900  | -0.96651800 |
| C  | 4.88383300  | -1.20570300 | 1.00294000  |
| H  | 3.15753000  | -2.49268500 | 0.95341700  |
| C  | 5.41323300  | 0.04094600  | 0.66535700  |
| H  | 5.01950700  | 1.92888200  | -0.30213700 |
| H  | 5.48232300  | -1.91886500 | 1.56370500  |
| H  | 6.42814900  | 0.30164600  | 0.95140600  |
| C  | -0.02806200 | 1.07764100  | 1.68539900  |
| H  | -1.07461500 | 1.26707500  | 1.96485300  |
| H  | 0.28873800  | 0.23380500  | 2.31532200  |
| C  | -0.06745200 | 1.63290600  | -1.84241800 |
| H  | 0.86991700  | 1.50427800  | -2.40300200 |
| H  | -0.84501500 | 1.23968000  | -2.51407200 |
| C  | 0.81811300  | 2.31790100  | 2.02935000  |
| H  | 1.88007500  | 2.16191300  | 1.80376200  |
| H  | 0.49444700  | 3.19885200  | 1.46161600  |
| H  | 0.75067600  | 2.57993700  | 3.09485200  |
| C  | -0.31129900 | 3.13453600  | -1.60136200 |
| H  | 0.49599400  | 3.58692800  | -1.01238200 |
| H  | -0.38298200 | 3.70207900  | -2.53995000 |
| H  | -1.24095000 | 3.31623700  | -1.04565600 |
| Ga | -0.02184300 | 0.44466500  | -0.21421600 |

### In\_1\_IV

E(B3LYP/BS1) = -808.717586 au

H(B3LYP/BS1) = -808.371783 au

G(B3LYP/BS1) = -808.443318 au

E(B3LYP/BS2//B3LYP/BS1, solvent = dichloromethane) = -997.276745 au

E(M06/BS2//B3LYP/BS1, solvent = dichloromethane) = -996.639752 au

|    |             |             |             |
|----|-------------|-------------|-------------|
| C  | 1.20183800  | -2.32003400 | -0.46205200 |
| C  | -1.31638200 | -2.28630300 | -0.45841000 |
| C  | -0.06587900 | -2.90343500 | -0.56994500 |
| H  | -2.18237000 | -2.94571000 | -0.55788300 |
| H  | -0.08069100 | -3.96991000 | -0.76529500 |
| H  | 2.04958000  | -3.00202300 | -0.56611000 |
| N  | -1.58146000 | -0.99759000 | -0.26831900 |
| N  | 1.49979600  | -1.03990600 | -0.26949300 |
| C  | -2.94045400 | -0.61281900 | -0.08932700 |
| C  | -3.80828200 | -1.33971000 | 0.74246000  |
| C  | -3.42066300 | 0.53806200  | -0.73414300 |
| C  | -5.13314000 | -0.93426100 | 0.90332500  |
| H  | -3.43277900 | -2.20260000 | 1.28497800  |
| C  | -4.74430500 | 0.94084400  | -0.56245100 |
| H  | -2.75795100 | 1.10001400  | -1.38619200 |
| C  | -5.60840400 | 0.20568900  | 0.25237200  |
| H  | -5.79054500 | -1.50449100 | 1.55434600  |
| H  | -5.10177900 | 1.82996400  | -1.07467000 |
| H  | -6.63856300 | 0.52319700  | 0.38576600  |
| C  | 2.86786100  | -0.68678100 | -0.09514100 |
| C  | 3.36501700  | 0.46637300  | -0.72307300 |
| C  | 3.72836800  | -1.44588500 | 0.71518100  |
| C  | 4.69839700  | 0.83843100  | -0.55776600 |
| H  | 2.70701000  | 1.05472900  | -1.35654900 |
| C  | 5.06283400  | -1.07067000 | 0.86971500  |
| H  | 3.34086100  | -2.30993300 | 1.24727000  |
| C  | 5.55533700  | 0.07068500  | 0.23426600  |
| H  | 5.06886100  | 1.72962300  | -1.05698900 |
| H  | 5.71443900  | -1.66574800 | 1.50413300  |
| H  | 6.59315200  | 0.36442700  | 0.36273000  |
| C  | 0.07157200  | 2.06487500  | 1.53311100  |
| C  | 0.07532800  | 2.49843100  | -0.97126500 |
| C  | 0.51753300  | 3.05793800  | 0.41639100  |
| H  | -0.93380600 | 2.29979500  | 1.90545500  |
| H  | 0.74461000  | 2.02879700  | 2.39515600  |
| H  | -0.92916300 | 2.85174400  | -1.23995800 |
| H  | 0.74373700  | 2.76855200  | -1.79601500 |
| H  | 0.14003200  | 4.07749800  | 0.59187300  |
| H  | 1.61377100  | 3.12610700  | 0.43141900  |
| In | -0.01910700 | 0.52285500  | -0.01547500 |

### In\_1\_V

E(B3LYP/BS1) = -849.268267 au

H(B3LYP/BS1) = -848.869950 au

G(B3LYP/BS1) = -848.951144 au

E(B3LYP/BS2//B3LYP/BS1, solvent = dichloromethane) = -1037.842900 au

E(M06/BS2//B3LYP/BS1, solvent = dichloromethane) = -1037.164086 au

|   |            |             |             |
|---|------------|-------------|-------------|
| C | 1.14228000 | -2.30664300 | -0.82108300 |
|---|------------|-------------|-------------|

|    |             |             |             |
|----|-------------|-------------|-------------|
| C  | -1.37865000 | -2.23843900 | -0.80158700 |
| C  | -0.13547000 | -2.83467600 | -1.04442000 |
| H  | -2.24927500 | -2.87942400 | -0.96594700 |
| H  | -0.16612300 | -3.85479000 | -1.41139500 |
| H  | 1.97478100  | -2.99261500 | -1.00105300 |
| N  | -1.63134000 | -0.99524500 | -0.40655200 |
| N  | 1.46404300  | -1.08000700 | -0.42802100 |
| C  | -2.96853800 | -0.66108600 | -0.06495400 |
| C  | -3.78692500 | -1.53592300 | 0.67110300  |
| C  | -3.48472500 | 0.59182800  | -0.43691600 |
| C  | -5.09275600 | -1.17378300 | 1.00084700  |
| H  | -3.38417700 | -2.48521600 | 1.01210500  |
| C  | -4.78813200 | 0.95032100  | -0.09666600 |
| H  | -2.86996000 | 1.27051900  | -1.02165800 |
| C  | -5.60148900 | 0.06912800  | 0.61956700  |
| H  | -5.70820100 | -1.86194700 | 1.57446600  |
| H  | -5.17107100 | 1.92067200  | -0.40125000 |
| H  | -6.61621700 | 0.35160200  | 0.88483700  |
| C  | 2.82065700  | -0.80846200 | -0.11193000 |
| C  | 3.38017500  | 0.42696600  | -0.48087100 |
| C  | 3.61773400  | -1.72531500 | 0.59563300  |
| C  | 4.70439100  | 0.72749100  | -0.16525600 |
| H  | 2.78217500  | 1.13707900  | -1.04590500 |
| C  | 4.94416000  | -1.42101000 | 0.90058700  |
| H  | 3.18365700  | -2.66120100 | 0.93515800  |
| C  | 5.49569600  | -0.19543600 | 0.52264900  |
| H  | 5.12047800  | 1.68491200  | -0.46712800 |
| H  | 5.54282600  | -2.14076800 | 1.45280900  |
| H  | 6.52664500  | 0.04166900  | 0.76907200  |
| C  | -0.03152300 | 1.05482100  | 1.99858200  |
| H  | -1.07048400 | 1.25189200  | 2.29599000  |
| H  | 0.27002200  | 0.15832700  | 2.55722000  |
| C  | 0.01311400  | 1.84757700  | -1.83737300 |
| H  | 0.72203800  | 1.41472000  | -2.55714800 |
| H  | -0.96421200 | 1.79706400  | -2.33745300 |
| C  | 0.85915500  | 2.24380300  | 2.40083400  |
| H  | 1.91358000  | 2.06383500  | 2.15658300  |
| H  | 0.56422600  | 3.16668800  | 1.88580200  |
| H  | 0.81079400  | 2.44902700  | 3.48025800  |
| C  | 0.37660600  | 3.31834200  | -1.56601900 |
| H  | 1.36712500  | 3.41869300  | -1.10302900 |
| H  | 0.39248600  | 3.92040800  | -2.48617900 |
| H  | -0.33776700 | 3.79547600  | -0.88310900 |
| In | -0.04034300 | 0.52210400  | -0.10566100 |

### Sc\_1\_IV

E(B3LYP/BS1) = -853.345650 au

H(B3LYP/BS1) = -853.001715 au

G(B3LYP/BS1) = -853.073966 au

E(B3LYP/BS2//B3LYP/BS1, solvent = dichloromethane) = -1567.865416 au

E(M06/BS2//B3LYP/BS1, solvent = dichloromethane) = -1567.182721 au

|   |             |             |             |
|---|-------------|-------------|-------------|
| C | 1.21279400  | -2.24171200 | -0.53945100 |
| C | -1.30543400 | -2.21204700 | -0.53760200 |
| C | -0.05303500 | -2.82612400 | -0.66811800 |
| H | -2.17148600 | -2.87309800 | -0.63656300 |

|    |             |             |             |
|----|-------------|-------------|-------------|
| H  | -0.06588500 | -3.88886500 | -0.88449400 |
| H  | 2.06414900  | -2.92097700 | -0.64184300 |
| N  | -1.56172600 | -0.92405500 | -0.32227300 |
| N  | 1.49662300  | -0.95958400 | -0.32213600 |
| C  | -2.90759000 | -0.53262900 | -0.09139700 |
| C  | -3.75559000 | -1.24792500 | 0.77219000  |
| C  | -3.39227800 | 0.63442800  | -0.70675900 |
| C  | -5.06133600 | -0.81323200 | 0.99514700  |
| H  | -3.37579800 | -2.12505600 | 1.28836800  |
| C  | -4.69636900 | 1.06882700  | -0.46907800 |
| H  | -2.75150400 | 1.17996100  | -1.39559300 |
| C  | -5.53842500 | 0.34587200  | 0.37816500  |
| H  | -5.70376200 | -1.37569300 | 1.66761500  |
| H  | -5.05630600 | 1.97008700  | -0.95789800 |
| H  | -6.55391700 | 0.68500700  | 0.56129700  |
| C  | 2.84860000  | -0.59067600 | -0.09406500 |
| C  | 3.34264000  | 0.57973000  | -0.69595800 |
| C  | 3.69377900  | -1.32847900 | 0.75331500  |
| C  | 4.65351600  | 0.99504700  | -0.46131300 |
| H  | 2.70326400  | 1.14255200  | -1.37253900 |
| C  | 5.00635200  | -0.91296700 | 0.97215900  |
| H  | 3.30735100  | -2.20811000 | 1.26021900  |
| C  | 5.49302200  | 0.24923800  | 0.36842000  |
| H  | 5.02088300  | 1.89898600  | -0.93954600 |
| H  | 5.64694000  | -1.49296200 | 1.63136900  |
| H  | 6.51409000  | 0.57296300  | 0.54837900  |
| C  | 0.02773700  | 2.02754000  | 1.50521900  |
| C  | 0.05778900  | 2.50787700  | -1.09834000 |
| C  | 0.38584600  | 3.04651900  | 0.35281400  |
| H  | -0.96492600 | 2.24167800  | 1.92740400  |
| H  | 0.76125900  | 2.05161400  | 2.31654200  |
| H  | -0.91514300 | 2.88726900  | -1.44209300 |
| H  | 0.81177100  | 2.82126200  | -1.82756200 |
| H  | -0.13900500 | 3.99541600  | 0.52051200  |
| H  | 1.46056400  | 3.25756600  | 0.40589900  |
| Sc | -0.00994800 | 0.61286500  | -0.09193800 |

### Sc\_1\_V

E(B3LYP/BS1) = -893.874594 au

H(B3LYP/BS1) = -893.479141 au

G(B3LYP/BS1) = -893.560944 au

E(B3LYP/BS2//B3LYP/BS1, solvent = dichloromethane) = -1608.408907 au

E(M06/BS2//B3LYP/BS1, solvent = dichloromethane) = -1607.684971 au

|   |             |             |             |
|---|-------------|-------------|-------------|
| C | 1.10297400  | -2.30109400 | -0.84757100 |
| C | -1.40917900 | -2.21820300 | -0.83223500 |
| C | -0.17335800 | -2.82902000 | -1.07743800 |
| H | -2.29251400 | -2.84351500 | -0.99082800 |
| H | -0.20913800 | -3.84775500 | -1.44780000 |
| H | 1.94151500  | -2.98150400 | -1.02165000 |
| N | -1.62815800 | -0.96823600 | -0.42939400 |
| N | 1.40789500  | -1.06970300 | -0.44410900 |
| C | -2.94690800 | -0.60031000 | -0.05215600 |
| C | -3.75526100 | -1.43450500 | 0.74001000  |
| C | -3.44308200 | 0.65650100  | -0.43946200 |
| C | -5.03454500 | -1.02604900 | 1.11416500  |

|    |             |             |             |
|----|-------------|-------------|-------------|
| H  | -3.36347000 | -2.38724000 | 1.08460600  |
| C  | -4.71921300 | 1.06283200  | -0.05018800 |
| H  | -2.83948000 | 1.29874900  | -1.07672900 |
| C  | -5.52293500 | 0.22298200  | 0.72319700  |
| H  | -5.64608500 | -1.68196100 | 1.72817200  |
| H  | -5.08839700 | 2.03558500  | -0.36345800 |
| H  | -6.51707600 | 0.54072200  | 1.02390300  |
| C  | 2.75471700  | -0.78271500 | -0.09937000 |
| C  | 3.31509300  | 0.44158700  | -0.50329200 |
| C  | 3.53085200  | -1.66298800 | 0.67483500  |
| C  | 4.62295900  | 0.77118700  | -0.14724300 |
| H  | 2.73564400  | 1.11720100  | -1.12903800 |
| C  | 4.84128800  | -1.33139700 | 1.01534800  |
| H  | 3.09141500  | -2.59037500 | 1.03096700  |
| C  | 5.39376200  | -0.11439500 | 0.60832800  |
| H  | 5.04178600  | 1.71958200  | -0.47232000 |
| H  | 5.42789600  | -2.02186900 | 1.61563500  |
| H  | 6.41246600  | 0.14331300  | 0.88311200  |
| C  | -0.09423800 | 1.48839600  | 1.76359300  |
| H  | -1.03103000 | 2.07625400  | 1.80699800  |
| H  | -0.22437600 | 0.68740900  | 2.51461800  |
| C  | 0.01155800  | 1.97768200  | -1.87830700 |
| H  | 0.70036300  | 1.56944900  | -2.64193300 |
| H  | -0.97506500 | 1.97131400  | -2.37892600 |
| C  | 1.08855500  | 2.38645500  | 2.16871200  |
| H  | 2.03863000  | 1.83464500  | 2.16295100  |
| H  | 1.20699800  | 3.23202300  | 1.47770700  |
| H  | 0.98025000  | 2.81654300  | 3.17659000  |
| C  | 0.40445400  | 3.43349500  | -1.56143700 |
| H  | 1.40915000  | 3.49795600  | -1.11967200 |
| H  | 0.41019700  | 4.08629700  | -2.44818400 |
| H  | -0.28187500 | 3.89041200  | -0.83574100 |
| Sc | -0.05671100 | 0.53617600  | -0.20863700 |

#### Y\_1\_IV

E(B3LYP/BS1) = -844.823339 au

H(B3LYP/BS1) = -844.480257 au

G(B3LYP/BS1) = -844.554416 au

E(B3LYP/BS2//B3LYP/BS1, solvent = dichloromethane) = -845.485556 au

E(M06/BS2//B3LYP/BS1, solvent = dichloromethane) = -844.793641 au

|   |             |             |             |
|---|-------------|-------------|-------------|
| C | 1.20927100  | -2.42529000 | -0.47218100 |
| C | -1.32365700 | -2.38830500 | -0.47029400 |
| C | -0.06545100 | -3.00024700 | -0.57147600 |
| H | -2.18044300 | -3.06556300 | -0.54663600 |
| H | -0.08135800 | -4.07185500 | -0.74022400 |
| H | 2.04716200  | -3.12541900 | -0.55088500 |
| N | -1.59705800 | -1.09703300 | -0.31272400 |
| N | 1.51766300  | -1.14163000 | -0.31417100 |
| C | -2.93992700 | -0.69873600 | -0.10306300 |
| C | -3.81250400 | -1.39000700 | 0.75748400  |
| C | -3.39636700 | 0.47814200  | -0.72591200 |
| C | -5.10883400 | -0.92333400 | 0.96839700  |
| H | -3.45804700 | -2.27348300 | 1.28066400  |
| C | -4.69137800 | 0.94554700  | -0.49857300 |
| H | -2.74718700 | 1.00326500  | -1.42562400 |

|   |             |             |             |
|---|-------------|-------------|-------------|
| C | -5.55504900 | 0.24547500  | 0.34555300  |
| H | -5.76917900 | -1.46786100 | 1.63827800  |
| H | -5.02651200 | 1.85250100  | -0.99413800 |
| H | -6.56323600 | 0.60887100  | 0.52164700  |
| C | 2.86923600  | -0.77391500 | -0.10742000 |
| C | 3.34579500  | 0.39848900  | -0.72411100 |
| C | 3.73148900  | -1.48857700 | 0.74447700  |
| C | 4.65076600  | 0.83869000  | -0.49877700 |
| H | 2.70403700  | 0.94174300  | -1.41728700 |
| C | 5.03778400  | -1.04936700 | 0.95211900  |
| H | 3.36196400  | -2.36843600 | 1.26330700  |
| C | 5.50421300  | 0.11512200  | 0.33572600  |
| H | 5.00157600  | 1.74250400  | -0.98918200 |
| H | 5.69045700  | -1.61183800 | 1.61465900  |
| H | 6.52040600  | 0.45677700  | 0.50930600  |
| C | 0.03647300  | 2.30067400  | 1.55219700  |
| C | 0.06736600  | 2.72305500  | -1.08745600 |
| C | 0.46441500  | 3.23979100  | 0.35480400  |
| H | -0.97289200 | 2.57020500  | 1.90296400  |
| H | 0.72006400  | 2.40911300  | 2.40005500  |
| H | -0.92814200 | 3.10703300  | -1.36212200 |
| H | 0.77210700  | 3.08830700  | -1.84189800 |
| H | 0.05091100  | 4.24663600  | 0.50924300  |
| H | 1.55812600  | 3.34410100  | 0.38544100  |
| Y | -0.00733100 | 0.65130200  | -0.05841700 |

### Y\_1\_V

E(B3LYP/BS1) = -885.357006 au

H(B3LYP/BS1) = -884.963340 au

G(B3LYP/BS1) = -885.045068 au

E(B3LYP/BS2//B3LYP/BS1, solvent = dichloromethane) = -886.030760 au

E(M06/BS2//B3LYP/BS1, solvent = dichloromethane) = -885.296646 au

|   |             |             |             |
|---|-------------|-------------|-------------|
| C | 1.23170000  | -2.51711100 | -0.67786800 |
| C | -1.28728300 | -2.51942200 | -0.61947300 |
| C | -0.03062200 | -3.11334100 | -0.79611100 |
| H | -2.14750700 | -3.19108300 | -0.70316400 |
| H | -0.03499500 | -4.17286000 | -1.02847900 |
| H | 2.08787700  | -3.18870000 | -0.79655300 |
| N | -1.54920800 | -1.23952900 | -0.37545100 |
| N | 1.50424600  | -1.23571000 | -0.45167200 |
| C | -2.87667500 | -0.84841700 | -0.07410900 |
| C | -3.70309000 | -1.57927000 | 0.79925400  |
| C | -3.35761100 | 0.36198800  | -0.60864600 |
| C | -4.98005100 | -1.11617400 | 1.11034900  |
| H | -3.32598400 | -2.49071400 | 1.25417600  |
| C | -4.63241500 | 0.82543500  | -0.27894000 |
| H | -2.74986200 | 0.91367800  | -1.32471900 |
| C | -5.45046000 | 0.08771400  | 0.57787400  |
| H | -5.60545400 | -1.69118100 | 1.78819400  |
| H | -4.98822300 | 1.75859200  | -0.70675500 |
| H | -6.44283000 | 0.44785400  | 0.83276500  |
| C | 2.84369900  | -0.84864500 | -0.20329300 |
| C | 3.30968000  | 0.35796100  | -0.75884300 |
| C | 3.70099300  | -1.58158500 | 0.63838600  |
| C | 4.59930600  | 0.81531900  | -0.48222400 |

|   |             |             |             |
|---|-------------|-------------|-------------|
| H | 2.67700300  | 0.91222800  | -1.45078700 |
| C | 4.99172600  | -1.12469000 | 0.89700000  |
| H | 3.33760000  | -2.48988200 | 1.11038300  |
| C | 5.44723000  | 0.07511200  | 0.34274200  |
| H | 4.94259300  | 1.74551300  | -0.92641300 |
| H | 5.64050800  | -1.70142000 | 1.55099100  |
| H | 6.45092100  | 0.43039900  | 0.55676500  |
| C | 0.04882200  | 1.41621900  | 2.09516700  |
| H | -0.95749800 | 1.77315700  | 2.38391600  |
| H | 0.27852900  | 0.61338200  | 2.81903900  |
| C | -0.13572600 | 2.19922600  | -1.81677700 |
| H | 0.86362100  | 2.36465100  | -2.26210100 |
| H | -0.73595500 | 1.80439800  | -2.65872000 |
| C | 1.05964900  | 2.56741100  | 2.28287600  |
| H | 2.08807600  | 2.24860000  | 2.05522800  |
| H | 0.83930600  | 3.41649200  | 1.61913300  |
| H | 1.08253600  | 2.97422200  | 3.30655200  |
| C | -0.71195700 | 3.56587000  | -1.38939600 |
| H | -0.10543400 | 4.03359800  | -0.60123800 |
| H | -0.77523300 | 4.29728500  | -2.21080000 |
| H | -1.72917000 | 3.47160900  | -0.97986500 |
| Y | -0.01992700 | 0.53603200  | -0.10424300 |

#### La\_1\_IV

E(B3LYP/BS1) = -838.094412 au

H(B3LYP/BS1) = -837.752221 au

G(B3LYP/BS1) = -837.827880 au

E(B3LYP/BS2//B3LYP/BS1, solvent = dichloromethane) = -838.705372 au

E(M06/BS2//B3LYP/BS1, solvent = dichloromethane) = -838.024763 au

|   |             |             |             |
|---|-------------|-------------|-------------|
| C | 1.17158700  | -2.63844900 | -0.38764000 |
| C | -1.36757600 | -2.59145500 | -0.38636800 |
| C | -0.10845800 | -3.21016900 | -0.44332400 |
| H | -2.22322000 | -3.27576700 | -0.41827900 |
| H | -0.12798100 | -4.29103800 | -0.53875500 |
| H | 2.00035900  | -3.35434100 | -0.42641200 |
| N | -1.63744100 | -1.29485100 | -0.32259500 |
| N | 1.49593800  | -1.35298500 | -0.31675300 |
| C | -2.96359400 | -0.86082300 | -0.13108400 |
| C | -3.85660000 | -1.47557100 | 0.76898600  |
| C | -3.38713500 | 0.30377000  | -0.80511500 |
| C | -5.13143200 | -0.94919400 | 0.96831400  |
| H | -3.53178900 | -2.34786300 | 1.32896800  |
| C | -4.66112000 | 0.83166600  | -0.58889800 |
| H | -2.73778800 | 0.75733700  | -1.55506500 |
| C | -5.54061500 | 0.20668400  | 0.29667600  |
| H | -5.80555600 | -1.43688300 | 1.66778100  |
| H | -4.96820700 | 1.72438600  | -1.12682900 |
| H | -6.53213300 | 0.61628800  | 0.46525000  |
| C | 2.84390400  | -0.98184000 | -0.13326900 |
| C | 3.32105500  | 0.15812300  | -0.81255900 |
| C | 3.70997800  | -1.64027900 | 0.76189700  |
| C | 4.62156200  | 0.62064700  | -0.60519900 |
| H | 2.68902800  | 0.64744800  | -1.55450100 |
| C | 5.01158000  | -1.17987500 | 0.95159200  |
| H | 3.34446400  | -2.49373800 | 1.32578300  |



|    |             |             |             |
|----|-------------|-------------|-------------|
| C  | 5.47436100  | -0.04750200 | 0.27489500  |
| H  | 4.96964500  | 1.49643500  | -1.14594400 |
| H  | 5.66463600  | -1.70023500 | 1.64748400  |
| H  | 6.48678800  | 0.31103700  | 0.43554000  |
| C  | 0.11932600  | 2.56125900  | 1.58340400  |
| C  | 0.15221300  | 2.94730700  | -1.03976200 |
| C  | 0.72250500  | 3.35272100  | 0.36815700  |
| H  | -0.88479500 | 2.95167600  | 1.82306200  |
| H  | 0.74421700  | 2.67418000  | 2.47563800  |
| H  | -0.84435200 | 3.39938400  | -1.18156200 |
| H  | 0.79783700  | 3.31147200  | -1.84623600 |
| H  | 0.60063000  | 4.43642100  | 0.52444100  |
| H  | 1.81347800  | 3.18279400  | 0.35766900  |
| La | -0.02200000 | 0.69269700  | -0.02854000 |

### La\_1\_V

E(B3LYP/BS1) = -878.632929 au

H(B3LYP/BS1) = -878.239363 au

G(B3LYP/BS1) = -878.326147 au

E(B3LYP/BS2//B3LYP/BS1, solvent = dichloromethane) = -879.251248 au

E(M06/BS2//B3LYP/BS1, solvent = dichloromethane) = -878.532436 au

|   |             |             |             |
|---|-------------|-------------|-------------|
| C | -1.05136943 | 2.61482575  | -0.48501096 |
| C | 1.46692957  | 2.53587675  | -0.47971696 |
| C | 0.22942057  | 3.18787675  | -0.52798396 |
| H | 2.34665857  | 3.18547975  | -0.54459596 |
| H | 0.26381157  | 4.26640375  | -0.64018296 |
| H | -1.88767543 | 3.31840875  | -0.56707396 |
| N | 1.64663621  | 1.18341306  | -0.38614137 |
| N | -1.35311378 | 1.32987090  | -0.39073779 |
| C | 2.96772621  | 0.70955206  | -0.23908437 |
| C | 3.90898921  | 1.30807706  | 0.62204863  |
| C | 3.33241121  | -0.47122194 | -0.91747137 |
| C | 5.17528021  | 0.74966706  | 0.77958063  |
| H | 3.62826921  | 2.19309706  | 1.18587963  |
| C | 4.59883821  | -1.03271594 | -0.73955637 |
| H | 2.64065021  | -0.91669594 | -1.63198137 |
| C | 5.52710421  | -0.42428594 | 0.10575163  |
| H | 5.88794121  | 1.22528706  | 1.44851963  |
| H | 4.86100921  | -1.93908894 | -1.27859337 |
| H | 6.51287821  | -0.85927694 | 0.24191563  |
| C | -2.70480178 | 0.94008790  | -0.28730179 |
| C | -3.13379278 | -0.18825010 | -1.01532179 |
| C | -3.62182878 | 1.57177890  | 0.57539721  |
| C | -4.43906778 | -0.66678110 | -0.88465179 |
| H | -2.45688778 | -0.64918010 | -1.73410879 |
| C | -4.92611078 | 1.09430690  | 0.69011121  |
| H | -3.29406178 | 2.41881390  | 1.17143121  |
| C | -5.34168878 | -0.02771310 | -0.03317979 |
| H | -4.75192878 | -1.53144110 | -1.46378179 |
| H | -5.61962678 | 1.59402190  | 1.36157021  |
| H | -6.35725578 | -0.39903310 | 0.06775921  |
| C | 0.37696814  | -1.17654521 | 2.43547220  |
| H | 0.90976314  | -2.10122821 | 2.69353320  |
| H | 0.82853214  | -0.36402121 | 3.02563220  |
| C | 0.10328214  | -2.43807221 | -1.60842780 |

|    |             |             |             |
|----|-------------|-------------|-------------|
| H  | -0.15387986 | -2.22051221 | -2.65726880 |
| H  | 1.08318714  | -2.94462421 | -1.63412180 |
| C  | -1.11985886 | -1.30486321 | 2.75926520  |
| H  | -1.75954886 | -0.59271321 | 2.18252420  |
| H  | -1.50362786 | -2.30644421 | 2.52092020  |
| H  | -1.39044186 | -1.10235221 | 3.80617120  |
| C  | -0.94104686 | -3.39688721 | -1.00234480 |
| H  | -1.95499386 | -2.96356021 | -1.00949980 |
| H  | -1.02688286 | -4.36546221 | -1.52061780 |
| H  | -0.71515186 | -3.64540721 | 0.04919120  |
| La | 0.05204514  | -0.50523721 | 0.03400520  |

### Al\_2\_I

E(B3LYP/BS1) = -121.750195 au

H(B3LYP/BS1) = -121.633941 au

G(B3LYP/BS1) = -121.678778 au

E(B3LYP/BS2//B3LYP/BS1, solvent = dichloromethane) = -362.264566 au

E(M06/BS2//B3LYP/BS1, solvent = dichloromethane) = -362.115279 au

|    |             |             |             |
|----|-------------|-------------|-------------|
| Al | -0.00013100 | -0.00003400 | 0.00012500  |
| C  | -1.95653700 | -0.34237300 | -0.00043500 |
| H  | -2.25386400 | -0.95577800 | -0.86312600 |
| H  | -2.25866200 | -0.91414000 | 0.88906100  |
| H  | -2.56673300 | 0.56837400  | -0.02276200 |
| C  | 0.68179400  | 1.86541700  | 0.00037200  |
| H  | 1.77556200  | 1.93807600  | 0.02615200  |
| H  | 0.34064500  | 2.41170300  | -0.89099700 |
| H  | 0.29648700  | 2.43094200  | 0.86095200  |
| C  | 1.27486600  | -1.52295900 | -0.00006500 |
| H  | 1.94132800  | -1.48313800 | -0.87380400 |
| H  | 1.93486000  | -1.48904700 | 0.87882100  |
| H  | 0.79133600  | -2.50706000 | -0.00514800 |

### Ga\_2\_I

E(B3LYP/BS1) = -121.804569 au

H(B3LYP/BS1) = -121.689047 au

G(B3LYP/BS1) = -121.731195 au

E(B3LYP/BS2//B3LYP/BS1, solvent = dichloromethane) = -2044.696478 au

E(M06/BS2//B3LYP/BS1, solvent = dichloromethane) = -2044.490233 au

|    |             |             |             |
|----|-------------|-------------|-------------|
| C  | -1.49331700 | -1.31468200 | -0.00037900 |
| H  | -1.42043600 | -1.98812500 | -0.86487000 |
| H  | -1.44608000 | -1.95516900 | 0.89080200  |
| H  | -2.48332900 | -0.84666700 | -0.02261800 |
| C  | -0.39231600 | 1.95031300  | 0.00039500  |
| H  | 0.50739800  | 2.57439800  | 0.02627300  |
| H  | -0.96753900 | 2.22983100  | -0.89272400 |
| H  | -1.01539600 | 2.22308000  | 0.86267800  |
| C  | 1.88533500  | -0.63548500 | -0.00010500 |
| H  | 2.42538700  | -0.25033500 | -0.87554500 |
| H  | 2.42260500  | -0.25856600 | 0.88063100  |
| H  | 1.97556300  | -1.72699800 | -0.00499900 |
| Ga | 0.00011700  | -0.00007500 | 0.00002900  |

### Al\_2\_II

E(B3LYP/BS1) = -200.344050 au

H(B3LYP/BS1) = -200.170087 au  
 G(B3LYP/BS1) = -200.221397 au  
 E(B3LYP/BS2//B3LYP/BS1, solvent = dichloromethane) = -440.887694 au  
 E(M06/BS2//B3LYP/BS1, solvent = dichloromethane) = -440.668725 au

|    |             |             |             |
|----|-------------|-------------|-------------|
| Al | 0.67498400  | -0.00119000 | 0.02091200  |
| C  | 0.94861100  | -1.66304300 | -1.04937100 |
| H  | 0.54130800  | -1.59742200 | -2.06701800 |
| H  | 2.02693500  | -1.85219200 | -1.16438900 |
| H  | 0.52779100  | -2.56343600 | -0.58347000 |
| C  | 0.79640000  | -0.09468000 | 2.00903700  |
| H  | 0.31051700  | 0.74954400  | 2.51650900  |
| H  | 0.37343100  | -1.01680000 | 2.42949400  |
| H  | 1.85043700  | -0.07194800 | 2.32470100  |
| C  | 0.94186000  | 1.75750600  | -0.88434500 |
| H  | 0.51800500  | 2.60727000  | -0.33390100 |
| H  | 2.01972200  | 1.95985900  | -0.97958800 |
| H  | 0.53504300  | 1.78880000  | -1.90372600 |
| H  | -2.14563900 | 1.24206500  | -0.98401500 |
| H  | -2.07403000 | 1.24304500  | 0.86257700  |
| C  | -2.09697900 | -0.66903800 | -0.05964300 |
| C  | -2.09570700 | 0.67057100  | -0.06129300 |
| H  | -2.14763800 | -1.24230200 | -0.98118000 |
| H  | -2.07577600 | -1.23890300 | 0.86583700  |

## Ga\_2\_II

E(B3LYP/BS1) = -200.396580 au  
 H(B3LYP/BS1) = -200.222506 au  
 G(B3LYP/BS1) = -200.275899 au  
 E(B3LYP/BS2//B3LYP/BS1, solvent = dichloromethane) = -2123.317420 au  
 E(M06/BS2//B3LYP/BS1, solvent = dichloromethane) = -2123.041501 au

|    |             |             |             |
|----|-------------|-------------|-------------|
| C  | 0.78750200  | -1.67010600 | -1.05773600 |
| H  | 0.36112200  | -1.58865900 | -2.06484600 |
| H  | 1.86002200  | -1.87533700 | -1.18670200 |
| H  | 0.35286400  | -2.55354200 | -0.57553100 |
| C  | 0.63617200  | -0.09222400 | 2.00747200  |
| H  | 0.13836900  | 0.75702700  | 2.49112300  |
| H  | 0.19751100  | -1.01416100 | 2.40778200  |
| H  | 1.68376200  | -0.07208900 | 2.34021600  |
| C  | 0.78212100  | 1.76250600  | -0.89693300 |
| H  | 0.34486300  | 2.59544300  | -0.33404200 |
| H  | 1.85413000  | 1.98170300  | -1.00554200 |
| H  | 0.35593900  | 1.77460400  | -1.90730600 |
| H  | -2.39153000 | 1.24208000  | -0.98338800 |
| H  | -2.33667700 | 1.24285300  | 0.86367100  |
| C  | -2.35396400 | -0.66789800 | -0.05887000 |
| C  | -2.35294900 | 0.67012200  | -0.06019300 |
| H  | -2.39315900 | -1.24129200 | -0.98110800 |
| H  | -2.33827300 | -1.23857400 | 0.86626100  |
| Ga | 0.55863700  | -0.00078900 | 0.01506400  |

## TS<sub>Al-2</sub>

E(B3LYP/BS1) = -200.303110 au  
 H(B3LYP/BS1) = -200.129616 au  
 G(B3LYP/BS1) = -200.175170 au

E(B3LYP/BS2//B3LYP/BS1, solvent = dichloromethane) = -440.846406 au

E(M06/BS2//B3LYP/BS1, solvent = dichloromethane) = -440.632615 au

|    |             |             |             |
|----|-------------|-------------|-------------|
| Al | -0.47125700 | 0.04421900  | -0.15461900 |
| C  | -1.47017500 | -1.66480400 | -0.32338700 |
| H  | -0.80843300 | -2.52788900 | -0.47244700 |
| H  | -2.07135900 | -1.87136100 | 0.57281000  |
| H  | -2.16451200 | -1.64487500 | -1.17400100 |
| C  | -1.30219800 | 1.82144800  | 0.15977000  |
| H  | -0.55949100 | 2.61113100  | 0.33670600  |
| H  | -1.90948200 | 2.14559400  | -0.69614900 |
| H  | -1.96964600 | 1.81201700  | 1.03289300  |
| C  | 0.74957700  | -0.38985900 | 1.65723100  |
| H  | 1.55683200  | 0.09131500  | 2.20991900  |
| H  | -0.17751300 | -0.07747600 | 2.16601900  |
| H  | 0.83881000  | -1.47485900 | 1.74891900  |
| H  | 2.42954700  | -0.84139900 | 0.11398400  |
| H  | 2.27180100  | 0.95998300  | 0.30401700  |
| C  | 1.19231200  | 0.15191200  | -1.39296100 |
| C  | 1.86522100  | 0.05283800  | -0.13186300 |
| H  | 1.25708000  | -0.70691600 | -2.05784100 |
| H  | 1.22428300  | 1.12068000  | -1.88752900 |

### TS<sub>Ga-2</sub>

E(B3LYP/BS1) = -200.349181 au

H(B3LYP/BS1) = -200.175508 au

G(B3LYP/BS1) = -200.222110 au

E(B3LYP/BS2//B3LYP/BS1, solvent = dichloromethane) = -2123.266754 au

E(M06/BS2//B3LYP/BS1, solvent = dichloromethane) = -2122.997319 au

|    |             |             |             |
|----|-------------|-------------|-------------|
| C  | -1.30575300 | -1.72339800 | -0.24811600 |
| H  | -0.60208000 | -2.54331000 | -0.43286200 |
| H  | -1.84808900 | -1.95319200 | 0.67743500  |
| H  | -2.03583100 | -1.72543300 | -1.06658600 |
| C  | -1.20511500 | 1.79922300  | 0.25920100  |
| H  | -0.44904800 | 2.57948700  | 0.40880100  |
| H  | -1.85078300 | 2.12416500  | -0.56586500 |
| H  | -1.82486700 | 1.76507800  | 1.16418000  |
| C  | 0.93541200  | -0.39508100 | 1.69602000  |
| H  | 1.77874600  | 0.08426000  | 2.19396600  |
| H  | 0.04186700  | -0.08940600 | 2.26017800  |
| H  | 1.03507600  | -1.48058100 | 1.76609400  |
| H  | 2.55317900  | -0.81200300 | 0.07006000  |
| H  | 2.37953000  | 0.98820500  | 0.27784800  |
| C  | 1.26787800  | 0.17808700  | -1.39735300 |
| C  | 1.97488800  | 0.07870400  | -0.15396100 |
| H  | 1.32547300  | -0.67370800 | -2.07125900 |
| H  | 1.26912500  | 1.15089800  | -1.88412200 |
| Ga | -0.37987600 | 0.03097900  | -0.12040700 |

### Al<sub>2</sub> III

E(B3LYP/BS1) = -200.370117 au

H(B3LYP/BS1) = -200.195791 au

G(B3LYP/BS1) = -200.238950 au

E(B3LYP/BS2//B3LYP/BS1, solvent = dichloromethane) = -440.907945 au

E(M06/BS2//B3LYP/BS1, solvent = dichloromethane) = -440.690131 au

|    |             |             |             |
|----|-------------|-------------|-------------|
| Al | -1.08406700 | -0.01125600 | 0.12417900  |
| C  | -1.86139200 | 1.80692000  | -0.06884000 |
| H  | -1.14642500 | 2.61235100  | 0.09279900  |
| H  | -2.29850300 | 1.95462000  | -1.06036400 |
| H  | -2.68077000 | 1.95931300  | 0.64137300  |
| C  | -2.23352400 | -1.59811000 | -0.20497700 |
| H  | -1.67459900 | -2.45890100 | -0.57411000 |
| H  | -2.70855000 | -1.92273000 | 0.72834900  |
| H  | -3.04379200 | -1.40358400 | -0.90790600 |
| C  | 0.82885800  | -0.23471500 | 0.64825800  |
| C  | 1.83417600  | 0.08370400  | -0.48529300 |
| C  | 3.30151900  | -0.05823500 | -0.05835900 |
| H  | 1.05217700  | 0.42480800  | 1.50261100  |
| H  | 1.01443300  | -1.25747700 | 1.00954900  |
| H  | 3.53139300  | 0.61463700  | 0.77710800  |
| H  | 3.51480600  | -1.08178400 | 0.27389900  |
| H  | 1.67182200  | 1.10654300  | -0.85595900 |
| H  | 1.65387900  | -0.57753200 | -1.34627200 |
| H  | 3.98918400  | 0.17868300  | -0.88013500 |

### Ga\_2\_III

E(B3LYP/BS1) = -200.425837 au

H(B3LYP/BS1) = -200.249062 au

G(B3LYP/BS1) = -200.300515 au

E(B3LYP/BS2//B3LYP/BS1, solvent = dichloromethane) = -2123.34199 au

E(M06/BS2//B3LYP/BS1, solvent = dichloromethane) = -2123.068745 au

|    |             |             |             |
|----|-------------|-------------|-------------|
| C  | 1.22877600  | 1.93060100  | 0.00604900  |
| H  | 0.48854700  | 2.50769000  | -0.56051100 |
| H  | 1.20253600  | 2.31462100  | 1.03604300  |
| H  | 2.22278200  | 2.16006800  | -0.39424100 |
| C  | 2.33759100  | -1.32490300 | -0.01596600 |
| H  | 2.01321800  | -2.36032200 | 0.13443900  |
| H  | 2.86818100  | -1.28200500 | -0.97736500 |
| H  | 3.08106700  | -1.08738800 | 0.75591400  |
| C  | -1.05018900 | -0.68648500 | 0.03665500  |
| C  | -2.17212300 | 0.36428500  | -0.04343400 |
| C  | -3.58181300 | -0.24014500 | 0.00476400  |
| H  | -1.16585700 | -1.41780200 | -0.77988700 |
| H  | -1.17047900 | -1.28615600 | 0.95434800  |
| H  | -3.74003600 | -0.93582400 | -0.82899100 |
| H  | -3.73662000 | -0.80174700 | 0.93474600  |
| H  | -2.06751200 | 0.95172800  | -0.96681500 |
| H  | -2.06528800 | 1.08754200  | 0.77748000  |
| H  | -4.35798200 | 0.53333700  | -0.05253400 |
| Ga | 0.83400000  | -0.02077000 | 0.00125700  |

### Al\_2\_IV

E(B3LYP/BS1) = -199.769475 au

H(B3LYP/BS1) = -199.608556 au

G(B3LYP/BS1) = -199.653062 au

E(B3LYP/BS2//B3LYP/BS1, solvent = dichloromethane) = -440.385367 au

E(M06/BS2//B3LYP/BS1, solvent = dichloromethane) = -440.175152 au

|    |            |             |             |
|----|------------|-------------|-------------|
| Al | 0.47448800 | -0.01667200 | -0.00038900 |
| C  | 1.97999800 | -1.41159100 | 0.00051300  |

|   |             |             |             |
|---|-------------|-------------|-------------|
| H | 2.63810700  | -1.32543700 | -0.88039500 |
| H | 2.63851400  | -1.32329700 | 0.88090900  |
| H | 1.60276200  | -2.44687200 | 0.00186100  |
| C | 1.27946100  | 1.87051300  | -0.00062200 |
| H | 1.91535900  | 2.06028800  | 0.88024300  |
| H | 1.91511300  | 2.06148900  | -0.88138300 |
| H | 0.51070900  | 2.65981900  | 0.00007000  |
| C | -1.16544500 | -0.28710200 | 1.23601800  |
| C | -1.16580100 | -0.28880300 | -1.23558400 |
| C | -2.03696600 | 0.08983600  | 0.00006400  |
| H | -1.42654800 | 0.28269900  | 2.14203600  |
| H | -1.31898100 | -1.35218100 | 1.48249000  |
| H | -3.06054000 | -0.34499100 | 0.00049300  |
| H | -2.18396500 | 1.18272400  | -0.00067500 |
| H | -1.42708800 | 0.27962200  | -2.14241500 |
| H | -1.31926700 | -1.35424900 | -1.48051600 |

### Al\_2\_V

E(B3LYP/BS1) = -240.312225 au

H(B3LYP/BS1) = -240.099545 au

G(B3LYP/BS1) = -240.153538 au

E(B3LYP/BS2//B3LYP/BS1, solvent = dichloromethane) = -480.939883 au

E(M06/BS2//B3LYP/BS1, solvent = dichloromethane) = -480.687327 au

|    |             |             |             |
|----|-------------|-------------|-------------|
| Al | 0.00022200  | 0.56836600  | -0.00013200 |
| C  | 0.95071700  | 1.75124200  | -1.39212700 |
| H  | 0.24730900  | 2.39081100  | -1.95151200 |
| H  | 1.68848300  | 2.43595700  | -0.94089200 |
| H  | 1.50069100  | 1.17118800  | -2.15215300 |
| C  | -0.94977600 | 1.75005200  | 1.39318700  |
| H  | -0.24599400 | 2.38905200  | 1.95275700  |
| H  | -1.68765200 | 2.43522700  | 0.94279900  |
| H  | -1.49953100 | 1.16951100  | 2.15297900  |
| C  | 1.37688500  | -0.62663200 | 0.97377200  |
| C  | -1.37737900 | -0.62549700 | -0.97437000 |
| H  | 0.86973700  | -1.20678400 | 1.76568500  |
| H  | 2.09686400  | 0.01088700  | 1.51805200  |
| H  | -2.09712800 | 0.01277200  | -1.51807900 |
| H  | -0.87113300 | -1.20584900 | -1.76671500 |
| C  | 2.16964200  | -1.60680100 | 0.08931700  |
| C  | -2.17043100 | -1.60530500 | -0.08976200 |
| H  | 2.73732900  | -1.07581800 | -0.68886400 |
| H  | 2.89943700  | -2.23303600 | 0.63797700  |
| H  | 1.49982500  | -2.30043300 | -0.44004700 |
| H  | -1.50089600 | -2.30015200 | 0.43836700  |
| H  | -2.73663400 | -1.07420700 | 0.68941600  |
| H  | -2.90155300 | -2.23023400 | -0.63815300 |

### Ga\_2\_IV

E(B3LYP/BS1) = -199.816548 au

H(B3LYP/BS1) = -199.655556 au

G(B3LYP/BS1) = -199.701175 au

E(B3LYP/BS2//B3LYP/BS1, solvent = dichloromethane) = -2122.806929 au

E(M06/BS2//B3LYP/BS1, solvent = dichloromethane) = -2122.541815 au

|   |             |             |            |
|---|-------------|-------------|------------|
| C | -1.84195800 | -1.43724800 | 0.00024200 |
|---|-------------|-------------|------------|

|    |             |             |             |
|----|-------------|-------------|-------------|
| H  | -2.49669500 | -1.35724900 | 0.88267400  |
| H  | -2.49711800 | -1.35753100 | -0.88190100 |
| H  | -1.43749400 | -2.46081400 | 0.00031600  |
| C  | -1.20663100 | 1.86468300  | -0.00017300 |
| H  | -1.84389800 | 2.03599900  | -0.88231400 |
| H  | -1.84343200 | 2.03575700  | 0.88235700  |
| H  | -0.44916100 | 2.66311800  | -0.00023700 |
| C  | 1.30064500  | -0.26891600 | -1.23140200 |
| C  | 1.30042800  | -0.26830800 | 1.23160800  |
| C  | 2.17634800  | 0.09938500  | 0.00008900  |
| H  | 1.54785500  | 0.30855200  | -2.13635400 |
| H  | 1.44127600  | -1.33245100 | -1.48833700 |
| H  | 3.19511800  | -0.34650600 | 0.00027600  |
| H  | 2.33452700  | 1.19057500  | -0.00017200 |
| H  | 1.54745100  | 0.30967400  | 2.13628400  |
| H  | 1.44107700  | -1.33169200 | 1.48915800  |
| Ga | -0.36491900 | -0.00951600 | -0.00012700 |

### Ga\_2\_V

E(B3LYP/BS1) = -240.360001 au

H(B3LYP/BS1) = -240.147244 au

G(B3LYP/BS1) = -240.202460 au

E(B3LYP/BS2//B3LYP/BS1, solvent = dichloromethane) = -2163.362513 au

E(M06/BS2//B3LYP/BS1, solvent = dichloromethane) = -2163.055064 au

|    |             |             |             |
|----|-------------|-------------|-------------|
| C  | -0.94696400 | -1.63076200 | -1.39615300 |
| H  | -0.23720200 | -2.26667400 | -1.94951200 |
| H  | -1.68314300 | -2.31293600 | -0.94104800 |
| H  | -1.49335600 | -1.04704100 | -2.15442500 |
| C  | 0.94751500  | -1.62965100 | 1.39672900  |
| H  | 0.23799400  | -2.26581300 | 1.95011800  |
| H  | 1.68428300  | -2.31153700 | 0.94214500  |
| H  | 1.49326900  | -1.04526900 | 2.15494600  |
| C  | -1.38534700 | 0.75189000  | 0.97428200  |
| C  | 1.38514700  | 0.75203000  | -0.97458200 |
| H  | -0.87759600 | 1.33034000  | 1.76547900  |
| H  | -2.10308800 | 0.10912000  | 1.51299300  |
| H  | 2.10310200  | 0.10928400  | -1.51304000 |
| H  | 0.87752100  | 1.33033400  | -1.76596300 |
| C  | -2.17387400 | 1.72834000  | 0.08452400  |
| C  | 2.17334100  | 1.72868700  | -0.08474300 |
| H  | -2.73517100 | 1.19499600  | -0.69643200 |
| H  | -2.90798000 | 2.35144100  | 0.63073700  |
| H  | -1.50235100 | 2.42346700  | -0.44032400 |
| H  | 1.50159400  | 2.42376300  | 0.43988800  |
| H  | 2.73454600  | 1.19550600  | 0.69638500  |
| H  | 2.90746700  | 2.35184900  | -0.63085800 |
| Ga | 0.00003900  | -0.44432300 | -0.00004600 |

### Al\_3\_I

E(B3LYP/BS1) = -500.838036 au

H(B3LYP/BS1) = -500.599005 au

G(B3LYP/BS1) = -500.651261 au

E(B3LYP/BS2//B3LYP/BS1, solvent = dichloromethane) = -741.509837 au

E(M06/BS2//B3LYP/BS1, solvent = dichloromethane) = -741.084232 au

|    |             |             |             |
|----|-------------|-------------|-------------|
| C  | -0.43665300 | 0.73760400  | -0.00044900 |
| C  | -0.43639200 | -0.73755300 | -0.00051900 |
| C  | -1.58152100 | -1.55345800 | 0.00049700  |
| C  | -1.58201100 | 1.55311700  | 0.00056200  |
| C  | -2.94085700 | -1.24332200 | 0.00130300  |
| C  | -2.94127100 | 1.24246900  | 0.00110400  |
| C  | -3.56924800 | -0.00051700 | 0.00155000  |
| H  | -1.37684000 | -2.61781400 | 0.00076200  |
| H  | -1.37773600 | 2.61755700  | 0.00076500  |
| H  | -3.60102000 | -2.10738400 | 0.00192700  |
| H  | -3.60172400 | 2.10631300  | 0.00142400  |
| H  | -4.65540600 | -0.00067600 | 0.00213900  |
| N  | 0.81442200  | -1.29110100 | -0.00158700 |
| N  | 0.81396200  | 1.29162200  | -0.00155500 |
| Al | 2.13619700  | 0.00050500  | -0.00161000 |
| C  | 1.00568300  | -2.74508600 | -0.00222900 |
| C  | 1.00465600  | 2.74569700  | -0.00217600 |
| C  | 4.07639400  | -0.00032500 | 0.00457800  |
| H  | 0.57090800  | -3.20972000 | 0.89036800  |
| H  | 0.56696900  | -3.20934800 | -0.89307500 |
| H  | 2.07654600  | -2.96169400 | -0.00435300 |
| H  | 0.56613600  | 3.20974000  | -0.89324100 |
| H  | 0.56930900  | 3.21017500  | 0.89020100  |
| H  | 2.07543800  | 2.96271400  | -0.00384100 |
| H  | 4.47827200  | -0.88264600 | -0.50580100 |
| H  | 4.47945100  | 0.88566200  | -0.49843300 |
| H  | 4.46777600  | -0.00485100 | 1.02876300  |

### Ga 3 I

E (B3LYP/BS1) = -500.881914 au

H(B3LYP/BS1) = -500.643036 au

G(B3LYP/BS1) = -500.696366 au

E(B3LYP/BS2//B3LYP/BS1, solvent = dichloromethane) = -2423.922970 au

E(M06/BS2//B3LYP/BS1, solvent = dichloromethane) = -2423.439037 au

|   |             |             |             |
|---|-------------|-------------|-------------|
| C | -0.76289800 | 0.73782600  | -0.00016100 |
| C | -0.76278200 | -0.73786400 | -0.00017400 |
| C | -1.90923000 | -1.55277300 | 0.00072800  |
| C | -1.90945000 | 1.55256300  | 0.00064000  |
| C | -3.26842200 | -1.24290700 | 0.00134500  |
| C | -3.26860700 | 1.24249800  | 0.00122400  |
| C | -3.89692500 | -0.00024500 | 0.00146500  |
| H | -1.70536700 | -2.61723500 | 0.00102100  |
| H | -1.70574400 | 2.61705700  | 0.00083800  |
| H | -3.92837400 | -2.10712100 | 0.00187900  |
| H | -3.92867900 | 2.10662100  | 0.00163700  |
| H | -4.98309700 | -0.00032700 | 0.00197400  |
| N | 0.48384800  | -1.29525700 | -0.00105800 |
| N | 0.48365200  | 1.29543900  | -0.00102400 |
| C | 0.67715700  | -2.74781000 | -0.00171800 |
| C | 0.67666900  | 2.74803500  | -0.00167100 |
| C | 3.76435700  | -0.00037100 | 0.00439000  |
| H | 0.24237500  | -3.21219100 | 0.89100800  |
| H | 0.23843600  | -3.21193000 | -0.89264100 |
| H | 1.74792000  | -2.96285300 | -0.00376000 |
| H | 0.23793200  | 3.21206800  | -0.89263100 |



|    |            |             |             |
|----|------------|-------------|-------------|
| H  | 0.24171100 | 3.21231500  | 0.89102200  |
| H  | 1.74738700 | 2.96330300  | -0.00361400 |
| H  | 4.15294400 | -0.88563000 | -0.50765400 |
| H  | 4.15376100 | 0.88875000  | -0.50025900 |
| H  | 4.14248100 | -0.00483200 | 1.03194100  |
| Ga | 1.82369700 | 0.00022700  | -0.00137400 |

### Al\_3\_II

E(B3LYP/BS1) = -579.439211 au

H(B3LYP/BS1) = -579.141925 au

G(B3LYP/BS1) = -579.206659 au

E(B3LYP/BS2//B3LYP/BS1, solvent = dichloromethane) = -820.136392 au

E(M06/BS2//B3LYP/BS1, solvent = dichloromethane) = -819.641657 au

|    |             |             |             |
|----|-------------|-------------|-------------|
| C  | 0.83049400  | -0.74246900 | -0.17432200 |
| C  | 0.85538200  | 0.73517400  | -0.15795100 |
| C  | 2.00621300  | 1.52814000  | 0.01041600  |
| C  | 1.95627700  | -1.57644900 | -0.03486400 |
| C  | 3.34758500  | 1.19287400  | 0.19062300  |
| C  | 3.30769200  | -1.28967000 | 0.15186900  |
| C  | 3.95204400  | -0.05961400 | 0.25766100  |
| H  | 1.82266400  | 2.59627200  | -0.00305300 |
| H  | 1.73902300  | -2.63726500 | -0.08139100 |
| H  | 4.01464300  | 2.04573600  | 0.29334400  |
| H  | 3.94758000  | -2.16602400 | 0.22569100  |
| H  | 5.02799900  | -0.07920800 | 0.40423300  |
| N  | -0.36889500 | 1.30744700  | -0.33215500 |
| N  | -0.41335400 | -1.26982900 | -0.35047300 |
| Al | -1.73662900 | 0.04247200  | -0.49263500 |
| C  | -0.52416600 | 2.76153600  | -0.39082200 |
| C  | -0.61670900 | -2.71698400 | -0.43105400 |
| C  | -3.38215700 | 0.11626200  | -1.53421200 |
| H  | -0.23291500 | 3.24505600  | 0.55039700  |
| H  | 0.06788500  | 3.19848800  | -1.20374000 |
| H  | -1.57349100 | 2.99998800  | -0.58229700 |
| H  | -0.05596300 | -3.15959800 | -1.26302100 |
| H  | -0.32249500 | -3.22573200 | 0.49582600  |
| H  | -1.67686000 | -2.91880700 | -0.60479700 |
| H  | -3.15413600 | 0.26675600  | -2.59657300 |
| H  | -3.96489800 | -0.80942400 | -1.45733300 |
| H  | -4.03854800 | 0.93784500  | -1.22319300 |
| C  | -2.33399300 | 0.45457300  | 2.09642600  |
| H  | -2.65905400 | 1.49216100  | 2.05050400  |
| H  | -1.34775600 | 0.27238100  | 2.51553600  |
| C  | -3.15239500 | -0.55433900 | 1.74895500  |
| H  | -4.16444300 | -0.37426000 | 1.39599500  |
| H  | -2.85492200 | -1.59404000 | 1.87017400  |

### Ga\_3\_II

E(B3LYP/BS1) = -579.479243 au

H(B3LYP/BS1) = -579.182130 au

G(B3LYP/BS1) = -579.248918 au

E(B3LYP/BS2//B3LYP/BS1, solvent = dichloromethane) = -2502.545009 au

E(M06/BS2//B3LYP/BS1, solvent = dichloromethane) = -2501.991775 au

|   |            |             |             |
|---|------------|-------------|-------------|
| C | 1.06921500 | -0.74353700 | -0.15269600 |
|---|------------|-------------|-------------|

|    |             |             |             |
|----|-------------|-------------|-------------|
| C  | 1.08911200  | 0.73465400  | -0.13160300 |
| C  | 2.23879800  | 1.53011800  | 0.03634900  |
| C  | 2.19855400  | -1.57364400 | -0.01698400 |
| C  | 3.58164900  | 1.19898900  | 0.21054200  |
| C  | 3.54962200  | -1.28351600 | 0.16574100  |
| C  | 4.19044200  | -0.05177300 | 0.27188300  |
| H  | 2.05186600  | 2.59770300  | 0.02713300  |
| H  | 1.98442200  | -2.63506000 | -0.06431700 |
| H  | 4.24614900  | 2.05381200  | 0.31322300  |
| H  | 4.19216500  | -2.15820500 | 0.23564000  |
| H  | 5.26698700  | -0.06825500 | 0.41449900  |
| N  | -0.13344300 | 1.30798300  | -0.29958300 |
| N  | -0.16920000 | -1.27916900 | -0.32865700 |
| C  | -0.29813800 | 2.76096900  | -0.33974700 |
| C  | -0.37260200 | -2.72590500 | -0.40223300 |
| C  | -3.25092100 | 0.09136100  | -1.32994300 |
| H  | -0.00235100 | 3.23322500  | 0.60564500  |
| H  | 0.28597400  | 3.21051700  | -1.15153700 |
| H  | -1.35001300 | 2.99526500  | -0.51938200 |
| H  | 0.18579800  | -3.17062300 | -1.23462700 |
| H  | -0.07323700 | -3.22904400 | 0.52598100  |
| H  | -1.43312300 | -2.92885300 | -0.56911400 |
| H  | -3.12281900 | 0.26918900  | -2.40292600 |
| H  | -3.78702000 | -0.85476000 | -1.20588900 |
| H  | -3.87778600 | 0.89191000  | -0.92498500 |
| C  | -2.16628600 | 0.52157900  | 2.25837900  |
| H  | -2.68906700 | 1.46505500  | 2.11451500  |
| H  | -1.15642200 | 0.58110000  | 2.65608300  |
| C  | -2.77144700 | -0.65764800 | 2.04371400  |
| H  | -3.80288000 | -0.71746400 | 1.70544400  |
| H  | -2.27117600 | -1.59986200 | 2.25490300  |
| Ga | -1.51216000 | 0.03396000  | -0.45364600 |

### TS<sub>Al-3</sub>

E(B3LYP/BS1) = -579.389026 au

H(B3LYP/BS1) = -579.093094 au

G(B3LYP/BS1) = -579.153018 au

E(B3LYP/BS2//B3LYP/BS1, solvent = dichloromethane) = -820.088300 au

E(M06/BS2//B3LYP/BS1, solvent = dichloromethane) = -819.598882 au

|    |             |             |             |
|----|-------------|-------------|-------------|
| C  | 0.92791200  | 0.74131500  | -0.01674200 |
| C  | 0.92969400  | -0.73800000 | -0.02784300 |
| C  | 2.08117400  | -1.54840400 | -0.02317900 |
| C  | 2.07762000  | 1.55445200  | 0.00074200  |
| C  | 3.43975800  | -1.23591600 | -0.00629300 |
| C  | 3.43675500  | 1.24518700  | 0.01296600  |
| C  | 4.06994500  | 0.00523600  | 0.01030200  |
| H  | 1.88119500  | -2.61347700 | -0.03488000 |
| H  | 1.87477200  | 2.61906800  | 0.00519000  |
| H  | 4.09934900  | -2.10076900 | -0.00697400 |
| H  | 4.09432200  | 2.11149200  | 0.02565300  |
| H  | 5.15590400  | 0.00645800  | 0.02120700  |
| N  | -0.31301400 | -1.29506900 | -0.04544100 |
| N  | -0.31598400 | 1.29480200  | -0.02637100 |
| Al | -1.65723200 | -0.00246400 | -0.09006900 |
| C  | -0.49266900 | -2.74580700 | -0.06843000 |

|   |             |             |             |
|---|-------------|-------------|-------------|
| C | -0.50008300 | 2.74529500  | -0.02895600 |
| C | -2.82072800 | -0.08639300 | 1.67135000  |
| H | -0.04284700 | -3.19920000 | -0.96035700 |
| H | -0.06358500 | -3.22462700 | 0.82044700  |
| H | -1.56186200 | -2.97417000 | -0.08480700 |
| H | -0.07107800 | 3.21334400  | 0.86572400  |
| H | -0.05316000 | 3.21284800  | -0.91502500 |
| H | -1.57006200 | 2.97073600  | -0.03977100 |
| H | -2.57178100 | -1.11044500 | 1.97981100  |
| H | -2.11228000 | 0.61972800  | 2.13795200  |
| H | -3.79037300 | 0.15403800  | 2.10503000  |
| C | -3.18069200 | 0.02836200  | -1.40769900 |
| H | -3.23619100 | -0.88881100 | -1.99435900 |
| H | -3.18579700 | 0.94106700  | -2.00358500 |
| C | -3.96626900 | 0.05717400  | -0.20017700 |
| H | -4.50023400 | -0.82951900 | 0.12896600  |
| H | -4.41379400 | 0.99112600  | 0.12709500  |

### TS<sub>Ga-3</sub>

E(B3LYP/BS1) = -579.416971 au

H(B3LYP/BS1) = -579.121436 au

G(B3LYP/BS1) = -579.182830 au

E(B3LYP/BS2//B3LYP/BS1, solvent = dichloromethane) = -2502.478325 au

E(M06/BS2//B3LYP/BS1, solvent = dichloromethane) = -2501.931086 au

|   |             |             |             |
|---|-------------|-------------|-------------|
| C | 1.15272800  | 0.74218100  | -0.02045000 |
| C | 1.15260300  | -0.73859300 | -0.03068300 |
| C | 2.30524000  | -1.54892800 | -0.01723500 |
| C | 2.30569700  | 1.55200700  | 0.00551900  |
| C | 3.66381100  | -1.23873100 | 0.01056700  |
| C | 3.66406700  | 1.24121000  | 0.02903600  |
| C | 4.29647400  | 0.00100600  | 0.03227200  |
| H | 2.10452800  | -2.61378600 | -0.03046400 |
| H | 2.10504500  | 2.61698200  | 0.00804100  |
| H | 4.32138200  | -2.10512800 | 0.01543300  |
| H | 4.32188700  | 2.10724800  | 0.04691700  |
| H | 5.38225900  | 0.00073400  | 0.05242500  |
| N | -0.08446000 | -1.30165200 | -0.05785100 |
| N | -0.08424800 | 1.30515700  | -0.04048200 |
| C | -0.26699900 | -2.75085700 | -0.08351800 |
| C | -0.26685800 | 2.75473200  | -0.05012800 |
| C | -2.55365200 | -0.07690500 | 1.75747100  |
| H | 0.18978800  | -3.20312300 | -0.97260000 |
| H | 0.15584000  | -3.23047000 | 0.80803600  |
| H | -1.33592600 | -2.97751000 | -0.10790000 |
| H | 0.15457800  | 3.22468400  | 0.84726700  |
| H | 0.19112400  | 3.21730900  | -0.93326200 |
| H | -1.33582200 | 2.98158800  | -0.07301500 |
| H | -2.28906100 | -1.09530700 | 2.06582400  |
| H | -1.85757200 | 0.64443300  | 2.21164500  |
| H | -3.53153900 | 0.15076100  | 2.18040300  |
| C | -3.02374400 | 0.02289500  | -1.35395400 |
| H | -3.09793500 | -0.89451600 | -1.93692700 |
| H | -3.06121500 | 0.93495000  | -1.94852600 |
| C | -3.75963800 | 0.04701700  | -0.10979600 |
| H | -4.26459000 | -0.84646500 | 0.24479500  |

|    |             |            |             |
|----|-------------|------------|-------------|
| H  | -4.19808200 | 0.97836200 | 0.23545700  |
| Ga | -1.44490600 | 0.00137100 | -0.09805900 |

### Al\_3\_III

E(B3LYP/BS1) = -579.460290 au

H(B3LYP/BS1) = -579.159798 au

G(B3LYP/BS1) = -579.221459 au

E(B3LYP/BS2//B3LYP/BS1, solvent = dichloromethane) = -820.154291 au

E(M06/BS2//B3LYP/BS1, solvent = dichloromethane) = -819.659640 au

|    |             |             |             |
|----|-------------|-------------|-------------|
| C  | 1.22454300  | 0.73769900  | -0.05923200 |
| C  | 1.22446500  | -0.73768600 | -0.05925600 |
| C  | 2.36139500  | -1.55341300 | 0.07998600  |
| C  | 2.36150500  | 1.55329700  | 0.08040100  |
| C  | 3.71028900  | -1.24305100 | 0.24742100  |
| C  | 3.71037200  | 1.24279100  | 0.24789100  |
| C  | 4.33371800  | -0.00015900 | 0.32564600  |
| H  | 2.15858800  | -2.61782800 | 0.05419700  |
| H  | 2.15878300  | 2.61773500  | 0.05497800  |
| H  | 4.36559600  | -2.10706000 | 0.32816500  |
| H  | 4.36571100  | 2.10673700  | 0.32904000  |
| H  | 5.41159100  | -0.00022500 | 0.45962000  |
| N  | -0.01663500 | -1.29000300 | -0.21137300 |
| N  | -0.01651000 | 1.29013900  | -0.21146700 |
| Al | -1.33459400 | 0.00013700  | -0.37388000 |
| C  | -0.20653200 | -2.74368500 | -0.23579500 |
| C  | -0.20623700 | 2.74384000  | -0.23600500 |
| H  | 0.33603300  | -3.20798000 | -1.06750300 |
| H  | 0.11779600  | -3.20899200 | 0.70231800  |
| H  | -1.26938300 | -2.96001600 | -0.36717700 |
| H  | 0.11769300  | 3.20915400  | 0.70224500  |
| H  | 0.33676500  | 3.20804400  | -1.06747600 |
| H  | -1.26900400 | 2.96027400  | -0.36789800 |
| C  | -3.27487900 | 0.00023000  | -0.58151900 |
| C  | -4.07708000 | -0.00008500 | 0.74762900  |
| C  | -5.59102300 | -0.00017000 | 0.50773900  |
| H  | -6.13723500 | -0.00047800 | 1.45704500  |
| H  | -5.90076100 | 0.88588200  | -0.05833300 |
| H  | -5.90059400 | -0.88597600 | -0.05881200 |
| H  | -3.80659300 | 0.87736600  | 1.35052800  |
| H  | -3.80645400 | -0.87775400 | 1.35014200  |
| H  | -3.56000600 | 0.87393900  | -1.18490200 |
| H  | -3.55999800 | -0.87320200 | -1.18531500 |

### Ga\_3\_III

E(B3LYP/BS1) = -579.505027 au

H(B3LYP/BS1) = -579.204737 au

G(B3LYP/BS1) = -579.267392 au

E(B3LYP/BS2//B3LYP/BS1, solvent = dichloromethane) = -2502.569294 au

E(M06/BS2//B3LYP/BS1, solvent = dichloromethane) = -2502.016922 au

|   |            |             |             |
|---|------------|-------------|-------------|
| C | 1.40748600 | 0.73794900  | -0.01977500 |
| C | 1.40743900 | -0.73796600 | -0.01981000 |
| C | 2.54684200 | -1.55291700 | 0.10931400  |
| C | 2.54692200 | 1.55282400  | 0.10951900  |
| C | 3.89700000 | -1.24292000 | 0.26432100  |

|    |             |             |             |
|----|-------------|-------------|-------------|
| C  | 3.89705900  | 1.24273700  | 0.26453100  |
| C  | 4.52134100  | -0.00011200 | 0.33664000  |
| H  | 2.34410100  | -2.61741100 | 0.08547100  |
| H  | 2.34423200  | 2.61733200  | 0.08583300  |
| H  | 4.55270100  | -2.10715800 | 0.33906700  |
| H  | 4.55279700  | 2.10693300  | 0.33945100  |
| H  | 5.60041900  | -0.00014800 | 0.46057400  |
| N  | 0.16950000  | -1.29352600 | -0.16032200 |
| N  | 0.16959400  | 1.29359600  | -0.16034500 |
| C  | -0.02312100 | -2.74572500 | -0.18361700 |
| C  | -0.02291900 | 2.74580900  | -0.18364800 |
| H  | 0.51215900  | -3.21021200 | -1.02002400 |
| H  | 0.30930900  | -3.21141600 | 0.75156800  |
| H  | -1.08706000 | -2.96040600 | -0.30571900 |
| H  | 0.30936800  | 3.21146000  | 0.75160900  |
| H  | 0.51255400  | 3.21027000  | -1.01994400 |
| H  | -1.08681900 | 2.96057000  | -0.30595000 |
| C  | -3.11674500 | 0.00014400  | -0.50842500 |
| C  | -3.89924900 | -0.00018900 | 0.82812400  |
| C  | -5.41507500 | -0.00007500 | 0.59777900  |
| H  | -5.95271000 | -0.00030600 | 1.55176400  |
| H  | -5.72956200 | 0.88619300  | 0.03480900  |
| H  | -5.72962400 | -0.88602600 | 0.03434500  |
| H  | -3.62251500 | 0.87767600  | 1.42668900  |
| H  | -3.62257400 | -0.87838700 | 1.42623100  |
| H  | -3.39091700 | 0.87697200  | -1.10894400 |
| H  | -3.39093200 | -0.87637400 | -1.10938700 |
| Ga | -1.17033800 | 0.00008300  | -0.31427400 |

### Al 3 IV

E(B3LYP/BS1) = -579.026198 au

H(B3LYP/BS1) = -578.741024 au

G(B3LYP/BS1) = -578.800007 au

E(B3LYP/BS2//B3LYP/BS1, solvent = dichloromethane) = -819.678123 au

E(M06/BS2//B3LYP/BS1, solvent = dichloromethane) = -819.192125 au

|    |             |             |             |
|----|-------------|-------------|-------------|
| C  | -1.01211700 | 0.74897000  | 0.00005800  |
| C  | -0.94979100 | -0.73995900 | -0.00005900 |
| C  | -2.07623100 | -1.59922000 | -0.00031500 |
| C  | -2.20548500 | 1.51061800  | 0.00024000  |
| C  | -3.44285200 | -1.34057100 | -0.00023900 |
| C  | -3.54674100 | 1.13814300  | 0.00029700  |
| C  | -4.12923100 | -0.12726900 | 0.00008700  |
| H  | -1.82964700 | -2.65498200 | -0.00058900 |
| H  | -2.04898600 | 2.58343900  | 0.00041200  |
| H  | -4.06736100 | -2.23272400 | -0.00043100 |
| H  | -4.24325000 | 1.97529100  | 0.00054100  |
| H  | -5.21487500 | -0.17271400 | 0.00016900  |
| N  | 0.30068300  | -1.21966600 | -0.00000200 |
| N  | 0.19558500  | 1.33125800  | -0.00005800 |
| Al | 1.71337500  | 0.11598100  | 0.00012400  |
| C  | 0.55731400  | -2.65273500 | -0.00018100 |
| C  | 0.33000000  | 2.78097400  | -0.00010100 |
| H  | 0.14185400  | -3.14627200 | 0.88942300  |
| H  | 0.14233900  | -3.14595900 | -0.89018800 |
| H  | 1.63782500  | -2.81692300 | 0.00009800  |

|   |             |             |             |
|---|-------------|-------------|-------------|
| H | -0.12553500 | 3.23780200  | -0.88973400 |
| H | -0.12504900 | 3.23782500  | 0.88977100  |
| H | 1.39286000  | 3.03630900  | -0.00040700 |
| C | 3.27731500  | 0.11044400  | 1.25198800  |
| C | 3.27723900  | 0.11189200  | -1.25173100 |
| C | 4.13292700  | -0.29094900 | -0.00011300 |
| H | 3.40408800  | -0.55232100 | -2.11407800 |
| H | 3.54689200  | 1.12330600  | -1.59034900 |
| H | 3.40399600  | -0.55495100 | 2.11345800  |
| H | 3.54696800  | 1.12136600  | 1.59204700  |
| H | 5.14053600  | 0.15181000  | -0.00013900 |
| H | 4.27550600  | -1.38123300 | -0.00077100 |

### Al\_3\_V

E(B3LYP/BS1) = -619.572039 au

H(B3LYP/BS1) = -619.234426 au

G(B3LYP/BS1) = -619.303382 au

E(B3LYP/BS2//B3LYP/BS1, solvent = dichloromethane) = -860.236157 au

E(M06/BS2//B3LYP/BS1, solvent = dichloromethane) = -859.707478 au

|    |             |             |             |
|----|-------------|-------------|-------------|
| C  | -1.09138300 | -0.73800000 | -0.02620000 |
| C  | -1.28144000 | 0.74072700  | 0.01083700  |
| C  | -2.53811800 | 1.39641800  | 0.02986300  |
| C  | -2.14256600 | -1.68898500 | -0.04875100 |
| C  | -3.84197500 | 0.91132600  | 0.02041400  |
| C  | -3.52658600 | -1.54772800 | -0.04242400 |
| C  | -4.31518900 | -0.39906800 | -0.01165100 |
| H  | -2.47424700 | 2.47831000  | 0.05686500  |
| H  | -1.80885500 | -2.72011500 | -0.07515100 |
| H  | -4.60732600 | 1.68593800  | 0.04154300  |
| H  | -4.07195400 | -2.49023300 | -0.06512400 |
| H  | -5.39296600 | -0.53727700 | -0.01281900 |
| N  | -0.13114200 | 1.42513600  | 0.02541500  |
| N  | 0.19450200  | -1.11006100 | -0.03709400 |
| Al | 1.50043300  | 0.34779000  | 0.00107100  |
| C  | -0.12676000 | 2.88001900  | 0.06233600  |
| C  | 0.56436400  | -2.51772400 | -0.07519400 |
| H  | -0.62373500 | 3.31861800  | -0.81458400 |
| H  | -0.61820400 | 3.27305700  | 0.96362900  |
| H  | 0.90871600  | 3.23110300  | 0.06785900  |
| H  | 0.19281800  | -3.06741600 | 0.80125600  |
| H  | 0.18697500  | -3.02070000 | -0.97681700 |
| H  | 1.65465100  | -2.59822100 | -0.08067400 |
| C  | 2.49760200  | 0.55548300  | -1.72761400 |
| C  | 2.49397900  | 0.46535100  | 1.74049500  |
| H  | 2.98490800  | 1.45083100  | 1.80147400  |
| H  | 1.76151300  | 0.46538000  | 2.56255100  |
| H  | 2.84233600  | 1.60031700  | -1.80552600 |
| H  | 1.78730800  | 0.43401200  | -2.56009500 |
| C  | 3.55404000  | -0.62186700 | 2.01897700  |
| C  | 3.70840100  | -0.37227000 | -1.95999900 |
| H  | 4.34190300  | -0.62949900 | 1.25501700  |
| H  | 4.05294500  | -0.48685400 | 2.98971800  |
| H  | 3.11298800  | -1.62800200 | 2.03000600  |
| H  | 3.41952000  | -1.43226100 | -1.95330100 |
| H  | 4.20460400  | -0.18795200 | -2.92404200 |

H 4.47073900 -0.24790900 -1.18048600

### Ga\_3\_IV

E(B3LYP/BS1) = -579.063530 au

H(B3LYP/BS1) = -578.778626 au

G(B3LYP/BS1) = -578.838581 au

E(B3LYP/BS2//B3LYP/BS1, solvent = dichloromethane) = -2502.082058 au

E(M06/BS2//B3LYP/BS1, solvent = dichloromethane) = -2501.539231 au

|    |             |             |             |
|----|-------------|-------------|-------------|
| C  | 1.24679300  | 0.74104900  | 0.00001300  |
| C  | 1.19876000  | -0.74950200 | -0.00005300 |
| C  | 2.33628800  | -1.59628100 | -0.00015000 |
| C  | 2.43593500  | 1.51225100  | 0.00013800  |
| C  | 3.70025000  | -1.32509600 | -0.00011700 |
| C  | 3.78034800  | 1.15313000  | 0.00015100  |
| C  | 4.37631300  | -0.10612500 | 0.00002900  |
| H  | 2.10084100  | -2.65451600 | -0.00027800 |
| H  | 2.27022800  | 2.58361200  | 0.00025900  |
| H  | 4.33227400  | -2.21204300 | -0.00021600 |
| H  | 4.46800300  | 1.99767700  | 0.00027200  |
| H  | 5.46231600  | -0.14118000 | 0.00005000  |
| N  | -0.04223700 | -1.24811200 | -0.00004200 |
| N  | 0.03921000  | 1.31849700  | -0.00003200 |
| C  | -0.28145400 | -2.68306700 | -0.00004100 |
| C  | -0.10530200 | 2.76608800  | -0.00005100 |
| H  | 0.14043600  | -3.17151000 | -0.88968800 |
| H  | 0.14064600  | -3.17154000 | 0.88948900  |
| H  | -1.35968000 | -2.86125900 | 0.00008400  |
| H  | 0.34749700  | 3.22608700  | 0.88959200  |
| H  | 0.34782700  | 3.22608700  | -0.88952500 |
| H  | -1.16955000 | 3.01500200  | -0.00025200 |
| C  | -3.08528500 | 0.07622900  | -1.24681500 |
| C  | -3.08524700 | 0.07559300  | 1.24691400  |
| C  | -3.95079900 | -0.30414600 | -0.00003700 |
| H  | -3.19476200 | -0.60102000 | 2.10150000  |
| H  | -3.32707600 | 1.08652600  | 1.60371300  |
| H  | -3.19493200 | -0.59982100 | -2.10182700 |
| H  | -3.32704400 | 1.08741800  | -1.60295100 |
| H  | -4.94539600 | 0.16628200  | 0.00010200  |
| H  | -4.12233900 | -1.38969900 | -0.00031500 |
| Ga | -1.49508700 | 0.08259600  | 0.00002000  |

### Ga\_3\_V

E(B3LYP/BS1) = -619.611974 au

H(B3LYP/BS1) = -619.274601 au

G(B3LYP/BS1) = -619.344605 au

E(B3LYP/BS2//B3LYP/BS1, solvent = dichloromethane) = -2542.645200 au

E(M06/BS2//B3LYP/BS1, solvent = dichloromethane) = -2542.059980 au

|   |             |             |             |
|---|-------------|-------------|-------------|
| C | -1.30682700 | -0.76154700 | -0.05854200 |
| C | -1.46345600 | 0.72067100  | 0.02551000  |
| C | -2.70793100 | 1.40123700  | 0.06758800  |
| C | -2.38266700 | -1.68585700 | -0.10774400 |
| C | -4.02232800 | 0.94658800  | 0.04667500  |
| C | -3.76283800 | -1.51438400 | -0.09284600 |
| C | -4.52647900 | -0.35057900 | -0.02434100 |

|    |             |             |             |
|----|-------------|-------------|-------------|
| H  | -2.62111700 | 2.48013900  | 0.12754500  |
| H  | -2.07352300 | -2.72323000 | -0.16647600 |
| H  | -4.76915800 | 1.73810700  | 0.09363900  |
| H  | -4.32847200 | -2.44391300 | -0.14287900 |
| H  | -5.60709900 | -0.46437100 | -0.02660700 |
| N  | -0.30361800 | 1.38391200  | 0.05919600  |
| N  | -0.03421900 | -1.16891900 | -0.08491000 |
| C  | -0.27195800 | 2.83538100  | 0.14304200  |
| C  | 0.29821200  | -2.58246000 | -0.17136800 |
| H  | -0.76246700 | 3.31186200  | -0.71792200 |
| H  | -0.75558200 | 3.20830100  | 1.05730700  |
| H  | 0.76949800  | 3.16785400  | 0.15808900  |
| H  | -0.08358700 | -3.15162900 | 0.68844600  |
| H  | -0.09730000 | -3.04608000 | -1.08653700 |
| H  | 1.38584000  | -2.69181500 | -0.18612000 |
| C  | 2.32089100  | 0.50829300  | -1.73571200 |
| C  | 2.30308200  | 0.30133700  | 1.76516800  |
| H  | 2.83251700  | 1.26239900  | 1.85473000  |
| H  | 1.54997900  | 0.30873600  | 2.56592200  |
| H  | 2.52492500  | 1.58354100  | -1.85880300 |
| H  | 1.63880200  | 0.25088800  | -2.55847100 |
| C  | 3.30510100  | -0.84214800 | 2.02023600  |
| C  | 3.64134300  | -0.26841100 | -1.89749200 |
| H  | 4.10325500  | -0.86180100 | 1.26757900  |
| H  | 3.79254100  | -0.75787900 | 3.00210300  |
| H  | 2.81642300  | -1.82527200 | 1.99381700  |
| H  | 3.48904000  | -1.35412300 | -1.83297500 |
| H  | 4.12538400  | -0.07362700 | -2.86530700 |
| H  | 4.36610200  | -0.00315300 | -1.11760200 |
| Ga | 1.33948300  | 0.26875500  | 0.00159600  |

#### Ti\_4\_I

E(B3LYP/BS1) = -636.783028 au

H(B3LYP/BS1) = -636.630237 au

G(B3LYP/BS1) = -636.679000 au

E(B3LYP/BS2//B3LYP/BS1, solvent = dichloromethane) = -1428.390000 au

E(M06/BS2//B3LYP/BS1, solvent = dichloromethane) = -1428.085443 au

|    |             |             |             |
|----|-------------|-------------|-------------|
| C  | -0.03365200 | -1.24574900 | -1.13124500 |
| C  | 1.30367700  | -1.53251300 | -0.70119800 |
| H  | 2.15715700  | -1.70850100 | -1.34475300 |
| C  | 1.31205600  | -1.51869200 | 0.70497500  |
| H  | 2.17272500  | -1.68319300 | 1.34182000  |
| C  | -0.88510000 | -1.10261800 | 0.00966500  |
| C  | -0.02027700 | -1.22225700 | 1.14411600  |
| H  | -0.32436100 | -1.10581500 | 2.18047200  |
| Si | -2.30417000 | 0.14754600  | 0.00606300  |
| N  | -1.12135400 | 1.49553200  | -0.00831200 |
| Ti | 0.55046400  | 0.67136000  | -0.01260200 |
| H  | -1.38684000 | 2.48211000  | -0.00636600 |
| H  | -3.11624500 | 0.09889700  | -1.22693700 |
| H  | -3.10654300 | 0.11853100  | 1.24603600  |
| H  | -0.34892800 | -1.14931600 | -2.16629900 |
| C  | 2.33082100  | 1.62993100  | 0.00583700  |
| H  | 2.00593100  | 2.68825400  | -0.04060300 |



|   |            |            |             |
|---|------------|------------|-------------|
| H | 2.91393100 | 1.48219900 | 0.92654400  |
| H | 2.98567200 | 1.42392700 | -0.85226900 |

### Zr\_4\_I

E (B3LYP/BS1) = -625.293000 au

H(B3LYP/BS1) = -625.140571 au

G(B3LYP/BS1) = -625.191309 au

E(B3LYP/BS2//B3LYP/BS1, solvent = dichloromethane) = -626.034270 au

E(M06/BS2//B3LYP/BS1, solvent = dichloromethane) = -625.725859 au

|    |             |             |             |
|----|-------------|-------------|-------------|
| C  | 0.79607000  | 1.27365100  | -1.13914500 |
| C  | -0.31480100 | 2.06650000  | -0.70726000 |
| H  | -1.00455500 | 2.60812900  | -1.34547600 |
| C  | -0.31820500 | 2.06430300  | 0.70879400  |
| H  | -1.01094400 | 2.60391700  | 1.34546300  |
| C  | 1.50635900  | 0.79109600  | 0.00287000  |
| C  | 0.79017400  | 1.26944600  | 1.14328900  |
| H  | 1.04730800  | 1.06921300  | 2.17928900  |
| Si | 2.28788900  | -0.92385400 | 0.00181900  |
| N  | 0.67446700  | -1.69992100 | -0.00189800 |
| H  | 0.54530300  | -2.71441000 | -0.00232200 |
| H  | 3.04921700  | -1.22008800 | -1.23013500 |
| H  | 3.04520500  | -1.22393800 | 1.23531800  |
| H  | 1.05799000  | 1.07677000  | -2.17457300 |
| C  | -2.85879100 | -1.01838100 | 0.00344100  |
| H  | -2.90267600 | -2.12139400 | -0.00738400 |
| H  | -3.42207900 | -0.68947500 | 0.89420600  |
| H  | -3.43580300 | -0.67127900 | -0.87135200 |
| Zr | -0.78313800 | -0.31409300 | -0.00267800 |

### Hf\_4\_I

E (B3LYP/BS1) = -627.631878 au

H(B3LYP/BS1) = -627.479015 au

G(B3LYP/BS1) = -627.527390 au

E(B3LYP/BS2//B3LYP/BS1, solvent = dichloromethane) = -627.010824 au

E(M06/BS2//B3LYP/BS1, solvent = dichloromethane) = -626.718611 au

|    |             |             |             |
|----|-------------|-------------|-------------|
| C  | 0.90286300  | 1.66523000  | -0.78966600 |
| C  | -0.37979400 | 2.22578300  | -0.52413700 |
| H  | -0.97695800 | 2.81156800  | -1.21477000 |
| C  | -0.70942500 | 1.94016300  | 0.82776500  |
| H  | -1.60727900 | 2.25030400  | 1.34806500  |
| C  | 1.38175500  | 1.00380500  | 0.38026100  |
| C  | 0.35531400  | 1.17505500  | 1.37798900  |
| H  | 0.39003900  | 0.78711000  | 2.39003200  |
| Si | 2.44796300  | -0.55541100 | 0.31424600  |
| N  | 1.03774900  | -1.53781300 | -0.16723200 |
| H  | 1.05256900  | -2.55807900 | -0.13922500 |
| H  | 3.49395600  | -0.48151900 | -0.72802900 |
| H  | 2.98180500  | -0.94962100 | 1.63552100  |
| H  | 1.41736800  | 1.69938300  | -1.74533500 |
| C  | -2.09874900 | -1.10357300 | 0.96791200  |
| H  | -2.33136500 | -2.11525700 | 0.58070600  |
| H  | -1.85843400 | -1.23344200 | 2.03086500  |
| H  | -3.03077300 | -0.51760700 | 0.92377500  |
| Hf | -0.52470100 | -0.31376600 | -0.30210000 |

### Ti\_4\_II

E(B3LYP/BS1) = -715.408512 au

H(B3LYP/BS1) = -715.197656 au

G(B3LYP/BS1) = -715.251513 au

E(B3LYP/BS2//B3LYP/BS1, solvent = dichloromethane) = -1507.023422 au

E(M06/BS2//B3LYP/BS1, solvent = dichloromethane) = -1506.651120 au

|    |             |             |             |
|----|-------------|-------------|-------------|
| C  | 0.53532500  | 1.09911100  | -1.37694200 |
| C  | -0.48854200 | 1.90812700  | -0.79740500 |
| H  | -1.33928100 | 2.33041900  | -1.31797300 |
| C  | -0.15047900 | 2.12489000  | 0.56681800  |
| H  | -0.72086000 | 2.69945100  | 1.28529800  |
| C  | 1.50255900  | 0.78674700  | -0.38245800 |
| C  | 1.05525300  | 1.43089400  | 0.82780200  |
| H  | 1.54633100  | 1.36952200  | 1.79103400  |
| Si | 2.37761400  | -0.88140600 | -0.36082100 |
| N  | 0.85974500  | -1.63702200 | 0.16051900  |
| Ti | -0.43386200 | -0.27689500 | 0.28365200  |
| H  | 0.78960400  | -2.55458400 | 0.60333800  |
| H  | 2.83185500  | -1.31565200 | -1.69961900 |
| H  | 3.44123700  | -0.98480800 | 0.66178000  |
| H  | 0.54525900  | 0.73128800  | -2.39756200 |
| C  | -1.11518300 | -0.28292500 | 2.21411400  |
| H  | -1.39859900 | -1.33472800 | 2.38387500  |
| H  | -0.46190300 | 0.03798700  | 3.02925400  |
| H  | -2.02638300 | 0.34134900  | 2.24105700  |
| C  | -2.67974400 | -0.24544700 | -1.21065400 |
| H  | -3.28210000 | 0.49503700  | -0.67416100 |
| H  | -2.36666600 | 0.03925900  | -2.22118000 |
| C  | -2.42313100 | -1.47964800 | -0.68400800 |
| H  | -2.82767600 | -1.75082800 | 0.29425100  |
| H  | -1.90700600 | -2.26367600 | -1.23547400 |

### Zr\_4\_II

E(B3LYP/BS1) = -703.924721 au

H(B3LYP/BS1) = -703.714420 au

G(B3LYP/BS1) = -703.772278 au

E(B3LYP/BS2//B3LYP/BS1, solvent = dichloromethane) = -704.657011 au

E(M06/BS2//B3LYP/BS1, solvent = dichloromethane) = -704.280477 au

|    |             |             |             |
|----|-------------|-------------|-------------|
| C  | 0.69363500  | 1.14489000  | -1.43777000 |
| C  | -0.19799600 | 2.07016100  | -0.82234900 |
| H  | -1.00441300 | 2.60412300  | -1.31090100 |
| C  | 0.21797800  | 2.24283800  | 0.52544800  |
| H  | -0.23621100 | 2.90070000  | 1.25599000  |
| C  | 1.65834300  | 0.71360100  | -0.48141100 |
| C  | 1.34523000  | 1.41273500  | 0.73862500  |
| H  | 1.87803900  | 1.30828600  | 1.67670800  |
| Si | 2.41931800  | -1.01442700 | -0.49675600 |
| N  | 0.91092300  | -1.73530500 | 0.09020300  |
| H  | 0.85405600  | -2.68205700 | 0.46711600  |
| H  | 2.79776200  | -1.44826400 | -1.86100900 |
| H  | 3.53980200  | -1.15789600 | 0.45996000  |
| H  | 0.63017300  | 0.79563900  | -2.46319000 |
| C  | -1.01029000 | -0.16122000 | 2.44067600  |

|    |             |             |             |
|----|-------------|-------------|-------------|
| H  | -1.46887700 | -1.15300900 | 2.62669600  |
| H  | -0.23231000 | -0.02249600 | 3.19936700  |
| H  | -1.78362000 | 0.60314200  | 2.62157300  |
| C  | -2.75435400 | -0.02775300 | -1.44945400 |
| H  | -3.32792100 | 0.77319000  | -0.98609000 |
| H  | -2.33052800 | 0.17934800  | -2.42908500 |
| C  | -2.65188100 | -1.24661300 | -0.87723600 |
| H  | -3.17709200 | -1.48027200 | 0.05061200  |
| H  | -2.16525200 | -2.07576100 | -1.39072500 |
| Zr | -0.45061300 | -0.24218500 | 0.31467400  |

#### Hf 4 II

E(B3LYP/BS1) = -706.263444 au

H(B3LYP/BS1) = -706.053120 au

G(B3LYP/BS1) = -706.111428 au

E(B3LYP/BS2//B3LYP/BS1, solvent = dichloromethane) = -705.615165 au

E(M06/BS2//B3LYP/BS1, solvent = dichloromethane) = -705.251056 au

|    |             |             |             |
|----|-------------|-------------|-------------|
| C  | 0.91087400  | 1.30756800  | -1.35121500 |
| C  | 0.00061600  | 2.19973800  | -0.71088700 |
| H  | -0.75409700 | 2.80435000  | -1.19969500 |
| C  | 0.32136400  | 2.23062400  | 0.67188700  |
| H  | -0.16285700 | 2.83525700  | 1.42877100  |
| C  | 1.79616900  | 0.75878300  | -0.38004700 |
| C  | 1.40879700  | 1.34308400  | 0.87959800  |
| H  | 1.87403600  | 1.13501000  | 1.83719500  |
| Si | 2.48485500  | -0.99693400 | -0.48552800 |
| N  | 0.91807300  | -1.70446700 | -0.02407600 |
| H  | 0.83552800  | -2.67583800 | 0.27581300  |
| H  | 2.91276800  | -1.34958800 | -1.85805200 |
| H  | 3.54366900  | -1.26161700 | 0.51392000  |
| H  | 0.90870400  | 1.05863400  | -2.40754100 |
| C  | -1.29119800 | -0.34217500 | 2.19731000  |
| H  | -1.74203200 | -1.34789100 | 2.28951800  |
| H  | -0.61178600 | -0.23537700 | 3.05380300  |
| H  | -2.10315600 | 0.38702600  | 2.35419700  |
| C  | -2.44951800 | 0.21673700  | -1.63912800 |
| H  | -3.06642800 | 0.91607300  | -1.07631200 |
| H  | -1.99377200 | 0.59222300  | -2.55141800 |
| C  | -2.33748900 | -1.08085300 | -1.27477300 |
| H  | -2.89635600 | -1.47707000 | -0.42449800 |
| H  | -1.80580500 | -1.80160200 | -1.89432300 |
| Hf | -0.36542500 | -0.18739300 | 0.22594500  |

#### TS<sub>Ti-4</sub>

E(B3LYP/BS1) = -715.397533 au

H(B3LYP/BS1) = -715.185072 au

G(B3LYP/BS1) = -715.236433 au

E(B3LYP/BS2//B3LYP/BS1, solvent = dichloromethane) = -1507.010210 au

E(M06/BS2//B3LYP/BS1, solvent = dichloromethane) = -1506.642716 au

|   |             |            |             |
|---|-------------|------------|-------------|
| C | -0.94316000 | 1.10447900 | 1.23896400  |
| C | -0.01596600 | 2.06923900 | 0.75888600  |
| H | 0.68338000  | 2.63606100 | 1.36143100  |
| C | -0.16118000 | 2.15710600 | -0.64446500 |
| H | 0.39551000  | 2.81016200 | -1.30613400 |

|    |             |             |             |
|----|-------------|-------------|-------------|
| C  | -1.69531800 | 0.59078700  | 0.13614600  |
| C  | -1.18645600 | 1.24677000  | -1.02916800 |
| H  | -1.51332900 | 1.06243800  | -2.04722200 |
| Si | -2.25064100 | -1.20452100 | 0.05896600  |
| N  | -0.56207000 | -1.69179000 | -0.20022800 |
| Ti | 0.48076300  | -0.13051900 | -0.19969500 |
| H  | -0.23005800 | -2.65145300 | -0.30165000 |
| H  | -2.80473200 | -1.70893200 | 1.33478500  |
| H  | -3.12493600 | -1.50731100 | -1.09560400 |
| H  | -1.04540700 | 0.79280600  | 2.27193700  |
| C  | 2.10184100  | -0.31917000 | -1.52231100 |
| H  | 2.66680700  | -1.15606900 | -1.93219300 |
| H  | 1.13076200  | -0.30182200 | -2.11051700 |
| H  | 2.62787100  | 0.61864200  | -1.72113900 |
| C  | 1.84634800  | -0.43294000 | 1.51686700  |
| H  | 1.99703400  | 0.50415400  | 2.04499200  |
| H  | 1.33908100  | -1.21862000 | 2.07390700  |
| C  | 2.76091400  | -0.79859100 | 0.51711700  |
| H  | 3.61060100  | -0.16112600 | 0.29424700  |
| H  | 2.89195300  | -1.84776800 | 0.27030000  |

### TS<sub>Zr-4</sub>

E(B3LYP/BS1) = -703.910000 au

H(B3LYP/BS1) = -703.700007 au

G(B3LYP/BS1) = -703.752828 au

E(B3LYP/BS2//B3LYP/BS1, solvent = dichloromethane) = -704.638643 au

E(M06/BS2//B3LYP/BS1, solvent = dichloromethane) = -704.266345 au

|    |             |             |             |
|----|-------------|-------------|-------------|
| C  | -1.18785000 | 1.12010800  | 1.22388200  |
| C  | -0.39005500 | 2.16279800  | 0.67780100  |
| H  | 0.24085900  | 2.84471100  | 1.23580000  |
| C  | -0.59475800 | 2.18146200  | -0.72498000 |
| H  | -0.16366700 | 2.88976900  | -1.42383300 |
| C  | -1.91162400 | 0.48163000  | 0.16651600  |
| C  | -1.52674600 | 1.14777300  | -1.03874900 |
| H  | -1.88279100 | 0.90375100  | -2.03469700 |
| Si | -2.31842600 | -1.35771300 | 0.18558200  |
| N  | -0.62322800 | -1.78212600 | -0.11892300 |
| H  | -0.29600800 | -2.74385100 | -0.21363400 |
| H  | -2.80720300 | -1.82739900 | 1.50180600  |
| H  | -3.22362300 | -1.76241100 | -0.91421100 |
| H  | -1.23578300 | 0.85011400  | 2.27271500  |
| C  | 2.35583500  | -0.44982000 | -1.42115900 |
| H  | 3.41373700  | -0.46047900 | -1.67490500 |
| H  | 1.91822700  | -1.40594700 | -1.77099500 |
| H  | 1.91436900  | 0.39411600  | -2.01368900 |
| C  | 1.88580200  | -0.18234800 | 1.65213000  |
| H  | 1.83060300  | 0.78227300  | 2.15095500  |
| H  | 1.48556100  | -1.02821100 | 2.21047300  |
| C  | 2.94006900  | -0.40785700 | 0.75413000  |
| H  | 3.63960300  | 0.39106400  | 0.52893000  |
| H  | 3.32248200  | -1.41175100 | 0.59462600  |
| Zr | 0.48100400  | -0.08138400 | -0.24881100 |

### TS<sub>Hf-4</sub>

E(B3LYP/BS1) = -706.246000 au

H(B3LYP/BS1) = -706.036424 au  
 G(B3LYP/BS1) = -706.090000 au  
 E(B3LYP/BS2//B3LYP/BS1, solvent = dichloromethane) = -705.592000 au  
 E(M06/BS2//B3LYP/BS1, solvent = dichloromethane) = -705.233279 au

|    |             |             |             |
|----|-------------|-------------|-------------|
| C  | -1.22294200 | 1.22098300  | 1.22753900  |
| C  | -0.33975900 | 2.20161900  | 0.69767000  |
| H  | 0.31335300  | 2.84935200  | 1.27048300  |
| C  | -0.49039900 | 2.21134300  | -0.71223700 |
| H  | 0.01313900  | 2.87777900  | -1.40321600 |
| C  | -1.94942000 | 0.61201300  | 0.15180700  |
| C  | -1.47333400 | 1.23360400  | -1.04763800 |
| H  | -1.80921200 | 0.99795500  | -2.05262200 |
| Si | -2.48027500 | -1.19929400 | 0.17890600  |
| N  | -0.80710000 | -1.75598200 | -0.05265300 |
| H  | -0.57723800 | -2.74657900 | -0.11854300 |
| H  | -3.05595700 | -1.60655400 | 1.48046100  |
| H  | -3.37013000 | -1.54922500 | -0.95159500 |
| H  | -1.32834600 | 0.97263800  | 2.27775000  |
| C  | 2.15452900  | -0.42371800 | -1.40202700 |
| H  | 3.14686100  | -0.15991700 | -1.76403800 |
| H  | 1.97245600  | -1.48535600 | -1.64224900 |
| H  | 1.45605600  | 0.20380900  | -2.03515400 |
| C  | 1.80950800  | -0.27077700 | 1.65834900  |
| H  | 1.71693000  | 0.63278300  | 2.25692400  |
| H  | 1.54833200  | -1.19774600 | 2.17021900  |
| C  | 2.84389600  | -0.31709900 | 0.69867500  |
| H  | 3.43209200  | 0.57344500  | 0.49876100  |
| H  | 3.34527500  | -1.25372000 | 0.47308300  |
| Hf | 0.35524300  | -0.12270100 | -0.14207200 |

### Ti\_4\_III

E(B3LYP/BS1) = -715.412000 au  
 H(B3LYP/BS1) = -715.198745 au  
 G(B3LYP/BS1) = -715.254000 au  
 E(B3LYP/BS2//B3LYP/BS1, solvent = dichloromethane) = -1507.040000 au  
 E(M06/BS2//B3LYP/BS1, solvent = dichloromethane) = -1506.664862 au

|    |             |             |             |
|----|-------------|-------------|-------------|
| C  | 1.21218900  | 1.22133100  | -1.10586100 |
| C  | 0.08400700  | 1.98492400  | -0.66610900 |
| H  | -0.63844400 | 2.48219300  | -1.30158300 |
| C  | 0.07486000  | 1.95685400  | 0.74103400  |
| H  | -0.65858200 | 2.42613400  | 1.38566800  |
| C  | 1.94606500  | 0.74634700  | 0.02989100  |
| C  | 1.19554200  | 1.17544100  | 1.17093100  |
| H  | 1.43500100  | 0.94321300  | 2.20442500  |
| Si | 2.79756400  | -0.94340800 | -0.00853800 |
| N  | 1.20850500  | -1.76672900 | -0.05187900 |
| Ti | -0.02420200 | -0.35863600 | -0.02114400 |
| H  | 1.10891600  | -2.78169700 | -0.08967500 |
| H  | 3.58337800  | -1.16020700 | -1.24157600 |
| H  | 3.55730000  | -1.23398800 | 1.22549600  |
| H  | 1.46883900  | 1.02584300  | -2.14321600 |
| C  | -1.99416000 | -0.60324300 | 0.10174600  |
| H  | -1.94054200 | -1.68484100 | -0.17506300 |

|   |             |             |             |
|---|-------------|-------------|-------------|
| C | -3.28504900 | 0.04633000  | -0.36679600 |
| C | -4.55149000 | -0.64102000 | 0.17330400  |
| H | -1.88849300 | -0.56958700 | 1.22251000  |
| H | -5.44587300 | -0.13219600 | -0.20018300 |
| H | -4.60181000 | -1.68816400 | -0.14469600 |
| H | -4.58042500 | -0.61539600 | 1.26829300  |
| H | -3.28032100 | 1.10125100  | -0.06702700 |
| H | -3.30370500 | 0.03047100  | -1.46434600 |

### Zr\_4\_III

E(B3LYP/BS1) = -704.564123 au

H(B3LYP/BS1) = -704.353059 au

G(B3LYP/BS1) = -704.409008 au

E(B3LYP/BS2//B3LYP/BS1, solvent = dichloromethane) = -704.673001 au

E(M06/BS2//B3LYP/BS1, solvent = dichloromethane) = -704.299057 au

|    |             |             |             |
|----|-------------|-------------|-------------|
| C  | 1.86607000  | 1.25519900  | -0.85582600 |
| C  | 0.84483800  | 2.20608600  | -0.56280500 |
| H  | 0.43438500  | 2.93396800  | -1.24887500 |
| C  | 0.49991700  | 2.06367800  | 0.79468900  |
| H  | -0.21931300 | 2.66201100  | 1.33536500  |
| C  | 2.17456100  | 0.51546600  | 0.32078300  |
| C  | 1.29780000  | 1.01230400  | 1.33525800  |
| H  | 1.25840300  | 0.66221200  | 2.35873700  |
| Si | 2.66042100  | -1.30475400 | 0.25232500  |
| N  | 1.01914700  | -1.81664700 | -0.18213700 |
| H  | 0.77015700  | -2.80055300 | -0.23668600 |
| H  | 3.64350800  | -1.58508600 | -0.80926500 |
| H  | 3.07677500  | -1.83214800 | 1.56414200  |
| H  | 2.33044700  | 1.11658100  | -1.82404400 |
| C  | -2.25156500 | -0.34612600 | -0.08958900 |
| H  | -2.18765600 | -1.46213900 | -0.12181700 |
| C  | -3.66965500 | 0.12314300  | -0.35515900 |
| C  | -4.73152700 | -0.48348800 | 0.56966200  |
| H  | -1.95072500 | -0.10422700 | 0.98603000  |
| H  | -5.72415300 | -0.11156300 | 0.31044100  |
| H  | -4.75053700 | -1.57282300 | 0.48939200  |
| H  | -4.54094400 | -0.22575700 | 1.61425500  |
| H  | -3.69958100 | 1.21412200  | -0.28807900 |
| H  | -3.90927900 | -0.12333300 | -1.39455500 |
| Zr | -0.12735100 | -0.14664400 | -0.29836800 |

### Hf\_4\_III

E(B3LYP/BS1) = -706.263000 au

H(B3LYP/BS1) = -706.050646 au

G(B3LYP/BS1) = -706.106000 au

E(B3LYP/BS2//B3LYP/BS1, solvent = dichloromethane) = -705.641000 au

E(M06/BS2//B3LYP/BS1, solvent = dichloromethane) = -705.284803 au

|   |             |            |             |
|---|-------------|------------|-------------|
| C | 1.69489700  | 1.24480100 | -0.96263800 |
| C | 0.71396200  | 2.22407700 | -0.63367700 |
| H | 0.27241600  | 2.94206600 | -1.31584900 |
| C | 0.46805300  | 2.13826100 | 0.76259800  |
| H | -0.21014800 | 2.76251000 | 1.33123200  |
| C | 2.06562900  | 0.52956600 | 0.21987100  |
| C | 1.27945100  | 1.09578800 | 1.28468400  |

|    |             |             |             |
|----|-------------|-------------|-------------|
| H  | 1.29630500  | 0.77454300  | 2.32004100  |
| Si | 2.55441600  | -1.29603700 | 0.18791900  |
| N  | 0.87037900  | -1.79641400 | -0.10752600 |
| H  | 0.58543500  | -2.77341900 | -0.04804600 |
| H  | 3.46985700  | -1.61138600 | -0.93115300 |
| H  | 3.07114400  | -1.77595300 | 1.48843500  |
| H  | 2.08350600  | 1.05257700  | -1.95825800 |
| C  | -1.86637400 | -0.23240300 | 1.17755300  |
| H  | -2.04651700 | -1.28964300 | 1.42561200  |
| C  | -2.79724900 | 0.22574000  | 0.02833800  |
| C  | -4.05549300 | -0.62094500 | -0.20109500 |
| H  | -2.00272100 | 0.36466000  | 2.07922000  |
| H  | -4.63453400 | -0.25752500 | -1.05576400 |
| H  | -3.80293900 | -1.67266200 | -0.37324600 |
| H  | -4.68867800 | -0.56868600 | 0.68966100  |
| H  | -3.04814100 | 1.28582900  | 0.13930700  |
| H  | -2.25942500 | 0.21795200  | -0.99365400 |
| Hf | -0.20774000 | -0.11612200 | -0.20457700 |

#### **Ti\_4\_IV**

E(B3LYP/BS1) = -715.037351 au

H(B3LYP/BS1) = -714.837397 au

G(B3LYP/BS1) = -714.888289 au

E(B3LYP/BS2//B3LYP/BS1, solvent = dichloromethane) = -1506.589377 au

E(M06/BS2//B3LYP/BS1, solvent = dichloromethane) = -1506.226546 au

|    |             |             |             |
|----|-------------|-------------|-------------|
| C  | -0.89904300 | 1.27895000  | 1.14326700  |
| C  | 0.21831900  | 2.02931700  | 0.70949700  |
| H  | 0.95007400  | 2.50976700  | 1.34667400  |
| C  | 0.21706100  | 2.02930400  | -0.71068400 |
| H  | 0.94746900  | 2.50998900  | -1.34921500 |
| C  | -1.61448600 | 0.79547300  | 0.00118300  |
| C  | -0.90112800 | 1.27891600  | -1.14229500 |
| H  | -1.13498700 | 1.04028600  | -2.17326200 |
| Si | -2.41811600 | -0.89954300 | 0.00087900  |
| N  | -0.88446000 | -1.72282800 | -0.00235900 |
| Ti | 0.43938600  | -0.31476600 | -0.00120700 |
| H  | -0.74479400 | -2.72879600 | -0.00257600 |
| H  | -3.26145100 | -1.13596700 | 1.20877400  |
| H  | -3.26543900 | -1.13367800 | -1.20466800 |
| H  | -1.13071900 | 1.04008900  | 2.17466500  |
| C  | 1.96175800  | -0.62187700 | 1.31557600  |
| C  | 1.96473600  | -0.62132000 | -1.31436200 |
| C  | 2.83247800  | -0.55683700 | 0.00160700  |
| H  | 2.31243700  | 0.04888100  | 2.09853300  |
| H  | 1.88449500  | -1.64695800 | 1.70163400  |
| H  | 3.38671600  | 0.38519000  | 0.00225800  |
| H  | 3.55086600  | -1.38396200 | 0.00217500  |
| H  | 2.31820200  | 0.04845100  | -2.09691200 |
| H  | 1.88730500  | -1.64659500 | -1.70006700 |

#### **Ti\_4\_V**

E(B3LYP/BS1) = -755.560340 au

H(B3LYP/BS1) = -755.308461 au

G(B3LYP/BS1) = -755.367536 au

E(B3LYP/BS2//B3LYP/BS1, solvent = dichloromethane) = -1547.127385 au

E(M06/BS2//B3LYP/BS1, solvent = dichloromethane) = -1546.723553 au

|    |             |             |             |
|----|-------------|-------------|-------------|
| C  | -1.66145800 | -1.16221500 | -0.82299900 |
| C  | -1.04545500 | -2.18073800 | -0.06100800 |
| H  | -0.65581400 | -3.11630300 | -0.44203600 |
| C  | -1.01356000 | -1.75028800 | 1.29223900  |
| H  | -0.59499300 | -2.29986300 | 2.12612900  |
| C  | -2.02077400 | -0.07775200 | 0.03866700  |
| C  | -1.61177000 | -0.47037000 | 1.35248300  |
| H  | -1.67428400 | 0.15079300  | 2.23832900  |
| Si | -1.88426800 | 1.70143900  | -0.53673400 |
| N  | -0.14397000 | 1.64186300  | -0.55417300 |
| Ti | 0.33416700  | -0.13672000 | 0.01551100  |
| H  | 0.48956900  | 2.40077600  | -0.79014300 |
| H  | -2.52255400 | 1.92834300  | -1.86531000 |
| H  | -2.47151500 | 2.67180600  | 0.43159900  |
| H  | -1.77084200 | -1.16585500 | -1.90116800 |
| C  | 1.50953900  | -1.02867200 | -1.48315600 |
| C  | 1.60620100  | -0.01013900 | 1.67847100  |
| H  | 1.80326700  | -2.03127000 | -1.13376300 |
| H  | 0.90653600  | -1.17538500 | -2.38942000 |
| H  | 2.24769800  | -0.90030600 | 1.53485400  |
| H  | 1.11088200  | -0.13666800 | 2.64761500  |
| C  | 2.75709400  | -0.18737100 | -1.80218100 |
| C  | 2.45614200  | 1.27225900  | 1.67847900  |
| H  | 3.41675800  | -0.08001700 | -0.93238500 |
| H  | 3.36058900  | -0.64327600 | -2.60088900 |
| H  | 2.49296300  | 0.82260700  | -2.14233800 |
| H  | 2.91986600  | 1.47518200  | 0.70381700  |
| H  | 1.84455900  | 2.14539600  | 1.93297500  |
| H  | 3.27742800  | 1.22039800  | 2.40839200  |

#### Zr\_4\_IV

E(B3LYP/BS1) = -703.540062 au

H(B3LYP/BS1) = -703.341132 au

G(B3LYP/BS1) = -703.393813 au

E(B3LYP/BS2//B3LYP/BS1, solvent = dichloromethane) = -704.202310 au

E(M06/BS2//B3LYP/BS1, solvent = dichloromethane) = -703.835338 au

|    |             |             |             |
|----|-------------|-------------|-------------|
| C  | -1.18765400 | 1.29427100  | 1.14312900  |
| C  | -0.15765600 | 2.16458900  | 0.71161600  |
| H  | 0.49758900  | 2.74466900  | 1.34983000  |
| C  | -0.15816300 | 2.16460700  | -0.71195200 |
| H  | 0.49655800  | 2.74476000  | -1.35063700 |
| C  | -1.84219700 | 0.72867800  | 0.00046900  |
| C  | -1.18852600 | 1.29432900  | -1.14268500 |
| H  | -1.40991600 | 1.04861500  | -2.17552400 |
| Si | -2.53465200 | -1.02048500 | 0.00054800  |
| N  | -0.97876600 | -1.81128600 | -0.00057800 |
| H  | -0.86221300 | -2.82095200 | -0.00097900 |
| H  | -3.37164100 | -1.28714400 | 1.20697500  |
| H  | -3.37312500 | -1.28672400 | -1.20494600 |
| H  | -1.40819000 | 1.04847100  | 2.17612700  |
| C  | 2.18127700  | -0.45543000 | 1.33872400  |
| C  | 2.18298600  | -0.45512700 | -1.33782900 |
| C  | 3.01825100  | -0.28101900 | 0.00103600  |



|    |            |             |             |
|----|------------|-------------|-------------|
| H  | 2.51939900 | 0.22352300  | 2.12240300  |
| H  | 2.25226500 | -1.48891700 | 1.71207100  |
| H  | 3.44418400 | 0.72697100  | 0.00141000  |
| H  | 3.84817900 | -0.99689100 | 0.00147700  |
| H  | 2.52229400 | 0.22392700  | -2.12091100 |
| H  | 2.25450000 | -1.48855500 | -1.71126900 |
| Zr | 0.44591800 | -0.27888300 | -0.0006     |

#### Zr\_4\_V

E(B3LYP/BS1) = -744.069916 au

H(B3LYP/BS1) = -743.819094 au

G(B3LYP/BS1) = -743.881708 au

E(B3LYP/BS2//B3LYP/BS1, solvent = dichloromethane) = -744.746901 au

E(M06/BS2//B3LYP/BS1, solvent = dichloromethane) = -744.338983 au

|    |             |             |             |
|----|-------------|-------------|-------------|
| C  | -1.78003800 | -1.26422200 | -0.68991200 |
| C  | -1.18706700 | -2.19996400 | 0.19028100  |
| H  | -0.82241700 | -3.18472000 | -0.07541500 |
| C  | -1.17346700 | -1.62343100 | 1.49183200  |
| H  | -0.79725200 | -2.09167200 | 2.39324700  |
| C  | -2.13650200 | -0.08455800 | 0.04098800  |
| C  | -1.75801900 | -0.33787600 | 1.39983400  |
| H  | -1.84866500 | 0.36960300  | 2.21650800  |
| Si | -2.07346100 | 1.63359800  | -0.72093500 |
| N  | -0.33303300 | 1.71104800  | -0.76136100 |
| H  | 0.19490500  | 2.50833900  | -1.10689200 |
| H  | -2.73928600 | 1.67351000  | -2.05577800 |
| H  | -2.72919100 | 2.65483900  | 0.14732200  |
| H  | -1.89003700 | -1.39355700 | -1.76072400 |
| C  | 1.58942700  | -1.23013600 | -1.49055300 |
| C  | 1.67786500  | 0.22904000  | 1.83375900  |
| H  | 1.96415800  | -2.15573400 | -1.01966700 |
| H  | 0.99522500  | -1.55472700 | -2.35654000 |
| H  | 2.31305100  | -0.67653500 | 1.88509100  |
| H  | 1.16199700  | 0.28545900  | 2.80091200  |
| C  | 2.77995900  | -0.37049300 | -1.96686400 |
| C  | 2.56642900  | 1.47588200  | 1.63849600  |
| H  | 3.41581700  | -0.03687200 | -1.13411800 |
| H  | 3.44139600  | -0.91483800 | -2.65709100 |
| H  | 2.44428200  | 0.52989100  | -2.49948100 |
| H  | 3.04925700  | 1.50429800  | 0.64908000  |
| H  | 1.98025100  | 2.39818100  | 1.73295800  |
| H  | 3.38270700  | 1.53370300  | 2.37357700  |
| Zr | 0.35929900  | -0.09655800 | 0.03006200  |

#### Hf\_4\_IV

E(B3LYP/BS1) = -705.885459 au

H(B3LYP/BS1) = -705.686253 au

G(B3LYP/BS1) = -705.739506 au

E(B3LYP/BS2//B3LYP/BS1, solvent = dichloromethane) = -705.167020 au

E(M06/BS2//B3LYP/BS1, solvent = dichloromethane) = -704.811782 au

|   |             |            |             |
|---|-------------|------------|-------------|
| C | -1.33044900 | 1.30088100 | 1.14280500  |
| C | -0.33489600 | 2.21153900 | 0.71153200  |
| H | 0.29689200  | 2.81706300 | 1.34983900  |
| C | -0.33475500 | 2.21149400 | -0.71169800 |

|    |             |             |             |
|----|-------------|-------------|-------------|
| H  | 0.29716000  | 2.81697700  | -1.34991900 |
| C  | -1.96397100 | 0.71268100  | -0.00019300 |
| C  | -1.33025700 | 1.30085100  | -1.14310100 |
| H  | -1.54185400 | 1.04732900  | -2.17611400 |
| Si | -2.56126000 | -1.07041500 | -0.00026700 |
| N  | -0.95736700 | -1.76805600 | -0.00008600 |
| H  | -0.78733300 | -2.76973700 | -0.00012200 |
| H  | -3.37834600 | -1.38901000 | 1.20616400  |
| H  | -3.37805500 | -1.38897700 | -1.20690500 |
| H  | -1.54222800 | 1.04740200  | 2.17579200  |
| C  | 2.07682900  | -0.38374300 | 1.32723100  |
| C  | 2.07696900  | -0.38374400 | -1.32689300 |
| C  | 2.91726800  | -0.15576300 | 0.00021000  |
| H  | 2.38198800  | 0.29550300  | 2.12562800  |
| H  | 2.20487300  | -1.41529900 | 1.68738500  |
| H  | 3.29053200  | 0.87380900  | 0.00022600  |
| H  | 3.78546000  | -0.82409500 | 0.00026300  |
| H  | 2.38226800  | 0.29541600  | -2.12530600 |
| H  | 2.20496400  | -1.41534200 | -1.68695900 |
| Hf | 0.35670100  | -0.18769500 | 0.00007000  |

#### Hf\_4\_V

E(B3LYP/BS1) = -746.414015 au

H(B3LYP/BS1) = -746.162964 au

G(B3LYP/BS1) = -746.226119 au

E(B3LYP/BS2//B3LYP/BS1, solvent = dichloromethane) = -745.712805 au

E(M06/BS2//B3LYP/BS1, solvent = dichloromethane) = -745.316102 au

|    |             |             |             |
|----|-------------|-------------|-------------|
| C  | -1.88050200 | -1.20617900 | -0.71957700 |
| C  | -1.30709700 | -2.16156900 | 0.15362100  |
| H  | -0.96050900 | -3.15068800 | -0.11996500 |
| C  | -1.28824500 | -1.59829700 | 1.46085200  |
| H  | -0.92620300 | -2.08322000 | 2.35935600  |
| C  | -2.22188100 | -0.02881300 | 0.02211200  |
| C  | -1.85087400 | -0.30112000 | 1.37929700  |
| H  | -1.93374800 | 0.39929500  | 2.20306400  |
| Si | -2.09265800 | 1.69267500  | -0.72224200 |
| N  | -0.34459600 | 1.70646800  | -0.74333100 |
| H  | 0.20707200  | 2.49045500  | -1.08126500 |
| H  | -2.73432100 | 1.77203900  | -2.06602500 |
| H  | -2.71275400 | 2.73227200  | 0.14867600  |
| H  | -1.98851600 | -1.32268300 | -1.79218700 |
| C  | 1.52756300  | -1.15754500 | -1.48159400 |
| C  | 1.63421600  | 0.24839900  | 1.76075000  |
| H  | 1.81359400  | -2.14702800 | -1.08271900 |
| H  | 0.93908300  | -1.37552100 | -2.38711700 |
| H  | 2.26217500  | -0.66236200 | 1.82059100  |
| H  | 1.11831200  | 0.30052900  | 2.73059200  |
| C  | 2.80643800  | -0.38650800 | -1.88192500 |
| C  | 2.54930000  | 1.48464400  | 1.60539900  |
| H  | 3.46418100  | -0.20544100 | -1.02158100 |
| H  | 3.40654600  | -0.92907000 | -2.62666100 |
| H  | 2.57316000  | 0.59320300  | -2.32147900 |
| H  | 3.07520300  | 1.49899600  | 0.64003300  |
| H  | 1.97078300  | 2.41465300  | 1.66749800  |
| H  | 3.32609100  | 1.53447900  | 2.38192900  |

Hf 0.26382900 -0.09528800 0.02872700

### Ti\_5\_I

E(B3LYP/BS1) = -657.903159 au

H(B3LYP/BS1) = -657.740961 au

G(B3LYP/BS1) = -657.794351 au

E(B3LYP/BS2//B3LYP/BS1, solvent = dichloromethane) = -1449.523643 au

E(M06/BS2//B3LYP/BS1, solvent = dichloromethane) = -1449.210060 au

|    |             |             |             |
|----|-------------|-------------|-------------|
| C  | 1.95579300  | -1.06249000 | -0.93470200 |
| H  | 2.13862100  | -1.36863300 | -1.95956300 |
| C  | 1.07971600  | -1.70692500 | -0.02005400 |
| H  | 0.46751700  | -2.57687700 | -0.22352800 |
| C  | 1.10596700  | -0.96835200 | 1.19342100  |
| H  | 0.54214900  | -1.19744000 | 2.09028900  |
| C  | 2.56288600  | 0.04104700  | -0.27347000 |
| H  | 3.26961100  | 0.73502700  | -0.71231100 |
| C  | 2.03752400  | 0.11065300  | 1.03704200  |
| H  | 2.29258300  | 0.84420900  | 1.79029700  |
| Ti | 0.15978900  | 0.38229600  | -0.37126300 |
| C  | 0.37113800  | 2.35747800  | 0.09196800  |
| O  | -1.55310200 | 0.08611400  | -0.19006000 |
| Si | -3.19301500 | -0.35384700 | 0.09112000  |
| H  | 1.36660800  | 2.80272300  | 0.03885800  |
| H  | -0.27799900 | 2.77153300  | -0.70561200 |
| H  | -0.09398600 | 2.60512500  | 1.05529600  |
| H  | -3.16688400 | -1.69784900 | 0.70881400  |
| H  | -3.75507200 | 0.66831200  | 0.99779400  |
| H  | -3.84963200 | -0.36017000 | -1.23297500 |

### Zr\_5\_I

E(B3LYP/BS1) = -646.418632 au

H(B3LYP/BS1) = -646.256955 au

G(B3LYP/BS1) = -646.311557 au

E(B3LYP/BS2//B3LYP/BS1, solvent = dichloromethane) = -647.175293 au

E(M06/BS2//B3LYP/BS1, solvent = dichloromethane) = -646.860602 au

|    |             |             |             |
|----|-------------|-------------|-------------|
| C  | 2.09363300  | -1.18665400 | -0.79378800 |
| H  | 2.41663200  | -1.47983600 | -1.78732700 |
| C  | 1.09280300  | -1.83778700 | -0.01931500 |
| H  | 0.51085500  | -2.70087600 | -0.32010600 |
| C  | 0.99127100  | -1.15245200 | 1.22213000  |
| H  | 0.33340900  | -1.41592300 | 2.04205300  |
| C  | 2.63134900  | -0.12158700 | -0.02055800 |
| H  | 3.41885300  | 0.55592900  | -0.33000500 |
| C  | 1.95101500  | -0.08952900 | 1.22140800  |
| H  | 2.14272200  | 0.59419600  | 2.03737800  |
| C  | 0.35913700  | 2.39595100  | 0.45947900  |
| O  | -1.69362000 | 0.03020800  | -0.19964400 |
| Si | -3.27096900 | -0.49846800 | 0.20807600  |
| H  | 1.35649700  | 2.84289900  | 0.35831700  |
| H  | -0.36369600 | 2.99458000  | -0.12976400 |
| H  | 0.05689800  | 2.48649500  | 1.51056000  |
| H  | -3.11606400 | -1.65030000 | 1.12560300  |
| H  | -3.95792400 | 0.63526100  | 0.86179400  |
| H  | -3.92959200 | -0.89287500 | -1.05635500 |

Zr 0.14396700 0.41799200 -0.45110500

### Hf\_5\_I

E(B3LYP/BS1) = -648.755179 au

H(B3LYP/BS1) = -648.593496 au

G(B3LYP/BS1) = -648.648435 au

E(B3LYP/BS2//B3LYP/BS1, solvent = dichloromethane) = -648.132328 au

E(M06/BS2//B3LYP/BS1, solvent = dichloromethane) = -647.828185 au

|    |             |             |             |
|----|-------------|-------------|-------------|
| C  | 2.01438800  | -1.25421300 | -0.80571900 |
| H  | 2.24438200  | -1.56170100 | -1.82058100 |
| C  | 1.11903800  | -1.91497900 | 0.07861200  |
| H  | 0.52845600  | -2.79512800 | -0.14640800 |
| C  | 1.11851900  | -1.19961200 | 1.31093400  |
| H  | 0.55940900  | -1.46639100 | 2.20065500  |
| C  | 2.60487300  | -0.16068500 | -0.10716300 |
| H  | 3.34295900  | 0.52590500  | -0.50571100 |
| C  | 2.05880000  | -0.12395100 | 1.19744300  |
| H  | 2.31036100  | 0.58443300  | 1.97555300  |
| C  | 0.24270800  | 2.31073500  | 0.53688700  |
| O  | -1.71331800 | -0.11659000 | -0.10259100 |
| Si | -3.33299400 | -0.57567900 | 0.22439900  |
| H  | 1.20742500  | 2.81346400  | 0.38799500  |
| H  | -0.53916700 | 2.90679100  | 0.03157900  |
| H  | 0.01568600  | 2.37393100  | 1.61138100  |
| H  | -3.28443600 | -1.92842200 | 0.82209500  |
| H  | -3.88800000 | 0.42152300  | 1.16332800  |
| H  | -4.03975100 | -0.57281200 | -1.07427000 |
| Hf | 0.09668300  | 0.30204000  | -0.28100600 |

### Ti\_5\_II

E(B3LYP/BS1) = -736.528430 au

H(B3LYP/BS1) = -736.307866 au

G(B3LYP/BS1) = -736.369000 au

E(B3LYP/BS2//B3LYP/BS1, solvent = dichloromethane) = -1528.150852 au

E(M06/BS2//B3LYP/BS1, solvent = dichloromethane) = -1527.768855 au

|    |             |             |             |
|----|-------------|-------------|-------------|
| C  | 1.82337400  | -0.63950500 | -1.33813200 |
| H  | 2.11904700  | -0.09610600 | -2.22712200 |
| C  | 0.74541700  | -1.55356700 | -1.25331700 |
| H  | 0.06154400  | -1.81342400 | -2.05144800 |
| C  | 0.69847900  | -2.04159700 | 0.08035100  |
| H  | -0.01565100 | -2.75711700 | 0.47025700  |
| C  | 2.46088700  | -0.57987800 | -0.06602100 |
| H  | 3.31853700  | 0.03065900  | 0.18828400  |
| C  | 1.77208200  | -1.44579300 | 0.81079900  |
| H  | 2.01535000  | -1.63321700 | 1.84726000  |
| Ti | 0.14195200  | 0.17753300  | 0.20424500  |
| C  | 0.30347000  | 0.58360500  | 2.21874800  |
| O  | -1.59646600 | 0.04211400  | 0.01299800  |
| Si | -3.23794400 | -0.37947900 | -0.21127700 |
| H  | 1.31195900  | 0.84268000  | 2.55756100  |
| H  | -0.37185500 | 1.44369000  | 2.34771600  |
| H  | -0.07800700 | -0.23823300 | 2.83660800  |
| H  | -3.25862000 | -1.69966400 | -0.88175300 |
| H  | -3.86495800 | -0.43053100 | 1.12648800  |

|   |             |            |             |
|---|-------------|------------|-------------|
| H | -3.83268900 | 0.67464300 | -1.06265000 |
| C | -0.00137300 | 2.59556300 | -0.60255300 |
| H | -0.56791500 | 2.48273500 | -1.52518000 |
| H | -0.55868700 | 2.91430900 | 0.27613100  |
| C | 1.34372200  | 2.48147400 | -0.58079600 |
| H | 1.91165800  | 2.27586300 | -1.48275500 |
| H | 1.91391200  | 2.67196700 | 0.32662100  |

### Zr\_5\_II

E(B3LYP/BS1) = -725.046000 au

H(B3LYP/BS1) = -724.826628 au

G(B3LYP/BS1) = -724.891000 au

E(B3LYP/BS2//B3LYP/BS1, solvent = dichloromethane) = -725.782000 au

E(M06/BS2//B3LYP/BS1, solvent = dichloromethane) = -725.395011 au

|    |             |             |             |
|----|-------------|-------------|-------------|
| C  | 2.09226500  | -0.54184200 | -1.21924900 |
| H  | 2.59422400  | 0.11010900  | -1.92282700 |
| C  | 0.97007200  | -1.36858500 | -1.50801100 |
| H  | 0.44170400  | -1.42443000 | -2.45223500 |
| C  | 0.67934200  | -2.12521800 | -0.34399200 |
| H  | -0.10447700 | -2.86725500 | -0.24706400 |
| C  | 2.50291200  | -0.80302600 | 0.11822800  |
| H  | 3.33743000  | -0.33971200 | 0.63112500  |
| C  | 1.63312700  | -1.77272000 | 0.66488700  |
| H  | 1.69437400  | -2.19779400 | 1.65767600  |
| C  | 0.21819100  | 0.28940700  | 2.44442200  |
| O  | -1.78120100 | 0.01543000  | -0.06022900 |
| Si | -3.39802400 | -0.41038900 | -0.38002500 |
| H  | 1.22327400  | 0.50623200  | 2.83034500  |
| H  | -0.45378300 | 1.12379400  | 2.71557700  |
| H  | -0.15363400 | -0.59839400 | 2.97226800  |
| H  | -3.38585300 | -1.70456800 | -1.10162400 |
| H  | -4.10303200 | -0.52272900 | 0.91560400  |
| H  | -3.97567400 | 0.66370600  | -1.22023800 |
| C  | 0.23533600  | 2.80673200  | -0.23544100 |
| H  | -0.75482300 | 2.90189300  | -0.68060700 |
| H  | 0.33141800  | 3.08536300  | 0.81508700  |
| C  | 1.32414300  | 2.54066600  | -0.99008800 |
| H  | 1.24556500  | 2.37633700  | -2.06218300 |
| H  | 2.32732000  | 2.55814200  | -0.57013500 |
| Zr | 0.09064000  | 0.19497100  | 0.24842200  |

### Hf\_5\_II

E(B3LYP/BS1) = -727.387000 au

H(B3LYP/BS1) = -727.167879 au

G(B3LYP/BS1) = -727.232000 au

E(B3LYP/BS2//B3LYP/BS1, solvent = dichloromethane) = -726.742101 au

E(M06/BS2//B3LYP/BS1, solvent = dichloromethane) = -726.368097 au

|   |            |             |             |
|---|------------|-------------|-------------|
| C | 1.83630200 | -0.78150100 | -1.44593400 |
| H | 2.06613600 | -0.30831600 | -2.39321000 |
| C | 0.84236800 | -1.76984000 | -1.23764900 |
| H | 0.16151700 | -2.16121900 | -1.98364000 |
| C | 0.89554900 | -2.15564300 | 0.13279900  |
| H | 0.27948500 | -2.91350900 | 0.60362200  |
| C | 2.52587300 | -0.57571200 | -0.21242300 |

|    |             |             |             |
|----|-------------|-------------|-------------|
| H  | 3.36364400  | 0.09297100  | -0.05531200 |
| C  | 1.95184500  | -1.42545600 | 0.75939000  |
| H  | 2.26060000  | -1.51767600 | 1.79182900  |
| C  | 0.17441300  | 0.58888700  | 2.29641000  |
| O  | -1.77555500 | -0.08518500 | -0.12695100 |
| Si | -3.41362900 | -0.50391800 | -0.33093400 |
| H  | 1.15262100  | 0.93997500  | 2.65354900  |
| H  | -0.56941600 | 1.37295800  | 2.51728800  |
| H  | -0.09736300 | -0.27044900 | 2.92693200  |
| H  | -3.45662800 | -1.82941300 | -0.99013500 |
| H  | -4.04125800 | -0.54410100 | 1.00773800  |
| H  | -4.02405600 | 0.53973000  | -1.18563800 |
| C  | 0.00154100  | 2.62039100  | -0.69309800 |
| H  | -0.68806300 | 2.53072800  | -1.53196900 |
| H  | -0.41704600 | 2.97677700  | 0.24926800  |
| C  | 1.33560700  | 2.47234900  | -0.85560100 |
| H  | 1.76969300  | 2.23666500  | -1.82326700 |
| H  | 2.03167200  | 2.65790000  | -0.03904500 |
| Hf | 0.06698200  | 0.14017300  | 0.15885100  |

### TS<sub>Ti-5</sub>

E(B3LYP/BS1) = -736.519000 au

H(B3LYP/BS1) = -736.298627 au

G(B3LYP/BS1) = -736.356000 au

E(B3LYP/BS2//B3LYP/BS1, solvent = dichloromethane) = -1528.139130 au

E(M06/BS2//B3LYP/BS1, solvent = dichloromethane) = -1527.762338 au

|    |             |             |             |
|----|-------------|-------------|-------------|
| C  | 1.63661800  | -1.05673800 | -1.26617300 |
| H  | 1.66181500  | -0.91915200 | -2.33961400 |
| C  | 0.79131200  | -1.95525200 | -0.56246800 |
| H  | 0.03199400  | -2.59140800 | -0.99981300 |
| C  | 1.07473000  | -1.82561400 | 0.82085900  |
| H  | 0.59185800  | -2.36948100 | 1.62411600  |
| C  | 2.48788500  | -0.41664500 | -0.31694900 |
| H  | 3.24703000  | 0.32238100  | -0.54213100 |
| C  | 2.14381100  | -0.88526000 | 0.96451800  |
| H  | 2.59774800  | -0.58207700 | 1.89985900  |
| Ti | 0.14715300  | 0.17841300  | 0.11481300  |
| C  | 0.32678800  | 1.65973500  | 1.60966000  |
| O  | -1.58871000 | -0.08039500 | 0.03007800  |
| Si | -3.21385200 | -0.60341400 | -0.04522200 |
| H  | 1.28178100  | 2.02404000  | 1.98768300  |
| H  | -0.49441600 | 2.28635900  | 1.95631700  |
| H  | 0.15084800  | 0.64423700  | 2.08381300  |
| H  | -3.19103700 | -2.06579800 | -0.27409900 |
| H  | -3.84084600 | -0.25957800 | 1.24976300  |
| H  | -3.84534000 | 0.11786800  | -1.17202100 |
| C  | 0.40024500  | 1.72458800  | -1.44957000 |
| H  | 1.35397100  | 1.63343100  | -1.95721100 |
| H  | -0.48534000 | 1.54024000  | -2.05768200 |
| C  | 0.29197400  | 2.61352000  | -0.36831600 |
| H  | 1.15785600  | 3.18137800  | -0.04464500 |
| H  | -0.67184600 | 3.05343500  | -0.13710400 |

### TS<sub>Zr-5</sub>

E(B3LYP/BS1) = -725.032000 au

H(B3LYP/BS1) = -724.812661 au  
 G(B3LYP/BS1) = -724.872000 au  
 E(B3LYP/BS2//B3LYP/BS1, solvent = dichloromethane) = -725.782000 au  
 E(M06/BS2//B3LYP/BS1, solvent = dichloromethane) = -725.381416 au

|    |             |             |             |
|----|-------------|-------------|-------------|
| C  | 1.60867200  | -1.33673600 | -1.26357600 |
| H  | 1.56259200  | -1.31937400 | -2.34597000 |
| C  | 0.83547200  | -2.17289800 | -0.40887700 |
| H  | 0.08209200  | -2.88545900 | -0.72316100 |
| C  | 1.22295100  | -1.90311100 | 0.93080600  |
| H  | 0.83556200  | -2.39440700 | 1.81627100  |
| C  | 2.50776300  | -0.58832500 | -0.45091000 |
| H  | 3.24548800  | 0.11959400  | -0.80883000 |
| C  | 2.27007500  | -0.92812100 | 0.89860600  |
| H  | 2.80584400  | -0.54509600 | 1.75882000  |
| C  | 0.35580000  | 1.85570100  | 1.56811400  |
| O  | -1.82327000 | -0.11904100 | 0.01002300  |
| Si | -3.46970100 | -0.54545400 | -0.07185800 |
| H  | 1.10116000  | 2.51095100  | 2.01664900  |
| H  | -0.64776900 | 2.24440200  | 1.77159300  |
| H  | 0.47245800  | 0.88226600  | 2.13552600  |
| H  | -3.54587600 | -2.00022100 | -0.33891800 |
| H  | -4.08427000 | -0.20583600 | 1.23162600  |
| H  | -4.07621100 | 0.23598300  | -1.17316300 |
| C  | 0.45904500  | 1.79916000  | -1.50379000 |
| H  | 1.27527900  | 1.48120600  | -2.14606100 |
| H  | -0.50486600 | 1.93308700  | -1.99762800 |
| C  | 0.76432000  | 2.65014600  | -0.41653700 |
| H  | 1.80400200  | 2.86056600  | -0.18716200 |
| H  | 0.06560000  | 3.42761900  | -0.12433000 |
| Zr | 0.06565700  | 0.14971300  | 0.09793900  |

### TS<sub>Hf-5</sub>

E(B3LYP/BS1) = -727.387000 au  
 H(B3LYP/BS1) = -727.152680 au  
 G(B3LYP/BS1) = -727.232000 au  
 E(B3LYP/BS2//B3LYP/BS1, solvent = dichloromethane) = -726.742000 au  
 E(M06/BS2//B3LYP/BS1, solvent = dichloromethane) = -726.352289 au

|    |             |             |             |
|----|-------------|-------------|-------------|
| C  | -1.65864800 | -1.28114900 | 1.27853700  |
| H  | -1.64461800 | -1.24131100 | 2.36104300  |
| C  | -0.87911300 | -2.15296500 | 0.46565800  |
| H  | -0.15510500 | -2.87811000 | 0.81790800  |
| C  | -1.22101900 | -1.90503400 | -0.89270000 |
| H  | -0.82235500 | -2.42852800 | -1.75424200 |
| C  | -2.51178400 | -0.52746300 | 0.42257600  |
| H  | -3.24140100 | 0.20689900  | 0.74186800  |
| C  | -2.24399300 | -0.90618000 | -0.91233600 |
| H  | -2.74332300 | -0.52799600 | -1.79628200 |
| C  | -0.25241200 | 1.77183600  | -1.56015200 |
| O  | 1.79381300  | -0.20193000 | 0.00294700  |
| Si | 3.43976200  | -0.62659600 | 0.08063400  |
| H  | -1.01119200 | 2.39256900  | -2.03560000 |
| H  | 0.74322100  | 2.16324700  | -1.79093300 |
| H  | -0.34971300 | 0.77678000  | -2.10352500 |
| H  | 3.51939600  | -2.09314600 | 0.26806300  |

|    |             |             |             |
|----|-------------|-------------|-------------|
| H  | 4.06625700  | -0.21195200 | -1.19493100 |
| H  | 4.03040500  | 0.09586900  | 1.22971500  |
| C  | -0.35369600 | 1.76485400  | 1.50662700  |
| H  | -1.19149400 | 1.52031100  | 2.15420000  |
| H  | 0.60999300  | 1.86864500  | 2.00851000  |
| C  | -0.60857400 | 2.62761300  | 0.41100700  |
| H  | -1.63386100 | 2.89392700  | 0.17440500  |
| H  | 0.13330500  | 3.35976200  | 0.10883100  |
| Hf | -0.06168400 | 0.11308000  | -0.06467700 |

### **Ti\_5\_III**

E(B3LYP/BS1) = -736.545000 au

H(B3LYP/BS1) = -736.322998 au

G(B3LYP/BS1) = -736.382000 au

E(B3LYP/BS2//B3LYP/BS1, solvent = dichloromethane) = -1528.170000 au

E(M06/BS2//B3LYP/BS1, solvent = dichloromethane) = -1527.792413 au

|    |             |             |             |
|----|-------------|-------------|-------------|
| C  | 1.39011500  | -1.52146100 | -1.21298100 |
| H  | 1.65960300  | -1.31141800 | -2.24192800 |
| C  | 0.22695200  | -2.21633300 | -0.78028300 |
| H  | -0.55855900 | -2.60836300 | -1.41494600 |
| C  | 0.25556100  | -2.26253000 | 0.64111200  |
| H  | -0.49196200 | -2.72228400 | 1.27758900  |
| C  | 2.15951700  | -1.18462300 | -0.06298600 |
| H  | 3.09774300  | -0.64438300 | -0.06540800 |
| C  | 1.46253300  | -1.63144000 | 1.08051600  |
| H  | 1.77898900  | -1.51334100 | 2.10897300  |
| Ti | -0.02675800 | -0.08855100 | 0.03533100  |
| C  | 0.80614800  | 1.42753000  | 1.14584700  |
| O  | -1.74525000 | 0.26154900  | -0.02500700 |
| Si | -3.44546200 | 0.46909500  | -0.08966100 |
| H  | -4.01417400 | -0.78602000 | -0.62767300 |
| H  | -3.90058000 | 0.73509900  | 1.29186600  |
| H  | -3.69453600 | 1.61847600  | -0.98665100 |
| C  | 2.37059800  | 2.71902300  | -0.46190100 |
| C  | 0.98953100  | 2.10219200  | -0.20051600 |
| H  | 1.72840300  | 1.26158800  | 1.69970900  |
| H  | 0.02397800  | 1.86884800  | 1.76943100  |
| H  | 3.17110300  | 1.99308200  | -0.28954200 |
| H  | 2.44931900  | 3.09001800  | -1.48774300 |
| H  | 2.52152600  | 3.56028100  | 0.22051600  |
| H  | 0.86624400  | 1.33905400  | -1.06132200 |
| H  | 0.18433500  | 2.81361600  | -0.40766400 |

### **Zr\_5\_III**

E(B3LYP/BS1) = -725.712723 au

H(B3LYP/BS1) = -725.492454 au

G(B3LYP/BS1) = -725.554253 au

E(B3LYP/BS2//B3LYP/BS1, solvent = dichloromethane) = -725.804099 au

E(M06/BS2//B3LYP/BS1, solvent = dichloromethane) = -725.422441 au

|   |             |             |             |
|---|-------------|-------------|-------------|
| C | 1.47343700  | -1.71489100 | -1.16421100 |
| H | 1.76114300  | -1.60447500 | -2.20055700 |
| C | 0.31742500  | -2.38884800 | -0.68907000 |
| H | -0.43881000 | -2.86548600 | -1.29623600 |
| C | 0.33756200  | -2.33519500 | 0.72762300  |



|    |             |             |             |
|----|-------------|-------------|-------------|
| H  | -0.39127100 | -2.78184200 | 1.38953600  |
| C  | 2.22142300  | -1.27928700 | -0.04109500 |
| H  | 3.16252400  | -0.75093500 | -0.07498500 |
| C  | 1.52248400  | -1.64839400 | 1.12501800  |
| H  | 1.83975000  | -1.46920400 | 2.14100300  |
| C  | 0.87279300  | 1.59652200  | 1.12969600  |
| O  | -1.94964600 | 0.29809700  | -0.06906200 |
| Si | -3.63085500 | 0.48068500  | -0.06324800 |
| H  | -4.20389600 | -0.65445700 | -0.81004200 |
| H  | -4.07124200 | 0.47744200  | 1.34352800  |
| H  | -3.92901500 | 1.76545100  | -0.72205900 |
| C  | 2.58474200  | 2.75527800  | -0.44078300 |
| C  | 1.16185500  | 2.23713400  | -0.21913100 |
| H  | 1.76728600  | 1.41052600  | 1.71704700  |
| H  | 0.13115900  | 2.14440200  | 1.71214400  |
| H  | 3.32641400  | 1.98835900  | -0.21375100 |
| H  | 2.73436600  | 3.09335400  | -1.46692800 |
| H  | 2.75999900  | 3.60009100  | 0.22637200  |
| H  | 1.01647400  | 1.47845100  | -1.08985600 |
| H  | 0.42339500  | 3.00076200  | -0.47181900 |
| Zr | -0.06023700 | -0.03201800 | -0.03284300 |

### Hf\_5\_III

E(B3LYP/BS1) = -727.391000 au

H(B3LYP/BS1) = -727.169257 au

G(B3LYP/BS1) = -727.232000 au

E(B3LYP/BS2//B3LYP/BS1, solvent = dichloromethane) = -726.759000 au

E(M06/BS2//B3LYP/BS1, solvent = dichloromethane) = -726.392547 au

|    |             |             |             |
|----|-------------|-------------|-------------|
| C  | 1.53071200  | -1.62700600 | -1.18275600 |
| H  | 1.80753800  | -1.49754200 | -2.22329800 |
| C  | 0.40424300  | -2.35507800 | -0.70389300 |
| H  | -0.33799400 | -2.86037100 | -1.31100900 |
| C  | 0.43075900  | -2.30890500 | 0.72171900  |
| H  | -0.27073800 | -2.80139900 | 1.38619700  |
| C  | 2.27351900  | -1.17002100 | -0.05597200 |
| H  | 3.19217100  | -0.59750800 | -0.09220800 |
| C  | 1.59913800  | -1.58272100 | 1.11686100  |
| H  | 1.91734600  | -1.39705800 | 2.13476900  |
| C  | 0.78296800  | 1.60009600  | 1.13730500  |
| O  | -1.89831800 | 0.22640200  | -0.07051300 |
| Si | -3.59560200 | 0.41878500  | -0.06915400 |
| H  | -4.18233700 | -0.82063600 | -0.62523300 |
| H  | -4.01600900 | 0.63868600  | 1.33189300  |
| H  | -3.89634700 | 1.59180600  | -0.91947100 |
| C  | 2.42885700  | 2.87664000  | -0.43870900 |
| C  | 1.04238200  | 2.25712100  | -0.23341100 |
| H  | 1.70124400  | 1.48487900  | 1.71530600  |
| H  | 0.04515400  | 2.16328000  | 1.71717300  |
| H  | 3.22171900  | 2.15478200  | -0.22003000 |
| H  | 2.55911000  | 3.24317100  | -1.46135500 |
| H  | 2.54167900  | 3.72232600  | 0.24619800  |
| H  | 0.96550000  | 1.48311800  | -1.10242400 |
| H  | 0.25038500  | 2.96781800  | -0.49361200 |
| Hf | -0.04067900 | -0.04569900 | -0.00996500 |

### Ti\_5\_IV

E(B3LYP/BS1) = -736.161256 au

H(B3LYP/BS1) = -735.951737 au

G(B3LYP/BS1) = -736.010579 au

E(B3LYP/BS2//B3LYP/BS1, solvent = dichloromethane) = -1527.721479 au

E(M06/BS2//B3LYP/BS1, solvent = dichloromethane) = -1527.34894042 au

|    |             |             |             |
|----|-------------|-------------|-------------|
| C  | -0.77354900 | -1.95496100 | 0.70959400  |
| H  | -0.07609200 | -2.48718700 | 1.34448200  |
| C  | -0.77393500 | -1.95468800 | -0.71019900 |
| H  | -0.07682800 | -2.48667400 | -1.34567300 |
| C  | -1.82011700 | -1.10258500 | -1.14868200 |
| H  | -2.06724400 | -0.87723700 | -2.17709600 |
| C  | -1.81948300 | -1.10301900 | 1.14898000  |
| H  | -2.06601500 | -0.87804000 | 2.17761700  |
| C  | -2.46239100 | -0.57850700 | 0.00042500  |
| H  | -3.27709200 | 0.13520400  | 0.00076600  |
| Ti | -0.15283900 | 0.21977000  | -0.00004000 |
| O  | 1.65191800  | 0.04730400  | -0.00011200 |
| Si | 3.22018000  | -0.48210400 | 0.00000700  |
| H  | 3.26681100  | -1.97205200 | 0.00045500  |
| H  | 3.93419200  | 0.01247300  | -1.20904000 |
| H  | 3.93424700  | 0.01319900  | 1.20872400  |
| C  | -0.51551800 | 1.72754200  | -1.32446500 |
| C  | -0.51537300 | 1.72745700  | 1.32451300  |
| C  | -0.52273300 | 2.59137200  | 0.00003600  |
| H  | -1.43321500 | 3.19506400  | 0.00011000  |
| H  | 0.34502100  | 3.25512300  | 0.00002200  |
| H  | -1.44483300 | 1.80903400  | -1.88742900 |
| H  | 0.34435100  | 1.94633600  | -1.96182700 |
| H  | -1.44464200 | 1.80890500  | 1.88755700  |
| H  | 0.34453700  | 1.94626500  | 1.96181400  |

### Ti\_5\_V

E(B3LYP/BS1) = -776.683093 au

H(B3LYP/BS1) = -776.422165 au

G(B3LYP/BS1) = -776.488012 au

E(B3LYP/BS2//B3LYP/BS1, solvent = dichloromethane) = -1568.259128 au

E(M06/BS2//B3LYP/BS1, solvent = dichloromethane) = -1567.846656 au

|    |             |             |             |
|----|-------------|-------------|-------------|
| C  | -1.14001700 | 1.65831700  | -1.14645700 |
| H  | -1.44839300 | 1.52411400  | -2.17418900 |
| C  | 0.12509500  | 2.13526300  | -0.71221700 |
| H  | 0.95315200  | 2.41692400  | -1.35070000 |
| C  | 0.12866300  | 2.13703100  | 0.70534700  |
| H  | 0.95995500  | 2.42016000  | 1.33894600  |
| C  | -1.91608600 | 1.37153500  | 0.00263900  |
| H  | -2.91155000 | 0.94646800  | 0.00574900  |
| C  | -1.13415200 | 1.66105500  | 1.14709900  |
| H  | -1.43726600 | 1.52912200  | 2.17670100  |
| Ti | 0.02455900  | -0.12335800 | -0.00061400 |
| O  | 1.80308700  | -0.46957800 | -0.00090900 |
| Si | 3.45839300  | -0.43102800 | 0.00043200  |
| H  | 3.94509700  | 0.97802900  | -0.00056600 |
| H  | 3.98887800  | -1.11451100 | 1.21133000  |
| H  | 3.99088500  | -1.11696100 | -1.20818700 |

|   |             |             |             |
|---|-------------|-------------|-------------|
| C | -0.61960700 | -1.27620900 | 1.63164000  |
| C | -0.62079700 | -1.27723500 | -1.63169800 |
| H | -0.04797000 | -0.90275200 | 2.49616200  |
| H | -0.15307400 | -2.23665900 | 1.35104200  |
| H | -0.05244600 | -0.90229500 | -2.49773500 |
| H | -0.15137900 | -2.23671200 | -1.35264200 |
| C | -2.08824100 | -1.49201800 | 2.00002200  |
| C | -2.09001800 | -1.49628700 | -1.99587400 |
| H | -2.56160100 | -0.56861400 | 2.35520100  |
| H | -2.67502700 | -1.84807800 | 1.14430800  |
| H | -2.20418300 | -2.23994000 | 2.79796600  |
| H | -2.56657400 | -0.57391800 | -2.34945500 |
| H | -2.20655000 | -2.24429400 | -2.79365400 |
| H | -2.67349500 | -1.85390400 | -1.13854800 |

### Zr\_5\_IV

E(B3LYP/BS1) = -724.666783 au

H(B3LYP/BS1) = -724.460466 au

G(B3LYP/BS1) = -724.514269 au

E(B3LYP/BS2//B3LYP/BS1, solvent = dichloromethane) = -725.336792 au

E(M06/BS2//B3LYP/BS1, solvent = dichloromethane) = -724.960585 au

|    |             |             |             |
|----|-------------|-------------|-------------|
| C  | -0.98449500 | -2.09225400 | 0.71009500  |
| H  | -0.35454200 | -2.70301700 | 1.34613000  |
| C  | -0.98479500 | -2.09194400 | -0.71072800 |
| H  | -0.35511900 | -2.70243800 | -1.34729500 |
| C  | -1.95996800 | -1.15421700 | -1.14898900 |
| H  | -2.20167700 | -0.92169300 | -2.17768400 |
| C  | -1.95947300 | -1.15470900 | 1.14917200  |
| H  | -2.20073200 | -0.92260800 | 2.17807000  |
| C  | -2.56187900 | -0.58384800 | 0.00034300  |
| H  | -3.33139000 | 0.17846400  | 0.00067700  |
| O  | 1.90656200  | -0.10908900 | -0.00008400 |
| Si | 3.52429500  | -0.45579000 | -0.00003400 |
| H  | 3.74469200  | -1.93002700 | 0.00119300  |
| H  | 4.18235100  | 0.11427800  | -1.20836600 |
| H  | 4.18270300  | 0.11634200  | 1.20713000  |
| C  | -0.50696900 | 1.83833500  | -1.33763700 |
| C  | -0.50685600 | 1.83818000  | 1.33782200  |
| C  | -0.91910600 | 2.58528500  | 0.00015300  |
| H  | -2.00618900 | 2.70002800  | 0.00020500  |
| H  | -0.47203000 | 3.58526800  | 0.00019200  |
| H  | -1.29531900 | 1.88209500  | -2.08902100 |
| H  | 0.41760800  | 2.25770800  | -1.75500800 |
| H  | -1.29514200 | 1.88185100  | 2.08927900  |
| H  | 0.41775900  | 2.25750200  | 1.75516100  |
| Zr | -0.04310900 | 0.15877600  | -0.00002200 |

### Zr\_5\_V

E(B3LYP/BS1) = -765.194329 au

H(B3LYP/BS1) = -764.935580 au

G(B3LYP/BS1) = -765.001351 au

E(B3LYP/BS2//B3LYP/BS1, solvent = dichloromethane) = -765.878921 au

E(M06/BS2//B3LYP/BS1, solvent = dichloromethane) = -765.461948 au

|   |             |            |             |
|---|-------------|------------|-------------|
| C | -1.35073000 | 1.70694600 | -1.14880400 |
|---|-------------|------------|-------------|

|    |             |             |             |
|----|-------------|-------------|-------------|
| H  | -1.65406900 | 1.55992900  | -2.17689700 |
| C  | -0.13146500 | 2.29640800  | -0.71349400 |
| H  | 0.65684500  | 2.67691800  | -1.35204200 |
| C  | -0.12872500 | 2.29863100  | 0.70614100  |
| H  | 0.66208000  | 2.68105500  | 1.34043600  |
| C  | -2.09870300 | 1.35267000  | 0.00158900  |
| H  | -3.06317900 | 0.85972800  | 0.00429900  |
| C  | -1.34624200 | 1.71045600  | 1.14796700  |
| H  | -1.64558300 | 1.56651600  | 2.17767600  |
| O  | 2.00806900  | -0.31811500 | -0.00021000 |
| Si | 3.66318200  | -0.27823000 | 0.00062100  |
| H  | 4.15178700  | 1.12997500  | -0.00206900 |
| H  | 4.19974800  | -0.95908800 | 1.21099700  |
| H  | 4.20106300  | -0.96418800 | -1.20628000 |
| C  | -0.58254000 | -1.35798700 | 1.77777400  |
| C  | -0.58295400 | -1.36068100 | -1.77655300 |
| H  | -0.07125800 | -0.96017700 | 2.67023800  |
| H  | -0.06128200 | -2.30911100 | 1.54940700  |
| H  | -0.07422000 | -0.96274300 | -2.67040200 |
| H  | -0.05947300 | -2.31060200 | -1.54831500 |
| C  | -2.05537300 | -1.64966200 | 2.09847100  |
| C  | -2.05589100 | -1.65548000 | -2.09400400 |
| H  | -2.58491000 | -0.74365700 | 2.41840300  |
| H  | -2.59364700 | -2.04434800 | 1.22659600  |
| H  | -2.17163700 | -2.39051000 | 2.90293000  |
| H  | -2.58776900 | -0.75086700 | -2.41397500 |
| H  | -2.17234100 | -2.39750200 | -2.89735500 |
| H  | -2.59172100 | -2.05015000 | -1.22061500 |
| Zr | 0.05265500  | -0.13097100 | -0.00036400 |

#### Hf\_5\_IV

E(B3LYP/BS1) = -727.013356 au

H(B3LYP/BS1) = -726.805764 au

G(B3LYP/BS1) = -726.862334 au

E(B3LYP/BS2//B3LYP/BS1, solvent = dichloromethane) = -726.302480 au

E(M06/BS2//B3LYP/BS1, solvent = dichloromethane) = -725.937969 au

|    |             |             |             |
|----|-------------|-------------|-------------|
| C  | -1.04713500 | -2.09044700 | 0.70827600  |
| H  | -0.44225000 | -2.72672900 | 1.34347700  |
| C  | -1.04812100 | -2.08815900 | -0.71295400 |
| H  | -0.44407500 | -2.72233300 | -1.35106000 |
| C  | -1.98573700 | -1.11239800 | -1.14899700 |
| H  | -2.21690100 | -0.86758200 | -2.17727600 |
| C  | -1.98404100 | -1.11597200 | 1.14877600  |
| H  | -2.21365700 | -0.87427200 | 2.17815500  |
| C  | -2.56394900 | -0.51878300 | 0.00123900  |
| H  | -3.30235700 | 0.27363700  | 0.00306100  |
| O  | 1.85559800  | -0.23959900 | 0.00172800  |
| Si | 3.47964500  | -0.56169700 | -0.00025300 |
| H  | 3.82660400  | -1.47914700 | -1.12080200 |
| H  | 4.25514700  | 0.69832400  | -0.16152300 |
| H  | 3.88430700  | -1.20771100 | 1.27884400  |
| C  | -0.36351700 | 1.81315800  | -1.32804600 |
| C  | -0.36700200 | 1.81402200  | 1.32734000  |
| C  | -0.75657800 | 2.58794800  | -0.00112600 |
| H  | -1.83877300 | 2.74494800  | -0.00267000 |

|    |             |            |             |
|----|-------------|------------|-------------|
| H  | -0.27351500 | 3.57081400 | -0.00081600 |
| H  | -1.13524400 | 1.90051200 | -2.09417500 |
| H  | 0.58062700  | 2.19785000 | -1.73489000 |
| H  | -1.14130500 | 1.90089100 | 2.09095000  |
| H  | 0.57534000  | 2.19984000 | 1.73718500  |
| Hf | -0.04135100 | 0.11715700 | 0.00047500  |

### Hf\_5\_V

E(B3LYP/BS1) = -767.540519 au

H(B3LYP/BS1) = -767.280563 au

G(B3LYP/BS1) = -767.349161 au

E(B3LYP/BS2//B3LYP/BS1, solvent = dichloromethane) = -766.845313 au

E(M06/BS2//B3LYP/BS1, solvent = dichloromethane) = -766.439979 au

|    |             |             |             |
|----|-------------|-------------|-------------|
| C  | -1.40817800 | 1.69533900  | -1.14869300 |
| H  | -1.70452100 | 1.53387500  | -2.17674500 |
| C  | -0.21036400 | 2.32688000  | -0.71405500 |
| H  | 0.56317300  | 2.73619900  | -1.35277900 |
| C  | -0.20768300 | 2.32933400  | 0.70644500  |
| H  | 0.56833700  | 2.74072000  | 1.34080600  |
| C  | -2.14314800 | 1.31317600  | 0.00158100  |
| H  | -3.08933300 | 0.78595700  | 0.00433200  |
| C  | -1.40375800 | 1.69919200  | 1.14775400  |
| H  | -1.69617100 | 1.54112300  | 2.17746600  |
| O  | 1.96324600  | -0.21601200 | 0.00015000  |
| Si | 3.61980000  | -0.22811700 | 0.00102200  |
| H  | 4.14608800  | 1.16552000  | -0.00059700 |
| H  | 4.13067400  | -0.92584100 | 1.21186100  |
| H  | 4.13193200  | -0.92914800 | -1.20736800 |
| C  | -0.51694600 | -1.35767700 | 1.73848400  |
| C  | -0.51666400 | -1.36009600 | -1.73757600 |
| H  | -0.01866400 | -0.94813600 | 2.63470600  |
| H  | 0.03742100  | -2.29069400 | 1.51792000  |
| H  | -0.02211100 | -0.94935200 | -2.63530200 |
| H  | 0.04102500  | -2.29139000 | -1.51823100 |
| C  | -1.97529900 | -1.71142100 | 2.07643300  |
| C  | -1.97492700 | -1.71832600 | -2.07130700 |
| H  | -2.54018500 | -0.82889400 | 2.40163300  |
| H  | -2.50458700 | -2.12819200 | 1.20981700  |
| H  | -2.05160600 | -2.45560500 | 2.88211300  |
| H  | -2.54350300 | -0.83759400 | -2.39492800 |
| H  | -2.05126100 | -2.46281300 | -2.87670600 |
| H  | -2.50038000 | -2.13668200 | -1.20312300 |
| Hf | 0.03975400  | -0.07910700 | -0.00034400 |

### Zr\_6\_I

E(B3LYP/BS1) = -473.378000 au

H(B3LYP/BS1) = -473.160874 au

G(B3LYP/BS1) = -473.214000 au

E(B3LYP/BS2//B3LYP/BS1, solvent = dichloromethane) = -474.101000 au

E(M06/BS2//B3LYP/BS1, solvent = dichloromethane) = -473.706343 au

|    |             |             |             |
|----|-------------|-------------|-------------|
| Zr | 0.00007400  | 0.24145800  | -0.25695000 |
| C  | -2.20701700 | -0.72366500 | -1.03555900 |
| C  | -1.68782300 | -1.60527000 | -0.05612600 |
| C  | -2.51402100 | 0.51580900  | -0.40062700 |

|   |             |             |             |
|---|-------------|-------------|-------------|
| H | -2.36323000 | -0.95683500 | -2.08379300 |
| C | -1.66447900 | -0.90805200 | 1.19061300  |
| H | -1.39029800 | -2.63357700 | -0.21657300 |
| C | -2.20005900 | 0.39433300  | 0.97674800  |
| H | -2.94136800 | 1.38807700  | -0.88056500 |
| H | -1.37135300 | -1.32535600 | 2.14554500  |
| H | -2.34166700 | 1.15593400  | 1.73188700  |
| C | 2.20371900  | 0.40245900  | 0.96890100  |
| C | 1.66743000  | -0.89743200 | 1.19568100  |
| C | 2.51334400  | 0.51162400  | -0.41052900 |
| H | 2.34847000  | 1.17031200  | 1.71701600  |
| C | 1.68678200  | -1.60572700 | -0.04491300 |
| H | 1.37664800  | -1.30598500 | 2.15512400  |
| C | 2.20375100  | -0.73332900 | -1.03354900 |
| H | 2.94011500  | 1.37922900  | -0.89942400 |
| H | 1.38771700  | -2.63508600 | -0.19535300 |
| H | 2.35653300  | -0.97585700 | -2.08016000 |
| C | -0.00109400 | 2.42257700  | 0.12453300  |
| H | -0.88685600 | 2.92488900  | 0.51827800  |
| H | 0.89021800  | 2.92639100  | 0.50346800  |
| H | -0.01107100 | 2.58958500  | -0.98848400 |

### Hf\_6\_I

E(B3LYP/BS1) = -475.708000 au

H(B3LYP/BS1) = -475.491438 au

G(B3LYP/BS1) = -475.540000 au

E(B3LYP/BS2//B3LYP/BS1, solvent = dichloromethane) = -475.052000 au

E(M06/BS2//B3LYP/BS1, solvent = dichloromethane) = -474.667520 au

|    |             |             |             |
|----|-------------|-------------|-------------|
| C  | 1.87916700  | -0.75387800 | 1.23473000  |
| C  | 1.63409400  | -1.67793900 | 0.18087400  |
| C  | 2.37369600  | 0.45435700  | 0.65392200  |
| H  | 1.78193600  | -0.95816500 | 2.29501000  |
| C  | 1.92367600  | -1.03004200 | -1.04921600 |
| H  | 1.29025300  | -2.69719100 | 0.29682200  |
| C  | 2.39417900  | 0.28616800  | -0.75208400 |
| H  | 2.67655000  | 1.34407300  | 1.19119200  |
| H  | 1.85948300  | -1.47788800 | -2.03466800 |
| H  | 2.71921300  | 1.02602100  | -1.47394500 |
| C  | -2.39825800 | 0.29881800  | -0.73706100 |
| C  | -1.93058400 | -1.01304300 | -1.05701000 |
| C  | -2.36926700 | 0.44528400  | 0.67118100  |
| H  | -2.72692400 | 1.04981600  | -1.44553500 |
| C  | -1.63444900 | -1.68005300 | 0.16118200  |
| H  | -1.87244100 | -1.44567700 | -2.04963700 |
| C  | -1.87243000 | -0.77206400 | 1.23061800  |
| H  | -2.66798300 | 1.32713800  | 1.22364200  |
| H  | -1.29094100 | -2.70132200 | 0.25910700  |
| H  | -1.76949500 | -0.99284700 | 2.28701600  |
| C  | 0.00014500  | 2.41312000  | 0.04881300  |
| H  | 0.88557900  | 2.91173800  | -0.36418500 |
| H  | -0.88785500 | 2.91150200  | -0.35882900 |
| H  | 0.00342800  | 2.66150000  | 1.13002700  |
| Hf | -0.00000900 | 0.21134600  | -0.06210700 |

### Zr\_6\_II

E(B3LYP/BS1) = -551.994000 au  
 H(B3LYP/BS1) = -551.719249 au  
 G(B3LYP/BS1) = -551.778000 au  
 E(B3LYP/BS2//B3LYP/BS1, solvent = dichloromethane) = -552.712000 au  
 E(M06/BS2//B3LYP/BS1, solvent = dichloromethane) = -552.252377 au

|    |             |             |             |
|----|-------------|-------------|-------------|
| Zr | 0.00002700  | 0.04166000  | 0.15037800  |
| C  | 1.65379700  | -1.82338000 | -0.04263600 |
| C  | 1.62935900  | -1.21382500 | -1.33223100 |
| C  | 2.24804400  | -0.90540700 | 0.86737300  |
| H  | 1.34893100  | -2.83661900 | 0.18640300  |
| C  | 2.17589400  | 0.08374100  | -1.20872300 |
| H  | 1.28250700  | -1.67357200 | -2.24803700 |
| C  | 2.54730800  | 0.28074600  | 0.15368500  |
| H  | 2.43844100  | -1.08328500 | 1.91667900  |
| H  | 2.31996800  | 0.78823800  | -2.01882000 |
| H  | 3.02032000  | 1.16490000  | 0.56383800  |
| C  | -2.54713400 | 0.28117500  | 0.15270000  |
| C  | -2.17541000 | 0.08239100  | -1.20939100 |
| C  | -2.24833600 | -0.90416800 | 0.86792500  |
| H  | -3.02010900 | 1.16592400  | 0.56162000  |
| C  | -1.62917500 | -1.21545000 | -1.33113900 |
| H  | -2.31909600 | 0.78590600  | -2.02040900 |
| C  | -1.65402200 | -1.82337900 | -0.04078900 |
| H  | -2.43907300 | -1.08073900 | 1.91738700  |
| H  | -1.28214500 | -1.67640500 | -2.24626800 |
| H  | -1.34940000 | -2.83638400 | 0.18960300  |
| C  | 0.00024400  | 0.32124000  | 2.38263900  |
| H  | 0.89217100  | 0.88456300  | 2.68909200  |
| H  | -0.89150100 | 0.88478500  | 2.68922000  |
| H  | 0.00016200  | -0.61028700 | 2.96450600  |
| C  | 0.00066800  | 2.86555500  | 0.25317800  |
| H  | -0.92420600 | 2.94869200  | 0.81959900  |
| H  | 0.92729000  | 2.94823900  | 0.81680500  |
| C  | -0.00137900 | 2.79599300  | -1.09115600 |
| H  | 0.92218000  | 2.80383800  | -1.66388200 |
| H  | -0.92666000 | 2.80440000  | -1.66107200 |

## Hf\_6\_II

E(B3LYP/BS1) = -554.325000 au  
 H(B3LYP/BS1) = -554.049826 au  
 G(B3LYP/BS1) = -554.111000au  
 E(B3LYP/BS2//B3LYP/BS1, solvent = dichloromethane) = -553.670000 au  
 E(M06/BS2//B3LYP/BS1, solvent = dichloromethane) = -553.224133 au

|   |             |             |             |
|---|-------------|-------------|-------------|
| C | 1.51485800  | -1.88494300 | -0.28678600 |
| C | 1.59672400  | -1.06639200 | -1.45172000 |
| C | 2.10657000  | -1.17377100 | 0.79241300  |
| H | 1.12635800  | -2.89405100 | -0.24665800 |
| C | 2.23319200  | 0.14645700  | -1.08363500 |
| H | 1.27410400  | -1.33956800 | -2.44816700 |
| C | 2.53963600  | 0.08399100  | 0.30314700  |
| H | 2.20877800  | -1.52744400 | 1.81009100  |
| H | 2.47410800  | 0.96326600  | -1.75400100 |
| H | 3.03719900  | 0.84913000  | 0.88502700  |
| C | -2.50503200 | 0.37784500  | 0.03806600  |

|    |             |             |             |
|----|-------------|-------------|-------------|
| C  | -2.12479300 | -0.06310100 | -1.26762500 |
| C  | -2.26471000 | -0.67963600 | 0.94568700  |
| H  | -2.94254100 | 1.33659900  | 0.28854400  |
| C  | -1.64098100 | -1.38521700 | -1.15855400 |
| H  | -2.22691300 | 0.49849600  | -2.18835700 |
| C  | -1.69668700 | -1.76232300 | 0.21533400  |
| H  | -2.46759200 | -0.66641000 | 2.00754300  |
| H  | -1.29565800 | -2.00612000 | -1.97456800 |
| H  | -1.43282600 | -2.73093000 | 0.62133500  |
| C  | 0.07123800  | 0.59784300  | 2.27422100  |
| H  | 1.00072400  | 1.11036300  | 2.55517200  |
| H  | -0.77150300 | 1.24532200  | 2.55619500  |
| H  | 0.00319800  | -0.28272600 | 2.93250100  |
| C  | 0.41043700  | 2.84815300  | -0.05385600 |
| H  | -0.06458600 | 3.21645200  | 0.85170200  |
| H  | 1.49502100  | 2.79167800  | -0.04451300 |
| C  | -0.30592400 | 2.57808500  | -1.16351300 |
| H  | 0.17287500  | 2.28820100  | -2.09798800 |
| H  | -1.37639100 | 2.75188300  | -1.19974800 |
| Hf | 0.00247900  | 0.03741500  | 0.12259500  |

### TS<sub>Zr-6</sub>

E(B3LYP/BS1) = -551.983000 au

H(B3LYP/BS1) = -551.707735 au

G(B3LYP/BS1) = -551.764000 au

E(B3LYP/BS2//B3LYP/BS1, solvent = dichloromethane) = -552.700000 au

E(M06/BS2//B3LYP/BS1, solvent = dichloromethane) = -552.244892 au

|    |             |             |             |
|----|-------------|-------------|-------------|
| Zr | 0.00000600  | 0.06347700  | 0.05983400  |
| C  | 1.69499700  | -1.70172800 | 0.66921600  |
| C  | 1.63435700  | -1.68235600 | -0.75547900 |
| C  | 2.27973200  | -0.47952100 | 1.09444700  |
| H  | 1.40712100  | -2.52686100 | 1.30822800  |
| C  | 2.16127300  | -0.44389600 | -1.20114700 |
| H  | 1.28951100  | -2.48978100 | -1.38809400 |
| C  | 2.54677700  | 0.30665400  | -0.05515000 |
| H  | 2.48808200  | -0.19957600 | 2.11999400  |
| H  | 2.28006900  | -0.14132600 | -2.23339500 |
| H  | 3.00865500  | 1.28611300  | -0.06171700 |
| C  | -2.54681500 | 0.30633800  | -0.05658300 |
| C  | -2.16063200 | -0.44546700 | -1.20153000 |
| C  | -2.28020400 | -0.47842600 | 1.09404600  |
| H  | -3.00878700 | 1.28574500  | -0.06456700 |
| C  | -1.63386000 | -1.68338300 | -0.75416900 |
| H  | -2.27890300 | -0.14408800 | -2.23419100 |
| C  | -1.69510400 | -1.70107700 | 0.67052200  |
| H  | -2.48908000 | -0.19728400 | 2.11915700  |
| H  | -1.28862100 | -2.49152700 | -1.38565100 |
| H  | -1.40745800 | -2.52541200 | 1.31066700  |
| C  | 0.00007100  | 1.76670200  | 1.63300400  |
| H  | 0.89273800  | 2.26670600  | 2.00767600  |
| H  | -0.89239300 | 2.26685300  | 2.00796400  |
| H  | 0.00004200  | 0.74625500  | 2.12781100  |
| C  | -0.00034800 | 2.70461000  | -0.31110100 |
| H  | -0.91280100 | 3.21599600  | -0.02540800 |
| H  | 0.91190800  | 3.21639600  | -0.02549100 |



|   |             |            |             |
|---|-------------|------------|-------------|
| C | -0.00022000 | 1.89443300 | -1.47109900 |
| H | 0.91505600  | 1.85789900 | -2.05313000 |
| H | -0.91552000 | 1.85751400 | -2.05307400 |

### TS<sub>Hf-6</sub>

E(B3LYP/BS1) = -554.313000 au

H(B3LYP/BS1) = -554.038043 au

G(B3LYP/BS1) = -554.095000 au

E(B3LYP/BS2//B3LYP/BS1, solvent = dichloromethane) = -553.654000 au

E(M06/BS2//B3LYP/BS1, solvent = dichloromethane) = -553.213090 au

|    |             |             |             |
|----|-------------|-------------|-------------|
| C  | 1.67917800  | -1.62573500 | 0.79356800  |
| C  | 1.55003300  | -1.79108000 | -0.61648100 |
| C  | 2.30211000  | -0.36850700 | 1.02645300  |
| H  | 1.41939600  | -2.35770600 | 1.54787000  |
| C  | 2.05811100  | -0.62565900 | -1.24463400 |
| H  | 1.16307900  | -2.66704100 | -1.11968000 |
| C  | 2.51877900  | 0.25562400  | -0.22565000 |
| H  | 2.56785100  | 0.03659100  | 1.99491400  |
| H  | 2.11631400  | -0.45334800 | -2.31199200 |
| H  | 2.98561800  | 1.21996900  | -0.38283700 |
| C  | -2.51494100 | 0.33941700  | 0.01188000  |
| C  | -2.17104400 | -0.34416800 | -1.18768700 |
| C  | -2.23205700 | -0.52298100 | 1.10321700  |
| H  | -2.96223400 | 1.32330900  | 0.07788500  |
| C  | -1.64566500 | -1.61273400 | -0.83445000 |
| H  | -2.31317800 | 0.02191900  | -2.19578500 |
| C  | -1.67620100 | -1.72237500 | 0.58769600  |
| H  | -2.41075700 | -0.30620800 | 2.14936700  |
| H  | -1.32672200 | -2.38083400 | -1.52664600 |
| H  | -1.38210100 | -2.58858900 | 1.16640000  |
| C  | 0.00642600  | 1.69684200  | 1.62902700  |
| H  | 0.88454600  | 2.19408800  | 2.03997800  |
| H  | -0.89979400 | 2.17895700  | 1.99549200  |
| H  | 0.00587700  | 0.66717900  | 2.10973600  |
| C  | 0.08727800  | 2.67127400  | -0.30366000 |
| H  | -0.79476000 | 3.22562600  | -0.00267500 |
| H  | 1.02668800  | 3.12581500  | -0.00959600 |
| C  | 0.03796300  | 1.86573700  | -1.46766800 |
| H  | 0.94321100  | 1.80739300  | -2.06470000 |
| H  | -0.88281100 | 1.89267400  | -2.04143300 |
| Hf | -0.00194500 | 0.05230900  | 0.04088900  |

### Zr\_6\_III

E(B3LYP/BS1) = -552.014000 au

H(B3LYP/BS1) = -551.737353 au

G(B3LYP/BS1) = -551.798000 au

E(B3LYP/BS2//B3LYP/BS1, solvent = dichloromethane) = -552.739000 au

E(M06/BS2//B3LYP/BS1, solvent = dichloromethane) = -552.281219 au

|    |             |            |             |
|----|-------------|------------|-------------|
| Zr | -0.11269900 | 0.03823400 | 0.02890000  |
| C  | 0.75217200  | 2.06832200 | -1.22698300 |
| C  | -0.28026800 | 2.52820200 | -0.37340100 |
| C  | 1.82787600  | 1.61120000 | -0.40854600 |
| H  | 0.74260200  | 2.09133100 | -2.31092200 |
| C  | 0.14278000  | 2.33435800 | 0.97462000  |

|   |             |             |             |
|---|-------------|-------------|-------------|
| H | -1.22258800 | 2.95835400  | -0.68740100 |
| C | 1.45947900  | 1.79000800  | 0.94926600  |
| H | 2.77677900  | 1.23201700  | -0.76713500 |
| H | -0.41170400 | 2.61899200  | 1.86127000  |
| H | 2.07445200  | 1.57311100  | 1.81219500  |
| C | -1.70268600 | -1.95558300 | 0.08170600  |
| C | -2.14772600 | -1.06271200 | 1.08627000  |
| C | -1.86941400 | -1.31978500 | -1.18310600 |
| H | -1.32576600 | -2.95684700 | 0.24499800  |
| C | -2.57610100 | 0.13779400  | 0.45148800  |
| H | -2.15713700 | -1.25870500 | 2.15192500  |
| C | -2.41499400 | -0.02886700 | -0.95661600 |
| H | -1.65390800 | -1.76039900 | -2.14999800 |
| H | -3.00859600 | 0.99952700  | 0.94453700  |
| H | -2.68965800 | 0.69003800  | -1.71845200 |
| C | 1.66155200  | -1.89726200 | -0.21182700 |
| H | 1.23959500  | -1.23417600 | -1.07115900 |
| H | 1.19754700  | -2.86051000 | -0.44283800 |
| C | 3.17131000  | -1.94185200 | -0.47837600 |
| H | 3.38971500  | -2.21158200 | -1.51626800 |
| H | 3.62599200  | -2.69399000 | 0.17346000  |
| C | 1.22744000  | -1.37763700 | 1.14806500  |
| H | 2.04852700  | -0.92411700 | 1.70486700  |
| H | 0.72675400  | -2.12891200 | 1.75924400  |
| H | 3.64682600  | -0.98063000 | -0.25969600 |

### Hf\_6\_III

E(B3LYP/BS1) = -554.343000 au

H(B3LYP/BS1) = -554.066370 au

G(B3LYP/BS1) = -554.125000 au

E(B3LYP/BS2//B3LYP/BS1, solvent = dichloromethane) = -553.692000 au

E(M06/BS2//B3LYP/BS1, solvent = dichloromethane) = -553.250883 au

|   |             |             |             |
|---|-------------|-------------|-------------|
| C | -0.40143500 | 2.13228200  | 1.15685300  |
| C | 0.18810300  | 2.52326800  | -0.07738800 |
| C | -1.65849300 | 1.52662900  | 0.86864500  |
| H | 0.01116500  | 2.30584200  | 2.14337000  |
| C | -0.69428600 | 2.14399200  | -1.12596800 |
| H | 1.13366800  | 3.03642000  | -0.19629200 |
| C | -1.83964600 | 1.53531200  | -0.54302100 |
| H | -2.37121400 | 1.16374900  | 1.59964800  |
| H | -0.53565800 | 2.31352800  | -2.18508500 |
| H | -2.70788500 | 1.17717400  | -1.07824700 |
| C | 1.72144700  | -1.89059200 | 0.12813600  |
| C | 2.11686600  | -1.13101700 | -0.99901400 |
| C | 1.88785700  | -1.08193000 | 1.29162100  |
| H | 1.37246300  | -2.91498800 | 0.11073800  |
| C | 2.51310300  | 0.16017100  | -0.54367800 |
| H | 2.11339900  | -1.47132300 | -2.02729900 |
| C | 2.38948700  | 0.17933600  | 0.87868200  |
| H | 1.70499000  | -1.39254700 | 2.31407300  |
| H | 2.91167200  | 0.95777100  | -1.15857000 |
| H | 2.64957900  | 1.00557100  | 1.52791400  |
| C | -1.60013100 | -1.91650500 | 0.23469200  |
| H | -1.14294700 | -1.25000900 | 1.08157100  |
| H | -1.16350100 | -2.88538500 | 0.49246400  |

|    |             |             |             |
|----|-------------|-------------|-------------|
| C  | -3.10484200 | -1.89940600 | 0.51892000  |
| H  | -3.32374600 | -2.15064700 | 1.56152500  |
| H  | -3.59427100 | -2.64073400 | -0.12031400 |
| C  | -1.15958300 | -1.44146300 | -1.15005000 |
| H  | -1.99961800 | -1.07679200 | -1.74298500 |
| H  | -0.63798900 | -2.22211500 | -1.70627200 |
| H  | -3.54563300 | -0.92293700 | 0.29526300  |
| Hf | 0.09687300  | 0.02676300  | -0.06586200 |

### Zr\_6\_IV

E(B3LYP/BS1) = -551.604204 au

H(B3LYP/BS1) = -551.340039 au

G(B3LYP/BS1) = -551.396383 au

E(B3LYP/BS2//B3LYP/BS1, solvent = dichloromethane) = -552.266046 au

E(M06/BS2//B3LYP/BS1, solvent = dichloromethane) = -551.815648 au

|    |             |             |             |
|----|-------------|-------------|-------------|
| Zr | -0.00021100 | 0.07422100  | -0.00002300 |
| C  | 1.71545700  | -1.69512800 | 0.71420100  |
| C  | 1.71427600  | -1.69790200 | -0.71007600 |
| C  | 2.25503000  | -0.45933900 | 1.14949600  |
| H  | 1.38148000  | -2.50380600 | 1.35216600  |
| C  | 2.25296800  | -0.46375800 | -1.15108800 |
| H  | 1.37868400  | -2.50882300 | -1.34433100 |
| C  | 2.57394300  | 0.30524900  | -0.00253500 |
| H  | 2.38807500  | -0.14936600 | 2.17724400  |
| H  | 2.38418000  | -0.15758200 | -2.18022900 |
| H  | 2.98757200  | 1.30595800  | -0.00486700 |
| C  | -2.57358800 | 0.31329100  | 0.00474400  |
| C  | -2.25784000 | -0.45031700 | -1.14882800 |
| C  | -2.25468500 | -0.45888700 | 1.15173000  |
| H  | -2.98414200 | 1.31526500  | 0.00901800  |
| C  | -1.72215600 | -1.68866100 | -0.71602900 |
| H  | -2.39063100 | -0.13815200 | -2.17594200 |
| C  | -1.72028700 | -1.69397000 | 0.70822500  |
| H  | -2.38403000 | -0.15391700 | 2.18147800  |
| H  | -1.39075600 | -2.49714900 | -1.35557500 |
| H  | -1.38734600 | -2.50728400 | 1.34079900  |
| C  | 0.00300500  | 1.83789800  | 1.35621100  |
| H  | 0.88927600  | 2.05764100  | 1.95429000  |
| C  | 0.00291700  | 1.83801400  | -1.35615300 |
| H  | 0.88936800  | 2.05751000  | -1.95411000 |
| C  | 0.00932300  | 2.67267200  | 0.00018100  |
| H  | -0.88580700 | 2.06287500  | -1.94878100 |
| H  | -0.88598300 | 2.06164300  | 1.94883000  |
| H  | 0.89853900  | 3.30902300  | 0.00023800  |
| H  | -0.87022300 | 3.32236000  | 0.00021100  |

### Zr\_6\_V

E(B3LYP/BS1) = -592.128363 au

H(B3LYP/BS1) = -591.812914 au

G(B3LYP/BS1) = -591.876608 au

E(B3LYP/BS2//B3LYP/BS1, solvent = dichloromethane) = -592.804207 au

E(M06/BS2//B3LYP/BS1, solvent = dichloromethane) = -592.314984 au

|    |             |             |             |
|----|-------------|-------------|-------------|
| Zr | -0.00013300 | -0.04775500 | -0.00005000 |
| C  | 1.78944100  | -1.83330100 | 0.39909300  |

|   |             |             |             |
|---|-------------|-------------|-------------|
| C | 1.48839900  | -1.88149600 | -0.99120700 |
| C | 2.44179300  | -0.60211700 | 0.66290800  |
| H | 1.58142300  | -2.61043300 | 1.12342700  |
| C | 1.95263000  | -0.67919000 | -1.58051600 |
| H | 1.00994700  | -2.70190200 | -1.51054700 |
| C | 2.53304600  | 0.11282200  | -0.55770300 |
| H | 2.79702100  | -0.26536400 | 1.62743000  |
| H | 1.86522500  | -0.40558800 | -2.62375900 |
| H | 2.95957200  | 1.09945100  | -0.68378700 |
| C | -2.53258300 | 0.11272400  | 0.55841000  |
| C | -2.44203500 | -0.60114200 | -0.66287900 |
| C | -1.95211600 | -0.68048800 | 1.58031000  |
| H | -2.95870000 | 1.09939200  | 0.68560000  |
| C | -1.78987600 | -1.83273700 | -0.40045400 |
| H | -2.79752100 | -0.26343000 | -1.62697000 |
| C | -1.48848200 | -1.88238100 | 0.98972000  |
| H | -1.86425400 | -0.40785200 | 2.62377000  |
| H | -1.58265400 | -2.60938600 | -1.12553600 |
| H | -1.01031500 | -2.70353200 | 1.50813800  |
| C | 0.30748500  | 1.44123300  | 1.72597900  |
| H | -0.67292400 | 1.93457100  | 1.82750700  |
| C | -0.30651000 | 1.44326300  | -1.72423700 |
| H | -0.45398000 | 0.91330500  | -2.67889100 |
| H | 0.67377300  | 1.93775600  | -1.82184800 |
| H | 0.45852800  | 0.90965700  | 2.67917800  |
| C | -1.38526300 | 2.52899500  | -1.56598700 |
| C | 1.38465100  | 2.52842900  | 1.56628800  |
| H | 2.40023900  | 2.11625800  | 1.60550400  |
| H | 1.29179100  | 3.06104700  | 0.61042100  |
| H | 1.32197400  | 3.29032200  | 2.35806200  |
| H | -1.32166400 | 3.29184500  | -2.35676800 |
| H | -2.40029700 | 2.11566500  | -1.60796400 |
| H | -1.29534900 | 3.06071100  | -0.60931300 |

#### Hf\_6\_IV

E(B3LYP/BS1) = -553.940072 au

H(B3LYP/BS1) = -553.675710 au

G(B3LYP/BS1) = -553.733093 au

E(B3LYP/BS2//B3LYP/BS1, solvent = dichloromethane) = -553.226081 au

E(M06/BS2//B3LYP/BS1, solvent = dichloromethane) = -552.788026 au

|   |             |             |             |
|---|-------------|-------------|-------------|
| C | 1.68132000  | -1.71063200 | 0.71346600  |
| C | 1.68071300  | -1.71240700 | -0.71072700 |
| C | 2.22589900  | -0.47724700 | 1.14912400  |
| H | 1.34496700  | -2.51821100 | 1.35111900  |
| C | 2.22482600  | -0.48008400 | -1.14991900 |
| H | 1.34378600  | -2.52158000 | -1.34605700 |
| C | 2.55012200  | 0.28680500  | -0.00147600 |
| H | 2.35558700  | -0.16671600 | 2.17705100  |
| H | 2.35356000  | -0.17202300 | -2.17872200 |
| H | 2.96326200  | 1.28749900  | -0.00291600 |
| C | -2.54990900 | 0.29353100  | 0.00270800  |
| C | -2.22828200 | -0.47043200 | -1.14866300 |
| C | -2.22613600 | -0.47518100 | 1.15036700  |
| H | -2.96019400 | 1.29540500  | 0.00517400  |
| C | -1.68674000 | -1.70561400 | -0.71428800 |

|    |             |             |             |
|----|-------------|-------------|-------------|
| H  | -2.35766100 | -0.15871200 | -2.17627200 |
| C  | -1.68557300 | -1.70860000 | 0.70990100  |
| H  | -2.35356500 | -0.16760700 | 2.17948600  |
| H  | -1.35289800 | -2.51358000 | -1.35277300 |
| H  | -1.35060800 | -2.51923000 | 1.34440600  |
| C  | 0.00226300  | 1.81178100  | 1.34471400  |
| H  | 0.88543900  | 2.03599000  | 1.94746200  |
| C  | 0.00265200  | 1.81196900  | -1.34460300 |
| H  | 0.88617800  | 2.03597900  | -1.94692200 |
| C  | 0.00789700  | 2.66368200  | 0.00011500  |
| H  | -0.88274800 | 2.04015600  | -1.94262700 |
| H  | -0.88349100 | 2.03958800  | 1.94236900  |
| H  | 0.89548300  | 3.30261500  | 0.00030800  |
| H  | -0.87130400 | 3.31413700  | 0.00001900  |
| Hf | -0.00014000 | 0.06417900  | -0.00007500 |

### Hf\_6\_V

E(B3LYP/BS1) = -594.464484 au

H(B3LYP/BS1) = -594.148864 au

G(B3LYP/BS1) = -594.213016 au

E(B3LYP/BS2//B3LYP/BS1, solvent = dichloromethane) = -593.765821 au

E(M06/BS2//B3LYP/BS1, solvent = dichloromethane) = -593.288949 au

|   |             |             |             |
|---|-------------|-------------|-------------|
| C | 1.77450600  | -1.81560000 | 0.42192500  |
| C | 1.46537200  | -1.88814600 | -0.96530500 |
| C | 2.42338100  | -0.57731700 | 0.66058700  |
| H | 1.57641800  | -2.58149100 | 1.16062400  |
| C | 1.91907600  | -0.69280500 | -1.57641800 |
| H | 0.98797300  | -2.71886200 | -1.46852000 |
| C | 2.50390500  | 0.11858400  | -0.57119000 |
| H | 2.78047500  | -0.22195900 | 1.61767700  |
| H | 1.82131000  | -0.43532600 | -2.62290500 |
| H | 2.92213900  | 1.10598800  | -0.71561000 |
| C | -2.50391900 | 0.11835100  | 0.57106900  |
| C | -2.42329600 | -0.57767600 | -0.66063000 |
| C | -1.91904300 | -0.69287400 | 1.57639900  |
| H | -2.92225700 | 1.10572900  | 0.71536700  |
| C | -1.77426800 | -1.81585200 | -0.42182500 |
| H | -2.78040300 | -0.22245600 | -1.61776800 |
| C | -1.46516500 | -1.88821700 | 0.96542100  |
| H | -1.82133600 | -0.43527500 | 2.62286200  |
| H | -1.57607500 | -2.58179900 | -1.16043700 |
| H | -0.98767800 | -2.71882300 | 1.46873400  |
| C | 0.29583400  | 1.46369100  | 1.67443900  |
| H | -0.68088100 | 1.96438500  | 1.77916900  |
| C | -0.29593700 | 1.46380400  | -1.67433900 |
| H | -0.43896700 | 0.94103500  | -2.63560700 |
| H | 0.68070300  | 1.96470700  | -1.77879600 |
| H | 0.43917600  | 0.94081900  | 2.63560400  |
| C | -1.37585400 | 2.55319500  | -1.53131700 |
| C | 1.37549700  | 2.55333100  | 1.53134700  |
| H | 2.39121200  | 2.14030800  | 1.56522600  |
| H | 1.28337000  | 3.09615400  | 0.58158800  |
| H | 1.31405400  | 3.30486300  | 2.33250500  |
| H | -1.31439300 | 3.30486700  | -2.33234100 |
| H | -2.39147200 | 2.13995500  | -1.56548900 |

|    |             |             |             |
|----|-------------|-------------|-------------|
| H  | -1.28405400 | 3.09588500  | -0.58145000 |
| Hf | 0.00000200  | -0.04338200 | -0.00002000 |

## Al\_7\_II

E(B3LYP/BS1) = -886.683824 au

H(B3LYP/BS1) = -886.289166 au

G(B3LYP/BS1) = -886.368359 au

E(B3LYP/BS2//B3LYP/BS1, solvent = dichloromethane) = -1127.468763 au

E(M06/BS2//B3LYP/BS1, solvent = dichloromethane) = -1126.732319 au

|    |             |             |             |
|----|-------------|-------------|-------------|
| C  | -1.36243800 | -2.35847900 | -0.34662500 |
| C  | 1.11473400  | -2.42390000 | -0.31861300 |
| C  | -0.14061100 | -3.03174900 | -0.31986800 |
| H  | 1.99240100  | -3.06925400 | -0.34409400 |
| H  | -0.16863400 | -4.11398900 | -0.35005100 |
| H  | -2.27231300 | -2.95658300 | -0.38920100 |
| C  | -0.72478600 | 1.02994700  | 2.24816000  |
| C  | 0.26183800  | 0.12407300  | 2.38983800  |
| N  | 1.35706500  | -1.10455600 | -0.31274500 |
| N  | -1.53158300 | -1.02873700 | -0.34579300 |
| C  | 2.73584000  | -0.67705100 | -0.26504100 |
| C  | 3.22774800  | 0.17924900  | -1.25719300 |
| C  | 3.57445900  | -1.10783500 | 0.77112700  |
| C  | 4.55696400  | 0.60223200  | -1.20904800 |
| H  | 2.58477600  | 0.48396900  | -2.07812600 |
| C  | 4.90394600  | -0.68384800 | 0.80809200  |
| H  | 3.18657200  | -1.76445400 | 1.54553300  |
| C  | 5.39625800  | 0.17318900  | -0.17798200 |
| H  | 4.93875100  | 1.25645400  | -1.98697300 |
| H  | 5.55139700  | -1.02110900 | 1.61186800  |
| H  | 6.42998600  | 0.50290700  | -0.14556400 |
| C  | -2.87785200 | -0.51521400 | -0.29914000 |
| C  | -3.77021800 | -0.95080900 | 0.69056600  |
| C  | -3.28379800 | 0.44243400  | -1.23686100 |
| C  | -5.06631000 | -0.43444300 | 0.73091000  |
| H  | -3.44830100 | -1.68080200 | 1.42869000  |
| C  | -4.57986500 | 0.95702700  | -1.18472100 |
| H  | -2.60318800 | 0.75316000  | -2.02463700 |
| C  | -5.47266000 | 0.52092800  | -0.20303500 |
| H  | -5.75487600 | -0.77611800 | 1.49783100  |
| H  | -4.89435700 | 1.68973200  | -1.92165800 |
| H  | -6.48054500 | 0.92243800  | -0.16719700 |
| H  | 1.30827000  | 0.42553000  | 2.39664500  |
| H  | 0.05309300  | -0.92360000 | 2.59617100  |
| H  | -0.49718000 | 2.08398800  | 2.10409300  |
| H  | -1.77312500 | 0.74425000  | 2.30516400  |
| C  | 0.02508900  | 2.00768700  | -0.87160400 |
| H  | -0.98402900 | 2.43714400  | -0.82395400 |
| H  | 0.27335400  | 1.92446600  | -1.94132200 |
| C  | 1.01050100  | 2.90853500  | -0.17862900 |
| C  | 0.69392000  | 3.96651200  | 0.57657300  |
| H  | 1.45900700  | 4.57563600  | 1.04881000  |
| H  | -0.33729400 | 4.28613100  | 0.71892900  |
| H  | 2.06372200  | 2.66119800  | -0.31308800 |
| Al | -0.05710900 | 0.16315700  | -0.17227200 |

## Ga\_7\_II

E(B3LYP/BS1) = -886.724246 au

H(B3LYP/BS1) = -886.329833 au

G(B3LYP/BS1) = -886.410510 au

E(B3LYP/BS2//B3LYP/BS1, solvent = dichloromethane) = -2809.879479 au

E(M06/BS2//B3LYP/BS1, solvent = dichloromethane) = -2809.084915 au

|    |             |             |             |
|----|-------------|-------------|-------------|
| C  | -1.35899200 | -2.37442300 | -0.27403800 |
| C  | 1.12420500  | -2.44011100 | -0.25054400 |
| C  | -0.13431800 | -3.04173900 | -0.22506200 |
| H  | 1.99740100  | -3.09192800 | -0.25790800 |
| H  | -0.16290600 | -4.12440900 | -0.21632200 |
| H  | -2.26508500 | -2.97928000 | -0.29586300 |
| C  | -0.73167400 | 0.97448100  | 2.35924300  |
| C  | 0.27930500  | 0.09553400  | 2.48296800  |
| N  | 1.37760500  | -1.12528200 | -0.29405200 |
| N  | -1.53935200 | -1.04846000 | -0.32195200 |
| C  | 2.75364500  | -0.69571500 | -0.26803400 |
| C  | 3.22593300  | 0.16251300  | -1.26824200 |
| C  | 3.61121300  | -1.12399800 | 0.75339900  |
| C  | 4.55444100  | 0.58886800  | -1.24390100 |
| H  | 2.56801200  | 0.46512300  | -2.07832700 |
| C  | 4.94013300  | -0.69691800 | 0.76629900  |
| H  | 3.23796100  | -1.77775400 | 1.53716900  |
| C  | 5.41313500  | 0.16114300  | -0.22819900 |
| H  | 4.92072800  | 1.24427600  | -2.02825900 |
| H  | 5.60206300  | -1.03157200 | 1.55929400  |
| H  | 6.44645100  | 0.49339800  | -0.21395300 |
| C  | -2.88360000 | -0.53428500 | -0.29635200 |
| C  | -3.79070300 | -0.96080000 | 0.68351100  |
| C  | -3.27488900 | 0.41568400  | -1.24801000 |
| C  | -5.08701500 | -0.44360300 | 0.69936500  |
| H  | -3.48008300 | -1.68216500 | 1.43467700  |
| C  | -4.57094100 | 0.93144500  | -1.22017600 |
| H  | -2.58201500 | 0.71934700  | -2.02812100 |
| C  | -5.47894500 | 0.50368600  | -0.24864700 |
| H  | -5.78682000 | -0.77763300 | 1.45944100  |
| H  | -4.87374600 | 1.65814300  | -1.96788700 |
| H  | -6.48699400 | 0.90598200  | -0.23136900 |
| H  | 1.31698700  | 0.42418100  | 2.48648000  |
| H  | 0.10025000  | -0.96165600 | 2.66635100  |
| H  | -0.53577200 | 2.03645100  | 2.23227500  |
| H  | -1.77162600 | 0.66035600  | 2.41323700  |
| C  | 0.02278300  | 2.02908600  | -0.81319000 |
| H  | -0.98950900 | 2.44138200  | -0.73326300 |
| H  | 0.26080700  | 1.97403100  | -1.88537100 |
| C  | 1.01521800  | 2.89877400  | -0.09419500 |
| C  | 0.69887100  | 3.94592500  | 0.67464500  |
| H  | 1.46412900  | 4.54412600  | 1.16028100  |
| H  | -0.33196700 | 4.26510500  | 0.81921700  |
| H  | 2.06616700  | 2.64446700  | -0.23027100 |
| Ga | -0.04996900 | 0.15461100  | -0.18498400 |

## In\_7\_II

E(B3LYP/BS1) = -886.526989 au

H(B3LYP/BS1) = -886.133298 au

G(B3LYP/BS1) = -886.216688 au

E(B3LYP/BS2//B3LYP/BS1, solvent = dichloromethane) = -1075.156432 au

E(M06/BS2//B3LYP/BS1, solvent = dichloromethane) = -1074.446516 au

|    |             |             |             |
|----|-------------|-------------|-------------|
| C  | -1.38260200 | -2.43496200 | -0.29080300 |
| C  | 1.13125200  | -2.50995700 | -0.27772300 |
| C  | -0.14401500 | -3.08254400 | -0.26790300 |
| H  | 1.97627300  | -3.19967500 | -0.27392000 |
| H  | -0.17620700 | -4.16567800 | -0.26990300 |
| H  | -2.26762500 | -3.07252800 | -0.29441000 |
| C  | -0.67902600 | 1.08560500  | 2.38296700  |
| C  | 0.31255300  | 0.19241100  | 2.55873900  |
| N  | 1.44479600  | -1.21062200 | -0.31287200 |
| N  | -1.61536100 | -1.11904400 | -0.32891300 |
| C  | 2.82854500  | -0.83317300 | -0.23582900 |
| C  | 3.33409400  | 0.10570200  | -1.14539100 |
| C  | 3.66801900  | -1.36780700 | 0.75141800  |
| C  | 4.67006100  | 0.50062200  | -1.07005700 |
| H  | 2.69534500  | 0.49186100  | -1.93636200 |
| C  | 5.00520200  | -0.97239100 | 0.81524100  |
| H  | 3.27263300  | -2.07623200 | 1.47426800  |
| C  | 5.50882400  | -0.03725700 | -0.09079200 |
| H  | 5.05822700  | 1.21705400  | -1.78780900 |
| H  | 5.64995200  | -1.39096600 | 1.58225400  |
| H  | 6.54837000  | 0.27023200  | -0.03538600 |
| C  | -2.96961000 | -0.65061800 | -0.25381600 |
| C  | -3.85409300 | -1.14816800 | 0.71421900  |
| C  | -3.39885400 | 0.34615800  | -1.14107000 |
| C  | -5.16014500 | -0.65988300 | 0.77826200  |
| H  | -3.51679200 | -1.90010700 | 1.42237900  |
| C  | -4.70379500 | 0.83337600  | -1.06522000 |
| H  | -2.72755100 | 0.70592300  | -1.91775900 |
| C  | -5.58782500 | 0.33146100  | -0.10713200 |
| H  | -5.83988600 | -1.05022400 | 1.52980400  |
| H  | -5.03261700 | 1.59521600  | -1.76556700 |
| H  | -6.60327600 | 0.71091600  | -0.05115400 |
| H  | 1.35704600  | 0.49892500  | 2.57545100  |
| H  | 0.10894400  | -0.85763800 | 2.75698400  |
| H  | -0.46235300 | 2.14240400  | 2.23909600  |
| H  | -1.72540500 | 0.78933600  | 2.42577800  |
| C  | 0.08167200  | 2.30358700  | -0.93615600 |
| H  | -0.93153800 | 2.71710700  | -0.90577600 |
| H  | 0.38442400  | 2.23751600  | -1.98837100 |
| C  | 1.04198600  | 3.13029900  | -0.13877300 |
| C  | 0.69816200  | 4.12920900  | 0.68282000  |
| H  | 1.44650700  | 4.70177500  | 1.22246500  |
| H  | -0.33811900 | 4.43582800  | 0.81473100  |
| H  | 2.09844700  | 2.88707400  | -0.25709900 |
| In | -0.04455700 | 0.26631700  | -0.24582000 |

## Sc 8 II

E(B3LYP/BS1) = -931.179234 au

H(B3LYP/BS1) = -930.786473 au

G(B3LYP/BS1) = -930.865676 au

E(B3LYP/BS2//B3LYP/BS1, solvent = dichloromethane) = -1645.766874 au

E(M06/BS2//B3LYP/BS1, solvent = dichloromethane) = -1645.019816 au



|    |             |             |             |
|----|-------------|-------------|-------------|
| C  | -1.25016200 | -2.04188400 | -1.31007200 |
| C  | 1.23389700  | -2.06368800 | -1.30891600 |
| C  | -0.01255700 | -2.57727500 | -1.67475200 |
| H  | 2.11310300  | -2.67153200 | -1.53064500 |
| H  | -0.02116100 | -3.51883500 | -2.21114300 |
| H  | -2.13800400 | -2.63677200 | -1.53248300 |
| C  | 0.05906200  | 1.48643400  | 2.33511500  |
| C  | 0.03108700  | 0.14120400  | 2.21735800  |
| N  | 1.44864600  | -0.89995700 | -0.68589800 |
| N  | -1.45237500 | -0.87542500 | -0.68459700 |
| C  | 2.73437900  | -0.63148100 | -0.13047100 |
| C  | 3.33364000  | 0.61727400  | -0.36593300 |
| C  | 3.37539900  | -1.55967100 | 0.70805400  |
| C  | 4.55722700  | 0.93273500  | 0.23093700  |
| H  | 2.88137200  | 1.30633800  | -1.07532900 |
| C  | 4.60250800  | -1.24095900 | 1.28710800  |
| H  | 2.90269000  | -2.51669900 | 0.91119100  |
| C  | 5.19364900  | 0.00571600  | 1.05666700  |
| H  | 5.02105400  | 1.89376500  | 0.02946700  |
| H  | 5.09558400  | -1.96596500 | 1.92789700  |
| H  | 6.14749200  | 0.24836500  | 1.51444500  |
| C  | -2.74367100 | -0.61008900 | -0.13125700 |
| C  | -3.34688700 | -1.51942300 | 0.75422600  |
| C  | -3.39146700 | 0.60101100  | -0.42436900 |
| C  | -4.58204300 | -1.21924400 | 1.32676600  |
| H  | -2.83902500 | -2.44924300 | 0.99569400  |
| C  | -4.62383800 | 0.89843900  | 0.16306800  |
| H  | -2.97008200 | 1.27729200  | -1.16419800 |
| C  | -5.22074700 | -0.00906500 | 1.03891300  |
| H  | -5.04416200 | -1.93039100 | 2.00505700  |
| H  | -5.12452300 | 1.82998600  | -0.08350000 |
| H  | -6.18088200 | 0.22055300  | 1.49023000  |
| H  | 0.94901500  | -0.44368400 | 2.20608900  |
| H  | -0.90564100 | -0.41068800 | 2.26717500  |
| H  | 0.99658600  | 2.03259300  | 2.39835400  |
| H  | -0.85010700 | 2.06498300  | 2.47000900  |
| C  | 0.02030000  | 1.89524500  | -2.25912200 |
| H  | -1.04276900 | 1.73151400  | -2.46309700 |
| H  | 0.66997500  | 1.70578800  | -3.10865500 |
| C  | 0.38724900  | 2.84538700  | -1.28680800 |
| C  | -0.34195500 | 3.08119800  | -0.12794100 |
| H  | 0.03134100  | 3.76954500  | 0.62169600  |
| H  | -1.42366800 | 2.92737500  | -0.11878500 |
| H  | 1.41413200  | 3.21377300  | -1.30648100 |
| Sc | 0.01206500  | 0.59802000  | -0.34480800 |

## La\_8\_II

E(B3LYP/BS1) = -915.958521 au

H(B3LYP/BS1) = -915.567409 au

G(B3LYP/BS1) = -915.651026 au

E(B3LYP/BS2//B3LYP/BS1, solvent = dichloromethane) = -916.661181 au

E(M06/BS2//B3LYP/BS1, solvent = dichloromethane) = -915.901832 au

|   |             |             |             |
|---|-------------|-------------|-------------|
| C | -1.30058100 | -2.73596000 | -0.88230400 |
| C | 1.18797600  | -2.76272100 | -0.87812500 |
| C | -0.06169100 | -3.35798500 | -1.07143000 |

|    |             |             |             |
|----|-------------|-------------|-------------|
| H  | 2.06393000  | -3.41343400 | -0.94287800 |
| H  | -0.07216900 | -4.41243100 | -1.32167100 |
| H  | -2.18974000 | -3.36920600 | -0.94294300 |
| C  | 0.15730300  | 1.81965900  | 2.68183900  |
| C  | 0.06084300  | 0.47616200  | 2.71910500  |
| N  | 1.40582000  | -1.47348700 | -0.61680400 |
| N  | -1.48833700 | -1.44223000 | -0.62862900 |
| C  | 2.66657500  | -1.01784600 | -0.17241900 |
| C  | 3.13758900  | 0.21561000  | -0.67394500 |
| C  | 3.39815500  | -1.66310700 | 0.84462100  |
| C  | 4.31544600  | 0.78401900  | -0.17122300 |
| H  | 2.65754200  | 0.66000600  | -1.54795800 |
| C  | 4.57647900  | -1.09597800 | 1.32359200  |
| H  | 3.02960700  | -2.59828600 | 1.25685700  |
| C  | 5.03470300  | 0.13171800  | 0.82801500  |
| H  | 4.68015100  | 1.71868500  | -0.58718700 |
| H  | 5.13893300  | -1.60969200 | 2.09796500  |
| H  | 5.95178000  | 0.56602400  | 1.21320900  |
| C  | -2.73505200 | -0.95481000 | -0.17996500 |
| C  | -3.46977700 | -1.57069800 | 0.85279100  |
| C  | -3.18661600 | 0.28141700  | -0.69274600 |
| C  | -4.63022600 | -0.97172300 | 1.33718700  |
| H  | -3.11663900 | -2.50807100 | 1.27341800  |
| C  | -4.34700900 | 0.88155900  | -0.18651800 |
| H  | -2.71164300 | 0.70010500  | -1.58150100 |
| C  | -5.06793300 | 0.25869300  | 0.83040000  |
| H  | -5.19464100 | -1.46302400 | 2.12457300  |
| H  | -4.69729400 | 1.81694900  | -0.61311700 |
| H  | -5.97098200 | 0.71778700  | 1.21989800  |
| H  | 0.94728500  | -0.15670200 | 2.76070300  |
| H  | -0.89947000 | -0.02298300 | 2.84605100  |
| H  | 1.12047900  | 2.32273700  | 2.65779400  |
| H  | -0.71927800 | 2.45846300  | 2.74680900  |
| C  | 0.05495900  | 2.22331500  | -2.24156000 |
| H  | -1.02289500 | 2.22395300  | -2.44383500 |
| H  | 0.65337300  | 2.08430300  | -3.13946900 |
| C  | 0.52499400  | 3.12259800  | -1.24268600 |
| C  | -0.15722600 | 3.46322800  | -0.09317900 |
| H  | 0.28969200  | 4.12174400  | 0.64365600  |
| H  | -1.24530400 | 3.37159600  | -0.04518500 |
| H  | 1.58151900  | 3.39696800  | -1.28538600 |
| La | -0.01140500 | 0.50248500  | -0.26772800 |

## Y\_8\_II

E(B3LYP/BS1) = -922.673905 au

H(B3LYP/BS1) = -922.283069 au

G(B3LYP/BS1) = -922.282125 au

E(B3LYP/BS2//B3LYP/BS1, solvent = dichloromethane) = -923.3956704 au

E(M06/BS2//B3LYP/BS1, solvent = dichloromethane) = -922.6376597 au

|   |             |             |             |
|---|-------------|-------------|-------------|
| C | -1.26417600 | -2.44494400 | -1.07717400 |
| C | 1.22124600  | -2.47021600 | -1.06710000 |
| C | -0.02606100 | -3.03904800 | -1.33830100 |
| H | 2.10043200  | -3.10693700 | -1.18995600 |
| H | -0.03521700 | -4.05794100 | -1.70739700 |
| H | -2.15347100 | -3.06682700 | -1.20348000 |

|   |             |             |             |
|---|-------------|-------------|-------------|
| C | 0.06961000  | 1.56641200  | 2.49315900  |
| C | 0.02297200  | 0.21931900  | 2.41677600  |
| N | 1.43089900  | -1.21759300 | -0.65634200 |
| N | -1.45728000 | -1.18797600 | -0.66944400 |
| C | 2.69437200  | -0.82031700 | -0.14985100 |
| C | 3.18570300  | 0.44825300  | -0.51697700 |
| C | 3.40581300  | -1.58582700 | 0.79302300  |
| C | 4.36629000  | 0.94131800  | 0.05129800  |
| H | 2.70675700  | 0.99524200  | -1.32917000 |
| C | 4.58907900  | -1.09244500 | 1.33781000  |
| H | 3.01893100  | -2.55315500 | 1.10115700  |
| C | 5.06838000  | 0.17355600  | 0.97879700  |
| H | 4.74733900  | 1.91034800  | -0.25730400 |
| H | 5.13712000  | -1.69444100 | 2.05677300  |
| H | 5.98855300  | 0.55014100  | 1.41416900  |
| C | -2.72132700 | -0.78578100 | -0.16299700 |
| C | -3.41741800 | -1.54072000 | 0.79960700  |
| C | -3.23378700 | 0.46673300  | -0.55294700 |
| C | -4.60388500 | -1.05266900 | 1.34274300  |
| H | -3.01549300 | -2.49659000 | 1.12392600  |
| C | -4.41768700 | 0.95526500  | 0.01137200  |
| H | -2.76914600 | 1.00720000  | -1.37669700 |
| C | -5.10315000 | 0.19819700  | 0.96018600  |
| H | -5.13852800 | -1.64723500 | 2.07779200  |
| H | -4.81367700 | 1.91204700  | -0.31599400 |
| H | -6.02565900 | 0.57160200  | 1.39333700  |
| H | 0.93260400  | -0.38069900 | 2.42420100  |
| H | -0.92070700 | -0.32068100 | 2.48567900  |
| H | 1.01389600  | 2.10301400  | 2.53443200  |
| H | -0.83108800 | 2.16369400  | 2.60287400  |
| C | 0.05331000  | 2.05585500  | -2.26517100 |
| H | -1.01282500 | 1.96090100  | -2.49882400 |
| H | 0.69729800  | 1.92601800  | -3.13103600 |
| C | 0.43102300  | 2.96844000  | -1.25045300 |
| C | -0.30002200 | 3.21612800  | -0.09819400 |
| H | 0.07937600  | 3.89584600  | 0.65665700  |
| H | -1.38404900 | 3.07382600  | -0.09476700 |
| H | 1.46639200  | 3.31554000  | -1.25658200 |
| Y | 0.00702900  | 0.52597500  | -0.31956200 |

**TS<sub>Al-7</sub>**

E(B3LYP/BS1) = -886.636160 au

H(B3LYP/BS1) = -886.242976 au

G(B3LYP/BS1) = -886.319403 au

E(B3LYP/BS2//B3LYP/BS1, solvent = dichloromethane) = -1127.423532 au

E(M06/BS2//B3LYP/BS1, solvent = dichloromethane) = -1126.689799 au

|   |             |             |             |
|---|-------------|-------------|-------------|
| C | -1.14209700 | -2.34373600 | -0.74889300 |
| C | 1.33963500  | -2.27066200 | -0.77433000 |
| C | 0.11190000  | -2.86406800 | -1.07356600 |
| H | 2.24471500  | -2.78533900 | -1.09639800 |
| H | 0.13483100  | -3.81156000 | -1.59738200 |
| H | -2.02306500 | -2.90596300 | -1.05835700 |
| C | -0.15035900 | 2.00415000  | 1.29703400  |
| C | 0.02878300  | 0.89318000  | 2.20342900  |
| C | 0.08443500  | 1.63079700  | -0.90739400 |

|    |             |             |             |
|----|-------------|-------------|-------------|
| H  | 1.15143400  | 1.84722100  | -1.01759100 |
| H  | -0.15936300 | 0.77740200  | -1.57179400 |
| H  | -1.14551400 | 2.40402900  | 1.12619900  |
| H  | 0.64392500  | 2.72406900  | 1.12595000  |
| N  | 1.52863800  | -1.11856800 | -0.11523100 |
| N  | -1.37957400 | -1.20747600 | -0.07900800 |
| C  | -2.74660300 | -0.76864000 | 0.06312000  |
| C  | -3.52503000 | -0.51490300 | -1.07389800 |
| C  | -3.28515400 | -0.57656700 | 1.34135200  |
| C  | -4.84131000 | -0.07403000 | -0.92714600 |
| H  | -3.09817700 | -0.65413600 | -2.06349700 |
| C  | -4.60070100 | -0.13025300 | 1.47778400  |
| H  | -2.69308100 | -0.81821600 | 2.21929200  |
| C  | -5.37961100 | 0.12281000  | 0.34632300  |
| H  | -5.44300900 | 0.11871600  | -1.81025700 |
| H  | -5.02036500 | 0.00430800  | 2.47017400  |
| H  | -6.40312700 | 0.46729600  | 0.45681500  |
| C  | 2.87861000  | -0.62410300 | 0.01877300  |
| C  | 3.63779700  | -0.33585300 | -1.12241900 |
| C  | 3.41908900  | -0.42103400 | 1.29424000  |
| C  | 4.93871200  | 0.15042600  | -0.98270200 |
| H  | 3.20724500  | -0.48200200 | -2.10930900 |
| C  | 4.71892500  | 0.07107900  | 1.42355100  |
| H  | 2.84159900  | -0.68668800 | 2.17494800  |
| C  | 5.47966300  | 0.35807200  | 0.28783100  |
| H  | 5.52575100  | 0.37115100  | -1.86910100 |
| H  | 5.14100700  | 0.21508300  | 2.41358900  |
| H  | 6.49109600  | 0.73817600  | 0.39279100  |
| H  | -0.83855100 | 0.63163100  | 2.80827400  |
| H  | 0.97861000  | 0.85305300  | 2.73461700  |
| Al | 0.04911400  | -0.08006000 | 0.44595800  |
| C  | -0.78132900 | 2.77027500  | -1.29958000 |
| H  | -1.83637600 | 2.53960100  | -1.44665500 |
| C  | -0.35709600 | 4.03014400  | -1.45315800 |
| H  | -1.04017200 | 4.82788200  | -1.72776900 |
| H  | 0.68909300  | 4.30487300  | -1.33442800 |

**TS<sub>Al-7a</sub>**

E(B3LYP/BS1) = -886.676961 au

H(B3LYP/BS1) = -886.283549 au

G(B3LYP/BS1) = -886.358583 au

E(B3LYP/BS2//B3LYP/BS1, solvent = dichloromethane) = -1127.460388 au

E(M06/BS2//B3LYP/BS1, solvent = dichloromethane) = -1126.724517 au

|    |             |             |             |
|----|-------------|-------------|-------------|
| C  | 1.28516800  | -2.48916000 | -0.05184500 |
| C  | -1.18550200 | -2.50418300 | -0.21797800 |
| C  | 0.05813500  | -3.13523500 | -0.19932000 |
| H  | -2.07162100 | -3.13277700 | -0.30511600 |
| H  | 0.07085600  | -4.21420400 | -0.29182300 |
| H  | 2.18570000  | -3.10316800 | -0.04782800 |
| C  | 0.26144800  | 2.57780100  | -1.73742100 |
| C  | 0.41079900  | 1.19582400  | -1.79108700 |
| Al | 0.02273300  | 0.08705400  | 0.04117800  |
| C  | -0.33323400 | 1.46028500  | 1.48396800  |
| H  | -1.41211300 | 1.33978300  | 1.64582200  |
| H  | 0.19646900  | 1.13389400  | 2.38494400  |

|   |             |             |             |
|---|-------------|-------------|-------------|
| H | 1.10890700  | 3.22437900  | -1.54217700 |
| H | -0.62539500 | 3.06592600  | -2.12646400 |
| N | -1.40413000 | -1.18399700 | -0.14513000 |
| N | 1.46888500  | -1.17152500 | 0.10490300  |
| C | 2.82101400  | -0.67958600 | 0.15477200  |
| C | 3.21968000  | 0.14727400  | 1.21326800  |
| C | 3.72930900  | -0.99398800 | -0.86615100 |
| C | 4.52165500  | 0.64883800  | 1.25096700  |
| H | 2.52891400  | 0.35834800  | 2.02450900  |
| C | 5.03107100  | -0.49306100 | -0.81655600 |
| H | 3.41290700  | -1.61699000 | -1.69843200 |
| C | 5.42950500  | 0.33039800  | 0.23848000  |
| H | 4.83004000  | 1.27551300  | 2.08251500  |
| H | 5.73066900  | -0.74278700 | -1.60861300 |
| H | 6.44233200  | 0.71955000  | 0.27306600  |
| C | -2.77061400 | -0.73669800 | -0.06170600 |
| C | -3.62631400 | -1.25461800 | 0.91990700  |
| C | -3.23894700 | 0.24405100  | -0.94546200 |
| C | -4.94359600 | -0.80221400 | 1.00325200  |
| H | -3.25420200 | -1.99177400 | 1.62585400  |
| C | -4.55626000 | 0.69617200  | -0.85112100 |
| H | -2.59182100 | 0.61901500  | -1.73343800 |
| C | -5.41143800 | 0.17441100  | 0.12156700  |
| H | -5.60066800 | -1.20833100 | 1.76639600  |
| H | -4.91773000 | 1.44469500  | -1.55003700 |
| H | -6.43603900 | 0.52607600  | 0.19141200  |
| H | 1.44164400  | 0.83407100  | -1.84540100 |
| H | -0.29632200 | 0.65102000  | -2.42077800 |
| C | 0.01577200  | 2.82134900  | 1.08032800  |
| C | -0.76146400 | 3.62669900  | 0.31249700  |
| H | -1.78771700 | 3.35557200  | 0.07394700  |
| H | -0.45357200 | 4.63705300  | 0.06133200  |
| H | 1.01283800  | 3.17592200  | 1.34441400  |

**TS<sub>Ga-7</sub>**

E(B3LYP/BS1) = -886.664687 au

H(B3LYP/BS1) = -886.271819 au

G(B3LYP/BS1) = -886.349139 au

E(B3LYP/BS2//B3LYP/BS1, solvent = dichloromethane) = -2809.816183 au

E(M06/BS2//B3LYP/BS1, solvent = dichloromethane) = -2809.024876 au

|   |             |             |             |
|---|-------------|-------------|-------------|
| C | -1.39630500 | -2.19816300 | -0.81824800 |
| C | 1.09139800  | -2.30525600 | -0.75413000 |
| C | -0.16789300 | -2.79986700 | -1.09928800 |
| H | 1.96271100  | -2.88612800 | -1.05590000 |
| H | -0.19483200 | -3.74333900 | -1.63021800 |
| H | -2.29795300 | -2.70453600 | -1.16207900 |
| C | 0.01041300  | 2.08075000  | 1.21166400  |
| C | -0.08892300 | 0.99577700  | 2.16692500  |
| C | -0.10456900 | 1.63709800  | -1.06611900 |
| H | 0.42589800  | 0.88378700  | -1.66786900 |
| H | -1.17794400 | 1.58720000  | -1.27592800 |
| H | -0.85124900 | 2.71166600  | 1.01613700  |
| H | 0.97082800  | 2.54507600  | 1.00988400  |
| N | 1.35326700  | -1.18254200 | -0.07342800 |
| N | -1.59501300 | -1.05468300 | -0.15169600 |

|    |             |             |             |
|----|-------------|-------------|-------------|
| C  | -2.93734500 | -0.54397100 | -0.03780300 |
| C  | -3.69089000 | -0.28121900 | -1.18907500 |
| C  | -3.48024400 | -0.30044200 | 1.22973200  |
| C  | -4.98864000 | 0.21845700  | -1.06698500 |
| H  | -3.25824700 | -0.45649000 | -2.17027600 |
| C  | -4.77626800 | 0.20490400  | 1.34114900  |
| H  | -2.90785400 | -0.54665500 | 2.11942500  |
| C  | -5.53175600 | 0.46558300  | 0.19530500  |
| H  | -5.57077900 | 0.41980700  | -1.96117400 |
| H  | -5.20026900 | 0.37973800  | 2.32539500  |
| H  | -6.54038600 | 0.85649700  | 0.28646500  |
| C  | 2.72508200  | -0.77621200 | 0.08865200  |
| C  | 3.54730900  | -0.60934600 | -1.03361700 |
| C  | 3.23094000  | -0.53615200 | 1.37207900  |
| C  | 4.87379700  | -0.20805300 | -0.86646400 |
| H  | 3.14684300  | -0.78369000 | -2.02867200 |
| C  | 4.55644200  | -0.12884200 | 1.52850800  |
| H  | 2.60483700  | -0.71264200 | 2.24188900  |
| C  | 5.37918800  | 0.03699500  | 0.41190000  |
| H  | 5.50897900  | -0.08266500 | -1.73820600 |
| H  | 4.94965500  | 0.04301900  | 2.52595400  |
| H  | 6.41048000  | 0.35148300  | 0.53817800  |
| H  | -1.02266900 | 0.91936900  | 2.72044200  |
| H  | 0.80663400  | 0.79681600  | 2.75259900  |
| Ga | -0.08959500 | -0.03451800 | 0.43696600  |
| C  | 0.46612800  | 2.97469600  | -1.35667000 |
| H  | -0.17623600 | 3.82872000  | -1.14255100 |
| C  | 1.69170400  | 3.19633400  | -1.84880600 |
| H  | 2.04995700  | 4.20290900  | -2.04042800 |
| H  | 2.37386500  | 2.38225600  | -2.08539500 |

**TS<sub>Ga-7a</sub>**

E(B3LYP/BS1) = -886.715075 au

H(B3LYP/BS1) = -886.321796 au

G(B3LYP/BS1) = -886.397925 au

E(B3LYP/BS2//B3LYP/BS1, solvent = dichloromethane) = -2809.868113 au

E(M06/BS2//B3LYP/BS1, solvent = dichloromethane) = -2809.074171 au

|   |             |             |             |
|---|-------------|-------------|-------------|
| C | -1.25871600 | -2.50438700 | 0.07442300  |
| C | 1.21856900  | -2.50200800 | 0.24486000  |
| C | -0.02446100 | -3.13522300 | 0.23179800  |
| H | 2.10310900  | -3.13117300 | 0.34359000  |
| H | -0.03062200 | -4.21309000 | 0.33760300  |
| H | -2.15015100 | -3.13167000 | 0.07206600  |
| C | -0.33290800 | 2.61644700  | 1.71986700  |
| C | -0.41751300 | 1.22504200  | 1.79885000  |
| C | 0.34126000  | 1.47767800  | -1.48375100 |
| H | 1.42743600  | 1.39663400  | -1.60326300 |
| H | -0.15589800 | 1.10795400  | -2.38510600 |
| H | -1.21724300 | 3.21488500  | 1.53417500  |
| H | 0.51891400  | 3.14930400  | 2.12807000  |
| N | 1.44294100  | -1.18561100 | 0.15449300  |
| N | -1.46416000 | -1.19334700 | -0.09445300 |
| C | -2.81892500 | -0.71655200 | -0.15173100 |
| C | -3.21733200 | 0.11406200  | -1.20755100 |
| C | -3.73373000 | -1.05007000 | 0.85716000  |

|    |             |             |             |
|----|-------------|-------------|-------------|
| C  | -4.52475900 | 0.59930200  | -1.25538000 |
| H  | -2.52046500 | 0.34045900  | -2.00960600 |
| C  | -5.04115200 | -0.56487000 | 0.79779900  |
| H  | -3.41803400 | -1.67439100 | 1.68861700  |
| C  | -5.43922100 | 0.26146800  | -0.25486900 |
| H  | -4.83257900 | 1.22843000  | -2.08532800 |
| H  | -5.74535400 | -0.82889000 | 1.58109900  |
| H  | -6.45643500 | 0.63823100  | -0.29703100 |
| C  | 2.80515900  | -0.73621000 | 0.06224700  |
| C  | 3.67726600  | -1.30146500 | -0.87838100 |
| C  | 3.25743900  | 0.29384800  | 0.89741800  |
| C  | 4.99395700  | -0.84839900 | -0.96670200 |
| H  | 3.31846100  | -2.07517700 | -1.55120000 |
| C  | 4.57398200  | 0.74600700  | 0.79788400  |
| H  | 2.59625500  | 0.70971500  | 1.65253900  |
| C  | 5.44576900  | 0.17585400  | -0.13213900 |
| H  | 5.66300000  | -1.29128700 | -1.69836000 |
| H  | 4.92201100  | 1.53354300  | 1.45980100  |
| H  | 6.46996200  | 0.52783400  | -0.20616000 |
| H  | -1.43158100 | 0.82474200  | 1.87864900  |
| H  | 0.31415900  | 0.73066900  | 2.44075600  |
| C  | -0.08805500 | 2.81128300  | -1.08806400 |
| C  | 0.62738100  | 3.64233000  | -0.28400700 |
| H  | 1.66164900  | 3.42034500  | -0.03090100 |
| H  | 0.27174600  | 4.63975500  | -0.04516000 |
| H  | -1.09416100 | 3.11730000  | -1.37607800 |
| Ga | -0.01063600 | 0.09012200  | -0.02991700 |

### TS<sub>In-7</sub>

E(B3LYP/BS1) = -886.4617281 au

H(B3LYP/BS1) = -886.069859 au

G(B3LYP/BS1) = -886.150053 au

E(B3LYP/BS2//B3LYP/BS1, solvent = dichloromethane) = -1075.084103 au

E(M06/BS2//B3LYP/BS1, solvent = dichloromethane) = -1074.376176 au

|   |             |             |             |
|---|-------------|-------------|-------------|
| C | -1.20111000 | -2.40018300 | -0.70389900 |
| C | 1.32074800  | -2.35498300 | -0.72365500 |
| C | 0.06724800  | -2.91909100 | -0.98341700 |
| H | 2.19046700  | -2.93415200 | -1.03599400 |
| H | 0.08108300  | -3.89270200 | -1.45874000 |
| H | -2.05472100 | -3.00909800 | -1.00387300 |
| C | -0.08009400 | 2.39196800  | 1.00967200  |
| C | 0.02064900  | 1.45773900  | 2.11776800  |
| C | 0.13381100  | 1.77981100  | -1.24834800 |
| H | 1.21117700  | 1.94069500  | -1.33526800 |
| H | -0.14622200 | 0.88486300  | -1.82839000 |
| H | -1.04446900 | 2.81563400  | 0.74977800  |
| H | 0.76469400  | 3.01416300  | 0.73312300  |
| N | 1.59267900  | -1.19208100 | -0.12229000 |
| N | -1.50358100 | -1.24755400 | -0.09684400 |
| C | -2.87886600 | -0.84890200 | 0.00528300  |
| C | -3.72038100 | -0.87923800 | -1.11512000 |
| C | -3.37253600 | -0.39945800 | 1.23737100  |
| C | -5.05074900 | -0.47548800 | -0.99342700 |
| H | -3.33018700 | -1.19653200 | -2.07808800 |
| C | -4.70180600 | 0.00933100  | 1.34777600  |

|    |             |             |             |
|----|-------------|-------------|-------------|
| H  | -2.73168900 | -0.41680700 | 2.11595600  |
| C  | -5.54409800 | -0.02873400 | 0.23403100  |
| H  | -5.69808400 | -0.50087200 | -1.86490000 |
| H  | -5.08229300 | 0.34224700  | 2.30877700  |
| H  | -6.57852500 | 0.28814500  | 0.32267000  |
| C  | 2.95691100  | -0.75184800 | -0.03495000 |
| C  | 3.78127400  | -0.74346200 | -1.16820400 |
| C  | 3.45554600  | -0.30394500 | 1.19555600  |
| C  | 5.10101900  | -0.30225800 | -1.06123900 |
| H  | 3.38511800  | -1.05964200 | -2.12906800 |
| C  | 4.77394000  | 0.14216400  | 1.29123100  |
| H  | 2.82823300  | -0.34939100 | 2.08273800  |
| C  | 5.59978100  | 0.14300700  | 0.16452900  |
| H  | 5.73521700  | -0.29712200 | -1.94265100 |
| H  | 5.15926500  | 0.47408500  | 2.25065400  |
| H  | 6.62572300  | 0.48912000  | 0.24186200  |
| H  | -0.87167200 | 1.35237900  | 2.73347400  |
| H  | 0.95520300  | 1.46408500  | 2.67636000  |
| In | 0.02700600  | 0.03643100  | 0.47472200  |
| C  | -0.68311500 | 2.92466200  | -1.68635200 |
| H  | -1.73317500 | 2.71533900  | -1.89104900 |
| C  | -0.23373500 | 4.18201700  | -1.81692200 |
| H  | -0.88821000 | 4.98801100  | -2.13368600 |
| H  | 0.80946500  | 4.44121100  | -1.64723200 |

**TS<sub>In-7a</sub>**

E(B3LYP/BS1) = -886.516791 au

H(B3LYP/BS1) = -886.124134 au

G(B3LYP/BS1) = -886.202128 au

E(B3LYP/BS2//B3LYP/BS1, solvent = dichloromethane) = -1075.142695 au

E(M06/BS2//B3LYP/BS1, solvent = dichloromethane) = -1074.43278 au

|   |             |             |             |
|---|-------------|-------------|-------------|
| C | -1.22906600 | -2.58712100 | 0.05711400  |
| C | 1.27887200  | -2.56202500 | 0.21896900  |
| C | 0.02714100  | -3.18320000 | 0.19595900  |
| H | 2.14541900  | -3.21750100 | 0.31718800  |
| H | 0.03203800  | -4.26278800 | 0.28928000  |
| H | -2.09017600 | -3.25708400 | 0.05887700  |
| C | -0.52168700 | 2.86249600  | 1.68301700  |
| C | -0.49892800 | 1.47191900  | 1.84098100  |
| C | 0.40439700  | 1.75447700  | -1.58935600 |
| H | 1.49827300  | 1.73604100  | -1.61364900 |
| H | -0.01299700 | 1.36010300  | -2.51865100 |
| H | -1.45375900 | 3.36891800  | 1.45964100  |
| H | 0.25129500  | 3.47749700  | 2.13011900  |
| N | 1.54432600  | -1.25396500 | 0.14817600  |
| N | -1.50257500 | -1.28828000 | -0.09684500 |
| C | -2.87376000 | -0.87359500 | -0.13442400 |
| C | -3.29590400 | 0.01299100  | -1.13557400 |
| C | -3.78786400 | -1.30809200 | 0.83675800  |
| C | -4.62014500 | 0.45100400  | -1.16970100 |
| H | -2.60079900 | 0.31728200  | -1.91502200 |
| C | -5.11224000 | -0.87014600 | 0.79140000  |
| H | -3.45747700 | -1.96970300 | 1.63263800  |
| C | -5.53209500 | 0.01025600  | -0.20777800 |
| H | -4.94253400 | 1.12338500  | -1.95929400 |



|    |             |             |             |
|----|-------------|-------------|-------------|
| H  | -5.81354600 | -1.21207600 | 1.54676400  |
| H  | -6.56268700 | 0.34992600  | -0.23758800 |
| C  | 2.91325000  | -0.83565800 | 0.08096200  |
| C  | 3.81570400  | -1.45105100 | -0.79881300 |
| C  | 3.34709400  | 0.23146000  | 0.88034400  |
| C  | 5.13845100  | -1.01172200 | -0.85959800 |
| H  | 3.47587700  | -2.25145500 | -1.44974600 |
| C  | 4.66977000  | 0.66991100  | 0.80835200  |
| H  | 2.66303300  | 0.68551000  | 1.59403700  |
| C  | 5.56988000  | 0.04862600  | -0.05982500 |
| H  | 5.82930000  | -1.49346600 | -1.54509300 |
| H  | 4.99975900  | 1.48684100  | 1.44335400  |
| H  | 6.59909500  | 0.38935000  | -0.11382900 |
| H  | -1.47854600 | 0.99412000  | 1.92949200  |
| H  | 0.25859800  | 1.07067700  | 2.51670700  |
| C  | -0.16121000 | 3.01144300  | -1.15924800 |
| C  | 0.41373300  | 3.85190100  | -0.24841800 |
| H  | 1.44850800  | 3.71218000  | 0.05571000  |
| H  | -0.02607300 | 4.81974900  | -0.03041800 |
| H  | -1.16648900 | 3.24952200  | -1.50839500 |
| In | 0.00896500  | 0.18684600  | -0.05363600 |

### TS<sub>La-8</sub>

E(B3LYP/BS1) = -915.907267 au

H(B3LYP/BS1) = -915.517794 au

G(B3LYP/BS1) = -915.599578 au

E(B3LYP/BS2//B3LYP/BS1, solvent = dichloromethane) = -916.624268 au

E(M06/BS2//B3LYP/BS1, solvent = dichloromethane) = -915.862559 au

|   |             |             |             |
|---|-------------|-------------|-------------|
| C | 1.38054000  | -3.03559100 | -0.35279000 |
| C | -1.10790800 | -3.13634200 | -0.35868800 |
| C | 0.16295900  | -3.71730100 | -0.43569900 |
| H | -1.96300600 | -3.81577600 | -0.30759500 |
| H | 0.20726400  | -4.79864900 | -0.49401300 |
| H | 2.28757300  | -3.64334400 | -0.29797700 |
| C | 0.00287400  | 2.84903700  | -1.56253500 |
| C | -0.01317100 | 1.72896600  | -2.40603000 |
| C | -0.05727600 | 2.61972800  | 0.77349200  |
| H | -1.05039100 | 2.24713700  | 1.09442400  |
| H | 0.74637900  | 2.06793300  | 1.31197000  |
| H | 0.92021800  | 3.41112400  | -1.42202400 |
| H | -0.89928300 | 3.42394100  | -1.38259500 |
| N | -1.36284600 | -1.82928400 | -0.33666700 |
| N | 1.53253800  | -1.71070800 | -0.32836300 |
| C | 2.75828400  | -1.11748200 | 0.04544200  |
| C | 3.49909800  | -1.53391500 | 1.16938300  |
| C | 3.17364700  | 0.03803400  | -0.65388700 |
| C | 4.63212300  | -0.82474700 | 1.56037100  |
| H | 3.17043600  | -2.40161300 | 1.73427900  |
| C | 4.30608000  | 0.75213800  | -0.24067300 |
| H | 2.69456600  | 0.29594800  | -1.60014400 |
| C | 5.03473200  | 0.32398500  | 0.86708700  |
| H | 5.20103300  | -1.16282200 | 2.42163300  |
| H | 4.62913100  | 1.62085400  | -0.80681600 |
| H | 5.91585000  | 0.87148300  | 1.18610000  |
| C | -2.63511400 | -1.33063200 | 0.01793100  |

|    |             |             |             |
|----|-------------|-------------|-------------|
| C  | -3.35682600 | -1.79584500 | 1.13482500  |
| C  | -3.12789100 | -0.21415700 | -0.69455800 |
| C  | -4.54498600 | -1.17172200 | 1.50735500  |
| H  | -2.97076600 | -2.63293600 | 1.70951800  |
| C  | -4.31658300 | 0.41421400  | -0.30085500 |
| H  | -2.65807800 | 0.07220300  | -1.63741700 |
| C  | -5.02448400 | -0.06100600 | 0.80138900  |
| H  | -5.09752200 | -1.54666000 | 2.36400900  |
| H  | -4.69772000 | 1.25200900  | -0.87742800 |
| H  | -5.94840400 | 0.42016100  | 1.10594100  |
| H  | 0.89136800  | 1.46771700  | -2.95765200 |
| H  | -0.94378700 | 1.46481900  | -2.91165600 |
| La | 0.01282600  | 0.22072200  | -0.27574500 |
| C  | 0.07107300  | 4.05863800  | 1.03665700  |
| H  | 1.08915700  | 4.44832400  | 1.05721200  |
| C  | -0.94977400 | 4.91645200  | 1.18623200  |
| H  | -0.78137900 | 5.97908800  | 1.32864600  |
| H  | -1.98592300 | 4.58312100  | 1.18755900  |

**TS<sub>La-8a</sub>**

E(B3LYP/BS1) = -915.937632 au

H(B3LYP/BS1) = -915.546732 au

G(B3LYP/BS1) = -915.625353 au

E(B3LYP/BS2//B3LYP/BS1, solvent = dichloromethane) = -916.635252 au

E(M06/BS2//B3LYP/BS1, solvent = dichloromethane) = -915.877242 au

|   |             |             |             |
|---|-------------|-------------|-------------|
| C | 1.37763700  | -2.82507000 | -0.66968400 |
| C | -1.10884000 | -2.89209200 | -0.66923700 |
| C | 0.15031400  | -3.48049300 | -0.81484800 |
| H | -1.97483800 | -3.55864600 | -0.69512100 |
| H | 0.17819800  | -4.54968800 | -0.98953700 |
| H | 2.27842100  | -3.44448900 | -0.68578800 |
| C | -0.23887500 | 3.19800600  | -1.42560000 |
| C | -0.03364800 | 2.02418000  | -2.22032600 |
| C | -0.25282800 | 1.43531500  | 2.35018100  |
| H | -1.27024400 | 1.03691100  | 2.37424500  |
| H | 0.41809100  | 1.07197800  | 3.12326300  |
| H | 0.62077600  | 3.84316500  | -1.26224800 |
| H | -1.15813400 | 3.75307400  | -1.59039900 |
| N | -1.34963100 | -1.59198400 | -0.49759700 |
| N | 1.54073900  | -1.51368400 | -0.50933500 |
| C | 2.77871500  | -0.97214400 | -0.09982800 |
| C | 3.53066600  | -1.50324500 | 0.96658900  |
| C | 3.20158600  | 0.23709700  | -0.69503800 |
| C | 4.68056500  | -0.85025900 | 1.40362200  |
| H | 3.19693900  | -2.41556100 | 1.45270400  |
| C | 4.35109800  | 0.89312600  | -0.23588100 |
| H | 2.71057100  | 0.58808000  | -1.60395000 |
| C | 5.09013300  | 0.35283300  | 0.81482000  |
| H | 5.25778200  | -1.27639600 | 2.21913800  |
| H | 4.68003400  | 1.80570000  | -0.72458100 |
| H | 5.98508800  | 0.85503400  | 1.16821500  |
| C | -2.62751300 | -1.13261700 | -0.10458500 |
| C | -3.34534400 | -1.70218600 | 0.96542600  |
| C | -3.13463100 | 0.03030800  | -0.72350900 |
| C | -4.54425600 | -1.13051900 | 1.38483900  |

|    |             |             |             |
|----|-------------|-------------|-------------|
| H  | -2.94810200 | -2.58008500 | 1.46704300  |
| C  | -4.33366600 | 0.60494800  | -0.28294800 |
| H  | -2.65612300 | 0.41056900  | -1.62714100 |
| C  | -5.03830600 | 0.02810500  | 0.77222100  |
| H  | -5.09388800 | -1.58508200 | 2.20402500  |
| H  | -4.72641100 | 1.48248700  | -0.78843000 |
| H  | -5.97112100 | 0.46757400  | 1.11102400  |
| H  | 0.95819600  | 1.90046700  | -2.66218600 |
| H  | -0.83987400 | 1.73131300  | -2.89490100 |
| C  | 0.03877000  | 2.57701400  | 1.64169100  |
| C  | -0.76632100 | 3.15669500  | 0.58834300  |
| H  | -1.81182900 | 2.83152500  | 0.58175600  |
| H  | -0.69576700 | 4.23964700  | 0.54685900  |
| H  | 1.01688900  | 3.03331500  | 1.81049700  |
| La | 0.03256200  | 0.41762800  | -0.23093800 |

### TS<sub>Sc-8</sub>

E(B3LYP/BS1) = -931.137434 au

H(B3LYP/BS1) = -930.746488 au

G(B3LYP/BS1) = -930.825517 au

E(B3LYP/BS2//B3LYP/BS1, solvent = dichloromethane) = -1645.730648 au

E(M06/BS2//B3LYP/BS1, solvent = dichloromethane) = -1644.978507 au

|   |             |             |             |
|---|-------------|-------------|-------------|
| C | -1.36635200 | -2.60391800 | 0.50405200  |
| C | 1.12372900  | -2.67115400 | 0.51698200  |
| C | -0.13912400 | -3.25367000 | 0.66065800  |
| H | 1.98622700  | -3.34044400 | 0.52791400  |
| H | -0.16847100 | -4.32343100 | 0.83126000  |
| H | -2.26540300 | -3.22332400 | 0.50165700  |
| C | -0.00864100 | 2.40655700  | 1.71097800  |
| C | -0.01959600 | 1.24815900  | 2.50748400  |
| C | 0.06227000  | 2.10793300  | -0.53079100 |
| H | 1.04419600  | 1.68880000  | -0.83274300 |
| H | -0.76167600 | 1.53347600  | -1.02005400 |
| H | -0.91646500 | 2.98830000  | 1.58327700  |
| H | 0.90494900  | 2.97569000  | 1.57118700  |
| N | 1.37975200  | -1.36846500 | 0.34362200  |
| N | -1.54360000 | -1.28802700 | 0.33411400  |
| C | -2.81681100 | -0.79492800 | -0.08238700 |
| C | -3.48955400 | -1.34500100 | -1.18567400 |
| C | -3.36953700 | 0.31155000  | 0.58503400  |
| C | -4.70375400 | -0.80041100 | -1.60011900 |
| H | -3.04860900 | -2.18032400 | -1.72219600 |
| C | -4.57946800 | 0.85981700  | 0.15255100  |
| H | -2.89182500 | 0.69594900  | 1.48468900  |
| C | -5.24917800 | 0.30432200  | -0.93835800 |
| H | -5.22115100 | -1.23413300 | -2.45067600 |
| H | -5.00735800 | 1.70454500  | 0.68419200  |
| H | -6.19289300 | 0.72578300  | -1.27006100 |
| C | 2.69175200  | -0.96245300 | -0.05065900 |
| C | 3.33672200  | -1.55013000 | -1.15073000 |
| C | 3.31654300  | 0.09151300  | 0.63689000  |
| C | 4.59403200  | -1.09383500 | -1.54368900 |
| H | 2.84206100  | -2.34478400 | -1.70202200 |
| C | 4.57035100  | 0.55113700  | 0.22726600  |
| H | 2.85442300  | 0.50378000  | 1.53213000  |

|    |             |             |             |
|----|-------------|-------------|-------------|
| C  | 5.21172200  | -0.04103900 | -0.86173400 |
| H  | 5.08877000  | -1.55606600 | -2.39271000 |
| H  | 5.05312700  | 1.35518700  | 0.77481100  |
| H  | 6.18908800  | 0.31170100  | -1.17578900 |
| H  | -0.93745800 | 0.96756000  | 3.02625600  |
| H  | 0.89956100  | 0.94185200  | 3.00931200  |
| Sc | -0.04436500 | 0.16615000  | 0.52649400  |
| C  | -0.03987200 | 3.52627400  | -0.90869700 |
| H  | -1.04580500 | 3.94357200  | -0.92632900 |
| C  | 1.00458300  | 4.31911000  | -1.18508500 |
| H  | 0.86815600  | 5.36862300  | -1.42551600 |
| H  | 2.02625100  | 3.94497100  | -1.19293600 |

**TS<sub>Sc-8a</sub>**

E(B3LYP/BS1) = -931.165085 au

H(B3LYP/BS1) = -930.772696 au

G(B3LYP/BS1) = -930.848153 au

E(B3LYP/BS2//B3LYP/BS1, solvent = dichloromethane) = -1645.74642 au

E(M06/BS2//B3LYP/BS1, solvent = dichloromethane) = -1645.000915 au

|   |             |             |             |
|---|-------------|-------------|-------------|
| C | 1.24146800  | -2.35581200 | -0.94414900 |
| C | -1.23755600 | -2.36648700 | -0.93182600 |
| C | 0.00262800  | -2.95256100 | -1.19115600 |
| H | -2.12599700 | -2.99007500 | -1.04861600 |
| H | 0.00525300  | -3.97743600 | -1.54276500 |
| H | 2.13241500  | -2.97486500 | -1.06625300 |
| C | 0.02903400  | 2.82519600  | -1.47879600 |
| C | 0.01027600  | 1.60364700  | -2.22701200 |
| C | -0.01933200 | 0.88561800  | 2.05782400  |
| H | -1.08112100 | 0.62960900  | 2.08815500  |
| H | 0.63423700  | 0.30206300  | 2.69874100  |
| H | 0.98043700  | 3.34478400  | -1.39641100 |
| H | -0.81327200 | 3.50060300  | -1.60157800 |
| N | -1.43572700 | -1.10556700 | -0.53339400 |
| N | 1.43563600  | -1.09357700 | -0.55082400 |
| C | 2.72266700  | -0.69137100 | -0.08714200 |
| C | 3.41637500  | -1.43469000 | 0.88292100  |
| C | 3.27138000  | 0.51598300  | -0.55326100 |
| C | 4.64345500  | -0.98033400 | 1.36197900  |
| H | 2.98105300  | -2.35281700 | 1.26714300  |
| C | 4.49521400  | 0.97168100  | -0.05477000 |
| H | 2.78214100  | 1.05793200  | -1.35979600 |
| C | 5.18380300  | 0.22509400  | 0.90141500  |
| H | 5.17619600  | -1.56497300 | 2.10618300  |
| H | 4.91926000  | 1.89637900  | -0.43509700 |
| H | 6.13813800  | 0.57476100  | 1.28255300  |
| C | -2.72420500 | -0.70588400 | -0.06916900 |
| C | -3.39217800 | -1.42190400 | 0.93889700  |
| C | -3.29736500 | 0.47423100  | -0.57423800 |
| C | -4.61896300 | -0.96657300 | 1.41887000  |
| H | -2.93859000 | -2.32021000 | 1.34822100  |
| C | -4.52090400 | 0.93069700  | -0.07544800 |
| H | -2.82415200 | 0.99064900  | -1.40670500 |
| C | -5.18360600 | 0.21205800  | 0.91990400  |
| H | -5.13240500 | -1.52954700 | 2.19271400  |
| H | -4.96476400 | 1.83348900  | -0.48463300 |

|    |             |            |             |
|----|-------------|------------|-------------|
| H  | -6.13717600 | 0.56275700 | 1.30197200  |
| H  | 0.93392400  | 1.30084500 | -2.72347500 |
| H  | -0.88403400 | 1.37803500 | -2.80917300 |
| C  | 0.41362500  | 2.04981700 | 1.47720700  |
| C  | -0.35553700 | 2.83051500 | 0.52951500  |
| H  | -1.43865900 | 2.68459300 | 0.59036700  |
| H  | -0.09979100 | 3.88550000 | 0.52229500  |
| H  | 1.46050600  | 2.32646600 | 1.60841700  |
| Sc | -0.00879200 | 0.42580600 | -0.35010100 |

### TS<sub>V-8</sub>

E(B3LYP/BS1) = -922.625590 au

H(B3LYP/BS1) = -922.235472 au

G(B3LYP/BS1) = -922.31557 au

E(B3LYP/BS2//B3LYP/BS1, solvent = dichloromethane) = -923.360389 au

E(M06/BS2//B3LYP/BS1, solvent = dichloromethane) = -922.598117 au

|   |             |             |             |
|---|-------------|-------------|-------------|
| C | -1.40288000 | -2.86834900 | 0.32450600  |
| C | 1.08168700  | -2.96301500 | 0.33534500  |
| C | -0.18585500 | -3.54986000 | 0.40966800  |
| H | 1.94131500  | -3.63493000 | 0.27734800  |
| H | -0.22689300 | -4.63162200 | 0.45962200  |
| H | -2.31215000 | -3.46991400 | 0.25339700  |
| C | 0.03664800  | 2.61168200  | 1.61063500  |
| C | 0.00973700  | 1.49197200  | 2.46169400  |
| C | 0.09405000  | 2.29921400  | -0.66741000 |
| H | 1.06515500  | 1.86312900  | -0.98264000 |
| H | -0.74526200 | 1.75494400  | -1.16465300 |
| H | -0.86090800 | 3.20446300  | 1.46475400  |
| H | 0.95801700  | 3.16007300  | 1.44296500  |
| N | 1.33393800  | -1.65234300 | 0.31446800  |
| N | -1.54847300 | -1.54109000 | 0.30952300  |
| C | -2.77504000 | -0.93976000 | -0.06888900 |
| C | -3.50664400 | -1.35221800 | -1.19824600 |
| C | -3.19914100 | 0.20006700  | 0.64503200  |
| C | -4.64323300 | -0.64668400 | -1.58541300 |
| H | -3.16795500 | -2.20943200 | -1.77299900 |
| C | -4.33234300 | 0.91253000  | 0.23493000  |
| H | -2.71325300 | 0.45898100  | 1.58644100  |
| C | -5.05478700 | 0.49101000  | -0.87987600 |
| H | -5.20645200 | -0.97793700 | -2.45292300 |
| H | -4.66197500 | 1.77428700  | 0.80770000  |
| H | -5.93835800 | 1.03655100  | -1.19560300 |
| C | 2.62007500  | -1.16515300 | -0.03664100 |
| C | 3.32325500  | -1.63289200 | -1.16190900 |
| C | 3.14680500  | -0.08766100 | 0.70349800  |
| C | 4.53204700  | -1.04131000 | -1.52155800 |
| H | 2.90779500  | -2.44217100 | -1.75555200 |
| C | 4.35330000  | 0.51061900  | 0.32267000  |
| H | 2.67018700  | 0.20922000  | 1.63796300  |
| C | 5.04664700  | 0.03562100  | -0.78964300 |
| H | 5.07160900  | -1.41433000 | -2.38713900 |
| H | 4.76014000  | 1.32474100  | 0.91519000  |
| H | 5.98647000  | 0.49272500  | -1.08266900 |
| H | -0.90748900 | 1.26787100  | 3.00820300  |
| H | 0.92584900  | 1.20790300  | 2.98181900  |

|   |             |            |             |
|---|-------------|------------|-------------|
| Y | -0.04378300 | 0.16214800 | 0.42132000  |
| C | 0.02794400  | 3.72344500 | -1.02947900 |
| H | -0.96909900 | 4.16298400 | -1.04629600 |
| C | 1.08746600  | 4.50631500 | -1.27780400 |
| H | 0.97100100  | 5.56356300 | -1.49338700 |
| H | 2.10311500  | 4.11570400 | -1.28763400 |

**TS<sub>Y-8a</sub>**

E(B3LYP/BS1) = -922.655987 au

H(B3LYP/BS1) = -922.264474 au

G(B3LYP/BS1) = -922.341651 au

E(B3LYP/BS2//B3LYP/BS1, solvent = dichloromethane) = -923.373114 au

E(M06/BS2//B3LYP/BS1, solvent = dichloromethane) = -922.616149 au

|   |             |             |             |
|---|-------------|-------------|-------------|
| C | 1.26412500  | -2.63198800 | -0.81065000 |
| C | -1.21809600 | -2.65554200 | -0.80128500 |
| C | 0.02758800  | -3.25416300 | -1.00634600 |
| H | -2.10067500 | -3.29682900 | -0.85982400 |
| H | 0.03662100  | -4.30674500 | -1.26368900 |
| H | 2.15664600  | -3.25912000 | -0.87243200 |
| C | 0.02423200  | 2.99662900  | -1.48195500 |
| C | 0.02546100  | 1.78783600  | -2.25629300 |
| C | -0.08632600 | 1.16401600  | 2.17884400  |
| H | -1.14607000 | 0.89701100  | 2.20852400  |
| H | 0.55372100  | 0.65896100  | 2.89610000  |
| H | 0.97242300  | 3.51847400  | -1.37562500 |
| H | -0.81384300 | 3.67419600  | -1.62143500 |
| N | -1.42144200 | -1.36519500 | -0.52855800 |
| N | 1.44865600  | -1.33854000 | -0.54054900 |
| C | 2.70558000  | -0.86494100 | -0.08453200 |
| C | 3.43117800  | -1.51271500 | 0.93242200  |
| C | 3.17785900  | 0.36441400  | -0.58634300 |
| C | 4.60752300  | -0.94652600 | 1.41742600  |
| H | 3.05675800  | -2.44418700 | 1.34720000  |
| C | 4.35162100  | 0.93355000  | -0.07834400 |
| H | 2.69175900  | 0.81698100  | -1.44998800 |
| C | 5.06729100  | 0.28059400  | 0.92368300  |
| H | 5.16489300  | -1.45947500 | 2.19580800  |
| H | 4.71773200  | 1.86884500  | -0.49166700 |
| H | 5.98242400  | 0.71545300  | 1.31298800  |
| C | -2.68313100 | -0.90215900 | -0.07754900 |
| C | -3.39963500 | -1.54103200 | 0.95156700  |
| C | -3.16726900 | 0.31548400  | -0.59726800 |
| C | -4.57900700 | -0.97678700 | 1.43196300  |
| H | -3.01628000 | -2.46367200 | 1.37786400  |
| C | -4.34463800 | 0.88222300  | -0.09433300 |
| H | -2.68500800 | 0.75856100  | -1.46880300 |
| C | -5.05070300 | 0.23878000  | 0.92072300  |
| H | -5.12942900 | -1.48182700 | 2.22037200  |
| H | -4.72060400 | 1.80778800  | -0.52049400 |
| H | -5.96776700 | 0.67214300  | 1.30706300  |
| H | 0.96033300  | 1.52327500  | -2.75509500 |
| H | -0.85239800 | 1.59165800  | -2.87387300 |
| C | 0.33648500  | 2.29856900  | 1.52899400  |
| C | -0.41632700 | 3.01959600  | 0.52288100  |
| H | -1.49674000 | 2.84463600  | 0.55408500  |

|   |             |            |             |
|---|-------------|------------|-------------|
| H | -0.19368400 | 4.08225000 | 0.50195500  |
| H | 1.37143100  | 2.61000700 | 1.68194700  |
| Y | -0.00450300 | 0.40058300 | -0.31202300 |

### Al\_1\_IV'

E(B3LYP/BS1) = -928.052998 au

H(B3LYP/BS1) = -927.593738 au

G(B3LYP/BS1) = -927.675302 au

E(B3LYP/BS2//B3LYP/BS1, solvent = dichloromethane) = -1168.807049 au

|   |             |             |             |
|---|-------------|-------------|-------------|
| C | -1.05883700 | -2.43600200 | -0.95073400 |
| C | 1.42396000  | -2.36755600 | -0.89545300 |
| C | 0.20443700  | -2.98221500 | -1.19092300 |
| H | 2.32508400  | -2.96800100 | -1.03697500 |
| H | 0.24059300  | -3.99066900 | -1.58608700 |
| H | -1.91879100 | -3.08273800 | -1.13759100 |
| N | 1.60057800  | -1.12509900 | -0.45319400 |
| N | -1.32553600 | -1.20547300 | -0.51882700 |
| C | 2.90756100  | -0.75912300 | -0.01825100 |
| C | 3.41811100  | 0.50898600  | -0.33634900 |
| C | 3.69126300  | -1.63211200 | 0.75476000  |
| C | 4.69034300  | 0.88394300  | 0.09274900  |
| H | 2.82648300  | 1.18917100  | -0.94011000 |
| C | 4.96671300  | -1.25324700 | 1.17290600  |
| H | 3.28491800  | -2.59381300 | 1.05436200  |
| C | 5.47374700  | 0.00503300  | 0.84404000  |
| H | 5.07215200  | 1.86700600  | -0.16917800 |
| H | 5.55747800  | -1.93999300 | 1.77337200  |
| H | 6.46424700  | 0.30122400  | 1.17733700  |
| C | -2.68184500 | -0.90449500 | -0.19715200 |
| C | -3.46243500 | -1.78916600 | 0.56478400  |
| C | -3.24909600 | 0.30415700  | -0.62989200 |
| C | -4.78791500 | -1.47817600 | 0.86767000  |
| H | -3.01679700 | -2.70469400 | 0.94314100  |
| C | -4.57267600 | 0.61145800  | -0.31632400 |
| H | -2.65999000 | 0.98632400  | -1.23465400 |
| C | -5.34973200 | -0.27754300 | 0.42946100  |
| H | -5.37690800 | -2.17150200 | 1.46221800  |
| H | -4.99901400 | 1.54812500  | -0.66500600 |
| H | -6.38001600 | -0.03392000 | 0.67245000  |
| C | 0.15939300  | 0.79336100  | 1.64037300  |
| C | 0.07327200  | 1.35433900  | -1.92584800 |
| H | 0.53421800  | -0.08919900 | 2.18508900  |
| H | 0.96430200  | 1.53899800  | 1.74883400  |
| H | 1.02942300  | 1.21349200  | -2.45756600 |
| C | -1.08803800 | 1.31771400  | 2.38488800  |
| H | -0.66848500 | 0.89734100  | -2.60184200 |
| C | -0.20829300 | 2.86930600  | -1.83781500 |
| H | -0.37173800 | 3.28610200  | -2.84384000 |
| H | -1.91257300 | 0.59740900  | 2.29644300  |
| H | -0.87256800 | 1.38957100  | 3.46256300  |
| C | 0.91591800  | 3.66593800  | -1.16565900 |
| H | 0.68675600  | 4.73805800  | -1.13259100 |
| H | 1.86014800  | 3.54785300  | -1.71416300 |
| H | -1.14334400 | 3.05228000  | -1.28849000 |
| H | 1.08540700  | 3.33008900  | -0.13572000 |
| C | -1.57599900 | 2.69019000  | 1.90924700  |

|    |             |            |             |
|----|-------------|------------|-------------|
| H  | -2.42848500 | 3.03983600 | 2.50467100  |
| H  | -0.78069600 | 3.44194100 | 1.99229200  |
| H  | -1.89557600 | 2.66487600 | 0.86058400  |
| Al | 0.09456600  | 0.19308500 | -0.27417400 |

### Al\_1\_V'

E(B3LYP/BS1) = -887.534951 au

H(B3LYP/BS1) = -887.127575 au

G(B3LYP/BS1) = -887.200632 au

E(B3LYP/BS2//B3LYP/BS1, solvent = dichloromethane) = -1128.273808 au

|    |             |             |             |
|----|-------------|-------------|-------------|
| C  | -1.14186800 | -2.35856400 | -0.84415600 |
| C  | 1.33758700  | -2.28712800 | -0.86817700 |
| C  | 0.11241600  | -2.90668000 | -1.12401600 |
| H  | 2.23574800  | -2.89004000 | -1.01620500 |
| H  | 0.13830900  | -3.92235900 | -1.50084300 |
| H  | -2.00845200 | -3.01044100 | -0.97287800 |
| N  | 1.52515100  | -1.03582800 | -0.45059100 |
| N  | -1.38839400 | -1.11833400 | -0.42911300 |
| C  | 2.84480800  | -0.67571800 | -0.04381300 |
| C  | 3.38337300  | 0.56262400  | -0.42458300 |
| C  | 3.61424000  | -1.53340600 | 0.75936600  |
| C  | 4.66953000  | 0.92324700  | -0.02535300 |
| H  | 2.80126900  | 1.22933600  | -1.05151700 |
| C  | 4.90340600  | -1.16950600 | 1.14809800  |
| H  | 3.18659100  | -2.47068600 | 1.10360900  |
| C  | 5.43827400  | 0.05919800  | 0.75761400  |
| H  | 5.07359300  | 1.88308300  | -0.33549300 |
| H  | 5.48322300  | -1.84391000 | 1.77267600  |
| H  | 6.43959500  | 0.34448200  | 1.06725600  |
| C  | -2.72261800 | -0.81254700 | -0.02740100 |
| C  | -3.44141100 | -1.67222500 | 0.81803000  |
| C  | -3.32424000 | 0.37675200  | -0.46429200 |
| C  | -4.74482700 | -1.35501700 | 1.20047900  |
| H  | -2.96417600 | -2.57156200 | 1.19681700  |
| C  | -4.62476600 | 0.69090400  | -0.07152400 |
| H  | -2.77994600 | 1.03628700  | -1.13239700 |
| C  | -5.34241700 | -0.17322600 | 0.75861800  |
| H  | -5.28752600 | -2.02803500 | 1.85895300  |
| H  | -5.08019500 | 1.61238200  | -0.42380900 |
| H  | -6.35483400 | 0.07554500  | 1.06367300  |
| Al | 0.02795800  | 0.28202800  | -0.28687100 |
| C  | 0.06321100  | 1.24094300  | 1.45492800  |
| C  | -0.02330400 | 1.63331000  | -1.76301600 |
| H  | -0.45973700 | 0.71452600  | 2.26627400  |
| H  | 1.11197300  | 1.30759400  | 1.78706300  |
| H  | 0.99779300  | 1.77829300  | -2.15216200 |
| C  | -0.50056400 | 2.67965600  | 1.32281900  |
| H  | -0.60496300 | 1.31466000  | -2.64121100 |
| C  | -0.54755100 | 3.00612800  | -1.26509200 |
| H  | -0.33675700 | 3.78715200  | -2.01220100 |
| H  | -1.59938700 | 2.63959700  | 1.26833300  |
| H  | -0.27320300 | 3.26248800  | 2.22915000  |
| C  | 0.00695600  | 3.47297900  | 0.09866500  |
| H  | -0.26405200 | 4.52985400  | 0.23439100  |
| H  | 1.10836200  | 3.44683400  | 0.07664100  |
| H  | -1.64540600 | 2.97734200  | -1.18203300 |



**Ga\_1\_IV'**

E(B3LYP/BS1) = -928.094583 au

H(B3LYP/BS1) = -927.635493 au

G(B3LYP/BS1) = -927.718484 au

E(B3LYP/BS2//B3LYP/BS1, solvent = dichloromethane) = -2851.220313 au

|    |             |             |             |
|----|-------------|-------------|-------------|
| C  | -1.07616800 | -2.44593900 | -0.92293100 |
| C  | 1.41523900  | -2.38254200 | -0.86813300 |
| C  | 0.18988100  | -2.98953100 | -1.15873700 |
| H  | 2.30878300  | -2.99481300 | -1.01027900 |
| H  | 0.22364400  | -3.99965600 | -1.55030200 |
| H  | -1.93051600 | -3.10021000 | -1.11159900 |
| N  | 1.61053700  | -1.14177800 | -0.43454000 |
| N  | -1.35645600 | -1.21783000 | -0.49817400 |
| C  | 2.91872800  | -0.78537100 | -0.00425800 |
| C  | 3.43324300  | 0.48343500  | -0.31541400 |
| C  | 3.70531400  | -1.66624700 | 0.75780600  |
| C  | 4.70927000  | 0.85092400  | 0.10828300  |
| H  | 2.84016200  | 1.17047700  | -0.91004700 |
| C  | 4.98473700  | -1.29488800 | 1.17055800  |
| H  | 3.29785800  | -2.62859200 | 1.05365600  |
| C  | 5.49465100  | -0.03617000 | 0.84806600  |
| H  | 5.09287000  | 1.83463500  | -0.14882200 |
| H  | 5.57657000  | -1.98822200 | 1.76244000  |
| H  | 6.48820300  | 0.25410000  | 1.17748000  |
| C  | -2.71261000 | -0.92246300 | -0.18254000 |
| C  | -3.50036500 | -1.81585400 | 0.56270300  |
| C  | -3.27835200 | 0.29128500  | -0.60463500 |
| C  | -4.82845600 | -1.50877700 | 0.85829300  |
| H  | -3.05807400 | -2.73561100 | 0.93455500  |
| C  | -4.60437700 | 0.59457600  | -0.29856900 |
| H  | -2.68444600 | 0.98130300  | -1.19571300 |
| C  | -5.38766600 | -0.30345300 | 0.43000500  |
| H  | -5.42176600 | -2.20939800 | 1.43995900  |
| H  | -5.02813300 | 1.53526800  | -0.63969200 |
| H  | -6.42001900 | -0.06308400 | 0.66741800  |
| C  | 0.16010900  | 0.75668300  | 1.69497100  |
| C  | 0.06212600  | 1.35510100  | -1.90493000 |
| H  | 0.52692200  | -0.13917000 | 2.21823200  |
| H  | 0.96377200  | 1.49989800  | 1.81130100  |
| H  | 1.01868000  | 1.20671100  | -2.42988500 |
| C  | -1.09820700 | 1.26944000  | 2.42448000  |
| H  | -0.68714400 | 0.90108000  | -2.57093700 |
| C  | -0.21021400 | 2.86790300  | -1.79372600 |
| H  | -0.36676500 | 3.29634100  | -2.79574000 |
| H  | -1.91846200 | 0.54731300  | 2.31740000  |
| H  | -0.89331100 | 1.32780200  | 3.50480200  |
| C  | 0.91573600  | 3.64834000  | -1.10620200 |
| H  | 0.69078300  | 4.72055500  | -1.05648600 |
| H  | 1.86097100  | 3.53480500  | -1.65358400 |
| H  | -1.14743400 | 3.04707700  | -1.24722900 |
| Ga | 0.08599400  | 0.21052700  | -0.23856100 |
| H  | 1.08058400  | 3.29538100  | -0.08117900 |
| C  | -1.58210400 | 2.64658900  | 1.95886000  |
| H  | -2.44346900 | 2.98643100  | 2.54678600  |
| H  | -0.78987900 | 3.39898900  | 2.06228600  |

H -1.88787200 2.63326300 0.90587600

**Ga\_1\_V'**

E(B3LYP/BS1) = -887.575589 au

H(B3LYP/BS1) = -887.168372 au

G(B3LYP/BS1) = -887.242529 au

E(B3LYP/BS2//B3LYP/BS1, solvent = dichloromethane) = -2810.684650 au

|    |             |             |             |
|----|-------------|-------------|-------------|
| C  | -1.15763600 | -2.38798000 | -0.80373500 |
| C  | 1.33003400  | -2.32435900 | -0.82576100 |
| C  | 0.09899800  | -2.93698100 | -1.07430000 |
| H  | 2.22077600  | -2.93984300 | -0.96938400 |
| H  | 0.12200900  | -3.95645600 | -1.44134700 |
| H  | -2.01991500 | -3.04626200 | -0.93137300 |
| N  | 1.53590400  | -1.07262800 | -0.42484800 |
| N  | -1.41613700 | -1.14730900 | -0.40299200 |
| C  | 2.85631900  | -0.71765700 | -0.02539400 |
| C  | 3.39636800  | 0.51978500  | -0.40876000 |
| C  | 3.62967900  | -1.57670000 | 0.77337400  |
| C  | 4.68551900  | 0.87778500  | -0.01737700 |
| H  | 2.81201300  | 1.18785300  | -1.03232000 |
| C  | 4.92204600  | -1.21556000 | 1.15397200  |
| H  | 3.20236900  | -2.51287600 | 1.12088100  |
| C  | 5.45748800  | 0.01197900  | 0.76066900  |
| H  | 5.08976500  | 1.83682600  | -0.32992100 |
| H  | 5.50408300  | -1.89130600 | 1.77510100  |
| H  | 6.46123800  | 0.29510500  | 1.06439000  |
| C  | -2.74975900 | -0.84055800 | -0.00947800 |
| C  | -3.48281700 | -1.70574700 | 0.81875700  |
| C  | -3.34175600 | 0.35776400  | -0.43654800 |
| C  | -4.78832900 | -1.38587000 | 1.19187000  |
| H  | -3.01485000 | -2.61191000 | 1.19266700  |
| C  | -4.64411700 | 0.67458000  | -0.05298200 |
| H  | -2.78721600 | 1.02305300  | -1.09050200 |
| C  | -5.37541500 | -0.19564300 | 0.75893200  |
| H  | -5.34090900 | -2.06381600 | 1.83701500  |
| H  | -5.09070900 | 1.60307000  | -0.39829500 |
| H  | -6.38939800 | 0.05513000  | 1.05707000  |
| C  | 0.06325800  | 1.21063800  | 1.50789100  |
| C  | -0.02499300 | 1.62592300  | -1.73218500 |
| H  | -0.48207100 | 0.67853600  | 2.29842800  |
| H  | 1.11020700  | 1.24915400  | 1.84428400  |
| H  | 0.99343000  | 1.75369200  | -2.12917100 |
| C  | -0.47530300 | 2.65681200  | 1.37460500  |
| H  | -0.62596300 | 1.30686000  | -2.59507700 |
| C  | -0.52902400 | 2.99613400  | -1.21289800 |
| H  | -0.31591000 | 3.78081400  | -1.95515700 |
| H  | -1.57442900 | 2.63484500  | 1.32172200  |
| H  | -0.23591700 | 3.23260600  | 2.28201000  |
| C  | 0.04464800  | 3.44299400  | 0.15034700  |
| H  | -0.20231100 | 4.50460400  | 0.29247600  |
| H  | 1.14486200  | 3.39237300  | 0.12194500  |
| H  | -1.62604000 | 2.97756100  | -1.11992200 |
| Ga | 0.02307300  | 0.27502900  | -0.25053700 |

**In\_1\_IV'**

E(B3LYP/BS1) = -927.894018 au

H(B3LYP/BS1) = -927.435801 au

G(B3LYP/BS1) = -927.521263 au

E(B3LYP/BS2//B3LYP/BS1, solvent = dichloromethane) = -1116.492734 au

|    |             |             |             |
|----|-------------|-------------|-------------|
| C  | -1.08679000 | -2.53295100 | -0.86720300 |
| C  | 1.43351100  | -2.47221900 | -0.78246500 |
| C  | 0.19435200  | -3.06956100 | -1.04340100 |
| H  | 2.30540000  | -3.11926700 | -0.91335700 |
| H  | 0.23045200  | -4.09669200 | -1.38979500 |
| H  | -1.91561100 | -3.21924600 | -1.06236500 |
| N  | 1.68029500  | -1.22275600 | -0.40612000 |
| N  | -1.41952100 | -1.29893000 | -0.50556200 |
| C  | 3.00885200  | -0.88760000 | -0.03360500 |
| C  | 3.53834000  | 0.35877800  | -0.40853800 |
| C  | 3.80475500  | -1.75393900 | 0.73670600  |
| C  | 4.83291100  | 0.71892400  | -0.03787200 |
| H  | 2.94064000  | 1.03216100  | -1.01647200 |
| C  | 5.10206300  | -1.39021900 | 1.09689800  |
| H  | 3.39057700  | -2.69742900 | 1.08013400  |
| C  | 5.62438300  | -0.15403400 | 0.71219300  |
| H  | 5.22617200  | 1.68445000  | -0.34465500 |
| H  | 5.69964900  | -2.07159000 | 1.69694800  |
| H  | 6.63219100  | 0.12988100  | 1.00127100  |
| C  | -2.79040500 | -1.02718100 | -0.25268600 |
| C  | -3.60318100 | -1.92271500 | 0.46458500  |
| C  | -3.35067700 | 0.18119800  | -0.70083600 |
| C  | -4.94454800 | -1.62445400 | 0.70339100  |
| H  | -3.17071500 | -2.83695200 | 0.86065800  |
| C  | -4.69050600 | 0.47562300  | -0.45208900 |
| H  | -2.73924600 | 0.87305900  | -1.27324200 |
| C  | -5.49630900 | -0.42586200 | 0.24713600  |
| H  | -5.55552000 | -2.32710000 | 1.26409700  |
| H  | -5.10704700 | 1.41143000  | -0.81502100 |
| H  | -6.53945000 | -0.19317600 | 0.44090800  |
| C  | 0.10793800  | 0.77766100  | 1.97657400  |
| C  | 0.06189200  | 1.56888000  | -1.93095300 |
| H  | 0.47165800  | -0.13261600 | 2.47349100  |
| H  | 0.88700100  | 1.53563300  | 2.14399800  |
| H  | 1.01157600  | 1.41105900  | -2.46364100 |
| C  | -1.20032800 | 1.23893700  | 2.64464300  |
| H  | -0.70758900 | 1.14796100  | -2.59396600 |
| C  | -0.17512200 | 3.07880600  | -1.75137600 |
| H  | -0.27613200 | 3.56361400  | -2.73529900 |
| H  | -1.97452600 | 0.46745800  | 2.53377500  |
| H  | -1.04132700 | 1.34683900  | 3.72943700  |
| C  | 0.93984500  | 3.78904000  | -0.97595300 |
| H  | 0.75141900  | 4.86619600  | -0.89358800 |
| H  | 1.90907500  | 3.66018100  | -1.47551000 |
| H  | -1.13100800 | 3.25502400  | -1.23665200 |
| H  | 1.03655600  | 3.39108400  | 0.04248300  |
| C  | -1.74136100 | 2.56740100  | 2.10598600  |
| H  | -2.63853600 | 2.88620300  | 2.65015700  |
| H  | -0.99332500 | 3.36518200  | 2.19784200  |
| H  | -2.01252700 | 2.48951500  | 1.04485800  |
| In | 0.08300200  | 0.30330300  | -0.14839900 |

**In\_1\_V'**

E(B3LYP/BS1) = -887.369573 au

H(B3LYP/BS1) = -886.963243 au

G(B3LYP/BS1) = -887.039670 au

E(B3LYP/BS2//B3LYP/BS1, solvent = dichloromethane) = -1075.950153 au

|    |             |             |             |
|----|-------------|-------------|-------------|
| C  | -1.10871600 | -2.57745200 | -0.50053400 |
| C  | 1.40865700  | -2.48072600 | -0.50644500 |
| C  | 0.17308900  | -3.12499500 | -0.63161300 |
| H  | 2.28827700  | -3.12295500 | -0.60032200 |
| H  | 0.21396100  | -4.18876400 | -0.83815700 |
| H  | -1.93851800 | -3.28382100 | -0.58924900 |
| N  | 1.64745800  | -1.18888500 | -0.30283900 |
| N  | -1.43892000 | -1.30747100 | -0.29880000 |
| C  | 2.99499100  | -0.79188300 | -0.07809200 |
| C  | 3.48561200  | 0.37168800  | -0.69218600 |
| C  | 3.84595700  | -1.52082300 | 0.77019700  |
| C  | 4.79944600  | 0.78457200  | -0.47529000 |
| H  | 2.84066200  | 0.93362100  | -1.36129800 |
| C  | 5.16146300  | -1.10578400 | 0.97642400  |
| H  | 3.46298900  | -2.39421000 | 1.29015300  |
| C  | 5.64593900  | 0.04701500  | 0.35561000  |
| H  | 5.16379300  | 1.68308500  | -0.96600500 |
| H  | 5.80416300  | -1.67926300 | 1.63925800  |
| H  | 6.66869200  | 0.37179800  | 0.52395000  |
| C  | -2.81096800 | -1.00110300 | -0.08247100 |
| C  | -3.61350000 | -1.77375500 | 0.77356900  |
| C  | -3.37510200 | 0.11873200  | -0.71475400 |
| C  | -4.95403300 | -1.44317100 | 0.97231300  |
| H  | -3.17456800 | -2.61296100 | 1.30556100  |
| C  | -4.71388500 | 0.44695400  | -0.50553700 |
| H  | -2.76634400 | 0.71114100  | -1.39160000 |
| C  | -5.51143300 | -0.33298900 | 0.33518700  |
| H  | -5.55942900 | -2.04844500 | 1.64195600  |
| H  | -5.13590400 | 1.31227900  | -1.00948700 |
| H  | -6.55353600 | -0.07349800 | 0.49816000  |
| C  | 0.00604300  | 1.36844100  | 1.78979800  |
| C  | -0.06560800 | 1.85326100  | -1.62784100 |
| H  | -0.48574400 | 0.81664100  | 2.60029500  |
| H  | 1.04423900  | 1.52631500  | 2.11648500  |
| H  | 0.95369600  | 2.11630100  | -1.94670100 |
| C  | -0.68043500 | 2.74032300  | 1.58431300  |
| H  | -0.59012300 | 1.54778600  | -2.54263300 |
| C  | -0.73696300 | 3.10863200  | -1.01946300 |
| H  | -0.63798500 | 3.95567400  | -1.71682800 |
| H  | -1.76798400 | 2.59605100  | 1.49522900  |
| H  | -0.54022500 | 3.36133100  | 2.48345000  |
| C  | -0.20749800 | 3.56363500  | 0.36209100  |
| H  | -0.53021100 | 4.60290800  | 0.51530800  |
| H  | 0.89354300  | 3.59387900  | 0.34250200  |
| H  | -1.82043700 | 2.93820500  | -0.92245600 |
| In | 0.04589600  | 0.31240800  | -0.09934200 |

**La\_1\_IV'**

E(B3LYP/BS1) = -957.258553 au

H(B3LYP/BS1) = -956.804963 au

G(B3LYP/BS1) = -956.897421 au

E(B3LYP/BS2//B3LYP/BS1, solvent = dichloromethane) = -957.927385 au

|    |             |             |             |
|----|-------------|-------------|-------------|
| C  | -1.22416900 | -2.82748500 | -0.85701100 |
| C  | 1.29185600  | -2.88168400 | -0.68955500 |
| C  | 0.02880000  | -3.45544800 | -0.89099500 |
| H  | 2.13755000  | -3.57733400 | -0.72421000 |
| H  | 0.01888800  | -4.52287900 | -1.08464300 |
| H  | -2.08782800 | -3.48641200 | -1.00013900 |
| N  | 1.57513100  | -1.60234700 | -0.48211800 |
| N  | -1.47459700 | -1.53540200 | -0.69241600 |
| C  | 2.89186400  | -1.22338300 | -0.14862300 |
| C  | 3.40034800  | -0.02407100 | -0.68881100 |
| C  | 3.68611100  | -1.93521700 | 0.77222200  |
| C  | 4.66267700  | 0.44561300  | -0.31883200 |
| H  | 2.83306700  | 0.50680900  | -1.45327600 |
| C  | 4.95026500  | -1.46663000 | 1.12267800  |
| H  | 3.29089700  | -2.83706500 | 1.23091000  |
| C  | 5.44438600  | -0.27361200 | 0.58552000  |
| H  | 5.03754900  | 1.36784100  | -0.75420300 |
| H  | 5.54809300  | -2.02860000 | 1.83560200  |
| H  | 6.42646400  | 0.09062300  | 0.87222000  |
| C  | -2.80375700 | -1.09531400 | -0.53094300 |
| C  | -3.73675400 | -1.75606900 | 0.29279000  |
| C  | -3.18778400 | 0.11520200  | -1.14466100 |
| C  | -5.01249900 | -1.22777700 | 0.47747300  |
| H  | -3.44129100 | -2.66642300 | 0.80644100  |
| C  | -4.46465500 | 0.64412200  | -0.94186600 |
| H  | -2.50706900 | 0.60423500  | -1.84109700 |
| C  | -5.38310700 | -0.02482000 | -0.13211100 |
| H  | -5.71823800 | -1.75072000 | 1.11767200  |
| H  | -4.74244400 | 1.57245200  | -1.43352400 |
| H  | -6.37591900 | 0.38580000  | 0.02593400  |
| C  | 0.15031500  | 1.26474500  | 2.24470100  |
| C  | 0.23048600  | 2.22789400  | -1.94436300 |
| H  | 1.14295500  | 0.90217400  | 2.58541400  |
| H  | 0.25152600  | 2.36805300  | 2.22230800  |
| H  | 1.08893500  | 2.02247700  | -2.61320900 |
| C  | -0.90472600 | 0.88439500  | 3.29770700  |
| H  | -0.65429700 | 2.07625100  | -2.59500100 |
| C  | 0.28327400  | 3.70572300  | -1.51238400 |
| H  | 0.20711000  | 4.39073200  | -2.37430800 |
| H  | -0.98792700 | -0.21241000 | 3.36919800  |
| H  | -0.61550400 | 1.21739700  | 4.30945200  |
| C  | 1.56125600  | 4.06164200  | -0.73976500 |
| H  | 1.59121800  | 5.12319800  | -0.46465000 |
| H  | 2.45328800  | 3.85017900  | -1.34423900 |
| H  | -0.58555500 | 3.94731600  | -0.87766000 |
| H  | 1.64836300  | 3.48233800  | 0.19062700  |
| C  | -2.29368600 | 1.46218700  | 2.99125900  |
| H  | -3.02289300 | 1.20929400  | 3.77121100  |
| H  | -2.25174100 | 2.55686900  | 2.91794000  |
| H  | -2.69275800 | 1.08487500  | 2.03881600  |
| La | 0.06808500  | 0.43100200  | -0.13997200 |

La\_1\_V'

E(B3LYP/BS1) = -916.732817 au

H(B3LYP/BS1) = -916.330850 au

G(B3LYP/BS1) = -916.413311 au

E(B3LYP/BS2//B3LYP/BS1, solvent = dichloromethane) = -917.385071 au

|    |             |             |             |
|----|-------------|-------------|-------------|
| C  | -1.05914200 | -2.99022100 | -0.24141000 |
| C  | 1.46647000  | -2.86381000 | -0.23987500 |
| C  | 0.23408900  | -3.53366800 | -0.24302300 |
| H  | 2.35182100  | -3.50952400 | -0.22317500 |
| H  | 0.28829500  | -4.61733700 | -0.24981600 |
| H  | -1.87540100 | -3.72130300 | -0.22551700 |
| N  | 1.67751300  | -1.55501500 | -0.27906600 |
| N  | -1.40025000 | -1.70922300 | -0.28092700 |
| C  | 2.98539100  | -1.04994200 | -0.13879400 |
| C  | 3.35434900  | 0.06987300  | -0.91329600 |
| C  | 3.90867600  | -1.54709300 | 0.80267100  |
| C  | 4.60593400  | 0.66792900  | -0.75321800 |
| H  | 2.68241400  | 0.43070400  | -1.69248500 |
| C  | 5.16064600  | -0.95247500 | 0.94489700  |
| H  | 3.62452600  | -2.38099900 | 1.43819200  |
| C  | 5.51608000  | 0.15867300  | 0.17396100  |
| H  | 4.87157100  | 1.52353200  | -1.36809500 |
| H  | 5.85902100  | -1.35007000 | 1.67682900  |
| H  | 6.49011000  | 0.62256300  | 0.29803100  |
| C  | -2.75184900 | -1.33774600 | -0.13764400 |
| C  | -3.61793700 | -1.92428700 | 0.80676600  |
| C  | -3.23342800 | -0.26155200 | -0.91219500 |
| C  | -4.92297800 | -1.45815200 | 0.95193000  |
| H  | -3.24927400 | -2.72491600 | 1.44161300  |
| C  | -4.53827600 | 0.20791200  | -0.74933600 |
| H  | -2.60237400 | 0.16359600  | -1.69307200 |
| C  | -5.39003800 | -0.38909100 | 0.18101300  |
| H  | -5.57600800 | -1.92279000 | 1.68622300  |
| H  | -4.89009300 | 1.03207100  | -1.36381300 |
| H  | -6.40527000 | -0.02497100 | 0.30769200  |
| C  | 0.07205300  | 1.83831500  | 1.96702900  |
| C  | -0.10919200 | 2.32432800  | -1.71044600 |
| H  | -0.27557500 | 1.41180800  | 2.92135300  |
| H  | 1.15087300  | 2.05354900  | 2.11923100  |
| H  | 0.87378400  | 2.76675800  | -1.95181000 |
| C  | -0.66349800 | 3.17463700  | 1.70879600  |
| H  | -0.59311600 | 2.13083400  | -2.68216500 |
| C  | -0.94741500 | 3.37079900  | -0.92801200 |
| H  | -1.16354200 | 4.23647700  | -1.57515200 |
| H  | -1.75289300 | 3.00370100  | 1.73227700  |
| H  | -0.47127600 | 3.88411800  | 2.53184500  |
| C  | -0.33421200 | 3.92260500  | 0.39065700  |
| H  | -0.69043800 | 4.95468600  | 0.51245400  |
| H  | 0.75932200  | 4.00200800  | 0.27727300  |
| H  | -1.94567500 | 2.95674100  | -0.68873700 |
| La | 0.03831600  | 0.40993400  | -0.08898300 |

### Sc\_1\_IV'

E(B3LYP/BS1) = -972.499244 au

H(B3LYP/BS1) = -972.044030 au

G(B3LYP/BS1) = -972.132462 au

E(B3LYP/BS2//B3LYP/BS1, solvent = dichloromethane) = -1687.057772 au

|    |             |             |             |
|----|-------------|-------------|-------------|
| C  | -1.11443000 | -2.52945300 | -0.98444100 |
| C  | 1.39498300  | -2.50210800 | -0.87245100 |
| C  | 0.15771300  | -3.07800100 | -1.18521400 |
| H  | 2.27143800  | -3.14105800 | -1.01359800 |
| H  | 0.18597900  | -4.08669000 | -1.58268600 |
| H  | -1.95996800 | -3.18877300 | -1.20066100 |
| N  | 1.62095600  | -1.27042300 | -0.42186800 |
| N  | -1.41059600 | -1.30183800 | -0.56106700 |
| C  | 2.92906900  | -0.94058700 | 0.02096700  |
| C  | 3.46144800  | 0.31861000  | -0.30464800 |
| C  | 3.68947000  | -1.81493000 | 0.81725500  |
| C  | 4.72750200  | 0.68869600  | 0.14877600  |
| H  | 2.89504700  | 0.99312900  | -0.94282100 |
| C  | 4.95945400  | -1.44239700 | 1.25504500  |
| H  | 3.26743600  | -2.77058200 | 1.11491900  |
| C  | 5.48479600  | -0.19062500 | 0.92500600  |
| H  | 5.12498600  | 1.66445300  | -0.11672000 |
| H  | 5.53433000  | -2.12886900 | 1.87110700  |
| H  | 6.47140000  | 0.09844000  | 1.27539500  |
| C  | -2.76577200 | -1.01184400 | -0.24709600 |
| C  | -3.55194800 | -1.88941600 | 0.51998100  |
| C  | -3.32645300 | 0.20310000  | -0.67649800 |
| C  | -4.87183500 | -1.56441500 | 0.82945100  |
| H  | -3.11312600 | -2.81057500 | 0.89281800  |
| C  | -4.64455700 | 0.52587600  | -0.35304100 |
| H  | -2.73902600 | 0.87591600  | -1.29669100 |
| C  | -5.42452400 | -0.35657700 | 0.39654900  |
| H  | -5.46599700 | -2.25295400 | 1.42447600  |
| H  | -5.06379200 | 1.46680800  | -0.69866600 |
| H  | -6.45090300 | -0.10368200 | 0.64614100  |
| C  | 0.09694000  | 1.15832400  | 1.75508600  |
| C  | 0.12141400  | 1.66450700  | -1.95809100 |
| H  | 0.62218600  | 0.37973300  | 2.34428400  |
| H  | 0.80061200  | 2.01285800  | 1.72591900  |
| H  | 0.97415200  | 1.37760700  | -2.60435100 |
| C  | -1.17578600 | 1.58506200  | 2.51079200  |
| H  | -0.76567300 | 1.34762100  | -2.54431700 |
| C  | 0.10134300  | 3.19837500  | -1.81237500 |
| H  | -0.09062200 | 3.68613000  | -2.78242500 |
| H  | -1.90038500 | 0.75662600  | 2.52985600  |
| H  | -0.95291000 | 1.80252500  | 3.56845200  |
| C  | 1.40481200  | 3.77252100  | -1.24305100 |
| H  | 1.36797400  | 4.86667100  | -1.17217500 |
| H  | 2.25892900  | 3.51202000  | -1.88295900 |
| H  | -0.72955400 | 3.50571600  | -1.15978400 |
| H  | 1.60968000  | 3.38163600  | -0.23821500 |
| C  | -1.85467600 | 2.81962900  | 1.90450600  |
| H  | -2.74234900 | 3.11505000  | 2.47775400  |
| H  | -1.16712200 | 3.67486900  | 1.88673200  |
| H  | -2.17596200 | 2.63531900  | 0.87117200  |
| Sc | 0.07937800  | 0.26903800  | -0.24721300 |

**Sc\_1\_V'**

E(B3LYP/BS1) = -931.981402 au

H(B3LYP/BS1) = -931.577756 au

G(B3LYP/BS1) = -931.654763 au

E(B3LYP/BS2//B3LYP/BS1, solvent = dichloromethane) = -1646.523164 au

|    |             |             |             |
|----|-------------|-------------|-------------|
| C  | -1.08667900 | -2.48512400 | -0.81526900 |
| C  | 1.43023800  | -2.37196400 | -0.82700200 |
| C  | 0.19584700  | -2.98901600 | -1.06709100 |
| H  | 2.31363700  | -2.99438100 | -0.99703700 |
| H  | 0.23977700  | -4.00374000 | -1.44780400 |
| H  | -1.91348100 | -3.18198400 | -0.98116700 |
| N  | 1.65193800  | -1.12463700 | -0.41521300 |
| N  | -1.41196900 | -1.26302800 | -0.39881100 |
| C  | 2.97487700  | -0.76865700 | -0.03983600 |
| C  | 3.48308800  | 0.48369400  | -0.42455000 |
| C  | 3.77758600  | -1.61414800 | 0.74595000  |
| C  | 4.76517200  | 0.87467100  | -0.03998100 |
| H  | 2.88168900  | 1.13618400  | -1.05298500 |
| C  | 5.06276000  | -1.22079800 | 1.11689000  |
| H  | 3.37721600  | -2.56413800 | 1.08838800  |
| C  | 5.56311600  | 0.02381800  | 0.72773900  |
| H  | 5.14338000  | 1.84458100  | -0.35131000 |
| H  | 5.66931800  | -1.88532900 | 1.72658100  |
| H  | 6.56175400  | 0.33004200  | 1.02551000  |
| C  | -2.75899000 | -1.01254300 | -0.02694300 |
| C  | -3.49603900 | -1.91475600 | 0.75979800  |
| C  | -3.36095200 | 0.19482900  | -0.42060400 |
| C  | -4.80961700 | -1.62061200 | 1.12285900  |
| H  | -3.02445200 | -2.82951600 | 1.10744900  |
| C  | -4.67129600 | 0.48707800  | -0.04277700 |
| H  | -2.81055400 | 0.88732900  | -1.05341900 |
| C  | -5.40355400 | -0.42019100 | 0.72556900  |
| H  | -5.36609100 | -2.32765400 | 1.73250200  |
| H  | -5.12251200 | 1.42292700  | -0.36085300 |
| H  | -6.42457300 | -0.19193200 | 1.01735500  |
| C  | 0.04961600  | 1.62148600  | 1.55307400  |
| C  | -0.05374000 | 1.92670800  | -1.75135300 |
| H  | -0.33745800 | 1.11198000  | 2.45209800  |
| H  | 1.10986000  | 1.84921200  | 1.77722200  |
| H  | 0.99012200  | 2.18237900  | -2.02054400 |
| C  | -0.71501900 | 2.94729900  | 1.33840000  |
| H  | -0.51162800 | 1.58664500  | -2.69636200 |
| C  | -0.76234900 | 3.21324100  | -1.26523400 |
| H  | -0.64857400 | 4.01788400  | -2.01032600 |
| H  | -1.79550000 | 2.74143500  | 1.26399200  |
| H  | -0.60649400 | 3.59837700  | 2.22152800  |
| C  | -0.29618300 | 3.76594100  | 0.09832500  |
| H  | -0.70053400 | 4.78272200  | 0.20738700  |
| H  | 0.79994300  | 3.87852800  | 0.08994800  |
| H  | -1.84860500 | 3.03556500  | -1.20136700 |
| Sc | 0.04841400  | 0.36003900  | -0.22125700 |

**Y\_1\_IV'**

E(B3LYP/BS1) = -963.982663 au

H(B3LYP/BS1) = -963.528199 au

G(B3LYP/BS1) = -963.618417 au

E(B3LYP/BS2//B3LYP/BS1, solvent = dichloromethane) = -964.680969 au

|   |             |             |             |
|---|-------------|-------------|-------------|
| C | -1.17453600 | -2.68576100 | -0.84148500 |
| C | 1.34334400  | -2.70538000 | -0.70931300 |



|   |             |             |             |
|---|-------------|-------------|-------------|
| C | 0.08841000  | -3.28505600 | -0.93539100 |
| H | 2.19915500  | -3.38375300 | -0.78163300 |
| H | 0.09327000  | -4.33942200 | -1.19019300 |
| H | -2.02828500 | -3.35211700 | -1.00003000 |
| N | 1.61172700  | -1.43385700 | -0.42896600 |
| N | -1.45432000 | -1.40887600 | -0.59670400 |
| C | 2.93429800  | -1.07298100 | -0.07079500 |
| C | 3.45035400  | 0.14777800  | -0.54403600 |
| C | 3.72184700  | -1.84893200 | 0.79982500  |
| C | 4.72106000  | 0.57757900  | -0.15819800 |
| H | 2.87284100  | 0.73906200  | -1.25310400 |
| C | 4.99569200  | -1.41945900 | 1.16671900  |
| H | 3.31696000  | -2.76963100 | 1.21000100  |
| C | 5.50115500  | -0.20489600 | 0.69416500  |
| H | 5.10329300  | 1.52093700  | -0.53813300 |
| H | 5.59032000  | -2.02953000 | 1.84161300  |
| H | 6.49060500  | 0.12912800  | 0.99234600  |
| C | -2.80892600 | -1.03751800 | -0.39894200 |
| C | -3.67486400 | -1.77014200 | 0.43332400  |
| C | -3.28462500 | 0.14137400  | -1.00181100 |
| C | -4.98477900 | -1.34028700 | 0.63763200  |
| H | -3.30462600 | -2.65820700 | 0.93762700  |
| C | -4.59480800 | 0.57060700  | -0.78244500 |
| H | -2.64003900 | 0.69464000  | -1.68212500 |
| C | -5.45119100 | -0.16878200 | 0.03467800  |
| H | -5.64046900 | -1.91611400 | 1.28544900  |
| H | -4.94652200 | 1.47911300  | -1.26346000 |
| H | -6.47030500 | 0.16574400  | 0.20484900  |
| C | 0.15056200  | 1.19181800  | 2.02889200  |
| C | 0.17737600  | 1.97733900  | -1.92619100 |
| H | 0.96488700  | 0.60584300  | 2.50245900  |
| H | 0.56257700  | 2.21874400  | 1.95684600  |
| H | 1.01055300  | 1.72337500  | -2.61160300 |
| C | -1.05676000 | 1.21765600  | 2.98617800  |
| H | -0.72452700 | 1.77367300  | -2.54012800 |
| C | 0.23340400  | 3.49017300  | -1.63040100 |
| H | 0.09732300  | 4.08774600  | -2.54758000 |
| H | -1.45840100 | 0.20017400  | 3.11433500  |
| H | -0.76455100 | 1.54451100  | 3.99843500  |
| C | 1.54762000  | 3.92990600  | -0.97248900 |
| H | 1.57288800  | 5.01260600  | -0.79703300 |
| H | 2.40613800  | 3.67848800  | -1.60991300 |
| H | -0.60006100 | 3.77742700  | -0.97028900 |
| H | 1.69869700  | 3.43559400  | -0.00314800 |
| C | -2.18890000 | 2.13338100  | 2.50208700  |
| H | -3.02092000 | 2.16626200  | 3.21682000  |
| H | -1.82746900 | 3.16087400  | 2.36443200  |
| H | -2.59888300 | 1.79653200  | 1.53977000  |
| Y | 0.07870000  | 0.34376700  | -0.18125500 |

**Y\_1\_V'**

E(B3LYP/BS1) = -923.460629 au

H(B3LYP/BS1) = -923.057792 au

G(B3LYP/BS1) = -923.137570 au

E(B3LYP/BS2//B3LYP/BS1, solvent = dichloromethane) = -924.142987 au

|   |             |             |             |
|---|-------------|-------------|-------------|
| C | -1.05751700 | -2.77497200 | -0.45326700 |
|---|-------------|-------------|-------------|

ESI105

|   |             |             |             |
|---|-------------|-------------|-------------|
| C | 1.46820800  | -2.64545600 | -0.45412500 |
| C | 0.23578200  | -3.30748300 | -0.54682700 |
| H | 2.35219400  | -3.28866000 | -0.51135700 |
| H | 0.29105100  | -4.38076400 | -0.69502100 |
| H | -1.87260200 | -3.50332600 | -0.51252400 |
| N | 1.68808700  | -1.34084900 | -0.32169500 |
| N | -1.40579700 | -1.49921900 | -0.31880900 |
| C | 3.01236300  | -0.88771000 | -0.10175300 |
| C | 3.43834000  | 0.28777300  | -0.74796300 |
| C | 3.89302700  | -1.52483900 | 0.79181900  |
| C | 4.71172200  | 0.80702300  | -0.51040900 |
| H | 2.78514100  | 0.77024900  | -1.47356500 |
| C | 5.16799700  | -1.00691000 | 1.01281300  |
| H | 3.56026000  | -2.40679300 | 1.33158900  |
| C | 5.58379900  | 0.16079400  | 0.36720000  |
| H | 5.02383500  | 1.71188700  | -1.02449600 |
| H | 5.83485400  | -1.51007900 | 1.70807100  |
| H | 6.57500700  | 0.56470400  | 0.55117900  |
| C | -2.76738400 | -1.17298200 | -0.10605400 |
| C | -3.59330600 | -1.89413000 | 0.77588700  |
| C | -3.29262000 | -0.03596100 | -0.74869400 |
| C | -4.91209500 | -1.49633900 | 0.98766300  |
| H | -3.18608000 | -2.74555600 | 1.31364600  |
| C | -4.61014400 | 0.36326500  | -0.51933500 |
| H | -2.68001300 | 0.50846100  | -1.46641600 |
| C | -5.42705300 | -0.36667400 | 0.34545800  |
| H | -5.53656900 | -2.06325800 | 1.67317000  |
| H | -4.99896900 | 1.23974200  | -1.03016100 |
| H | -6.45277600 | -0.05674000 | 0.52238500  |
| C | 0.00463900  | 1.68076200  | 1.81907200  |
| C | -0.08361800 | 2.13883600  | -1.67125800 |
| H | -0.38822400 | 1.19914300  | 2.73023500  |
| H | 1.05399200  | 1.94067900  | 2.06365300  |
| H | 0.94578200  | 2.47310600  | -1.90837800 |
| C | -0.77906000 | 2.99503000  | 1.56852700  |
| H | -0.53018400 | 1.90186800  | -2.65236900 |
| C | -0.84519600 | 3.33949600  | -1.05067800 |
| H | -0.81042300 | 4.20511200  | -1.73331100 |
| H | -1.85511200 | 2.77089000  | 1.47377600  |
| H | -0.70377000 | 3.65649300  | 2.44798300  |
| C | -0.35869200 | 3.82989600  | 0.33457100  |
| H | -0.74723000 | 4.84845100  | 0.47754600  |
| H | 0.73881400  | 3.93115200  | 0.31976800  |
| H | -1.91681700 | 3.09267900  | -0.96072700 |
| Y | 0.04632500  | 0.36114200  | -0.12095000 |

### Al 1 II'

E(B3LYP/BS1) = -848.602058 au

H(B3LYP/BS1) = -848.212870 au

G(B3LYP/BS1) = -848.290135 au

E(B3LYP/BS2//B3LYP/BS1, solvent = dichloromethane) = -1089.373755 au

E(M06/BS2//B3LYP/BS1, solvent = dichloromethane) = -1088.667194 au

|   |             |             |             |
|---|-------------|-------------|-------------|
| C | -1.12906600 | -2.14718500 | -0.73055200 |
| C | 1.34881500  | -2.08056600 | -0.74233500 |
| C | 0.12576800  | -2.74371800 | -0.85234100 |

|    |             |             |             |
|----|-------------|-------------|-------------|
| H  | 2.25666400  | -2.66065900 | -0.90537200 |
| H  | 0.15302700  | -3.79779600 | -1.09972200 |
| H  | -2.00806700 | -2.77359900 | -0.88110000 |
| C  | -0.40726400 | 0.63148700  | 2.54162100  |
| C  | 0.37614900  | -0.45782800 | 2.44362900  |
| N  | 1.52290600  | -0.77929200 | -0.47160200 |
| N  | -1.36729000 | -0.85475100 | -0.46322300 |
| C  | 2.87400400  | -0.29665100 | -0.31910400 |
| C  | 3.28571600  | 0.83997400  | -1.02552700 |
| C  | 3.76725500  | -0.94816500 | 0.54265900  |
| C  | 4.58734000  | 1.31809000  | -0.87059000 |
| H  | 2.60414100  | 1.32613500  | -1.71749600 |
| C  | 5.06907100  | -0.46604700 | 0.68637200  |
| H  | 3.44324000  | -1.82132300 | 1.10300400  |
| C  | 5.48087300  | 0.66791400  | -0.01635700 |
| H  | 4.90536400  | 2.19285900  | -1.42962000 |
| H  | 5.75750600  | -0.97502500 | 1.35422300  |
| H  | 6.49306300  | 1.04248800  | 0.09985300  |
| C  | -2.74388100 | -0.44066900 | -0.32643800 |
| C  | -3.57331100 | -1.04882600 | 0.62500200  |
| C  | -3.24257900 | 0.57929400  | -1.14514800 |
| C  | -4.90118100 | -0.63658100 | 0.75055900  |
| H  | -3.17930700 | -1.83454400 | 1.26443300  |
| C  | -4.57032200 | 0.98765500  | -1.00951800 |
| H  | -2.60582700 | 1.02414400  | -1.90481700 |
| C  | -5.40049600 | 0.38252900  | -0.06289000 |
| H  | -5.54208000 | -1.11096000 | 1.48760800  |
| H  | -4.95823800 | 1.77026600  | -1.65442600 |
| H  | -6.43308700 | 0.70190300  | 0.03782900  |
| H  | 1.45565800  | -0.39154400 | 2.55898900  |
| H  | -0.04029900 | -1.45408600 | 2.31232400  |
| H  | 0.01118600  | 1.61386500  | 2.74364400  |
| H  | -1.49264400 | 0.56408100  | 2.49036200  |
| C  | 0.09626500  | 2.30184800  | -0.36228500 |
| Al | 0.04378200  | 0.35939000  | -0.07498900 |
| C  | -1.01049900 | 3.20917100  | 0.21270400  |
| H  | -1.03619600 | 3.18689800  | 1.30776100  |
| H  | -0.84560600 | 4.25196400  | -0.08026900 |
| H  | -2.00562200 | 2.92217900  | -0.14062400 |
| H  | 1.07786500  | 2.64804700  | -0.00883400 |
| H  | 0.13483000  | 2.43056700  | -1.45588800 |

### Ga\_1\_II'

E(B3LYP/BS1) = -848.643481 au

H(B3LYP/BS1) = -848.254566 au

G(B3LYP/BS1) = -848.333520 au

E(B3LYP/BS2//B3LYP/BS1, solvent = dichloromethane) = -2771.786038 au

E(M06/BS2//B3LYP/BS1, solvent = dichloromethane) = -2771.021190 au

|   |             |             |             |
|---|-------------|-------------|-------------|
| C | -1.13447700 | -2.18156400 | -0.70141800 |
| C | 1.34890200  | -2.12047200 | -0.70817800 |
| C | 0.12162500  | -2.77899500 | -0.80378000 |
| H | 2.25236400  | -2.71037300 | -0.85965800 |
| H | 0.14695700  | -3.83857800 | -1.02694200 |
| H | -2.01052700 | -2.81374600 | -0.84411200 |
| C | -0.45570200 | 0.48915300  | 2.69389700  |

|    |             |             |             |
|----|-------------|-------------|-------------|
| C  | 0.37109700  | -0.55449400 | 2.51334500  |
| N  | 1.53388300  | -0.81653300 | -0.46848800 |
| N  | -1.38203700 | -0.88561600 | -0.46678300 |
| C  | 2.88264900  | -0.32966000 | -0.33004800 |
| C  | 3.27944300  | 0.81016300  | -1.03988200 |
| C  | 3.78964200  | -0.97776200 | 0.51945400  |
| C  | 4.58047000  | 1.29437800  | -0.90214700 |
| H  | 2.58601900  | 1.29391700  | -1.72213100 |
| C  | 5.09094300  | -0.48955200 | 0.64592700  |
| H  | 3.47630200  | -1.85033900 | 1.08641300  |
| C  | 5.48841500  | 0.64680600  | -0.06106700 |
| H  | 4.88686300  | 2.17155500  | -1.46390000 |
| H  | 5.79010200  | -0.99524700 | 1.30505200  |
| H  | 6.50030100  | 1.02592500  | 0.04224200  |
| C  | -2.75676900 | -0.46704600 | -0.34880200 |
| C  | -3.60901800 | -1.08562700 | 0.57503100  |
| C  | -3.23295600 | 0.56866300  | -1.16115900 |
| C  | -4.93703200 | -0.66784700 | 0.67891300  |
| H  | -3.23242200 | -1.88099700 | 1.21280700  |
| C  | -4.56063300 | 0.98282200  | -1.04681400 |
| H  | -2.57822700 | 1.02157700  | -1.90084500 |
| C  | -5.41392500 | 0.36702200  | -0.12788900 |
| H  | -5.59530800 | -1.14958300 | 1.39558100  |
| H  | -4.93065400 | 1.77793000  | -1.68695200 |
| H  | -6.44657300 | 0.69081700  | -0.04331700 |
| H  | 1.44821700  | -0.45005200 | 2.62165600  |
| H  | -0.00436800 | -1.55726300 | 2.32207100  |
| H  | -0.07588800 | 1.47404600  | 2.95223800  |
| H  | -1.53725000 | 0.38140300  | 2.64337300  |
| C  | 0.10681500  | 2.29691200  | -0.26178600 |
| C  | -1.02278600 | 3.13793600  | 0.35817900  |
| H  | -1.07283000 | 3.02405900  | 1.44600800  |
| H  | -0.85645600 | 4.20151500  | 0.15425100  |
| H  | -2.00500200 | 2.87417200  | -0.04481200 |
| H  | 1.07949900  | 2.60929500  | 0.13801800  |
| H  | 0.16146300  | 2.48722800  | -1.34333700 |
| Ga | 0.04304100  | 0.33815400  | -0.08991900 |

### In\_1\_H'

E(B3LYP/BS1) = -848.445546 au

H(B3LYP/BS1) = -848.057433 au

G(B3LYP/BS1) = -848.138934 au

E(B3LYP/BS2//B3LYP/BS1, solvent = dichloromethane) = -1037.062253 au

E(M06/BS2//B3LYP/BS1, solvent = dichloromethane) = -1036.382604 au

|   |             |             |             |
|---|-------------|-------------|-------------|
| C | -1.13913500 | -2.27563100 | -0.67250800 |
| C | 1.37489900  | -2.21015500 | -0.66070900 |
| C | 0.13342100  | -2.84674800 | -0.75827500 |
| H | 2.25706400  | -2.83986400 | -0.78283900 |
| H | 0.16194600  | -3.91139100 | -0.95833300 |
| H | -1.98719200 | -2.94984500 | -0.79917000 |
| C | -0.58827500 | 0.60260900  | 2.70172700  |
| C | 0.32730600  | -0.37837400 | 2.61189600  |
| N | 1.61176100  | -0.91132900 | -0.45474000 |
| N | -1.44612800 | -0.98912400 | -0.47369400 |
| C | 2.96994000  | -0.47163300 | -0.30060400 |

|    |             |             |             |
|----|-------------|-------------|-------------|
| C  | 3.39777400  | 0.67748200  | -0.97939900 |
| C  | 3.86022400  | -1.15428300 | 0.54067300  |
| C  | 4.70703400  | 1.13295900  | -0.82424400 |
| H  | 2.72109700  | 1.18920200  | -1.66006500 |
| C  | 5.17047500  | -0.69563600 | 0.68453300  |
| H  | 3.52470100  | -2.02859600 | 1.09171600  |
| C  | 5.59697100  | 0.44767800  | 0.00615200  |
| H  | 5.03416000  | 2.01625700  | -1.36442400 |
| H  | 5.85445700  | -1.22947700 | 1.33753600  |
| H  | 6.61573600  | 0.80328500  | 0.12420000  |
| C  | -2.82818400 | -0.62394300 | -0.33842100 |
| C  | -3.67872900 | -1.32611800 | 0.52747800  |
| C  | -3.32171000 | 0.46978000  | -1.06274000 |
| C  | -5.01427900 | -0.94005600 | 0.65406200  |
| H  | -3.29323700 | -2.15940800 | 1.10870000  |
| C  | -4.65611700 | 0.85294300  | -0.92508900 |
| H  | -2.67462800 | 0.99004600  | -1.76534600 |
| C  | -5.50551100 | 0.14954600  | -0.06751900 |
| H  | -5.66744800 | -1.48851200 | 1.32622400  |
| H  | -5.03472700 | 1.69211300  | -1.50084300 |
| H  | -6.54377600 | 0.44859400  | 0.03658800  |
| H  | 1.38601900  | -0.18831700 | 2.77575800  |
| H  | 0.03994900  | -1.41275800 | 2.43608800  |
| H  | -0.30467300 | 1.62406300  | 2.94306200  |
| H  | -1.65302900 | 0.40231400  | 2.59676900  |
| C  | 0.09495700  | 2.56519600  | -0.39848600 |
| C  | -1.04256700 | 3.38338200  | 0.23127000  |
| H  | -2.02809700 | 3.07509800  | -0.13217400 |
| H  | -1.05378300 | 3.30281800  | 1.32358500  |
| H  | -0.92091000 | 4.44591800  | -0.01002500 |
| H  | 1.06996700  | 2.89578100  | -0.02326100 |
| H  | 0.11963700  | 2.71340600  | -1.48536900 |
| In | 0.04217100  | 0.44405000  | -0.12118600 |

### La\_1\_II'

E(B3LYP/BS1) = -877.849966 au

H(B3LYP/BS1) = -877.465250 au

G(B3LYP/BS1) = -877.551672 au

E(B3LYP/BS2//B3LYP/BS1, solvent = dichloromethane) = -878.550053 au

E(M06/BS2//B3LYP/BS1, solvent = dichloromethane) = -877.816075 au

|   |             |             |             |
|---|-------------|-------------|-------------|
| C | -1.24129500 | 2.73517200  | 0.27789800  |
| C | 1.24171900  | 2.73508100  | 0.27778500  |
| C | 0.00023000  | 3.37216100  | 0.36291200  |
| H | 2.12838500  | 3.37184500  | 0.22129400  |
| H | 0.00026800  | 4.45404400  | 0.42455800  |
| H | -2.12793600 | 3.37198600  | 0.22158400  |
| C | -0.00215900 | -3.22008600 | -1.63123400 |
| C | -0.00048000 | -2.22414900 | -2.53193600 |
| N | 1.43500700  | 1.41766900  | 0.25262100  |
| N | -1.43469300 | 1.41776100  | 0.25267800  |
| C | 2.67402600  | 0.85691600  | -0.12285200 |
| C | 3.12057000  | -0.28425400 | 0.58136400  |
| C | 3.40338300  | 1.29167000  | -1.24761700 |
| C | 4.27406000  | -0.96564500 | 0.17126900  |
| H | 2.64645500  | -0.55206500 | 1.52730500  |

|    |             |             |             |
|----|-------------|-------------|-------------|
| C  | 4.55845100  | 0.61591000  | -1.63356300 |
| H  | 3.05083800  | 2.14924900  | -1.81364800 |
| C  | 4.99289600  | -0.51865900 | -0.93602700 |
| H  | 4.62248200  | -1.82174200 | 0.74180400  |
| H  | 5.12064600  | 0.96965600  | -2.49305000 |
| H  | 5.89228800  | -1.03896700 | -1.24987100 |
| C  | -2.67385100 | 0.85714900  | -0.12257100 |
| C  | -3.40319100 | 1.29180500  | -1.24738600 |
| C  | -3.12059800 | -0.28374500 | 0.58195300  |
| C  | -4.55844400 | 0.61621700  | -1.63308200 |
| H  | -3.05048600 | 2.14917700  | -1.81363100 |
| C  | -4.27427500 | -0.96497600 | 0.17210900  |
| H  | -2.64645900 | -0.55145100 | 1.52791800  |
| C  | -4.99309400 | -0.51808300 | -0.93523400 |
| H  | -5.12063500 | 0.96988700  | -2.49260400 |
| H  | -4.62284700 | -1.82085800 | 0.74287300  |
| H  | -5.89263500 | -1.03825500 | -1.24887900 |
| H  | 0.92620000  | -1.82903100 | -2.94538800 |
| H  | -0.92575300 | -1.82685900 | -2.94644900 |
| H  | 0.92303000  | -3.67134800 | -1.27595100 |
| H  | -0.92881000 | -3.66919300 | -1.27703300 |
| C  | 0.00072000  | -1.54981600 | 2.48574000  |
| C  | 0.00124800  | -0.72552800 | 3.78145200  |
| H  | 0.00177200  | -1.35437400 | 4.68239900  |
| H  | 0.88256400  | -0.07501600 | 3.84607700  |
| H  | -0.88010700 | -0.07515100 | 3.84696400  |
| H  | 0.87827600  | -2.22752200 | 2.46670400  |
| H  | -0.87690600 | -2.22742000 | 2.46724700  |
| La | -0.00004100 | -0.56504300 | 0.23503200  |

### Sc\_1\_II'

E(B3LYP/BS1) = -893.072056 au

H(B3LYP/BS1) = -892.686400 au

G(B3LYP/BS1) = -892.765848 au

E(B3LYP/BS2//B3LYP/BS1, solvent = dichloromethane) = -1607.649302 au

E(M06/BS2//B3LYP/BS1, solvent = dichloromethane) = -1606.929938 au

|   |             |             |             |
|---|-------------|-------------|-------------|
| C | 1.23635600  | 2.30440100  | -0.98487200 |
| C | -1.23606700 | 2.30462800  | -0.98484700 |
| C | 0.00019100  | 2.90235700  | -1.23993200 |
| H | -2.13200400 | 2.91929500  | -1.09077200 |
| H | 0.00029100  | 3.92885100  | -1.58654400 |
| H | 2.13237600  | 2.91894000  | -1.09085400 |
| C | -0.00010200 | -1.97369700 | 2.00011400  |
| C | 0.00051000  | -0.64250800 | 2.20928500  |
| N | -1.41008600 | 1.03747000  | -0.60040100 |
| N | 1.41023200  | 1.03723500  | -0.60041000 |
| C | -2.65945900 | 0.58926300  | -0.09506900 |
| C | -3.12381400 | -0.68066400 | -0.48782400 |
| C | -3.38389500 | 1.32338700  | 0.86112400  |
| C | -4.29437500 | -1.20552400 | 0.07002900  |
| H | -2.62853500 | -1.21099900 | -1.29991100 |
| C | -4.55945800 | 0.79907100  | 1.39414800  |
| H | -3.01367800 | 2.29038000  | 1.18982500  |
| C | -5.01431200 | -0.46749800 | 1.00866700  |
| H | -4.65458400 | -2.17726100 | -0.25453800 |

|    |             |             |             |
|----|-------------|-------------|-------------|
| H  | -5.11897400 | 1.37703700  | 2.12381000  |
| H  | -5.92825200 | -0.86981900 | 1.43412600  |
| C  | 2.65962500  | 0.58895600  | -0.09518900 |
| C  | 3.38439900  | 1.32323500  | 0.86061900  |
| C  | 3.12372700  | -0.68116400 | -0.48767200 |
| C  | 4.55998100  | 0.79886900  | 1.39357800  |
| H  | 3.01443300  | 2.29038000  | 1.18914000  |
| C  | 4.29429200  | -1.20606400 | 0.07011500  |
| H  | 2.62827200  | -1.21162000 | -1.29956200 |
| C  | 5.01453000  | -0.46789200 | 1.00841400  |
| H  | 5.11973100  | 1.37696400  | 2.12295900  |
| H  | 4.65429200  | -2.17794600 | -0.25424500 |
| H  | 5.92848600  | -0.87024600 | 1.43380700  |
| H  | -0.92733900 | -0.08985700 | 2.34676200  |
| H  | 0.92895300  | -0.09060500 | 2.34581800  |
| H  | -0.92681900 | -2.54193900 | 1.95380800  |
| H  | 0.92615200  | -2.54262500 | 1.95290100  |
| C  | -0.00031100 | -1.65792200 | -2.27874600 |
| C  | -0.00124000 | -2.96290400 | -1.49472300 |
| H  | -0.00146600 | -2.81686700 | -0.36937500 |
| H  | -0.89005100 | -3.57788400 | -1.66420300 |
| H  | 0.88701300  | -3.57881300 | -1.66355100 |
| H  | -0.88722300 | -1.52079200 | -2.90473100 |
| H  | 0.88730800  | -1.52142100 | -2.90386800 |
| Sc | -0.00013700 | -0.51219400 | -0.46040100 |

### Y\_1\_II'

E(B3LYP/BS1) = -884.561857 au

H(B3LYP/BS1) = -884.176649 au

G(B3LYP/BS1) = -884.260321au

E(B3LYP/BS2//B3LYP/BS1, solvent = dichloromethane) = -885.286066 au

E(M06/BS2//B3LYP/BS1, solvent = dichloromethane) = -884.552035 au

|   |             |             |             |
|---|-------------|-------------|-------------|
| C | -1.27009200 | 2.60361800  | 0.28195800  |
| C | 1.20377900  | 2.61705700  | 0.22654200  |
| C | -0.03452400 | 3.25410700  | 0.34981000  |
| H | 2.09125500  | 3.24572600  | 0.12275700  |
| H | -0.03917800 | 4.33629900  | 0.40308500  |
| H | -2.16734100 | 3.22330500  | 0.21413700  |
| C | -0.01869100 | -3.00832500 | -1.18409000 |
| C | -0.04542300 | -2.03481300 | -2.11090500 |
| N | 1.38230900  | 1.29617400  | 0.20602600  |
| N | -1.43691100 | 1.28068600  | 0.27155200  |
| C | 2.58397800  | 0.70116100  | -0.23862100 |
| C | 3.02963200  | -0.45470900 | 0.43994700  |
| C | 3.26004900  | 1.11692600  | -1.40221900 |
| C | 4.12954700  | -1.17762600 | -0.04079200 |
| H | 2.60410300  | -0.70632200 | 1.41262800  |
| C | 4.36437700  | 0.40077300  | -1.85657400 |
| H | 2.90422200  | 1.98711200  | -1.94637100 |
| C | 4.79618400  | -0.75300300 | -1.18839200 |
| H | 4.48002800  | -2.04784200 | 0.50650800  |
| H | 4.88733900  | 0.73634600  | -2.74746300 |
| H | 5.65501700  | -1.30497500 | -1.55693100 |
| C | -2.64781600 | 0.67813300  | -0.13700100 |
| C | -3.36933300 | 1.10203900  | -1.27019300 |

|   |             |             |             |
|---|-------------|-------------|-------------|
| C | -3.05938900 | -0.49053400 | 0.54096500  |
| C | -4.48362900 | 0.38243500  | -1.69366700 |
| H | -3.04038400 | 1.98141600  | -1.81643600 |
| C | -4.17010100 | -1.21669400 | 0.09115100  |
| H | -2.59864600 | -0.75185100 | 1.49470600  |
| C | -4.88181000 | -0.78334600 | -1.02566000 |
| H | -5.04094100 | 0.72501900  | -2.56074900 |
| H | -4.49314900 | -2.09687100 | 0.63942400  |
| H | -5.74891200 | -1.33795500 | -1.37005600 |
| H | 0.87022000  | -1.63991900 | -2.54901600 |
| H | -0.98395900 | -1.65546100 | -2.51278000 |
| H | 0.91918500  | -3.43847100 | -0.83588600 |
| H | -0.93458000 | -3.45473600 | -0.79937300 |
| C | 0.08494400  | -1.28784800 | 2.57849900  |
| C | 0.48831800  | -0.41928800 | 3.78219900  |
| H | 0.52220400  | -0.98780200 | 4.72120000  |
| H | 1.47932600  | 0.03259800  | 3.64606600  |
| H | -0.21956700 | 0.40515500  | 3.93092900  |
| H | 0.79167800  | -2.14030200 | 2.47804300  |
| H | -0.89035600 | -1.76867500 | 2.78418900  |
| Y | -0.01090600 | -0.48103000 | 0.41386200  |

**TS'**<sub>Al-1</sub>

E(B3LYP/BS1) = -848.555557 au

H(B3LYP/BS1) = -848.167918 au

G(B3LYP/BS1) = -848.242110 au

E(B3LYP/BS2//B3LYP/BS1, solvent = dichloromethane) = -1089.329616 au

E(M06/BS2//B3LYP/BS1, solvent = dichloromethane) = -1088.627312 au

|    |             |             |             |
|----|-------------|-------------|-------------|
| C  | -1.15888200 | 2.32022000  | 0.05833500  |
| C  | 1.32335300  | 2.27023800  | 0.08892000  |
| C  | 0.09368000  | 2.92442000  | 0.18256500  |
| H  | 2.22682200  | 2.86771600  | 0.21006300  |
| H  | 0.11355400  | 3.99272900  | 0.35849900  |
| H  | -2.04183900 | 2.95055100  | 0.16436000  |
| C  | -0.16118500 | -2.44699100 | -0.50729700 |
| C  | -0.00391800 | -1.66718200 | -1.70480100 |
| Al | 0.04049300  | -0.21178800 | -0.30081400 |
| C  | 0.09211700  | -1.40152000 | 1.47216600  |
| H  | 1.16507100  | -1.54665800 | 1.64279700  |
| H  | -0.16171000 | -0.40519700 | 1.88986600  |
| H  | -1.15340800 | -2.77253600 | -0.20871900 |
| H  | 0.64806200  | -3.07192600 | -0.14242100 |
| N  | 1.51684700  | 0.96455300  | -0.14548300 |
| N  | -1.39205300 | 1.02444000  | -0.18884500 |
| C  | -2.75929600 | 0.56159300  | -0.18336800 |
| C  | -3.52599500 | 0.65097700  | 0.98561700  |
| C  | -3.30948200 | 0.00554000  | -1.34474400 |
| C  | -4.84225100 | 0.18602100  | 0.98724000  |
| H  | -3.09014300 | 1.07498600  | 1.88617900  |
| C  | -4.62508000 | -0.46117200 | -1.33204700 |
| H  | -2.72600800 | -0.01941100 | -2.26052500 |
| C  | -5.39209400 | -0.37370000 | -0.16801100 |
| H  | -5.43519700 | 0.25970400  | 1.89392400  |
| H  | -5.05402600 | -0.87900300 | -2.23788200 |
| H  | -6.41568100 | -0.73530500 | -0.16298400 |



|   |             |             |             |
|---|-------------|-------------|-------------|
| C | 2.87027900  | 0.46235600  | -0.12339600 |
| C | 3.64181800  | 0.57150300  | 1.04040900  |
| C | 3.40251900  | -0.14634500 | -1.26634600 |
| C | 4.94614400  | 0.07465100  | 1.05466000  |
| H | 3.21798600  | 1.03254400  | 1.92836100  |
| C | 4.70593000  | -0.64537700 | -1.24053700 |
| H | 2.81547100  | -0.18891800 | -2.17918800 |
| C | 5.47867400  | -0.53707300 | -0.08210200 |
| H | 5.54262000  | 0.16242700  | 1.95774900  |
| H | 5.12127400  | -1.10497100 | -2.13237000 |
| H | 6.49280700  | -0.92410900 | -0.06685900 |
| H | -0.88559800 | -1.57745400 | -2.33716800 |
| H | 0.93643300  | -1.78057800 | -2.24096900 |
| C | -0.74759700 | -2.42263300 | 2.23969900  |
| H | -0.55750300 | -2.34539800 | 3.31609000  |
| H | -1.81965500 | -2.26022200 | 2.08239200  |
| H | -0.51170800 | -3.45184700 | 1.94792500  |

### TS' <sub>Ga-1</sub>

E(B3LYP/BS1) = -848.584996 au

H(B3LYP/BS1) = -848.197631 au

G(B3LYP/BS1) = -848.272439 au

E(B3LYP/BS2//B3LYP/BS1, solvent = dichloromethane) = -2771.723150 au

E(M06/BS2//B3LYP/BS1, solvent = dichloromethane) = -2770.963443 au

|   |             |             |             |
|---|-------------|-------------|-------------|
| C | -1.17191700 | 2.31097300  | 0.08662600  |
| C | 1.32029100  | 2.26653900  | 0.12315000  |
| C | 0.08334800  | 2.90664300  | 0.23274600  |
| H | 2.21604200  | 2.87568400  | 0.24321600  |
| H | 0.09993800  | 3.97230500  | 0.42467800  |
| H | -2.04981800 | 2.94926300  | 0.18628700  |
| C | -0.13679600 | -2.45694000 | -0.23487700 |
| C | 0.00780300  | -1.79407100 | -1.51048700 |
| C | 0.09820700  | -1.25303400 | 1.68950100  |
| H | 1.16174000  | -1.44282000 | 1.86349100  |
| H | -0.10505500 | -0.22531100 | 2.03951500  |
| H | -1.12534500 | -2.76220600 | 0.09357300  |
| H | 0.68287300  | -3.03060500 | 0.18557400  |
| N | 1.53440500  | 0.97056000  | -0.13279800 |
| N | -1.41921800 | 1.02409900  | -0.18230700 |
| C | -2.78519500 | 0.56832400  | -0.21262100 |
| C | -3.60384900 | 0.71961800  | 0.91404000  |
| C | -3.28635600 | -0.04083100 | -1.36972800 |
| C | -4.92312700 | 0.26481500  | 0.87664900  |
| H | -3.20542600 | 1.18011600  | 1.81394600  |
| C | -4.60492800 | -0.49744000 | -1.39539000 |
| H | -2.66153100 | -0.11440800 | -2.25525000 |
| C | -5.42439000 | -0.34704200 | -0.27408500 |
| H | -5.55592100 | 0.38563100  | 1.75075400  |
| H | -4.99537300 | -0.95660700 | -2.29862700 |
| H | -6.45025600 | -0.70124500 | -0.29891600 |
| C | 2.88830900  | 0.47800100  | -0.13944500 |
| C | 3.70016100  | 0.63148500  | 0.99147400  |
| C | 3.38446700  | -0.16427600 | -1.28047300 |
| C | 5.00911700  | 0.14696900  | 0.97373300  |
| H | 3.30389800  | 1.11484000  | 1.88022400  |

|    |             |             |             |
|----|-------------|-------------|-------------|
| C  | 4.69239800  | -0.65084000 | -1.28615500 |
| H  | 2.76455200  | -0.24271200 | -2.16899600 |
| C  | 5.50606200  | -0.49708800 | -0.16107300 |
| H  | 5.63662000  | 0.26858100  | 1.85151600  |
| H  | 5.07946100  | -1.13639200 | -2.17695800 |
| H  | 6.52375400  | -0.87483300 | -0.17033600 |
| H  | -0.87661100 | -1.78359000 | -2.14447500 |
| H  | 0.94867100  | -1.94715500 | -2.03475800 |
| Ga | 0.03796700  | -0.21286400 | -0.25193900 |
| C  | -0.80042100 | -2.19148700 | 2.49161300  |
| H  | -0.63071300 | -2.05186400 | 3.56572400  |
| H  | -1.86155400 | -1.99565400 | 2.30030100  |
| H  | -0.60232500 | -3.24676500 | 2.27417600  |

**TS'<sub>In-1</sub>**

E(B3LYP/BS1) = -848.379111 au

H(B3LYP/BS1) = -847.992794 au

G(B3LYP/BS1) = -848.069495 au

E(B3LYP/BS2//B3LYP/BS1, solvent = dichloromethane) = -1036.986709 au

E(M06/BS2//B3LYP/BS1, solvent = dichloromethane) = -1036.310868 au

|   |             |             |             |
|---|-------------|-------------|-------------|
| C | 1.21528600  | -2.39629700 | 0.00281500  |
| C | -1.30697100 | -2.36756100 | 0.02533200  |
| C | -0.05193300 | -2.98233200 | 0.08617900  |
| H | -2.17481800 | -3.01987900 | 0.12942000  |
| H | -0.06316200 | -4.05837700 | 0.21288700  |
| H | 2.07006000  | -3.06768000 | 0.09307400  |
| C | 0.05616300  | 2.70000700  | -0.27448700 |
| C | -0.01240800 | 2.07894900  | -1.57866400 |
| C | -0.13155500 | 1.50330000  | 1.72034100  |
| H | -1.21559800 | 1.53075300  | 1.87541500  |
| H | 0.23470600  | 0.53623800  | 2.10972500  |
| H | 1.01098000  | 3.06393900  | 0.09059300  |
| H | -0.81268200 | 3.20585700  | 0.13395100  |
| N | -1.58316300 | -1.07244300 | -0.15905600 |
| N | 1.51626600  | -1.10751400 | -0.18801400 |
| C | 2.89033600  | -0.69550300 | -0.13802700 |
| C | 3.71855000  | -1.08557100 | 0.92317700  |
| C | 3.39700600  | 0.12798700  | -1.15243300 |
| C | 5.04820100  | -0.66302700 | 0.95607600  |
| H | 3.31787200  | -1.69698100 | 1.72680700  |
| C | 4.72548100  | 0.55165400  | -1.10743900 |
| H | 2.76729500  | 0.39317300  | -1.99844900 |
| C | 5.55426200  | 0.15682400  | -0.05456900 |
| H | 5.68494300  | -0.96791200 | 1.78115800  |
| H | 5.11622100  | 1.17693900  | -1.90464600 |
| H | 6.58807700  | 0.48625200  | -0.02242200 |
| C | -2.94861300 | -0.63334500 | -0.09169400 |
| C | -3.76539400 | -0.99558300 | 0.98793100  |
| C | -3.45712500 | 0.18585600  | -1.10839500 |
| C | -5.08689100 | -0.54941800 | 1.03711100  |
| H | -3.36175100 | -1.60419800 | 1.79218800  |
| C | -4.77720500 | 0.63306000  | -1.04713300 |
| H | -2.83594500 | 0.43120600  | -1.96652000 |
| C | -5.59518300 | 0.26613700  | 0.02418200  |
| H | -5.71509100 | -0.83257000 | 1.87635600  |

|    |             |            |             |
|----|-------------|------------|-------------|
| H  | -5.17013800 | 1.25529700 | -1.84563900 |
| H  | -6.62243700 | 0.61412000 | 0.06888900  |
| H  | 0.89174400  | 2.13263900 | -2.18270000 |
| H  | -0.93983500 | 2.20828000 | -2.13315300 |
| In | -0.01963300 | 0.28924800 | -0.32203000 |
| C  | 0.58599700  | 2.60419900 | 2.49567900  |
| H  | 0.40168800  | 2.49230500 | 3.57099300  |
| H  | 1.67113500  | 2.56532600 | 2.34714500  |
| H  | 0.23902700  | 3.60577600 | 2.21801600  |

**TS' La-1**

E(B3LYP/BS1) = -877.825080 au

H(B3LYP/BS1) = -877.441524 au

G(B3LYP/BS1) = -877.521499 au

E(B3LYP/BS2//B3LYP/BS1, solvent = dichloromethane) = -878.525531 au

E(M06/BS2//B3LYP/BS1, solvent = dichloromethane) = -877.795641 au

|   |             |             |             |
|---|-------------|-------------|-------------|
| C | 1.24535100  | -2.94949500 | -0.20572800 |
| C | -1.24813600 | -2.94887700 | -0.20549600 |
| C | -0.00153400 | -3.58412700 | -0.21005400 |
| H | -2.13054200 | -3.58894400 | -0.12031000 |
| H | -0.00178700 | -4.66716600 | -0.16999000 |
| H | 2.12743700  | -3.59001800 | -0.12069000 |
| C | 0.00324200  | 3.22702300  | -0.88234300 |
| C | 0.00175600  | 2.38471700  | -1.99477500 |
| C | 0.00135700  | 2.33757600  | 1.30288500  |
| H | -0.90037500 | 1.77697600  | 1.64776300  |
| H | 0.89808900  | 1.77053000  | 1.65057900  |
| H | 0.91775000  | 3.72129100  | -0.57228000 |
| H | -0.90972200 | 3.72395800  | -0.57199500 |
| N | -1.45376500 | -1.63633300 | -0.30134900 |
| N | 1.45176700  | -1.63702800 | -0.30161500 |
| C | 2.71819200  | -1.06621700 | -0.05188500 |
| C | 3.50638100  | -1.40155300 | 1.06649500  |
| C | 3.13493200  | -0.00289500 | -0.88412100 |
| C | 4.68444100  | -0.70423200 | 1.32467700  |
| H | 3.17989600  | -2.19630600 | 1.73124200  |
| C | 4.31329900  | 0.70129700  | -0.60506700 |
| H | 2.61218600  | 0.17921100  | -1.82536600 |
| C | 5.08761300  | 0.35393400  | 0.50046900  |
| H | 5.28901600  | -0.98000800 | 2.18387700  |
| H | 4.63501100  | 1.49626100  | -1.27150100 |
| H | 6.00439500  | 0.89329200  | 0.71616300  |
| C | -2.71971900 | -1.06457300 | -0.05161100 |
| C | -3.50828700 | -1.39936000 | 1.06666300  |
| C | -3.13545400 | -0.00073000 | -0.88371700 |
| C | -4.68573200 | -0.70100800 | 1.32486600  |
| H | -3.18255600 | -2.19449100 | 1.73132600  |
| C | -4.31321600 | 0.70447500  | -0.60464700 |
| H | -2.61258100 | 0.18095400  | -1.82498800 |
| C | -5.08790300 | 0.35765000  | 0.50079600  |
| H | -5.29061200 | -0.97636600 | 2.18398500  |
| H | -4.63418300 | 1.49981200  | -1.27099600 |
| H | -6.00421000 | 0.89780200  | 0.71651900  |
| H | 0.92253300  | 2.25499700  | -2.56521800 |
| H | -0.91975400 | 2.25758000  | -2.56462500 |

|    |             |            |             |
|----|-------------|------------|-------------|
| La | -0.00033400 | 0.36162800 | -0.29519100 |
| C  | 0.00557300  | 3.70002900 | 1.97643000  |
| H  | 0.00435100  | 3.61723000 | 3.07026700  |
| H  | 0.89317300  | 4.27801800 | 1.69564000  |
| H  | -0.87742800 | 4.28429900 | 1.69420000  |

**TS'<sub>Sc-1</sub>**

E(B3LYP/BS1) = -893.056346 au

H(B3LYP/BS1) = -892.671440 au

G(B3LYP/BS1) = -892.749099 au

E(B3LYP/BS2//B3LYP/BS1, solvent = dichloromethane) = -1607.637527 au

E(M06/BS2//B3LYP/BS1, solvent = dichloromethane) = -1606.916090 au

|    |             |             |             |
|----|-------------|-------------|-------------|
| C  | -1.24995500 | -2.32766700 | 0.81883200  |
| C  | 1.25020700  | -2.32766200 | 0.81881200  |
| C  | 0.00012800  | -2.90329700 | 1.06792200  |
| H  | 2.12442800  | -2.97147500 | 0.93406300  |
| H  | 0.00013100  | -3.92946600 | 1.41667700  |
| H  | -2.12416300 | -2.97149700 | 0.93408300  |
| C  | -0.00062700 | 2.79278700  | 1.40393200  |
| C  | -0.00046100 | 1.75736000  | 2.32668100  |
| C  | -0.00007300 | 2.11895200  | -0.89207100 |
| H  | 0.90232200  | 1.57008300  | -1.25542600 |
| H  | -0.90218600 | 1.56969300  | -1.25555200 |
| H  | -0.91643200 | 3.31937600  | 1.15562500  |
| H  | 0.91494400  | 3.31996700  | 1.15603100  |
| N  | 1.48359200  | -1.06688000 | 0.43106500  |
| N  | -1.48338700 | -1.06687800 | 0.43111400  |
| C  | -2.78783500 | -0.71412200 | -0.03318400 |
| C  | -3.44785900 | -1.48083800 | -1.00609700 |
| C  | -3.39145400 | 0.45739900  | 0.45222600  |
| C  | -4.69971500 | -1.08206700 | -1.47269600 |
| H  | -2.96873700 | -2.36962200 | -1.40678400 |
| C  | -4.63948000 | 0.85635900  | -0.03021500 |
| H  | -2.91575400 | 1.02116900  | 1.25337700  |
| C  | -5.29663200 | 0.08688700  | -0.99167700 |
| H  | -5.20585600 | -1.68187700 | -2.22322300 |
| H  | -5.10513200 | 1.75583200  | 0.36143000  |
| H  | -6.26947700 | 0.39381300  | -1.36264700 |
| C  | 2.78802500  | -0.71401600 | -0.03317100 |
| C  | 3.44819500  | -1.48067000 | -1.00603200 |
| C  | 3.39146900  | 0.45759500  | 0.45224500  |
| C  | 4.70002400  | -1.08174600 | -1.47257200 |
| H  | 2.96920700  | -2.36952300 | -1.40672600 |
| C  | 4.63946500  | 0.85671100  | -0.03014200 |
| H  | 2.91565800  | 1.02131100  | 1.25337600  |
| C  | 5.29676400  | 0.08729900  | -0.99155100 |
| H  | 5.20628400  | -1.68150700 | -2.22305800 |
| H  | 5.10498100  | 1.75625300  | 0.36150500  |
| H  | 6.26958900  | 0.39434100  | -1.36248000 |
| H  | -0.92319500 | 1.47989500  | 2.83797800  |
| H  | 0.92227300  | 1.48049000  | 2.83830200  |
| Sc | 0.00010100  | 0.42116100  | 0.43927800  |
| C  | -0.00036700 | 3.52491800  | -1.45586500 |
| H  | -0.00115900 | 3.51897400  | -2.55257800 |
| H  | -0.88718700 | 4.08036600  | -1.13254300 |

H 0.88698800 4.08022600 -1.13380900

**TS'<sub>Y-1</sub>**

E(B3LYP/BS1) = -884.543937 au

H(B3LYP/BS1) = -884.159893 au

G(B3LYP/BS1) = -884.238814 au

E(B3LYP/BS2//B3LYP/BS1, solvent = dichloromethane) = -885.264635 au

E(M06/BS2//B3LYP/BS1, solvent = dichloromethane) = -884.533415 au

|   |             |             |             |
|---|-------------|-------------|-------------|
| C | 1.24572400  | -2.73210800 | -0.41669500 |
| C | -1.24530100 | -2.73212800 | -0.41669900 |
| C | 0.00021700  | -3.36196900 | -0.50275300 |
| H | -2.12843300 | -3.37481000 | -0.38622100 |
| H | 0.00022100  | -4.44276500 | -0.58221400 |
| H | 2.12887700  | -3.37476300 | -0.38619100 |
| C | -0.00063700 | 2.98326600  | -1.10831600 |
| C | -0.00026800 | 2.07025900  | -2.15752500 |
| C | -0.00026300 | 2.13617200  | 1.14358400  |
| H | -0.90090200 | 1.56993300  | 1.48905400  |
| H | 0.90108700  | 1.57090400  | 1.48875200  |
| H | 0.91407900  | 3.48293600  | -0.80732500 |
| H | -0.91574300 | 3.48226100  | -0.80738100 |
| N | -1.45318200 | -1.41458200 | -0.36144300 |
| N | 1.45353100  | -1.41455700 | -0.36147700 |
| C | 2.73096900  | -0.89336000 | -0.02737300 |
| C | 3.47825900  | -1.36523400 | 1.06695500  |
| C | 3.20190800  | 0.21985400  | -0.75155600 |
| C | 4.67501500  | -0.74115100 | 1.41220300  |
| H | 3.10623600  | -2.20357000 | 1.64900900  |
| C | 4.39608500  | 0.85052400  | -0.38504900 |
| H | 2.69123200  | 0.52334700  | -1.66605100 |
| C | 5.13338500  | 0.37166600  | 0.69698100  |
| H | 5.24920900  | -1.11744500 | 2.25376900  |
| H | 4.75940900  | 1.69360100  | -0.96519500 |
| H | 6.06396600  | 0.85392600  | 0.97893000  |
| C | -2.73070900 | -0.89355000 | -0.02735800 |
| C | -3.47785100 | -1.36545300 | 1.06705800  |
| C | -3.20192600 | 0.21945200  | -0.75167200 |
| C | -4.67474000 | -0.74160300 | 1.41227000  |
| H | -3.10561600 | -2.20363500 | 1.64920000  |
| C | -4.39623500 | 0.84989100  | -0.38520900 |
| H | -2.69131200 | 0.52297600  | -1.66618600 |
| C | -5.13339100 | 0.37100800  | 0.69691100  |
| H | -5.24881600 | -1.11791800 | 2.25390600  |
| H | -4.75977300 | 1.69280900  | -0.96545300 |
| H | -6.06407500 | 0.85309100  | 0.97882300  |
| H | 0.92124800  | 1.88713700  | -2.71123400 |
| H | -0.92158400 | 1.88650500  | -2.71135800 |
| Y | 0.00014200  | 0.34669000  | -0.36234900 |
| C | -0.00091600 | 3.50445900  | 1.79972900  |
| H | -0.00069800 | 3.43839500  | 2.89450600  |
| H | 0.88455400  | 4.08057500  | 1.50885800  |
| H | -0.88711700 | 4.07959400  | 1.50913900  |

**TS'<sub>AI-1 (BHT)</sub>**

E(B3LYP/BS1) = -848.571835 au

H(B3LYP/BS1) = -848.187675 au  
 G(B3LYP/BS1) = -848.260879 au  
 E(B3LYP/BS2//B3LYP/BS1, solvent = dichloromethane) = -1089.343946 au  
 E(M06/BS2//B3LYP/BS1, solvent = dichloromethane) = -1088.634106 au

|    |             |             |             |
|----|-------------|-------------|-------------|
| C  | -1.23370200 | -2.37955500 | -0.08993400 |
| C  | 1.23514300  | -2.37918100 | 0.08747500  |
| C  | 0.00085100  | -3.02204000 | -0.00170700 |
| H  | 2.12916000  | -3.00105300 | 0.13324600  |
| H  | 0.00106900  | -4.10503400 | -0.00242100 |
| H  | -2.12747400 | -3.00172700 | -0.13637100 |
| N  | 1.43433500  | -1.05529900 | 0.13517400  |
| N  | -1.43339800 | -1.05569500 | -0.13594700 |
| C  | 2.79445300  | -0.58321500 | 0.11775700  |
| C  | 3.67159600  | -0.98814900 | -0.89827400 |
| C  | 3.23481600  | 0.31102600  | 1.10183300  |
| C  | 4.98220000  | -0.50968800 | -0.91723200 |
| H  | 3.32188600  | -1.66075900 | -1.67666400 |
| C  | 4.54567700  | 0.78989800  | 1.07175200  |
| H  | 2.57034700  | 0.59263600  | 1.91361600  |
| C  | 5.42191000  | 0.38119900  | 0.06425400  |
| H  | 5.65663200  | -0.82907400 | -1.70610600 |
| H  | 4.88555500  | 1.46988400  | 1.84732400  |
| H  | 6.44173000  | 0.75280300  | 0.04537000  |
| C  | -2.79359900 | -0.58402200 | -0.11751900 |
| C  | -3.67080100 | -0.99153100 | 0.89743700  |
| C  | -3.23402300 | 0.31257700  | -1.09943700 |
| C  | -4.98150400 | -0.51338800 | 0.91736800  |
| H  | -3.32106700 | -1.66584100 | 1.67434200  |
| C  | -4.54497900 | 0.79112000  | -1.06837000 |
| H  | -2.56950100 | 0.59631700  | -1.91043800 |
| C  | -5.42128400 | 0.37978100  | -0.06200800 |
| H  | -5.65595400 | -0.83479700 | 1.70540500  |
| H  | -4.88488100 | 1.47293200  | -1.84232900 |
| H  | -6.44118100 | 0.75113000  | -0.04235900 |
| Al | 0.00030900  | 0.21638200  | -0.00013400 |
| C  | -0.39539200 | 1.52109900  | 1.56929700  |
| C  | 0.39520100  | 1.52127900  | -1.56948600 |
| H  | -1.40290800 | 1.18568800  | 1.83490000  |
| H  | 0.33414500  | 1.20363700  | 2.32024100  |
| H  | 1.40455300  | 1.18962500  | -1.83279700 |
| C  | -0.32710900 | 2.93464600  | 1.26360200  |
| H  | -0.33150300 | 1.20024100  | -2.32169000 |
| C  | 0.32060300  | 2.93485900  | -1.26521800 |
| H  | -0.00380900 | 3.06884500  | -0.00107200 |
| H  | 1.25287800  | 3.49995500  | -1.22303000 |
| H  | -0.50785600 | 3.50941200  | -1.68212900 |
| H  | -1.26186800 | 3.49560800  | 1.22129500  |
| H  | 0.49913100  | 3.51326700  | 1.67928000  |

**TS'**<sub>Ga-1 (BHT)</sub>

E(B3LYP/BS1) = -848.610470 au  
 H(B3LYP/BS1) = -848.226561 au  
 G(B3LYP/BS1) = -848.300362 au  
 E(B3LYP/BS2//B3LYP/BS1, solvent = dichloromethane) = -2771.752809 au  
 E(M06/BS2//B3LYP/BS1, solvent = dichloromethane) = -2770.985277 au

|    |             |             |             |
|----|-------------|-------------|-------------|
| C  | 1.23774800  | -2.39754800 | 0.09174900  |
| C  | -1.23738200 | -2.39766400 | -0.09192700 |
| C  | 0.00021400  | -3.03474000 | -0.00011000 |
| H  | -2.12609900 | -3.02676700 | -0.14303800 |
| H  | 0.00026900  | -4.11779500 | -0.00014000 |
| H  | 2.12652000  | -3.02657100 | 0.14285000  |
| N  | -1.45021200 | -1.07763700 | -0.13710400 |
| N  | 1.45046800  | -1.07750300 | 0.13699400  |
| C  | -2.80968600 | -0.61110600 | -0.11824800 |
| C  | -3.69530700 | -1.04653400 | 0.87777400  |
| C  | -3.24432400 | 0.30864200  | -1.08142500 |
| C  | -5.00816000 | -0.57403900 | 0.89624800  |
| H  | -3.35056300 | -1.73698100 | 1.64255700  |
| C  | -4.55718300 | 0.78099600  | -1.05187400 |
| H  | -2.57225500 | 0.61631700  | -1.87742400 |
| C  | -5.44211600 | 0.34108200  | -0.06506400 |
| H  | -5.68860900 | -0.91678700 | 1.67001400  |
| H  | -4.89203100 | 1.48091000  | -1.81176700 |
| H  | -6.46361400 | 0.70803400  | -0.04637200 |
| C  | 2.80990900  | -0.61086500 | 0.11821500  |
| C  | 3.69557900  | -1.04611400 | -0.87784000 |
| C  | 3.24446900  | 0.30880100  | 1.08150200  |
| C  | 5.00841100  | -0.57355200 | -0.89621600 |
| H  | 3.35090100  | -1.73647100 | -1.64273600 |
| C  | 4.55730500  | 0.78122300  | 1.05204900  |
| H  | 2.57235200  | 0.61638100  | 1.87749600  |
| C  | 5.44229800  | 0.34146900  | 0.06522200  |
| H  | 5.68889500  | -0.91617400 | -1.67000700 |
| H  | 4.89208500  | 1.48107300  | 1.81203200  |
| H  | 6.46377700  | 0.70847200  | 0.04660900  |
| C  | 0.40800300  | 1.51675500  | -1.58299800 |
| C  | -0.40814800 | 1.51653600  | 1.58310300  |
| H  | 1.41765800  | 1.18106400  | -1.83454100 |
| H  | -0.32009600 | 1.18987500  | -2.32963200 |
| H  | -1.41735300 | 1.17991400  | 1.83522200  |
| C  | 0.32672300  | 2.92527400  | -1.26642100 |
| H  | 0.32062100  | 1.19050900  | 2.32945000  |
| C  | -0.32845800 | 2.92511200  | 1.26629400  |
| H  | -0.00106500 | 3.04511900  | -0.00006100 |
| H  | -1.25952100 | 3.49146700  | 1.21879600  |
| H  | 0.50143100  | 3.49922200  | 1.68053400  |
| H  | 1.25714600  | 3.49266400  | -1.21875500 |
| H  | -0.50372300 | 3.49841900  | -1.68087700 |
| Ga | 0.00006800  | 0.20844300  | 0.00001200  |

**TS<sub>In-1</sub> (BHT)**

E(B3LYP/BS1) = -848.409792 au

H(B3LYP/BS1) = -848.026593 au

G(B3LYP/BS1) = -848.102666 au

E(B3LYP/BS2//B3LYP/BS1, solvent = dichloromethane) = -1037.024973 au

E(M06/BS2//B3LYP/BS1, solvent = dichloromethane) = -1036.340924 au

|   |             |             |             |
|---|-------------|-------------|-------------|
| C | -1.25563300 | -2.37489200 | -0.64232300 |
| C | 1.25554600  | -2.37491900 | -0.64232700 |
| C | -0.00005100 | -2.96493900 | -0.80937300 |
| H | 2.12049300  | -3.03322900 | -0.73670600 |

|    |             |             |             |
|----|-------------|-------------|-------------|
| H  | -0.00006200 | -4.01957700 | -1.05838300 |
| H  | -2.12059600 | -3.03318300 | -0.73669600 |
| N  | 1.52854700  | -1.09291500 | -0.37897000 |
| N  | -1.52860700 | -1.09288100 | -0.37896700 |
| C  | 2.88726300  | -0.74051000 | -0.08005000 |
| C  | 3.47887800  | 0.35347600  | -0.72646500 |
| C  | 3.62064200  | -1.45912000 | 0.87522500  |
| C  | 4.79169000  | 0.71829700  | -0.42606700 |
| H  | 2.93020100  | 0.88573300  | -1.49917100 |
| C  | 4.93515700  | -1.09208200 | 1.16561200  |
| H  | 3.15469500  | -2.28718600 | 1.40200700  |
| C  | 5.52374500  | -0.00313400 | 0.51950800  |
| H  | 5.24723300  | 1.55684200  | -0.94456400 |
| H  | 5.49531700  | -1.65441800 | 1.90678600  |
| H  | 6.54571400  | 0.28100200  | 0.75032600  |
| C  | -2.88731600 | -0.74044900 | -0.08004400 |
| C  | -3.62069600 | -1.45902900 | 0.87525200  |
| C  | -3.47892100 | 0.35352900  | -0.72648100 |
| C  | -4.93520400 | -1.09196900 | 1.16564100  |
| H  | -3.15475500 | -2.28709100 | 1.40204700  |
| C  | -4.79172700 | 0.71837300  | -0.42608000 |
| H  | -2.93024200 | 0.88576300  | -1.49920200 |
| C  | -5.52378400 | -0.00302800 | 0.51951700  |
| H  | -5.49536600 | -1.65428100 | 1.90683100  |
| H  | -5.24726300 | 1.55691300  | -0.94459100 |
| H  | -6.54574700 | 0.28112600  | 0.75033600  |
| C  | 0.00003800  | 1.48078200  | 1.80945800  |
| C  | 0.00003500  | 2.13134100  | -1.57769100 |
| H  | -0.90700000 | 1.06984300  | 2.25957700  |
| H  | 0.90701300  | 1.06966600  | 2.25954700  |
| H  | 0.90458700  | 1.91038500  | -2.14756200 |
| C  | 0.00017900  | 2.91847100  | 1.66820500  |
| H  | -0.90462500 | 1.91060700  | -2.14747400 |
| C  | 0.00022800  | 3.41187000  | -0.92321300 |
| H  | 0.00001800  | 3.23175400  | 0.40230900  |
| H  | 0.91167700  | 4.00916500  | -0.96648200 |
| H  | -0.91097700 | 4.00952900  | -0.96664200 |
| H  | -0.90975100 | 3.45179800  | 1.94786800  |
| H  | 0.91028900  | 3.45159400  | 1.94766600  |
| In | -0.00001700 | 0.34725300  | -0.14718500 |

**TS'**<sub>La-1 (BHT)</sub>

E(B3LYP/BS1) = -877.818108 au

H(B3LYP/BS1) = -877.437998 au

G(B3LYP/BS1) = -877.516108 au

E(B3LYP/BS2//B3LYP/BS1, solvent = dichloromethane) = -878.508365 au

E(M06/BS2//B3LYP/BS1, solvent = dichloromethane) = -877.774209 au

|   |             |            |             |
|---|-------------|------------|-------------|
| C | 1.24448800  | 2.75943700 | -0.70163900 |
| C | -1.24519000 | 2.75939800 | -0.70152800 |
| C | -0.00035900 | 3.37759000 | -0.85619300 |
| H | -2.12819600 | 3.40264500 | -0.74383100 |
| H | -0.00037500 | 4.44312100 | -1.05415500 |
| H | 2.12746700  | 3.40270100 | -0.74417900 |
| N | -1.44833800 | 1.45740800 | -0.50671700 |
| N | 1.44776500  | 1.45747400 | -0.50659100 |



|    |             |             |             |
|----|-------------|-------------|-------------|
| C  | -2.70970200 | 0.95963700  | -0.11442000 |
| C  | -3.14857700 | -0.25403600 | -0.68915900 |
| C  | -3.47478500 | 1.53756100  | 0.91734700  |
| C  | -4.32614400 | -0.86889400 | -0.24371400 |
| H  | -2.64721700 | -0.63931000 | -1.57907700 |
| C  | -4.65160800 | 0.92518100  | 1.34078100  |
| H  | -3.12957600 | 2.45296900  | 1.38930400  |
| C  | -5.07707600 | -0.28280300 | 0.77315100  |
| H  | -4.66662100 | -1.78504400 | -0.71761400 |
| H  | -5.23798600 | 1.38684700  | 2.12999200  |
| H  | -5.99312200 | -0.75296200 | 1.11635400  |
| C  | 2.70928400  | 0.95997100  | -0.11445300 |
| C  | 3.47429900  | 1.53800200  | 0.91730700  |
| C  | 3.14839200  | -0.25359000 | -0.68923900 |
| C  | 4.65128300  | 0.92587000  | 1.34065200  |
| H  | 3.12890500  | 2.45330500  | 1.38933200  |
| C  | 4.32611400  | -0.86821500 | -0.24387700 |
| H  | 2.64704600  | -0.63897500 | -1.57911500 |
| C  | 5.07698100  | -0.28199900 | 0.77295600  |
| H  | 5.23760400  | 1.38763300  | 2.12984900  |
| H  | 4.66675300  | -1.78428200 | -0.71782000 |
| H  | 5.99314800  | -0.75197200 | 1.11608900  |
| C  | 0.00087000  | -1.38776100 | 2.29343600  |
| C  | 0.00025400  | -2.30379000 | -2.17282800 |
| H  | 0.92187400  | -0.97995200 | 2.70910200  |
| H  | -0.92004600 | -0.98033400 | 2.70967300  |
| H  | -0.91752500 | -2.10336500 | -2.72435400 |
| C  | 0.00099600  | -2.69696300 | 1.76299400  |
| H  | 0.91763700  | -2.10248100 | -2.72469100 |
| C  | 0.00090600  | -3.29836300 | -1.17067700 |
| H  | 0.00085600  | -2.80625600 | 0.26380900  |
| H  | -0.91023000 | -3.87436400 | -1.00560300 |
| H  | 0.91267100  | -3.87345500 | -1.00589700 |
| H  | 0.91295900  | -3.28983800 | 1.84281000  |
| H  | -0.91076300 | -3.29010900 | 1.84315500  |
| La | -0.00006700 | -0.51154600 | -0.20132200 |

**TS'**<sub>sc-1</sub> (BHT)

E(B3LYP/BS1) = -893.046783 au

H(B3LYP/BS1) = -892.665165 au

G(B3LYP/BS1) = -892.739977 au

E(B3LYP/BS2//B3LYP/BS1, solvent = dichloromethane) = -1607.622315 au

E(M06/BS2//B3LYP/BS1, solvent = dichloromethane) = -1606.902412 au

|   |             |             |             |
|---|-------------|-------------|-------------|
| C | -1.23988100 | 2.27100800  | 0.95337600  |
| C | 1.23985600  | 2.27102200  | 0.95338100  |
| C | -0.00001600 | 2.85915600  | 1.21484100  |
| H | 2.12976200  | 2.89129700  | 1.07774700  |
| H | -0.00002300 | 3.87995700  | 1.57824600  |
| H | -2.12979300 | 2.89127400  | 1.07774100  |
| N | 1.43259600  | 1.01339500  | 0.54507900  |
| N | -1.43260900 | 1.01338000  | 0.54507300  |
| C | 2.70597700  | 0.60332800  | 0.06052300  |
| C | 3.21745100  | -0.64091100 | 0.47182000  |
| C | 3.41831200  | 1.36187400  | -0.88416100 |
| C | 4.42194600  | -1.11750400 | -0.05444300 |

|    |             |             |             |
|----|-------------|-------------|-------------|
| H  | 2.72262000  | -1.19453200 | 1.26824600  |
| C  | 4.62675100  | 0.88642100  | -1.38918900 |
| H  | 3.01083100  | 2.30744000  | -1.23021600 |
| C  | 5.12904800  | -0.35502900 | -0.98357200 |
| H  | 4.81702600  | -2.07075300 | 0.28422800  |
| H  | 5.17438300  | 1.48290200  | -2.11288400 |
| H  | 6.06837900  | -0.72021900 | -1.38664400 |
| C  | -2.70599100 | 0.60330800  | 0.06052000  |
| C  | -3.41832400 | 1.36184800  | -0.88416900 |
| C  | -3.21747000 | -0.64092500 | 0.47182900  |
| C  | -4.62676600 | 0.88639500  | -1.38919300 |
| H  | -3.01084000 | 2.30740900  | -1.23023300 |
| C  | -4.42196700 | -1.11751800 | -0.05442800 |
| H  | -2.72263800 | -1.19454200 | 1.26825700  |
| C  | -5.12906700 | -0.35505000 | -0.98356400 |
| H  | -5.17439600 | 1.48287100  | -2.11289400 |
| H  | -4.81704900 | -2.07076300 | 0.28425200  |
| H  | -6.06839900 | -0.72024000 | -1.38663300 |
| C  | -0.00001500 | -0.98281800 | -1.92965500 |
| C  | 0.00000700  | -1.70538200 | 2.31777800  |
| H  | -0.92477100 | -0.52854700 | -2.28215800 |
| H  | 0.92469100  | -0.52847400 | -2.28219300 |
| H  | 0.91836200  | -1.39713600 | 2.81461600  |
| C  | 0.00004800  | -2.32224600 | -1.49656700 |
| H  | -0.91839000 | -1.39720200 | 2.81457800  |
| C  | 0.00006600  | -2.82429300 | 1.46643400  |
| H  | 0.00009900  | -2.46197500 | -0.01007800 |
| H  | 0.91286500  | -3.40937000 | 1.35482200  |
| H  | -0.91268500 | -3.40942800 | 1.35475600  |
| H  | -0.91456600 | -2.90741700 | -1.59405600 |
| H  | 0.91470700  | -2.90734000 | -1.59411400 |
| Sc | 0.00000600  | -0.51279800 | 0.32781800  |

**TS'<sub>Y-1</sub> (BHT)**

E(B3LYP/BS1) = -884.536814 au

H(B3LYP/BS1) = -884.156161 au

G(B3LYP/BS1) = -884.232742 au

E(B3LYP/BS2//B3LYP/BS1, solvent = dichloromethane) = -885.248900 au

E(M06/BS2//B3LYP/BS1, solvent = dichloromethane) = -884.516831 au

|   |             |             |             |
|---|-------------|-------------|-------------|
| C | 1.24197400  | 2.55018400  | -0.82933700 |
| C | -1.24198300 | 2.55018300  | -0.82933800 |
| C | -0.00000400 | 3.15855100  | -1.03344600 |
| H | -2.12917500 | 3.18435700  | -0.89689900 |
| H | -0.00000500 | 4.20906800  | -1.29937700 |
| H | 2.12916700  | 3.18435900  | -0.89689800 |
| N | -1.43519800 | 1.26048600  | -0.54874900 |
| N | 1.43519100  | 1.26048700  | -0.54874800 |
| C | -2.68709400 | 0.78461900  | -0.09014400 |
| C | -3.13067600 | -0.46754500 | -0.56418000 |
| C | -3.43117500 | 1.43944300  | 0.90877000  |
| C | -4.29403300 | -1.05129600 | -0.04749100 |
| H | -2.63878600 | -0.92282500 | -1.42445600 |
| C | -4.59629600 | 0.85782400  | 1.40218800  |
| H | -3.07906300 | 2.38760700  | 1.30471000  |
| C | -5.02691300 | -0.39120400 | 0.93675900  |

|   |             |             |             |
|---|-------------|-------------|-------------|
| H | -4.63842600 | -2.00339300 | -0.44060200 |
| H | -5.16789700 | 1.37583000  | 2.16678200  |
| H | -5.93310500 | -0.83722500 | 1.33411200  |
| C | 2.68708900  | 0.78462100  | -0.09014600 |
| C | 3.43117100  | 1.43944600  | 0.90876900  |
| C | 3.13067500  | -0.46754000 | -0.56418400 |
| C | 4.59629400  | 0.85783000  | 1.40218400  |
| H | 3.07905600  | 2.38760900  | 1.30471100  |
| C | 4.29403300  | -1.05128900 | -0.04749900 |
| H | 2.63878400  | -0.92282000 | -1.42446000 |
| C | 5.02691400  | -0.39119700 | 0.93675200  |
| H | 5.16789400  | 1.37583600  | 2.16677800  |
| H | 4.63842900  | -2.00338300 | -0.44061100 |
| H | 5.93310700  | -0.83721500 | 1.33410300  |
| C | 0.00001600  | -1.10896700 | 2.09664900  |
| C | -0.00000100 | -2.02209600 | -2.25568800 |
| H | -0.91701900 | -1.78520500 | -2.79319600 |
| C | 0.00002600  | -2.44599700 | 1.64397900  |
| H | 0.91701600  | -1.78520700 | -2.79319700 |
| C | -0.00000400 | -3.06208700 | -1.30347600 |
| H | 0.00000600  | -2.61192800 | 0.15361900  |
| H | -0.91240100 | -3.63986600 | -1.15419400 |
| H | 0.91238800  | -3.63987800 | -1.15420300 |
| H | 0.91314500  | -3.03283100 | 1.74908000  |
| H | -0.91307700 | -3.03285300 | 1.74910500  |
| Y | -0.00000300 | -0.49067700 | -0.28969200 |
| H | -0.92301500 | -0.67068300 | 2.47443300  |
| H | 0.92304800  | -0.67066600 | 2.47441100  |

## Ni\_10\_II

E(B3LYP/BS1) = -937.814437 au

H(B3LYP/BS1) = -937.474135 au

G(B3LYP/BS1) = -937.54447 au

E(B3LYP/BS2//B3LYP/BS1, solvent = dichloromethane) = -2277.180603 au

E(M06/BS2//B3LYP/BS1, solvent = dichloromethane) = -2276.473393 au

|    |             |             |             |
|----|-------------|-------------|-------------|
| C  | -0.66493000 | -1.76067700 | -0.08099100 |
| C  | 0.79617500  | -1.71618200 | -0.10270200 |
| H  | -1.17999300 | -2.71578200 | -0.19371600 |
| H  | 1.36769300  | -2.64350400 | -0.14382000 |
| Ni | 0.07408900  | 0.96775800  | 0.04916300  |
| C  | -1.31688200 | 2.46144800  | 0.67044000  |
| H  | -0.74917500 | 3.20799300  | 1.21595400  |
| H  | -2.05437000 | 1.90358800  | 1.23764100  |
| C  | -1.30538800 | 2.40352100  | -0.69882800 |
| N  | 1.38134600  | -0.56523800 | -0.08801700 |
| N  | -1.29756700 | -0.65145800 | 0.08634500  |
| H  | -0.72379500 | 3.09925500  | -1.29545200 |
| H  | -2.02298800 | 1.78639400  | -1.23459100 |
| C  | 1.47559000  | 2.26738200  | -0.00364700 |
| H  | 2.14987400  | 1.97614300  | 0.80862900  |
| H  | 1.97560100  | 2.15991400  | -0.96980500 |
| H  | 1.13496600  | 3.29508100  | 0.13012100  |
| C  | 2.81427000  | -0.56286300 | -0.03794100 |
| C  | 3.46481100  | -1.14583100 | 1.05831800  |
| C  | 3.54993700  | 0.00015000  | -1.08810300 |

|   |             |             |             |
|---|-------------|-------------|-------------|
| C | 4.85889100  | -1.15476200 | 1.10333700  |
| H | 2.88245400  | -1.55685600 | 1.87818100  |
| C | 4.94224000  | -0.03737100 | -1.04138200 |
| H | 3.03749400  | 0.42277700  | -1.94575800 |
| C | 5.59863400  | -0.60505700 | 0.05454200  |
| H | 5.36366000  | -1.59310800 | 1.95870200  |
| H | 5.51501400  | 0.37828400  | -1.86463100 |
| H | 6.68349400  | -0.61804500 | 0.08994400  |
| C | -2.72447100 | -0.67488200 | 0.04064000  |
| C | -3.45967500 | -0.22524900 | 1.14716900  |
| C | -3.38312200 | -1.14510800 | -1.10561000 |
| C | -4.85253700 | -0.26112900 | 1.10505900  |
| H | -2.94417100 | 0.09000600  | 2.04934400  |
| C | -4.77750300 | -1.15214400 | -1.14349200 |
| H | -2.80544400 | -1.47039800 | -1.96638400 |
| C | -5.51347800 | -0.71388600 | -0.04051600 |
| H | -5.42178800 | 0.06203000  | 1.97116000  |
| H | -5.28643800 | -1.50215300 | -2.03632200 |
| H | -6.59841600 | -0.72613100 | -0.07183700 |

### TS<sub>Ni-10</sub>

E(B3LYP/BS1) = -937.798141 au

H(B3LYP/BS1) = -937.458151 au

G(B3LYP/BS1) = -937.526056 au

E(B3LYP/BS2//B3LYP/BS1, solvent = dichloromethane) = -2277.161549 au

E(M06/BS2//B3LYP/BS1, solvent = dichloromethane) = -2276.456615 au

|    |             |             |             |
|----|-------------|-------------|-------------|
| C  | 0.47957700  | -3.03208300 | -0.76574300 |
| C  | 1.52262700  | -2.12134500 | -0.59006300 |
| C  | -1.50788000 | -2.22699500 | -0.31309100 |
| H  | -1.83920000 | -2.01564900 | 0.70770100  |
| H  | -2.04500000 | -1.63442100 | -1.05752800 |
| H  | -1.69191300 | -3.27798800 | -0.51497600 |
| H  | 0.13519900  | -3.27587900 | -1.76566900 |
| H  | 0.31466300  | -3.79807400 | -0.01555900 |
| H  | 1.98425700  | -1.65319700 | -1.45764400 |
| H  | 2.14378700  | -2.18531300 | 0.29928500  |
| C  | 0.69887000  | 1.76744400  | -0.12286300 |
| C  | -0.75511400 | 1.76721700  | -0.12076700 |
| H  | 1.24679600  | 2.70813800  | -0.16971000 |
| H  | -1.30216000 | 2.70689700  | -0.19788200 |
| Ni | 0.02874900  | -0.90800800 | -0.13153300 |
| N  | 1.30254300  | 0.63314100  | 0.03295700  |
| N  | -1.35157900 | 0.63646800  | 0.06999500  |
| C  | 2.72752800  | 0.63594800  | 0.11775100  |
| C  | 3.50187300  | 1.31261600  | -0.83624000 |
| C  | 3.34276900  | -0.03151200 | 1.18658700  |
| C  | 4.89087900  | 1.32118500  | -0.71379300 |
| H  | 3.02165200  | 1.79503200  | -1.68301900 |
| C  | 4.72974300  | 0.00579800  | 1.31186600  |
| H  | 2.73218000  | -0.53380200 | 1.93088400  |
| C  | 5.50618400  | 0.67500100  | 0.36082000  |
| H  | 5.49096800  | 1.83054600  | -1.46147300 |
| H  | 5.20492900  | -0.48971100 | 2.15286100  |
| H  | 6.58756100  | 0.68758000  | 0.45473300  |
| C  | -2.77333500 | 0.62412800  | 0.12676100  |

|   |             |             |             |
|---|-------------|-------------|-------------|
| C | -3.53651700 | 1.21297800  | -0.89393700 |
| C | -3.40469700 | 0.01784300  | 1.22333000  |
| C | -4.92758600 | 1.19718600  | -0.80964200 |
| H | -3.04188300 | 1.64696200  | -1.75849700 |
| C | -4.79535200 | 0.03028800  | 1.30766500  |
| H | -2.80651000 | -0.41035300 | 2.02157600  |
| C | -5.55852900 | 0.61193000  | 0.29118600  |
| H | -5.51772000 | 1.64058400  | -1.60573300 |
| H | -5.28337300 | -0.41578300 | 2.16871000  |
| H | -6.64217900 | 0.60562400  | 0.35522600  |

## Pd\_10\_II

E(B3LYP/BS1) = -895.260123 au

H(B3LYP/BS1) = -894.919571 au

G(B3LYP/BS1) = -894.991161 au

E(B3LYP/BS2//B3LYP/BS1, solvent = dichloromethane) = -896.7604279 au

E(M06/BS2//B3LYP/BS1, solvent = dichloromethane) = -896.1185431 au

|    |             |             |             |
|----|-------------|-------------|-------------|
| C  | -0.67456900 | -1.90576300 | -0.04578600 |
| C  | 0.78584900  | -1.85858600 | -0.06405500 |
| H  | -1.16062800 | -2.87801500 | -0.14734900 |
| H  | 1.33447100  | -2.80140200 | -0.07564000 |
| C  | -1.30677800 | 2.60924500  | 0.73497200  |
| H  | -0.69083700 | 3.35019700  | 1.23437500  |
| H  | -2.02780100 | 2.08849200  | 1.35635800  |
| C  | -1.39311800 | 2.54916200  | -0.63883900 |
| N  | 1.41790700  | -0.73075400 | -0.08965100 |
| N  | -1.35309800 | -0.81940500 | 0.10475000  |
| H  | -0.84139400 | 3.23838000  | -1.27109100 |
| H  | -2.17597700 | 1.97029500  | -1.12234000 |
| C  | 1.54431100  | 2.37261400  | -0.16609200 |
| H  | 2.36009400  | 2.01718100  | 0.46738300  |
| H  | 1.83389500  | 2.37219000  | -1.22074900 |
| H  | 1.22069400  | 3.36899800  | 0.13851700  |
| Pd | 0.06769600  | 0.98870400  | 0.02564400  |
| C  | 2.84245000  | -0.75561900 | -0.02762600 |
| C  | 3.58886300  | -0.07073200 | -0.99648400 |
| C  | 3.48804700  | -1.47075600 | 0.99354200  |
| C  | 4.98011000  | -0.12828600 | -0.95492500 |
| H  | 3.08051100  | 0.46204300  | -1.79250900 |
| C  | 4.88086200  | -1.49965900 | 1.03749200  |
| H  | 2.90185100  | -1.96333500 | 1.76414000  |
| C  | 5.62837400  | -0.83503800 | 0.06248000  |
| H  | 5.55924000  | 0.38125800  | -1.71883200 |
| H  | 5.38024300  | -2.03909900 | 1.83637300  |
| H  | 6.71300200  | -0.86266100 | 0.09763600  |
| C  | -2.76965300 | -0.87214200 | 0.03948800  |
| C  | -3.52197300 | -0.23930900 | 1.04161600  |
| C  | -3.41720700 | -1.53699000 | -1.01545600 |
| C  | -4.91305000 | -0.29617000 | 0.99854000  |
| H  | -3.01444000 | 0.23336200  | 1.87646400  |
| C  | -4.80993400 | -1.56366900 | -1.06156800 |
| H  | -2.83159300 | -1.98907800 | -1.81089500 |
| C  | -5.55968000 | -0.94968700 | -0.05507100 |
| H  | -5.49340800 | 0.16919400  | 1.78928700  |
| H  | -5.30880500 | -2.06205400 | -1.88705700 |

H -6.64420800 -0.97690000 -0.09277000

### TS<sub>Pd-10</sub>

E(B3LYP/BS1) = -895.232616 au

H(B3LYP/BS1) = -894.892683 au

G(B3LYP/BS1) = -894.962369 au

E(B3LYP/BS2//B3LYP/BS1, solvent = dichloromethane) = -896.731436 au

E(M06/BS2//B3LYP/BS1, solvent = dichloromethane) = -896.092997 au

|    |             |             |             |
|----|-------------|-------------|-------------|
| C  | 0.39644700  | -3.29596800 | -0.02815300 |
| C  | 1.48632600  | -2.39050700 | -0.12159300 |
| C  | -1.53648400 | -2.45483900 | 0.14766900  |
| H  | -1.82374400 | -2.13399100 | 1.14972800  |
| H  | -2.06304400 | -1.92186800 | -0.64868900 |
| H  | -1.76401200 | -3.51118200 | 0.04292700  |
| H  | 0.11323800  | -3.84266800 | -0.92183000 |
| H  | 0.24300200  | -3.82778600 | 0.90575600  |
| H  | 1.98188000  | -2.28366500 | -1.08408700 |
| H  | 2.12572100  | -2.24302500 | 0.74809100  |
| C  | 0.69660500  | 1.93876700  | -0.01905400 |
| C  | -0.76237500 | 1.94427700  | -0.00102700 |
| H  | 1.22964600  | 2.88993800  | -0.00281800 |
| H  | -1.28472400 | 2.90084100  | -0.05461600 |
| N  | 1.33824200  | 0.81782300  | -0.07477800 |
| N  | -1.40099600 | 0.82704700  | 0.09464300  |
| C  | 2.76263300  | 0.84202000  | -0.02149500 |
| C  | 3.49982500  | 0.16359300  | -1.00198600 |
| C  | 3.41913600  | 1.54637500  | 0.99946800  |
| C  | 4.89161000  | 0.21325400  | -0.97059600 |
| H  | 2.98161600  | -0.35170900 | -1.80389200 |
| C  | 4.81276400  | 1.56704700  | 1.03413000  |
| H  | 2.84117300  | 2.03622000  | 1.77789200  |
| C  | 5.55066400  | 0.90691200  | 0.04905500  |
| H  | 5.46290800  | -0.29035500 | -1.74438500 |
| H  | 5.32029400  | 2.09708400  | 1.83422200  |
| H  | 6.63562700  | 0.92881100  | 0.07711700  |
| C  | -2.81895700 | 0.83347900  | 0.03349100  |
| C  | -3.48762100 | 1.50181900  | -1.00575500 |
| C  | -3.54848200 | 0.15239200  | 1.02002900  |
| C  | -4.88033400 | 1.48939800  | -1.04864800 |
| H  | -2.91643400 | 1.99056500  | -1.78993000 |
| C  | -4.94102200 | 0.16951200  | 0.97989000  |
| H  | -3.02516600 | -0.33393000 | 1.83654500  |
| C  | -5.60903000 | 0.82972000  | -0.05549400 |
| H  | -5.39572600 | 1.99379700  | -1.86024000 |
| H  | -5.50551000 | -0.33360300 | 1.75896400  |
| H  | -6.69405000 | 0.82664600  | -0.09010000 |
| Pd | 0.05187700  | -0.90973300 | -0.00455000 |

### Ni\_10\_IV

E(B3LYP/BS1) = -977.921648 au

H(B3LYP/BS1) = -977.540969 au

G(B3LYP/BS1) = -977.614691 au

E(B3LYP/BS2//B3LYP/BS1, solvent = dichloromethane) = -2317.257690 au

E(M06/BS2//B3LYP/BS1, solvent = dichloromethane) = -2316.518098 au

|    |             |             |             |
|----|-------------|-------------|-------------|
| C  | 0.74524500  | -1.95371800 | 0.22652900  |
| C  | -0.69507800 | -1.97402300 | 0.23314800  |
| H  | 1.31059900  | -2.88042300 | 0.33435900  |
| H  | -1.23386500 | -2.89908900 | 0.44499100  |
| N  | -1.30955800 | -0.86056400 | -0.03205500 |
| N  | 1.33084900  | -0.79918300 | 0.09461400  |
| C  | -2.73171200 | -0.88276100 | 0.03840000  |
| C  | -3.48986800 | -0.58801700 | -1.10272300 |
| C  | -3.37829600 | -1.19876400 | 1.24184400  |
| C  | -4.88182600 | -0.62675800 | -1.03842800 |
| H  | -2.98262700 | -0.35600400 | -2.03289500 |
| C  | -4.77201100 | -1.21631600 | 1.30112500  |
| H  | -2.78403800 | -1.39904100 | 2.12898800  |
| C  | -5.52778700 | -0.93458700 | 0.16169300  |
| H  | -5.46339800 | -0.41055600 | -1.93029000 |
| H  | -5.26540300 | -1.44973400 | 2.24065200  |
| H  | -6.61292100 | -0.95069700 | 0.20868300  |
| C  | 2.75247100  | -0.82464600 | -0.00054900 |
| C  | 3.38032800  | -1.57476400 | -1.00594300 |
| C  | 3.52887800  | -0.09922000 | 0.91281200  |
| C  | 4.77260400  | -1.60101000 | -1.09153900 |
| H  | 2.77243900  | -2.10772400 | -1.73165800 |
| C  | 4.91939900  | -0.14745100 | 0.83129000  |
| H  | 3.03717800  | 0.48047100  | 1.68551500  |
| C  | 5.54653100  | -0.89306100 | -0.17066800 |
| H  | 5.25011100  | -2.17531800 | -1.88071000 |
| H  | 5.51500100  | 0.40658800  | 1.55148500  |
| H  | 6.63056900  | -0.91576300 | -0.23657600 |
| C  | -1.42789800 | 2.02518700  | -0.49669700 |
| H  | -1.95179600 | 1.51325800  | -1.31792900 |
| H  | -2.04853700 | 1.88458300  | 0.40363100  |
| C  | -1.32575100 | 3.50923900  | -0.83195300 |
| H  | -0.77082800 | 3.68104800  | -1.76270900 |
| H  | -2.32517800 | 3.95190500  | -0.96809700 |
| H  | -0.82837300 | 4.08767400  | -0.04540700 |
| C  | 1.28000300  | 2.20143000  | -0.03999500 |
| H  | 1.09091000  | 2.98044400  | -0.78161200 |
| H  | 2.24547200  | 1.74452300  | -0.29236500 |
| C  | 1.33234700  | 2.80950500  | 1.36627100  |
| H  | 2.12661600  | 3.56847100  | 1.45688800  |
| H  | 0.38770200  | 3.29774600  | 1.63218400  |
| H  | 1.52335400  | 2.05477200  | 2.14154800  |
| Ni | 0.00223200  | 0.76176800  | -0.17479600 |

### Ni\_10\_V

E(B3LYP/BS1) = -937.404524 au

H(B3LYP/BS1) = -937.078090 au

G(B3LYP/BS1) = -937.144771 au

E(B3LYP/BS2//B3LYP/BS1, solvent = dichloromethane) = -2276.726710 au

E(M06/BS2//B3LYP/BS1, solvent = dichloromethane) = -2276.025671 au

|   |             |             |             |
|---|-------------|-------------|-------------|
| C | -0.72073500 | -1.88397500 | 0.01928600  |
| C | 0.71902300  | -1.88427700 | -0.00813100 |
| H | -1.27713600 | -2.82235400 | -0.00107000 |
| H | 1.27525700  | -2.82256100 | 0.01893800  |
| N | 1.31013700  | -0.72585700 | -0.08108600 |

|    |             |             |             |
|----|-------------|-------------|-------------|
| N  | -1.31167300 | -0.72503100 | 0.08368200  |
| C  | 2.72580400  | -0.68953900 | -0.02839500 |
| C  | 3.43691300  | -1.41380500 | 0.94268100  |
| C  | 3.42497100  | 0.09437800  | -0.95776100 |
| C  | 4.82979800  | -1.36103400 | 0.97267300  |
| H  | 2.89245400  | -1.98277700 | 1.69105800  |
| C  | 4.81745700  | 0.12544000  | -0.93179600 |
| H  | 2.86664200  | 0.65447400  | -1.69817300 |
| C  | 5.52509100  | -0.59779700 | 0.03239400  |
| H  | 5.37095900  | -1.91275600 | 1.73652200  |
| H  | 5.35200100  | 0.72378200  | -1.66436500 |
| H  | 6.61042600  | -0.55839500 | 0.05678600  |
| C  | -2.72721700 | -0.68867800 | 0.02883500  |
| C  | -3.42775100 | 0.10194800  | 0.95148300  |
| C  | -3.43696500 | -1.41946500 | -0.93839200 |
| C  | -4.82017200 | 0.13334600  | 0.92281600  |
| H  | -2.87054900 | 0.66700300  | 1.68893300  |
| C  | -4.82977900 | -1.36643100 | -0.97117800 |
| H  | -2.89144300 | -1.99379700 | -1.68188200 |
| C  | -5.52642700 | -0.59637600 | -0.03749700 |
| H  | -5.35575700 | 0.73698800  | 1.65026000  |
| H  | -5.36980200 | -1.92329900 | -1.73209300 |
| H  | -6.61170400 | -0.55676900 | -0.06404500 |
| C  | 0.00331700  | 3.43612200  | 0.00022200  |
| C  | -1.10832700 | 2.40375100  | 0.18919800  |
| C  | 1.11331700  | 2.40166400  | -0.18653200 |
| H  | -1.56064600 | 2.39790700  | 1.18785900  |
| H  | -1.88413200 | 2.38745900  | -0.58506300 |
| H  | 1.88650800  | 2.38280700  | 0.59023200  |
| H  | 1.56883100  | 2.39547900  | -1.18373000 |
| H  | -0.14301300 | 4.08532000  | -0.87325200 |
| H  | 0.15043600  | 4.08846000  | 0.87125600  |
| Ni | 0.00041200  | 0.83705700  | -0.00092000 |

### **Pd\_10\_IV**

E(B3LYP/BS1) = -935.369063 au

H(B3LYP/BS1) = -934.988405 au

G(B3LYP/BS1) = -935.063513 au

E(B3LYP/BS2//B3LYP/BS1, solvent = dichloromethane) = -936.840489 au

E(M06/BS2//B3LYP/BS1, solvent = dichloromethane) = -936.168221 au

|   |             |             |             |
|---|-------------|-------------|-------------|
| C | 0.72526400  | -2.10163900 | -0.01343200 |
| C | -0.72718000 | -2.10147100 | 0.01255800  |
| H | 1.24023700  | -3.06466400 | -0.06275000 |
| H | -1.24228800 | -3.06447000 | 0.06126400  |
| N | -1.37773200 | -0.98532000 | -0.03793100 |
| N | 1.37603900  | -0.98560000 | 0.03774000  |
| C | -2.78984000 | -1.02717900 | 0.06005300  |
| C | -3.55216700 | -0.25116800 | -0.82534400 |
| C | -3.43488300 | -1.81132400 | 1.03104100  |
| C | -4.94314900 | -0.29417500 | -0.76360300 |
| H | -3.04316000 | 0.36046000  | -1.56136300 |
| C | -4.82717000 | -1.82921800 | 1.09954300  |
| H | -2.84266800 | -2.36872300 | 1.75117200  |
| C | -5.58559300 | -1.07909100 | 0.19812600  |



|    |             |             |             |
|----|-------------|-------------|-------------|
| H  | -5.52734800 | 0.29708300  | -1.46307500 |
| H  | -5.31873900 | -2.42549900 | 1.86332200  |
| H  | -6.67036000 | -1.09515000 | 0.25317100  |
| C  | 2.78820000  | -1.02794900 | -0.06005900 |
| C  | 3.43295500  | -1.81124400 | -1.03189500 |
| C  | 3.55077400  | -0.25351800 | 0.82646700  |
| C  | 4.82525000  | -1.82977100 | -1.10023700 |
| H  | 2.84052900  | -2.36748300 | -1.75275700 |
| C  | 4.94174400  | -0.29717700 | 0.76488200  |
| H  | 3.04197900  | 0.35744700  | 1.56318600  |
| C  | 5.58393100  | -1.08118000 | -0.19777200 |
| H  | 5.31660600  | -2.42537300 | -1.86467900 |
| H  | 5.52614400  | 0.29287400  | 1.46520300  |
| H  | 6.66869800  | -1.09773800 | -0.25266500 |
| C  | -1.38289200 | 2.37109600  | -0.13176800 |
| H  | -2.31426700 | 1.92853900  | 0.24802000  |
| H  | -1.10999000 | 3.18740600  | 0.54566400  |
| Pd | 0.00079600  | 0.85010700  | -0.00007800 |
| C  | -1.58779000 | 2.91684400  | -1.54736000 |
| H  | -1.86913000 | 2.13253300  | -2.26253400 |
| H  | -2.38330700 | 3.67974400  | -1.57600800 |
| H  | -0.67638800 | 3.38577600  | -1.93606100 |
| C  | 1.38598400  | 2.37000700  | 0.13214600  |
| H  | 1.11367200  | 3.18618900  | -0.54565200 |
| H  | 2.31691700  | 1.92646800  | -0.24753400 |
| C  | 1.59128300  | 2.91631700  | 1.54742000  |
| H  | 1.87139000  | 2.13212500  | 2.26317700  |
| H  | 2.38786400  | 3.67812700  | 1.57558900  |
| H  | 0.68053500  | 3.38686100  | 1.93564900  |

### Pd\_10\_V

E(B3LYP/BS1) = -894.848475 au

H(B3LYP/BS1) = -894.520454 au

G(B3LYP/BS1) = -894.592329 au

E(B3LYP/BS2//B3LYP/BS1, solvent = dichloromethane) = -896.305893 au

E(M06/BS2//B3LYP/BS1, solvent = dichloromethane) = -895.672924 au

|   |             |             |             |
|---|-------------|-------------|-------------|
| C | -0.72647500 | -2.03001500 | 0.00923500  |
| C | 0.72607300  | -2.03015400 | -0.00884600 |
| H | -1.24290200 | -2.99354800 | -0.00431300 |
| H | 1.24234100  | -2.99376300 | 0.00499500  |
| N | 1.36935500  | -0.90928400 | -0.05926400 |
| N | -1.36959400 | -0.90903700 | 0.05935900  |
| C | 2.78122500  | -0.91334800 | -0.01290600 |
| C | 3.50163600  | -1.79366500 | 0.81340900  |
| C | 3.47269400  | 0.01605700  | -0.80516600 |
| C | 4.89459800  | -1.75658300 | 0.82341500  |
| H | 2.96922800  | -2.47081400 | 1.47510900  |
| C | 4.86521400  | 0.03055300  | -0.80424300 |
| H | 2.90150600  | 0.70457500  | -1.41699400 |
| C | 5.58116100  | -0.85306700 | 0.00844900  |
| H | 5.44424900  | -2.42853300 | 1.47686700  |
| H | 5.39337400  | 0.74309000  | -1.43157400 |
| H | 6.66712500  | -0.82665600 | 0.01924800  |
| C | -2.78148300 | -0.91304300 | 0.01291500  |

|    |             |             |             |
|----|-------------|-------------|-------------|
| C  | -3.47307800 | 0.01581500  | 0.80569800  |
| C  | -3.50175600 | -1.79298200 | -0.81391600 |
| C  | -4.86560200 | 0.03021200  | 0.80464800  |
| H  | -2.90203900 | 0.70395900  | 1.41806900  |
| C  | -4.89472500 | -1.75599000 | -0.82403400 |
| H  | -2.96921100 | -2.46974500 | -1.47589700 |
| C  | -5.58141800 | -0.85295000 | -0.00866000 |
| H  | -5.39387700 | 0.74232600  | 1.43236300  |
| H  | -5.44426700 | -2.42762500 | -1.47790100 |
| H  | -6.66738200 | -0.82659200 | -0.01953900 |
| C  | -0.00025100 | 3.64336200  | -0.00000900 |
| C  | -1.14163800 | 2.62740100  | 0.11808900  |
| C  | 1.14186300  | 2.62814000  | -0.11779100 |
| H  | -1.66262900 | 2.63995700  | 1.08108400  |
| H  | -1.85597700 | 2.62600000  | -0.71108300 |
| H  | 1.85582400  | 2.62708900  | 0.71169700  |
| H  | 1.66326200  | 2.64117300  | -1.08055200 |
| H  | -0.09124100 | 4.29358900  | -0.88011300 |
| H  | 0.09026700  | 4.29414300  | 0.87974200  |
| Pd | 0.00034300  | 0.92067800  | -0.00007800 |

#### Ti\_4\_IIa

E(B3LYP/BS1) = -872.686281 au

H(B3LYP/BS1) = -872.356975 au

G(B3LYP/BS1) = -872.427445 au

E(B3LYP/BS2//B3LYP/BS1, solvent = dichloromethane) = -1664.339769 au

E(M06/BS2//B3LYP/BS1, solvent = dichloromethane) = -1663.844284 au

|    |             |             |             |
|----|-------------|-------------|-------------|
| C  | 0.11558700  | 0.23217500  | -1.56814700 |
| C  | 1.41041300  | -0.07538000 | -1.04132500 |
| C  | 1.30223400  | -1.26908800 | -0.25841100 |
| C  | -0.81109300 | -0.75070400 | -1.09530300 |
| C  | -0.05936500 | -1.68677600 | -0.28669100 |
| Si | -2.60248600 | -0.34888900 | -0.66976600 |
| N  | -2.07059400 | 0.45177700  | 0.81807900  |
| Ti | -0.18553300 | 0.37394500  | 0.78347200  |
| H  | -2.66527300 | 0.67369700  | 1.61641700  |
| H  | -3.25957700 | 0.56329400  | -1.63266000 |
| H  | -3.44972800 | -1.53459400 | -0.41134000 |
| C  | 0.51974800  | -0.32050800 | 2.58359300  |
| H  | 0.06372200  | 0.36944100  | 3.31660800  |
| H  | 1.61304300  | -0.24019700 | 2.66221100  |
| C  | 1.06942100  | 2.66887900  | 0.83741900  |
| H  | 1.82903700  | 2.31829000  | 1.53529900  |
| H  | 1.39445600  | 2.87729300  | -0.17669700 |
| C  | -0.18306800 | 2.95419900  | 1.24930300  |
| H  | -0.47876800 | 2.83839400  | 2.29096200  |
| H  | -0.92574000 | 3.37572500  | 0.57729800  |
| C  | 2.70333700  | 0.61068400  | -1.38570000 |
| H  | 3.37104800  | 0.70280400  | -0.52298200 |
| H  | 3.24088100  | 0.02601300  | -2.14349600 |
| H  | 2.54626200  | 1.60683100  | -1.80758900 |
| C  | 2.44920300  | -2.00515800 | 0.36931500  |
| H  | 2.13653400  | -2.58899500 | 1.23875200  |
| H  | 2.88702700  | -2.70525200 | -0.35428500 |
| H  | 3.24710400  | -1.32701900 | 0.68622700  |

|   |             |             |             |
|---|-------------|-------------|-------------|
| C | -0.59869100 | -2.93998600 | 0.34399700  |
| H | -0.54240300 | -3.76182200 | -0.38183200 |
| H | -0.02337500 | -3.24029000 | 1.22323900  |
| H | -1.64684500 | -2.84373400 | 0.63916400  |
| C | -0.20236000 | 1.37154300  | -2.49878800 |
| H | 0.00013200  | 1.06467400  | -3.53307000 |
| H | -1.25544700 | 1.66153800  | -2.45343100 |
| H | 0.40673300  | 2.26045400  | -2.30738600 |
| H | 0.22967500  | -1.34060200 | 2.85679700  |

### TS<sub>Ti-4-IIa</sub>

E(B3LYP/BS1) = -872.673953 au

H(B3LYP/BS1) = -872.344681 au

G(B3LYP/BS1) = -872.410492 au

E(B3LYP/BS2//B3LYP/BS1, solvent = dichloromethane) = -1664.325795 au

E(M06/BS2//B3LYP/BS1, solvent = dichloromethane) = -1663.834238 au

|    |             |             |             |
|----|-------------|-------------|-------------|
| C  | -0.25650800 | 0.47094400  | 1.55268800  |
| C  | 1.03248200  | 0.91205700  | 1.11563600  |
| C  | 0.87822800  | 1.56823900  | -0.14119000 |
| C  | -1.22817400 | 0.87116600  | 0.56969100  |
| C  | -0.51455900 | 1.55408200  | -0.47578100 |
| Si | -2.73505500 | -0.18867700 | 0.17385500  |
| N  | -1.69577200 | -1.35672900 | -0.65216900 |
| Ti | 0.06181500  | -0.68588600 | -0.50221800 |
| H  | -2.00079200 | -2.22677800 | -1.08775400 |
| H  | -3.41011800 | -0.74862100 | 1.36649800  |
| H  | -3.72024400 | 0.46190000  | -0.71963200 |
| C  | 1.21236600  | -1.08568900 | -2.23257800 |
| H  | 1.18517900  | -1.85359600 | -3.00536200 |
| H  | 0.37692500  | -0.36975600 | -2.49944800 |
| H  | 2.15328400  | -0.53213900 | -2.28823900 |
| C  | 1.15995000  | -2.26897700 | 0.58429700  |
| H  | 1.84916600  | -1.83056500 | 1.29960700  |
| H  | 0.34033700  | -2.85169900 | 1.00141900  |
| C  | 1.63543300  | -2.59614400 | -0.69477000 |
| H  | 2.67726800  | -2.43324300 | -0.95131600 |
| H  | 1.13713900  | -3.37264600 | -1.26726400 |
| C  | -1.12371500 | 2.21629900  | -1.68419300 |
| H  | -1.34839000 | 3.26443800  | -1.44821500 |
| H  | -0.44841900 | 2.21939400  | -2.54519000 |
| H  | -2.06322200 | 1.74763800  | -1.98866500 |
| C  | -0.54539000 | -0.19920700 | 2.86822100  |
| H  | 0.24450800  | -0.89499900 | 3.16698100  |
| H  | -0.62329100 | 0.55957500  | 3.65741100  |
| H  | -1.49164500 | -0.74558600 | 2.85268000  |
| C  | 2.31530200  | 0.80565700  | 1.88893600  |
| H  | 3.17876300  | 0.62000000  | 1.24164700  |
| H  | 2.51004900  | 1.74794400  | 2.41766300  |
| H  | 2.27769600  | 0.01865400  | 2.64695900  |
| C  | 1.96869600  | 2.26256400  | -0.90939800 |
| H  | 2.05832600  | 3.30579000  | -0.57992000 |
| H  | 2.94477500  | 1.79262500  | -0.75407600 |
| H  | 1.76927800  | 2.28377300  | -1.98511600 |

### Zr\_4\_IIa

E(B3LYP/BS1) = -861.198663 au  
 H(B3LYP/BS1) = -860.870056 au  
 G(B3LYP/BS1) = -860.942899 au  
 E(B3LYP/BS2//B3LYP/BS1, solvent = dichloromethane) = -861.968390 au  
 E(M06/BS2//B3LYP/BS1, solvent = dichloromethane) = -861.467984 au

|    |             |             |             |
|----|-------------|-------------|-------------|
| C  | 0.05900900  | 0.23264200  | 1.69265300  |
| C  | 0.83629700  | 1.26505400  | 1.07485800  |
| C  | 0.00909700  | 1.92259800  | 0.10228300  |
| C  | -1.23962000 | 0.21702000  | 1.08621400  |
| C  | -1.26676300 | 1.29085800  | 0.11185100  |
| Si | -2.28333700 | -1.34448600 | 0.88306800  |
| N  | -1.28170900 | -1.91887800 | -0.45326900 |
| H  | -1.55221700 | -2.67582700 | -1.08100400 |
| H  | -2.25195200 | -2.22055100 | 2.07777500  |
| H  | -3.68468800 | -1.06930000 | 0.49016500  |
| C  | 0.11057900  | 0.25645600  | -2.76335400 |
| H  | 0.25801700  | -0.62996200 | -3.41073900 |
| H  | 0.93919800  | 0.95399600  | -2.96713200 |
| C  | 2.91975400  | -1.25037600 | -0.08889000 |
| H  | 3.43999900  | -0.37215800 | -0.46702700 |
| H  | 2.92401900  | -1.39490900 | 0.98811300  |
| C  | 2.38053600  | -2.16710200 | -0.91927500 |
| H  | 2.46759000  | -2.07140000 | -2.00245100 |
| H  | 1.94365700  | -3.09037300 | -0.54102900 |
| Zr | 0.20280500  | -0.53982400 | -0.70177500 |
| C  | -2.47028400 | 1.73478600  | -0.67371000 |
| H  | -3.05742400 | 2.43862400  | -0.06915600 |
| H  | -2.19390600 | 2.24792200  | -1.59792900 |
| H  | -3.13257900 | 0.90361900  | -0.93078800 |
| C  | 0.39124200  | 3.14982700  | -0.67635600 |
| H  | 0.18654600  | 4.05158700  | -0.08438400 |
| H  | 1.45676000  | 3.16482300  | -0.92576500 |
| H  | -0.17312400 | 3.23613900  | -1.60820600 |
| C  | 2.19493900  | 1.74810600  | 1.50874100  |
| H  | 2.08445000  | 2.59700800  | 2.19586800  |
| H  | 2.76221100  | 0.98038600  | 2.04174700  |
| H  | 2.80075200  | 2.10037400  | 0.66758000  |
| C  | 0.50507300  | -0.64261200 | 2.83498100  |
| H  | 0.18991200  | -0.19266800 | 3.78515600  |
| H  | 0.06046400  | -1.64175800 | 2.79655700  |
| H  | 1.59254300  | -0.75214000 | 2.88290900  |
| H  | -0.81289700 | 0.74090600  | -3.09928300 |

### TS<sub>Zr-4-IIa</sub>

E(B3LYP/BS1) = -861.183231 au  
 H(B3LYP/BS1) = -860.854945 au  
 G(B3LYP/BS1) = -860.922702 au  
 E(B3LYP/BS2//B3LYP/BS1, solvent = dichloromethane) = -861.950226 au  
 E(M06/BS2//B3LYP/BS1, solvent = dichloromethane) = -861.452643 au

|   |             |            |             |
|---|-------------|------------|-------------|
| C | -0.80103000 | 0.67950000 | 1.41608100  |
| C | 0.04427400  | 1.68249200 | 0.84424300  |
| C | -0.30870900 | 1.83227700 | -0.53333300 |
| C | -1.69600700 | 0.20361800 | 0.39236100  |
| C | -1.38760500 | 0.92690400 | -0.81086500 |

|    |             |             |             |
|----|-------------|-------------|-------------|
| Si | -2.30373500 | -1.58206700 | 0.34280200  |
| N  | -0.72819300 | -2.17250100 | -0.19829900 |
| H  | -0.52898400 | -3.15244200 | -0.39782700 |
| H  | -2.70439400 | -2.10589200 | 1.66909900  |
| H  | -3.38786900 | -1.81570500 | -0.63997600 |
| C  | 2.17697300  | -0.92458900 | -1.84690500 |
| H  | 3.18383000  | -0.90060600 | -2.25913200 |
| H  | 1.69561500  | -1.86125300 | -2.18552400 |
| H  | 1.64483200  | -0.05350800 | -2.31379800 |
| C  | 2.19531100  | -0.93745600 | 1.27812000  |
| H  | 2.28049200  | -0.03313000 | 1.87518000  |
| H  | 1.82663600  | -1.81985600 | 1.80115200  |
| C  | 3.08299500  | -1.11244900 | 0.20579900  |
| H  | 3.78890600  | -0.32708400 | -0.04490300 |
| H  | 3.37687700  | -2.10901700 | -0.11017500 |
| Zr | 0.52189800  | -0.56647100 | -0.35506700 |
| C  | -2.11287300 | 0.82234900  | -2.12940300 |
| H  | -2.88726400 | 1.59826600  | -2.18511400 |
| H  | -1.45128900 | 0.97362400  | -2.98907600 |
| H  | -2.61491700 | -0.14094900 | -2.25186000 |
| C  | -0.82715300 | 0.29273000  | 2.87163900  |
| H  | 0.17009800  | 0.28590200  | 3.32240300  |
| H  | -1.42995700 | 1.01661000  | 3.43481400  |
| H  | -1.27640700 | -0.69109000 | 3.02845400  |
| C  | 1.03214700  | 2.53987600  | 1.58635100  |
| H  | 1.89943900  | 2.80587600  | 0.97301900  |
| H  | 0.55637200  | 3.48164600  | 1.88994700  |
| H  | 1.39345800  | 2.05903300  | 2.49973200  |
| C  | 0.23824600  | 2.87801400  | -1.47061000 |
| H  | -0.31919900 | 3.81652800  | -1.35349300 |
| H  | 1.29037500  | 3.10512200  | -1.27155000 |
| H  | 0.14767200  | 2.58362000  | -2.52068200 |

#### Hf\_4\_IIa

E(B3LYP/BS1) = -863.537005 au

H(B3LYP/BS1) = -863.208336 au

G(B3LYP/BS1) = -863.281345 au

E(B3LYP/BS2//B3LYP/BS1, solvent = dichloromethane) = -862.926188 au

E(M06/BS2//B3LYP/BS1, solvent = dichloromethane) = -862.441906 au

|    |             |             |             |
|----|-------------|-------------|-------------|
| C  | 0.17688200  | 0.62448800  | 1.73409400  |
| C  | 1.23656500  | 1.21307100  | 0.96797900  |
| C  | 0.65081200  | 1.90052400  | -0.14694000 |
| C  | -1.06892400 | 0.91609100  | 1.08904500  |
| C  | -0.76248000 | 1.72423900  | -0.07693500 |
| Si | -2.55409200 | -0.25139900 | 1.11155400  |
| N  | -1.81590900 | -1.33776500 | -0.08201800 |
| H  | -2.34978100 | -2.05454200 | -0.57219800 |
| H  | -2.77529600 | -0.88249600 | 2.43313600  |
| H  | -3.80566600 | 0.37189900  | 0.62423700  |
| C  | 0.23571500  | -0.32828500 | -2.65784800 |
| H  | 0.03486000  | -1.30518100 | -3.13516600 |
| H  | 1.26035900  | -0.04012200 | -2.94586400 |
| C  | 2.29199900  | -1.92021300 | 0.28796400  |
| H  | 2.99038800  | -1.40902200 | -0.37364000 |
| H  | 2.42024600  | -1.75612400 | 1.35368700  |

|    |             |             |             |
|----|-------------|-------------|-------------|
| C  | 1.38282800  | -2.80081300 | -0.18621100 |
| H  | 1.33427700  | -3.04675700 | -1.24832100 |
| H  | 0.74903500  | -3.38152100 | 0.48143600  |
| Hf | -0.00998500 | -0.55423400 | -0.48825100 |
| C  | -1.77079300 | 2.36542000  | -0.99385800 |
| H  | -2.07848400 | 3.33215600  | -0.57447100 |
| H  | -1.36168000 | 2.55528700  | -1.98931000 |
| H  | -2.67625500 | 1.76305600  | -1.10831000 |
| C  | 0.34103400  | -0.10822700 | 3.04091100  |
| H  | 1.30930800  | -0.61082900 | 3.12756900  |
| H  | 0.28138900  | 0.60707800  | 3.87112000  |
| H  | -0.44569600 | -0.85016900 | 3.20552900  |
| C  | 2.68440500  | 1.31253600  | 1.37062700  |
| H  | 3.36092300  | 1.27593700  | 0.51069000  |
| H  | 2.86399100  | 2.27089300  | 1.87450700  |
| H  | 2.97896900  | 0.52705800  | 2.07189900  |
| C  | 1.39462100  | 2.76861100  | -1.12369200 |
| H  | 0.87828300  | 2.84095900  | -2.08430300 |
| H  | 1.49127300  | 3.78735400  | -0.72610400 |
| H  | 2.40715500  | 2.39978100  | -1.31376500 |
| H  | -0.43600000 | 0.38945100  | -3.14672700 |

### TS<sub>Hf4-IIa</sub>

E(B3LYP/BS1) = -863.519262 au

H(B3LYP/BS1) = -863.191013 au

G(B3LYP/BS1) = -863.25906 au

E(B3LYP/BS2//B3LYP/BS1, solvent = dichloromethane) = -862.904708 au

E(M06/BS2//B3LYP/BS1, solvent = dichloromethane) = -862.424050 au

|    |             |             |             |
|----|-------------|-------------|-------------|
| C  | -0.87199900 | 0.93268500  | 1.37029900  |
| C  | 0.09595900  | 1.81512100  | 0.79649500  |
| C  | -0.15904100 | 1.90714600  | -0.60940700 |
| C  | -1.74785900 | 0.47276500  | 0.31913100  |
| C  | -1.29795500 | 1.08711000  | -0.90366100 |
| Si | -2.52022900 | -1.25199400 | 0.33689300  |
| N  | -0.97612000 | -2.03272700 | -0.04986800 |
| H  | -0.88991600 | -3.04109700 | -0.16474800 |
| H  | -3.05977400 | -1.63882100 | 1.66069300  |
| H  | -3.55251600 | -1.44528700 | -0.70800900 |
| C  | 1.97600700  | -0.96877300 | -1.68649900 |
| H  | 2.94158100  | -0.76955100 | -2.14886100 |
| H  | 1.67355200  | -1.99607600 | -1.94881800 |
| H  | 1.27074800  | -0.25314700 | -2.20595300 |
| C  | 2.01035700  | -0.94538700 | 1.40456600  |
| H  | 2.09331900  | -0.06701900 | 2.04032400  |
| H  | 1.70055300  | -1.86177200 | 1.90876800  |
| C  | 2.91018700  | -1.05884000 | 0.32401200  |
| H  | 3.57521500  | -0.23370000 | 0.08854000  |
| H  | 3.26476800  | -2.03298600 | 0.00056300  |
| Hf | 0.37371500  | -0.54467300 | -0.19526600 |
| C  | -1.95790700 | 0.96701900  | -2.25592900 |
| H  | -2.68332600 | 1.78060700  | -2.38291000 |
| H  | -1.24387400 | 1.04542700  | -3.08214700 |
| H  | -2.50713800 | 0.02843800  | -2.36968100 |
| C  | -1.02104900 | 0.64107000  | 2.84160500  |
| H  | -0.05827200 | 0.59110800  | 3.35933600  |

|   |             |             |             |
|---|-------------|-------------|-------------|
| H | -1.60274400 | 1.44013800  | 3.31850300  |
| H | -1.55235500 | -0.29636900 | 3.02470600  |
| C | 1.11611700  | 2.62416200  | 1.54953700  |
| H | 2.03263000  | 2.78246800  | 0.97180100  |
| H | 0.71033300  | 3.61745000  | 1.78166700  |
| H | 1.38836200  | 2.16287700  | 2.50322000  |
| C | 0.53998200  | 2.83738200  | -1.56681500 |
| H | 0.07264300  | 3.83013100  | -1.53760200 |
| H | 1.59648200  | 2.97360600  | -1.31542800 |
| H | 0.48153100  | 2.48829400  | -2.60223000 |
